# Supplementary material for: HFIP-assisted reductive C–S, C–N, and C–X coupling of carbonyl compounds: a combined computational and experimental mechanistic study
Source: Royal Society of Chemistry journal article supplement (doi:10.1039/d2qo01932a), 2023-01-01
Supplement: d2qo01932a1.pdf [file d2qo01932a1.pdf]

## Supporting Information

# HFIP-Assisted Reductive C–S, C–N, and C–X Coupling of Carbonyl Compounds: A Combined Computational and Experimental Mechanistic Study

Jabir Khan,<sup>a</sup> Aparna Tyagi,<sup>a</sup> Dibyajyoti Ghosh,<sup>a,\*</sup> Chinmoy Kumar Hazra<sup>a,\*</sup>

Department of Chemistry, Indian Institute of Technology Delhi, Hauz Khas, New Delhi, 110016, India.

Email: [chinmoy@chemistry.iitd.ac.in](mailto:chinmoy@chemistry.iitd.ac.in)

Email: [dibyajyoti@iitd.ac.in](mailto:dibyajyoti@iitd.ac.in)

---

### Table of contents

|                                                                                                                  |         |
|------------------------------------------------------------------------------------------------------------------|---------|
| 1. General Information                                                                                           | S2      |
| 2. Synthesis of 1-Benzylindoline -2,3-dione                                                                      | S2      |
| 3. General Procedure                                                                                             |         |
| 3.1 General Procedure for Reductive C–S and C–N Coupling of Carbonyl Groups ( <b>A</b> )                         | S2      |
| 3.2 General Procedure for deoxygenated halogenation of Carbonyl Groups ( <b>B</b> )                              | S3      |
| 4. Characterization Data of Synthesized Products                                                                 | S3-S15  |
| 5. Control Experiments                                                                                           | S15-S17 |
| 6. Further Derivatization                                                                                        | S17-S19 |
| 6.1 Synthesis of 3-Tosylindolin-2-one ( <b>8a</b> )                                                              |         |
| 6.2 Synthesis of 3-((4-Methoxyphenyl) thio)-1 <i>H</i> -indole ( <b>8b</b> )                                     |         |
| 6.3 Synthesis of 1-Bromo-4-(( <i>p</i> -tolylsulfinyl) methyl) benzene ( <b>8c</b> )                             |         |
| 6.4 Synthesis of [1,1'-Biphenyl]-4-yl(4-methylbenzyl) sulfane ( <b>8d</b> )                                      |         |
| 6.5 Synthesis of 1,3-Dibenzyl-3-( <i>p</i> -tolylthio) indolin-2-one ( <b>8e</b> )                               |         |
| 7. Late-Stage Diversification                                                                                    | S19-S20 |
| 8. Computational Details                                                                                         | S20-29  |
| 9. Copies of <sup>1</sup> H and <sup>13</sup> C { <sup>1</sup> H} NMR Spectra of Starting Materials and Products | S30-S91 |
| 10. Copies of <sup>1</sup> H NMR Spectra of NMR Study                                                            | S92-S93 |
| 11. References                                                                                                   | S94     |

## 1. General Information:

All reagents and solvents were of pure analytical grade. Analytical thin-layer chromatography (TLC) was carried out using 0.2 mm commercial silica gel plates (silica gel 60, F254, EMD Chemical). The vials (Wheaton® Standard Scintillation Vials, 1 dram, 15x45 mm with PTFE lined cap attached) were purchased from DAIHAN and dried in an oven overnight. High-resolution mass spectra (HRMS) were recorded on a mass spectrometer using electrospray ionization-time-of-flight (ESITOF) reflectron experiments. All reactions were run in flame- or oven-dried glassware. <sup>1</sup>H-NMR and <sup>13</sup>C-NMR were recorded on 400 MHz and 500 MHz spectrometers using CDCl<sub>3</sub> as a solvent; the chemical shifts are reported as parts per million (ppm) referenced to residual protium or carbon of the solvents; CDCl<sub>3</sub> δ H (7.26 ppm). Coupling constants were reported in Hertz (Hz). Data for <sup>1</sup>H NMR spectra are reported as follows: chemical shift (ppm, referenced to protium; s = singlet, d = doublet, t = triplet, q = quartet, quin = quintet, sext = sextet, dd = doublet of doublets, td = triplet of doublets, ddd = doublet of doublet of doublets, m = multiplet, coupling constant (Hz), and integration). All reagents, such as aldehydes, ketone, isatin, thiols, trityl salt, and silanes, were purchased from Sigma-Aldrich, TCI, or Alfa Aesar.

**2. Synthesis of 1-Benzylindoline -2,3-dione:** Isatin (1.2 mmol) was added to a mixture of benzyl bromide (1.0 mmol) and K<sub>2</sub>CO<sub>3</sub> (1.0 mmol) in acetonitrile (10 mL) at 25 °C. After that, the reaction mixture was stirred for 24 h under reflux conditions. Then, the solvent was evaporated under a vacuum, and the crude product was purified by column chromatography (SiO<sub>2</sub>, Hexane/EtOAc = 80:20) (Scheme S1).<sup>1</sup>

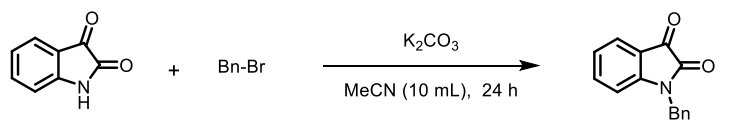

**Scheme S1:** 1-Benzylindoline -2,3-dione.

## 3. General Procedure

**3.1 General Procedure for Reductive C–S and C–N Coupling of Carbonyl Groups with Thiols and Anilines (A):** A 5 mL Round-bottom flask was charged with carbonyl compounds (isatins or aldehydes, 0.2 mmol), nucleophiles (thiols or anilines, 0.22 mmol), Me<sub>2</sub>SiHCl (**3a**, 33 μL, 0.3 mmol) in 0.3 mL HFIP. The reaction mixture was then stirred at 25 °C for 5.0 min. After completion, the crude reaction mixture was concentrated in rotavapor and purified by column chromatography over silica in the eluent system EtOAc/Hexane to give the desired product, which was confirmed by <sup>1</sup>H NMR, <sup>13</sup>C NMR and HRMS (Scheme S2A).

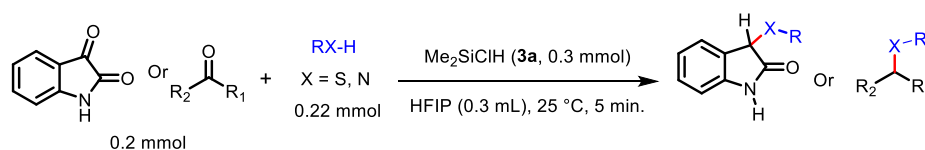

**Scheme S2A:** Reductive C–S and C–N Coupling of Carbonyl Groups with Thiols and Anilines.

### 3.2 General Procedure for deoxygenated halogenation of Carbonyl Groups with HCl and KI (B)

A 5.0 mL Round-bottom flask was charged with carbonyl groups (0.2 mmol), HCl or KI (0.22 mmol), Me<sub>2</sub>SiHCl (**3a**, 33  $\mu$ L, 0.3 mmol) in 0.3 mL HFIP. The reaction mixture was then stirred at 25  $^{\circ}$ C for 30.0 min. After completion, the crude reaction mixture was concentrated and purified by column chromatography over silica in the eluent system hexane to give the desired products, which were confirmed by <sup>1</sup>H NMR, <sup>13</sup>C NMR, and HRMS (Scheme S2B).

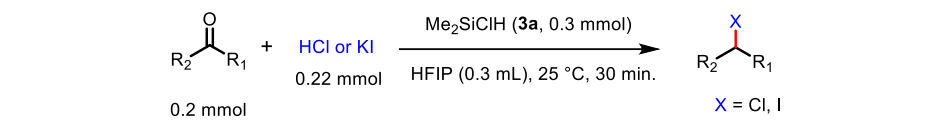

Scheme S2B: Reductive C–S Coupling of Carbonyl Groups with Thiols.

### 3. Characterization Data of Synthesized Products

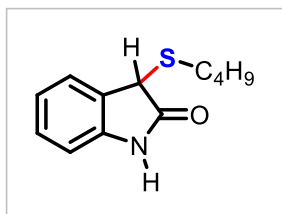

**3-(Butylthio) indolin-2-one (4a)<sup>2</sup>**; General procedure (A) was followed using isatin (**1a**, 29.5 mg, 0.2 mmol) to give a crude mixture which was purified by column chromatography (SiO<sub>2</sub>, Hexane/ethyl acetate = 70/30) to afford the title compound as a pink solid (42 mg, 94%); mp = 52–54  $^{\circ}$ C; <sup>1</sup>H NMR (500 MHz, CDCl<sub>3</sub>)  $\delta$  9.02 (s, 1H), 7.37 (d,  $J$  = 7.5 Hz, 1H), 7.24 (t,  $J$  = 7.2 Hz, 1H), 7.07 (t,  $J$  = 7.6 Hz, 1H), 6.92 (d,  $J$  = 7.8 Hz, 1H), 4.31 (s, 1H), 2.73 – 2.61 (m, 1H), 2.54 – 2.41 (m, 1H), 1.58 – 1.45 (m, 2H), 1.43 – 1.31 (m, 2H), 0.84 (t,  $J$  = 7.3 Hz, 3H); <sup>13</sup>C{<sup>1</sup>H} NMR (126 MHz, CDCl<sub>3</sub>)  $\delta$  178.4, 141.4, 129.1, 127.0, 125.4, 123.0, 110.2, 45.8, 31.2, 29.4, 22.0, 13.7.

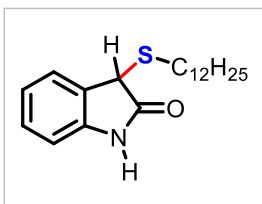

**3-(Dodecylthio) Indolin-2-one(4b)**; General procedure (A) was followed using isatin (**1a**, 29.5 mg, 0.2 mmol) to give a crude mixture which was purified by column chromatography (SiO<sub>2</sub>, Hexane/ethyl acetate = 70/30) to afford the title compound as a light yellow solid (62.5 mg, 94%); mp = 54–56  $^{\circ}$ C; <sup>1</sup>H NMR (400 MHz, CDCl<sub>3</sub>)  $\delta$  9.21 (s, 1H), 7.37 (d,  $J$  = 7.5 Hz, 1H), 7.24 (t,  $J$  = 7.6 Hz, 1H), 7.07 (t,  $J$  = 7.6 Hz, 1H), 6.93 (d,  $J$  = 7.7 Hz, 1H), 4.31 (s, 1H), 2.73 – 2.58 (m, 1H), 2.51 – 2.38 (m, 1H), 1.60 – 1.45 (m, 2H), 1.32 – 1.18 (m, 18H),  $\delta$  0.88 (t,  $J$  = 7.0 Hz, 3H); <sup>13</sup>C{<sup>1</sup>H} NMR (126 MHz, CDCl<sub>3</sub>)  $\delta$  178.7, 141.5, 129.1, 127.0, 125.3, 123.0, 110.3, 45.9, 32.0, 29.75, 29.74, 29.68, 29.6, 29.5, 29.2, 29.1, 28.9, 22.8, 14.2; HRMS (ESI)  $m/z$ : [M+Na]<sup>+</sup> calculated for C<sub>20</sub>H<sub>31</sub>NONaS: 356.2024; found: 356.2029.

**3-(Benzylthio) indolin-2-one (4c)**<sup>3</sup>; General procedure (A) was followed using isatin (1a, 29.5 mg, 0.2

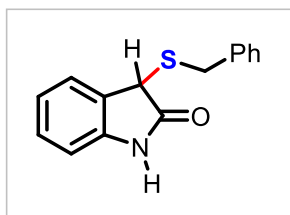

mmol) to give a crude mixture which was purified by column chromatography (SiO<sub>2</sub>, Hexane/ethyl acetate = 70/30) to afford the title compound as a brown solid (46.5 mg, 91%); mp = 69-71 °C; <sup>1</sup>H NMR (500 MHz, CDCl<sub>3</sub>) δ 9.08 (s, 1H), 7.33 (d, *J* = 7.9 Hz, 2H), 7.29 – 7.19 (m, 5H), 7.04 (t, *J* = 8.2 Hz, 1H), 6.91 (d, *J* = 7.6 Hz, 1H), 4.23 (s, 1H), 4.09 (d, *J* = 13.0 Hz, 1H), 3.73 (d, *J* = 13.0 Hz, 1H); <sup>13</sup>C{<sup>1</sup>H} NMR (126 MHz, CDCl<sub>3</sub>) δ 178.5, 141.6, 137.2, 129.4, 129.2, 128.6, 127.4, 126.2, 125.4, 122.9, 110.3, 44.5, 34.3.

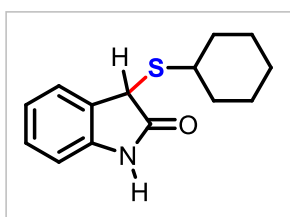

**3-(Cyclohexylthio) indolin-2-one (4d)**<sup>2</sup>; General procedure (A) was followed using isatin (1a, 29.5 mg, 0.2 mmol) to give a crude mixture which was purified by column chromatography (SiO<sub>2</sub>, Hexane/ethyl acetate = 70/30) to afford the title compound as a light yellow solid (48 mg, 97%); mp = 103-105 °C; <sup>1</sup>H NMR (500 MHz, CDCl<sub>3</sub>) δ 9.19 (s, 1H), 7.34 (d, *J* = 7.3 Hz, 1H), 7.22 (t, *J* = 7.8 Hz, 1H), 7.05 (t, *J* = 7.6 Hz, 1H), 6.92 (d, *J* = 7.6 Hz, 1H), 4.37 (s, 1H), 3.16 – 2.91 (m, 1H), 2.06 (d, *J* = 12.7 Hz, 1H), 1.85 – 1.65 (m, 3H), 1.57 (d, *J* = 9.2 Hz, 1H), 1.50 – 1.38 (m, 1H), 1.33 – 1.21 (m, 4H); <sup>13</sup>C{<sup>1</sup>H} NMR (126 MHz, CDCl<sub>3</sub>) δ 178.9, 141.3, 128.9, 127.4, 125.3, 122.9, 110.3, 44.5, 42.7, 34.1, 33.5, 26.0, 25.9, 25.8.

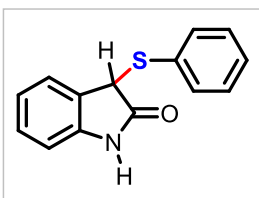

**3-(Phenylsulfanyl) indolin-2-one (4e)**<sup>3</sup>; General procedure (A) was followed using isatin (1a, 29.5 mg, 0.2 mmol) to give a crude mixture which was purified by column chromatography (SiO<sub>2</sub>, Hexane/ethyl acetate = 70/30) to afford the title compound as a light pink solid (45.5 mg, 94%); mp = 131-133 °C; <sup>1</sup>H NMR (400 MHz, CDCl<sub>3</sub>) δ 8.70 (s, 1H), 7.42 – 7.34 (m, 3H), 7.25 – 7.14 (m, 4H), 7.05 (t, *J* = 7.6 Hz, 1H), 6.76 (d, *J* = 7.0 Hz, 1H), 4.58 (s, 1H); <sup>13</sup>C{<sup>1</sup>H} NMR (126 MHz, CDCl<sub>3</sub>) δ 177.0, 141.3, 134.1, 131.1, 129.2, 128.9, 128.7, 126.9, 125.7, 122.9, 110.1, 49.8.

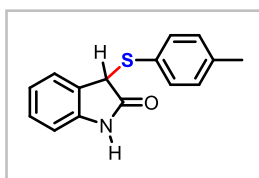

**3-(p-Tolylthio) indolin-2-one (4f)**<sup>4</sup>; General procedure (A) was followed using isatin (1a, 29.5 mg, 0.2 mmol) to give a crude mixture which was purified by column chromatography (SiO<sub>2</sub>, Hexane/ethyl acetate = 70/30) to afford the title compound as a pink solid (46 mg, 90%); mp = 151-153 °C; <sup>1</sup>H NMR (400 MHz, CDCl<sub>3</sub>) δ 8.75 (s, 1H), 7.36 (d, *J* = 7.5 Hz, 1H), 7.26 (d, *J* = 8.2 Hz, 2H), 7.18 (t, *J* = 7.7 Hz, 1H), 7.04 (t, *J* = 7.5 Hz, 1H), 6.97 (d, *J* = 7.8 Hz, 2H), 6.76 (d, *J* = 7.9 Hz, 1H), 4.52 (s, 1H), 2.25 (s, 3H); <sup>13</sup>C{<sup>1</sup>H} NMR (126 MHz, CDCl<sub>3</sub>) δ 177.5, 141.4, 139.0, 134.5, 129.6, 129.0, 127.03, 127.01, 125.4, 122.7, 110.3, 50.1, 21.3.

**3-(*o*-Tolylthio) indolin-2-one (4g)**<sup>3</sup>; General procedure (A) was followed using isatin (**1a**, 29.5 mg, 0.2

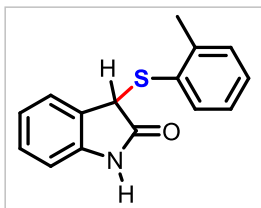

mmol) to give a crude mixture which was purified by column chromatography (SiO<sub>2</sub>, Hexane/ethyl acetate = 75/25) to afford the title compound as a white solid (41 mg, 80%); mp = 59-61 °C; <sup>1</sup>H NMR (500 MHz, CDCl<sub>3</sub>) δ 9.26 (s, 1H), 7.58 (d, *J* = 7.6 Hz, 1H), 7.37 – 7.24 (m, 4H), 7.17 (dt, *J* = 8.7, 4.3 Hz, 1H), 7.11 (t, *J* = 7.6 Hz, 1H), 6.93 (d, *J* = 7.8 Hz, 1H), 4.76 (s, 1H), 2.54 (s, 3H); <sup>13</sup>C{<sup>1</sup>H} NMR (126 MHz, CDCl<sub>3</sub>) δ 177.4, 141.4, 140.9, 133.8, 131.4, 130.5, 129.2, 128.5, 126.8, 126.5, 125.5, 122.8, 110.3, 48.9, 21.1.

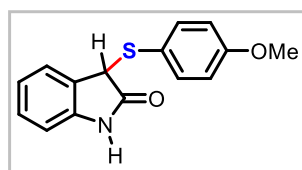

**3-((4-Methoxyphenyl) thio) indolin-2-one (4h)**<sup>3</sup>; General procedure (A) was followed using isatin (**1a**, 29.5 mg, 0.2 mmol) to give a crude mixture which was purified by column chromatography (SiO<sub>2</sub>, Hexane/ethyl acetate = 70/30) to afford the title compound as a pink solid (41 mg, 75%); mp = 141-143 °C; <sup>1</sup>H NMR (500 MHz, CDCl<sub>3</sub>) δ 9.18 (s, 1H), 7.34 (d, *J* = 7.5 Hz, 1H), 7.25 (d, *J* = 8.7 Hz, 2H), 7.14 (t, *J* = 7.8 Hz, 1H), 7.02 (t, *J* = 7.5 Hz, 1H), 6.73 (d, *J* = 7.8 Hz, 1H), 6.62 (d, *J* = 8.7 Hz, 2H), 4.42 (s, 1H), 3.66 (s, 3H); <sup>13</sup>C{<sup>1</sup>H} NMR (126 MHz, CDCl<sub>3</sub>) δ 177.4, 160.5, 141.5, 136.9, 128.9, 127.1, 125.5, 122.7, 120.7, 114.3, 110.2, 55.2, 50.5.

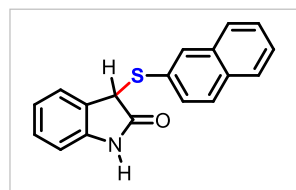

**3-(Naphthalen-2-ylthio) indolin-2-one (4i)**<sup>3</sup>; General procedure (A) was followed using isatin (**1a**, 29.5 mg, 0.2 mmol) to give a crude mixture which was purified by column chromatography (SiO<sub>2</sub>, Hexane/ethyl acetate = 70/30) to afford the title compound as a pink solid (41 mg, 70%); mp = 132-134 °C; <sup>1</sup>H NMR (500 MHz, CDCl<sub>3</sub>) δ 8.35 (s, 1H), 7.90 (s, 1H), 7.74 (d, *J* = 9.2 Hz, 1H), 7.69 – 7.60 (m, 2H), 7.47 – 7.39 (m, 4H), 7.17 (t, *J* = 7.7 Hz, 1H), 7.06 (t, *J* = 7.6 Hz, 1H), 6.70 (d, *J* = 7.8 Hz, 1H), 4.65 (s, 1H); <sup>13</sup>C{<sup>1</sup>H} NMR (126 MHz, CDCl<sub>3</sub>) δ 176.6, 141.3, 133.6, 133.5, 133.0, 130.7, 129.2, 128.6, 128.4, 127.9, 127.7, 126.9, 126.8, 126.5, 125.7, 123.0, 110.1, 49.7.

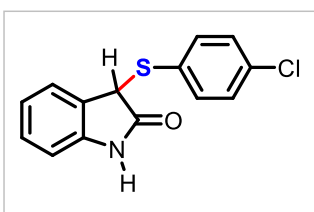

**3-((4-Chlorophenyl) thio) indolin-2-one (4j)**<sup>3</sup>; General procedure (A) was followed using isatin (**1a**, 29.5 mg, 0.2 mmol) to give a crude mixture which was purified by column chromatography (SiO<sub>2</sub>, Hexane/ethyl acetate = 70/30) to afford the title compound as a white solid (36 mg, 65%); mp = 140-142 °C; <sup>1</sup>H NMR (400 MHz, CDCl<sub>3</sub>) δ 8.56 (s, 1H), 7.39 (d, *J* = 7.5 Hz, 1H), 7.31 (d, *J* = 8.6 Hz, 2H), 7.20 (t, *J* = 7.7 Hz, 1H), 7.13 (d, *J* = 8.6 Hz, 2H), 7.07 (t, *J* = 7.0 Hz, 1H), 6.77 (d, *J* = 7.7 Hz, 1H), 4.55 (s, 1H); <sup>13</sup>C{<sup>1</sup>H} NMR (126 MHz, CDCl<sub>3</sub>) δ 176.8, 141.2, 135.6, 135.3, 129.4, 129.2, 129.1, 126.5, 125.6, 123.1, 110.3, 49.8.

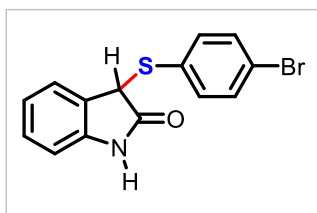

**3-((4-Bromophenyl) thio) indolin-2-one (4k)**<sup>3</sup>; General procedure (A) was followed using isatin (**1a**, 29.5 mg, 0.2 mmol) to give a crude mixture which was purified by column chromatography (SiO<sub>2</sub>, Hexane/ethyl acetate = 70/30) to afford the title compound as a brown solid (42.5 mg, 67%); mp = 154-156 °C; <sup>1</sup>H NMR (500 MHz, CDCl<sub>3</sub>) δ 8.64 (s, 1H),

7.39 (d, *J* = 7.5 Hz, 1H), 7.30 – 7.19 (m, 5H), 7.07 (t, *J* = 7.6 Hz, 1H), 6.78 (d, *J* = 7.8 Hz, 1H), 4.56 (s, 1H); <sup>13</sup>C{<sup>1</sup>H} NMR (126 MHz, CDCl<sub>3</sub>) δ 176.3, 141.2, 135.8, 132.1, 130.1, 129.4, 126.5, 125.7, 123.5, 123.1, 110.1, 49.6.

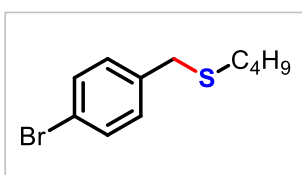

**(4-Bromobenzyl) (butyl)sulfane (4l)**<sup>4</sup>; General procedure (A) was followed using 4-bromobenzaldehyde (37mg, 0.2, mmol) to give a crude mixture which was purified by column chromatography (SiO<sub>2</sub>, Hexane/ethyl acetate = 97/3) to afford the title compound as a colourless

viscous (50 mg, 97%); <sup>1</sup>H NMR (400 MHz, CDCl<sub>3</sub>) δ 7.42 (d, *J* = 8.4 Hz, 2H), 7.18 (d, *J* = 8.4 Hz, 2H), 3.64 (s, 2H), 2.44 – 2.32 (m, 2H), 1.57 – 1.48 (m, 2H), 1.45 – 1.30 (m, 2H), 0.88 (t, *J* = 7.3 Hz, 3H); <sup>13</sup>C{<sup>1</sup>H} NMR (126 MHz, CDCl<sub>3</sub>) δ 137.9, 131.6, 130.6, 120.8, 35.8, 31.4, 31.2, 22.1, 13.8.

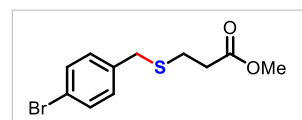

**Methyl 3-((4-bromobenzyl) thio) propanoate (4m)**; General procedure (A) was followed using 4-bromobenzaldehyde (37mg, 0.2 mmol) to give a crude mixture which was purified by column chromatography (SiO<sub>2</sub>,

Hexane/ethyl acetate = 95/5) to afford the title compound as a colourless viscous (53.5 mg, 93%); <sup>1</sup>H NMR (500 MHz, CDCl<sub>3</sub>) δ 7.43 (d, *J* = 8.4 Hz, 2H), 7.19 (d, *J* = 8.4 Hz, 2H), 3.68 (s, 3H), 3.67 (s, 2H), 2.67 (t, *J* = 7.3 Hz, 2H), 2.55 (t, *J* = 6.9 Hz, 2H); <sup>13</sup>C{<sup>1</sup>H} NMR (126 MHz, CDCl<sub>3</sub>) δ 172.3, 137.3, 131.8, 130.6, 121.1, 51.9, 35.8, 34.4, 26.3; HRMS (ESI) *m/z*: [M+Na]<sup>+</sup> calculated for C<sub>11</sub>H<sub>13</sub>Br<sup>79</sup>NaO<sub>2</sub>S: 310.9711; found: 310.9714.

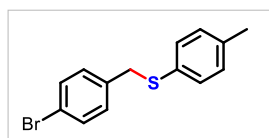

**(4-Bromobenzyl) (p-tolyl) sulfane (4n)**<sup>5</sup>; General procedure (A) was followed using 4-bromobenzaldehyde (37mg, 0.2 mmol) to give a crude mixture which was purified by column chromatography (SiO<sub>2</sub>, Hexane/ethyl

acetate = 97/3) to afford the title compound as a white sticky (55.5 mg, 95%); <sup>1</sup>H NMR (500 MHz, CDCl<sub>3</sub>) δ 7.23 (d, *J* = 8.5 Hz, 2H), 7.06 (d, *J* = 8.2 Hz, 2H), 6.96 (d, *J* = 8.4 Hz, 2H), 6.92 (d, *J* = 8.2 Hz, 2H), 3.84 (s, 2H), 2.17 (s, 3H); <sup>13</sup>C{<sup>1</sup>H} NMR (126 MHz, CDCl<sub>3</sub>) δ 137.0, 136.9, 131.8, 131.5, 131.1, 130.5, 129.7, 121.0, 39.3, 21.1.

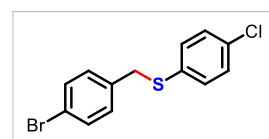

**(4-Bromobenzyl) (4-chlorophenyl) sulfane (4o)**<sup>5</sup>; General procedure (A) was followed using 4-bromobenzaldehyde (37mg, 0.2 mmol) to give a crude mixture which was purified by column chromatography (SiO<sub>2</sub>, Hexane/ethyl

acetate = 97/3) to afford the title compound as a white solid (58mg, 93%); mp = 82-84 °C; <sup>1</sup>H NMR

(500 MHz, CDCl<sub>3</sub>)  $\delta$  7.40 (d,  $J$  = 8.4 Hz, 2H), 7.24 – 7.17 (m, 4H), 7.11 (d,  $J$  = 8.4 Hz, 2H), 4.00 (s, 2H); <sup>13</sup>C{<sup>1</sup>H} NMR (126 MHz, CDCl<sub>3</sub>)  $\delta$  136.5, 134.1, 133.0, 132.0, 131.8, 130.6, 129.2, 121.3, 39.0.

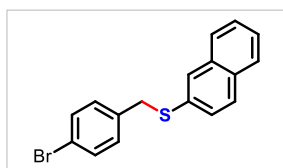

**(4-Bromobenzyl) (naphthalen-2-yl) sulfane (4p)**<sup>5</sup>; General procedure (A) was followed using 4-bromobenzaldehyde (37mg, 0.2 mmol) to give a crude mixture which was purified by column chromatography (SiO<sub>2</sub>, Hexane/ethyl acetate = 95/5) to afford the title compound as a white solid (62 mg, 94%); mp = 87-89 °C; <sup>1</sup>H NMR (500 MHz, CDCl<sub>3</sub>)  $\delta$  7.79 (d,  $J$  = 7.3 Hz, 1H), 7.76 – 7.72 (m, 2H), 7.70 (s, 1H), 7.51 – 7.43 (m, 2H), 7.45 – 7.35 (m, 3H), 7.18 (d,  $J$  = 8.5 Hz, 2H), 4.15 (s, 2H); <sup>13</sup>C{<sup>1</sup>H} NMR (126 MHz, CDCl<sub>3</sub>)  $\delta$  136.7, 133.8, 133.3, 132.1, 131.7, 130.6, 128.6, 128.4, 128.0, 127.8, 127.3, 126.7, 126.1, 121.2, 38.6.

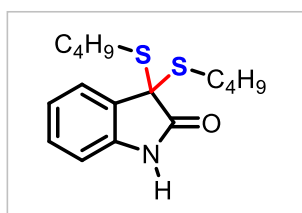

**3,3-Bis (butylthio) indolin-2-one (5a)**<sup>2</sup>; General procedure (A) was followed using isatin (1a, 29.5 mg, 0.2 mmol) to give a crude mixture which was purified by column chromatography (SiO<sub>2</sub>, Hexane/ethyl acetate = 90/10) to afford the title compound as a white solid (28 mg, 45%); mp = 82-84 °C; <sup>1</sup>H NMR (400 MHz, CDCl<sub>3</sub>)  $\delta$  8.74 (s, 1H), 7.41 (d,  $J$  = 7.6 Hz, 1H), 7.29 – 7.24 (m, 1H), 7.10 (t,  $J$  = 8.2 Hz, 1H), 6.94 (d,  $J$  = 7.7 Hz, 1H), 2.77 – 2.61 (m, 4H), 1.48 (p,  $J$  = 7.2 Hz, 4H), 1.40 – 1.28 (m, 4H), 0.84 (t,  $J$  = 7.3 Hz, 6H); <sup>13</sup>C{<sup>1</sup>H} NMR (126 MHz, CDCl<sub>3</sub>)  $\delta$  176.7, 139.3, 129.8, 129.6, 125.0, 123.3, 110.3, 57.0, 30.9, 30.0, 22.1, 13.7.

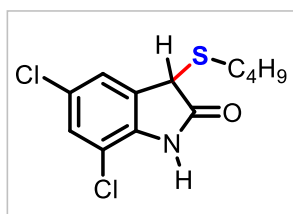

**3-(Butylthio)-5,7-dichloroindolin-2-one (6a)**; General procedure (A) was followed using 5,7-dichloroindoline-2,3-dione (43mg, 0.2 mmol) to give a crude mixture which was purified by column chromatography (SiO<sub>2</sub>, Hexane/ethyl acetate = 70/30) to afford the title compound as a white solid (56 mg, 96%); mp = 145-147 °C; <sup>1</sup>H NMR (500 MHz, CDCl<sub>3</sub>)  $\delta$  9.03 (s, 1H), 7.26 (s, 2H), 4.37 (s, 1H), 2.79 – 2.68 (m, 1H), 2.59 – 2.46 (m, 1H), 1.59 – 1.51 (m, 2H), 1.44 – 1.33 (m, 2H), 0.87 (t,  $J$  = 7.3 Hz, 3H); <sup>13</sup>C{<sup>1</sup>H} NMR (126 MHz, CDCl<sub>3</sub>)  $\delta$  176.8, 137.9, 129.6, 128.8, 128.7, 124.2, 115.7, 46.2, 31.0, 29.8, 22.0, 13.7; HRMS (ESI) m/z: [M+Na]<sup>+</sup> calculated for C<sub>12</sub>H<sub>13</sub>ONCl<sub>2</sub><sup>35</sup>NaS: 311.9993; found: 311.9995;  $\nu_{\text{max}}$  (cm<sup>-1</sup>) 3382, 3142, 3064, 2960, 2928, 2861, 1709, 1619, 1588, 1463.

**3-(Butylthio)-5-chloroindolin-2-one (6b)**<sup>2</sup>; General procedure (A) was followed using 5-chloroindoline-2,3-dione (36.2mg, 0.2 mmol) to give a crude mixture of which was purified by column chromatography (SiO<sub>2</sub>, Hexane/ethyl acetate = 70/30) to afford the title compound as a white solid (49 mg, 96%); mp = 82-84 °C; <sup>1</sup>H NMR (500 MHz, CDCl<sub>3</sub>)  $\delta$  9.49 (s, 1H), 7.35 (s, 1H), 7.22 (d,  $J$  = 8.2 Hz, 1H), 6.86 (d,  $J$  = 8.4 Hz, 1H), 4.29 (s, 1H), 2.71 – 2.61 (m, 1H), 2.51 – 2.41 (m, 1H),

1.57 – 1.47 (m, 2H), 1.41 – 1.32 (m, 2H), 0.85 (t,  $J = 7.3$  Hz, 3H);  $^{13}\text{C}\{^1\text{H}\}$  NMR (126 MHz,  $\text{CDCl}_3$ )  $\delta$  178.4, 139.9, 129.1, 128.8, 128.5, 125.7, 111.3, 45.9, 31.1, 29.5, 22.0, 13.7;  $\nu_{\text{max}}$  ( $\text{cm}^{-1}$ ) 3167, 2928, 2861, 1714, 1617, 1475, 1385, 1298, 1187, 1114.

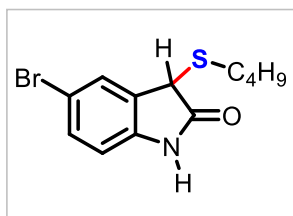

**5-Bromo-3-(butylthio) indolin-2-one (6c)**; General procedure (A) was followed using 5-bromoindoline-2,3-dione (45.2mg, 0.2 mmol) to give a crude mixture which was purified by column chromatography ( $\text{SiO}_2$ , Hexane/ethyl acetate = 70/30) to afford the title compound as a white sticky (57 mg, 95%);  $^1\text{H}$  NMR (400 MHz,  $\text{CDCl}_3$ )  $\delta$  8.53 (s, 1H), 7.50 (s, 1H),

7.38 (d,  $J = 9.2$  Hz, 1H), 6.79 (d,  $J = 8.3$  Hz, 1H), 4.29 (s, 1H), 2.76 – 2.63 (m, 1H), 2.56 – 2.45 (m, 1H), 1.58 – 1.48 (m, 2H), 1.45 – 1.32 (m, 2H), 0.87 (t,  $J = 7.3$  Hz, 3H);  $^{13}\text{C}\{^1\text{H}\}$  NMR (126 MHz,  $\text{CDCl}_3$ )  $\delta$  178.4, 140.5, 132.0, 129.1, 128.4, 115.6, 111.8, 45.8, 31.0, 29.5, 22.0, 13.7. **HRMS** (ESI):  $[\text{M}+\text{Na}]^+$  calculated for  $\text{C}_{12}\text{H}_{14}\text{NNaOS Br}^{79}$ : 321.9877; found: 321.9879.

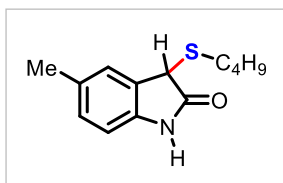

**3-(Butylthio)-5-methylindolin-2-one (6d)**<sup>2</sup>; General procedure (A) was followed using 5-methylindoline-2,3-dione (32.2mg, 0.2 mmol) to give a crude mixture which was purified by column chromatography ( $\text{SiO}_2$ , Hexane/ethyl acetate = 70/30) to afford the title compound as a pink sticky (44 mg, 94%);  $^1\text{H}$  NMR (500 MHz,  $\text{CDCl}_3$ )  $\delta$  9.11 (s, 1H), 7.18 (s, 1H), 7.03 (d,  $J = 7.9$  Hz, 1H), 6.80

(d,  $J = 7.9$  Hz, 1H), 4.26 (s, 1H), 2.72 – 2.61 (m, 1H), 2.51 – 2.42 (m, 1H), 2.32 (s, 3H), 1.55 – 1.47 (m, 2H), 1.40 – 1.30 (m, 2H), 0.84 (t,  $J = 7.3$  Hz, 3H);  $^{13}\text{C}\{^1\text{H}\}$  NMR (126 MHz,  $\text{CDCl}_3$ )  $\delta$  178.5, 139.0, 132.5, 129.4, 127.0, 126.0, 110.0, 45.9, 31.2, 29.4, 22.0, 21.2, 13.7.

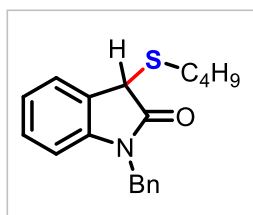

**1-Benzyl-3-(butylthio) indolin-2-one (6e)**; General procedure (A) was followed using 1-benzylindoline-2,3-dione (74.4mg, 0.2 mmol) to give a crude mixture which was purified by column chromatography ( $\text{SiO}_2$ , Hexane/ethyl acetate = 70/30) to afford the title compound as a brown sticky (44 mg, 78%);

$^1\text{H}$  NMR (400 MHz,  $\text{CDCl}_3$ )  $\delta$  7.38 (d,  $J = 7.5$  Hz, 1H), 7.33 – 7.22 (m, 5H), 7.18 (t,  $J = 7.2$  Hz, 1H), 7.04 (t,  $J = 7.5$  Hz, 1H), 6.72 (d,  $J = 7.8$  Hz, 1H), 4.97 (d,  $J = 15.5$  Hz, 1H), 4.85 (d,  $J = 15.5$  Hz, 1H), 4.37 (s, 1H), 2.82 – 2.70 (m, 1H), 2.60 – 2.48 (m, 1H), 1.60 – 1.47 (m, 2H), 1.43 – 1.30 (m, 2H), 0.86 (t,  $J = 7.3$  Hz, 3H);  $^{13}\text{C}\{^1\text{H}\}$  NMR (126 MHz,  $\text{CDCl}_3$ )  $\delta$  175.7, 143.1, 135.7, 128.9, 128.8, 127.7, 127.4, 126.2, 125.1, 122.9, 109.2, 44.7, 44.0, 31.2, 29.5, 22.0, 13.6; **HRMS** (ESI)  $m/z$ :  $[\text{M}+\text{Na}]^+$  calculated for  $\text{C}_{19}\text{H}_{21}\text{NNaOS}$ : 334.1242; found: 334.1245.

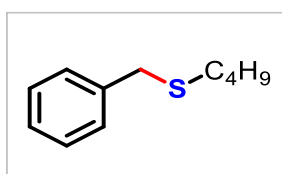

**Benzyl(butyl)sulfane (6f)**<sup>4</sup>; General procedure (A) was followed using benzaldehyde (0.2 mmol) to give a crude mixture which was purified by column chromatography ( $\text{SiO}_2$ , Hexane/ethyl acetate = 97/3) to afford the title compound as a colorless viscous (30 mg, 82%);  $^1\text{H}$  NMR (500 MHz,



$\text{CDCl}_3$ )  $\delta$  7.26 (d,  $J = 4.0$  Hz, 4H), 7.21 – 7.15 (m, 1H), 3.65 (s, 2H), 2.43 – 2.27 (m, 2H), 1.48 (dd,  $J = 15.3, 7.6$  Hz, 2H), 1.32 (h,  $J = 7.2$  Hz, 2H), 0.83 (t,  $J = 7.3$  Hz, 3H);  $^{13}\text{C}\{^1\text{H}\}$  NMR (126 MHz,  $\text{CDCl}_3$ )  $\delta$  138.8, 129.0, 128.6, 127.0, 36.4, 31.4, 31.2, 22.1, 13.8.

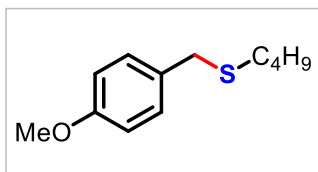

**Butyl(4-methoxybenzyl) sulfane (6g)**<sup>4</sup>; General procedure (A) was followed using 4-methoxybenzaldehyde (0.2 mmol) to give a crude mixture which was purified by column chromatography ( $\text{SiO}_2$ , Hexane/ethyl acetate = 95/5) to afford the title compound as a colorless viscous (33 mg, 78%);  $^1\text{H}$  NMR (400 MHz,  $\text{CDCl}_3$ )  $\delta$  7.23 (d,  $J = 8.7$  Hz, 2H), 6.85 (d,  $J = 8.7$  Hz, 2H), 3.80 (s, 3H), 3.67 (s, 2H), 2.48 – 2.31 (m, 2H), 1.62 – 1.49 (m, 2H), 1.45 – 1.31 (m, 2H), 0.89 (t,  $J = 7.3$  Hz, 3H);  $^{13}\text{C}\{^1\text{H}\}$  NMR (126 MHz,  $\text{CDCl}_3$ )  $\delta$  158.6, 130.8, 130.0, 114.0, 55.4, 35.8, 31.5, 31.1, 22.1, 13.8.

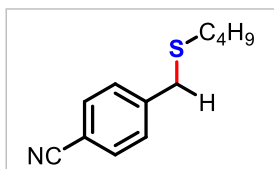

**4-((Butylthio)methyl) benzonitrile (6h)**<sup>4</sup>; General procedure (A) was followed using 4-formylbenzonitrile (0.2 mmol) to give a crude mixture which was purified by column chromatography ( $\text{SiO}_2$ , Hexane/ethyl acetate = 80/20) to afford the title compound as a colorless viscous (37 mg, 90%);  $^1\text{H}$  NMR (400 MHz,  $\text{CDCl}_3$ )  $\delta$  7.59 (d,  $J = 8.4$  Hz, 2H), 7.42 (d,  $J = 8.6$  Hz, 2H), 3.71 (s, 2H), 2.45 – 2.32 (m, 2H), 1.58 – 1.45 (m, 2H), 1.43 – 1.28 (m, 2H) 0.87 (t,  $J = 7.3$  Hz, 3H);  $^{13}\text{C}\{^1\text{H}\}$  NMR (126 MHz,  $\text{CDCl}_3$ )  $\delta$  144.6, 132.4, 129.7, 118.9, 110.9, 36.2, 31.4, 31.3, 22.0, 13.7.

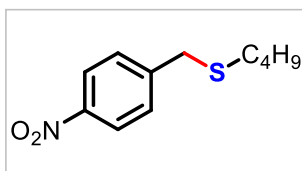

**Butyl(4-nitrobenzyl) sulfane (6i)**<sup>4</sup>; General procedure (A) was followed using 4-nitrobenzaldehyde (0.2 mmol) to give a crude mixture which was purified by column chromatography ( $\text{SiO}_2$ , Hexane/ethyl acetate = 95/5) to afford the title compound as a colorless viscous (44 mg, 98%);  $^1\text{H}$  NMR (400 MHz,  $\text{CDCl}_3$ )  $\delta$  8.17 (d,  $J = 8.8$  Hz, 2H), 7.48 (d,  $J = 6.7$  Hz, 2H), 3.77 (s, 2H), 2.46 – 2.37 (m, 2H), 1.59 – 1.48 (m, 2H), 1.43 – 1.28 (m, 2H), 0.88 (t,  $J = 7.3$  Hz, 3H);  $^{13}\text{C}\{^1\text{H}\}$  NMR (126 MHz,  $\text{CDCl}_3$ )  $\delta$  147.0, 146.7, 129.7, 123.8, 35.8, 31.3, 31.2, 22.0, 13.7.

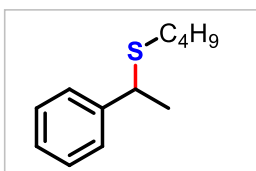

**Butyl(1-phenylethyl) sulfane (6j)**<sup>6</sup>; General procedure (A) was followed using acetophenone (0.2 mmol) to give a crude mixture which was purified by column chromatography ( $\text{SiO}_2$ , Hexane/ethyl acetate = 95/5) to afford the title compound as a colorless viscous (30.5 mg, 78%);  $^1\text{H}$  NMR (500 MHz,  $\text{CDCl}_3$ )  $\delta$  7.39 – 7.32 (m, 4H), 7.26 (t,  $J = 6.9$  Hz, 1H), 3.98 (q,  $J = 7.0$  Hz, 1H), 2.49 – 2.18 (m, 2H), 1.60 (d,  $J = 7.2$  Hz, 3H), 1.55 – 1.45 (m, 2H), 1.41 – 1.32 (m, 2H), 0.88 (t,  $J = 7.3$  Hz, 3H);  $^{13}\text{C}\{^1\text{H}\}$  NMR (126 MHz,  $\text{CDCl}_3$ )  $\delta$  144.4, 128.6, 127.4, 127.1, 44.2, 31.6, 31.1, 22.8, 22.2, 13.8.

**(1-(4-Bromophenyl) ethyl) (butyl)sulfane (6k)**<sup>6</sup>; General procedure (A) was followed using 1-(4-

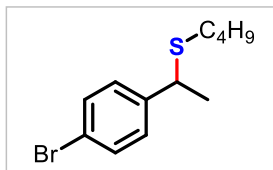

bromophenyl)ethan-1-one (0.2 mmol) to give a crude mixture which was purified by column chromatography (SiO<sub>2</sub>, Hexane/ethyl acetate = 95/5) to afford the title compound as a colorless viscous (44 mg, 81%); <sup>1</sup>H NMR (400 MHz, CDCl<sub>3</sub>) δ 7.43 (d, *J* = 8.6 Hz, 2H), 7.22 (d, *J* = 8.4 Hz, 2H), 3.90 (q, *J* = 7.0 Hz, 1H), 2.36 – 2.16 (m, 2H), 1.53 (d, *J* = 7.1 Hz, 3H), 1.50 – 1.42 (m, 2H), 1.37 – 1.26 (m, 2H), 0.85 (t, *J* = 7.3 Hz, 3H); <sup>13</sup>C{<sup>1</sup>H} NMR (126 MHz, CDCl<sub>3</sub>) δ 143.5, 131.6, 129.1, 120.7, 43.6, 31.5, 31.1, 22.7, 22.1, 13.8.

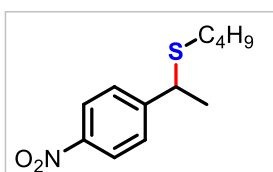

**Butyl(1-(4-nitrophenyl) ethyl) sulfane (6l)**<sup>6</sup>; General procedure (A) was followed using 1-(4-nitrophenyl)ethan-1-one (0.2 mmol) to give a crude mixture which was purified by column chromatography (SiO<sub>2</sub>, Hexane/ethyl acetate = 95/5) to afford the title compound as a colorless viscous (41.5 mg, 86%); <sup>1</sup>H NMR (400 MHz, CDCl<sub>3</sub>) δ 8.16 (d, *J* = 11.4 Hz, 2H), 7.51 (s, 2H), 4.01 (q, *J* = 7.1 Hz, 1H), 2.38 – 2.19 (m, 2H), 1.57 (d, *J* = 7.1 Hz, 3H), 1.51 – 1.39 (m, 2H), 1.38 – 1.22 (m, 2H), 0.83 (t, *J* = 7.3 Hz, 3H); <sup>13</sup>C{<sup>1</sup>H} NMR (126 MHz, CDCl<sub>3</sub>) δ 152.3, 147.0, 128.2, 123.9, 43.7, 31.4, 31.1, 22.4, 22.0, 13.7.

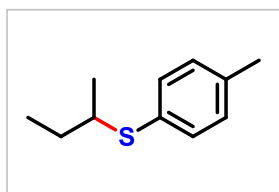

**Sec-butyl(*p*-tolyl) sulfane (6n)**<sup>7</sup>; General procedure (A) was followed using butane-2-one (0.2 mmol) to give a crude mixture which was purified by column chromatography (SiO<sub>2</sub>, Hexane) to afford the title compound as a colorless viscous (34 mg, 94%); <sup>1</sup>H NMR (500 MHz, CDCl<sub>3</sub>) δ 7.31 (d, *J* = 8.1 Hz, 2H), 7.10 (d, *J* = 7.8 Hz, 2H), 3.08 (h, *J* = 6.8 Hz, 1H), 2.33 (s, 3H), 1.68 – 1.60 (m, 1H), 1.51 (dt, *J* = 13.9, 7.2 Hz, 1H), 1.25 (d, *J* = 6.7 Hz, 3H), 1.00 (t, *J* = 7.4 Hz, 3H); <sup>13</sup>C{<sup>1</sup>H} NMR (126 MHz, CDCl<sub>3</sub>) δ 137.0, 132.9, 131.7, 129.7, 45.5, 29.6, 21.2, 20.7, 11.6.

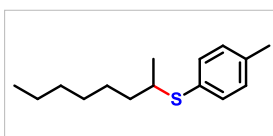

**Octan-2-yl(*p*-tolyl) sulfane (6o)**<sup>7</sup>; General procedure (A) was followed using octan-2-one (0.2 mmol) to give a crude mixture which was purified by column chromatography (SiO<sub>2</sub>, Hexane) to afford the title compound as a colorless viscous (43.5 mg, 92%); <sup>1</sup>H NMR (500 MHz, CDCl<sub>3</sub>) δ 7.27 (d, *J* = 8.1 Hz, 2H), 7.06 (d, *J* = 8.1 Hz, 2H), 3.08 (q, *J* = 6.6 Hz, 1H), 2.29 (s, 3H), 1.61 – 1.50 (m, 1H), 1.47 – 1.35 (m, 3H), 1.30 – 1.16 (m, 9H), 0.84 (t, *J* = 6.9 Hz, 3H); <sup>13</sup>C{<sup>1</sup>H} NMR (126 MHz, CDCl<sub>3</sub>) δ 136.9, 132.9, 131.7, 129.6, 43.9, 36.8, 31.9, 29.3, 27.2, 22.8, 21.3, 21.2, 14.2.

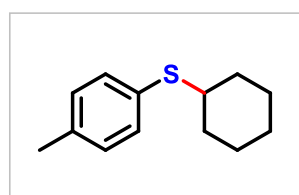

**Cyclohexyl(*p*-tolyl) sulfane (6p)**<sup>8</sup>; General procedure (A) was followed using cyclohexanone (0.2 mmol) to give a crude mixture which was purified by column chromatography (SiO<sub>2</sub>, Hexane) to afford the title compound as a colorless viscous (39 mg, 95%); <sup>1</sup>H NMR (400 MHz, CDCl<sub>3</sub>) δ 7.33 (d,

$J = 8.2$  Hz, 2H), 7.11 (d,  $J = 7.7$  Hz, 2H), 3.12 – 2.81 (m, 1H), 2.34 (s, 3H), 1.98 (d,  $J = 12.7$  Hz, 2H), 1.83 – 1.70 (m, 2H), 1.61 (dd,  $J = 11.4, 4.3$  Hz, 1H), 1.43 – 1.16 (m, 5H);  $^{13}\text{C}\{^1\text{H}\}$  NMR (126 MHz,  $\text{CDCl}_3$ )  $\delta$  137.0, 132.9, 131.3, 129.6, 47.2, 33.5, 26.2, 25.9, 21.2.

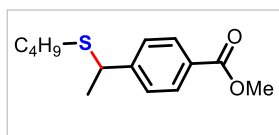

**Methyl 4-(1-(butylthio) ethyl) benzoate (6q)**; General procedure (A) was followed using methyl 4-acetylbenzoate (0.2 mmol) to give a crude mixture which was purified by column chromatography ( $\text{SiO}_2$ , Hexane/ethyl acetate = 90/10) to afford the title compound as a colorless viscous (48 mg, 95%);  $^1\text{H}$  NMR (500 MHz,  $\text{CDCl}_3$ )  $\delta$  7.98 (d,  $J = 8.4$  Hz, 2H), 7.41 (d,  $J = 8.4$  Hz, 2H), 3.97 (q,  $J = 7.0$  Hz, 1H), 3.91 (s, 3H), 2.36 – 2.20 (m, 2H), 1.56 (d,  $J = 7.2$  Hz, 3H), 1.49 – 1.40 (m, 2H), 1.35 – 1.25 (m, 2H), 0.83 (t,  $J = 7.3$  Hz, 3H);  $^{13}\text{C}$  NMR (126 MHz,  $\text{CDCl}_3$ )  $\delta$  167.1, 149.9, 130.0, 129.0, 127.4, 52.2, 44.0, 31.5, 31.1, 22.5, 22.1, 13.8; HRMS (ESI)  $m/z$ :  $[\text{M}+\text{Na}]^+$  calculated for  $\text{C}_{14}\text{H}_{20}\text{SNaO}_2$  275.1076; found: 275.1063.

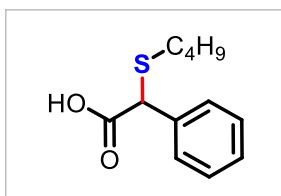

**2-(Butylthio)-2-phenylacetic acid (6r)**; General procedure (A) was followed using 2-oxo-2-phenylacetic acid (0.2 mmol) to give a crude mixture which was purified by column chromatography ( $\text{SiO}_2$ , DCM/MeOH = 95/5) to afford the title compound as a white sticky (35 mg, 78%);  $^1\text{H}$  NMR (400 MHz,  $\text{CDCl}_3$ )  $\delta$  9.80 (s, 1H), 7.48 – 7.44 (m, 2H), 7.36 – 7.29 (m, 3H), 4.56 (s, 1H), 2.66 – 2.32 (m, 2H), 1.60 – 1.50 (m, 2H), 1.37 (h,  $J = 7.3$  Hz, 2H), 0.87 (t,  $J = 7.3$  Hz, 3H);  $^{13}\text{C}\{^1\text{H}\}$  NMR (126 MHz,  $\text{CDCl}_3$ )  $\delta$  177.1, 135.7, 128.8, 128.7, 128.5, 52.2, 32.0, 31.1, 22.0, 13.7; HRMS (ESI)  $m/z$ :  $[\text{M}+\text{Na}]^+$  calculated for  $\text{C}_{12}\text{H}_{16}\text{SNaO}_2$ : 247.0763; found: 247.0764;  $\nu_{\text{max}}$  ( $\text{cm}^{-1}$ ) 3030, 2958, 2928, 2868, 2676, 1709, 1493, 1455, 1411, 1286, 1222, 1179, 1075.

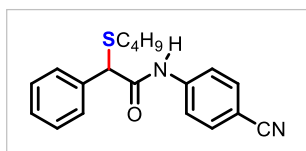

**2-(Butylthio)-N-(4-cyanophenyl)-2-phenylacetamide (6s)**; General procedure (A) was followed using *N*-(4-cyanophenyl)-2-oxo-2-phenylacetamide (0.2 mmol) to give a crude mixture which was purified by column chromatography ( $\text{SiO}_2$ , Hexane/ethyl acetate = 80/20) to afford the title compound as a white solid (61mg, 94%); mp = 82–84 °C;  $^1\text{H}$  NMR (500 MHz,  $\text{CDCl}_3$ )  $\delta$  8.91 (s, 1H), 7.70 (d,  $J = 8.7$  Hz, 2H), 7.61 (d,  $J = 8.7$  Hz, 2H), 7.41 (d,  $J = 8.4$  Hz, 2H), 7.34 (dt,  $J = 14.6, 7.1$  Hz, 3H), 4.69 (s, 1H), 2.72 – 2.53 (m, 2H), 1.69 – 1.57 (m, 2H), 1.50 – 1.35 (m, 2H), 0.90 (t,  $J = 7.3$  Hz, 3H);  $^{13}\text{C}\{^1\text{H}\}$  NMR (126 MHz,  $\text{CDCl}_3$ )  $\delta$  168.9, 141.6, 136.2, 133.4, 129.2, 128.6, 128.0, 119.6, 118.8, 107.6, 56.0, 32.7, 31.1, 22.0, 13.7; HRMS (ESI)  $m/z$   $[\text{M}+\text{Na}]^+$ : calculated for  $\text{C}_{19}\text{H}_{20}\text{N}_2\text{NaOS}$ : 347.1194; found: 347.1194;  $\nu_{\text{max}}$  ( $\text{cm}^{-1}$ ) 3274, 2924, 2860, 2226, 1673, 1585, 1496, 1406, 1314, 1248.

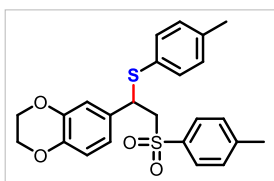

**6-(1-(*p*-Tolylthio)-2-tosylethyl)-2,3-dihydrobenzo[b][1,4]dioxine (6t)**; General procedure (A) was followed using *N*-(4-cyanophenyl)-2-oxo-2-phenylacetamide (0.2 mmol) to give a crude mixture which was purified by column chromatography ( $\text{SiO}_2$ , Hexane/ethyl acetate = 80/20) to afford the

title compound as a white sticky (75 mg, 85%);  $^1\text{H NMR}$  (500 MHz,  $\text{CDCl}_3$ )  $\delta$  7.43 (d,  $J = 8.2$  Hz, 2H), 7.20 (d,  $J = 8.1$  Hz, 2H), 7.13 (d,  $J = 8.2$  Hz, 2H), 7.08 (d,  $J = 8.1$  Hz, 2H), 6.67 – 6.48 (m, 3H), 4.46 (dd,  $J = 10.7, 3.7$  Hz, 1H), 4.22 – 4.14 (m, 4H), 3.72 (dd,  $J = 14.7, 10.8$  Hz, 1H), 3.56 (dd,  $J = 14.6, 3.5$  Hz, 1H), 2.38 (s, 3H), 2.33 (s, 3H);  $^{13}\text{C}\{^1\text{H}\}$  NMR (126 MHz,  $\text{CDCl}_3$ )  $\delta$  144.2, 143.4, 138.7, 136.6, 133.7, 130.7, 130.1, 129.48, 129.45, 128.1, 121.3, 117.3, 116.8, 64.4, 64.4, 60.9, 47.3, 21.7, 21.3; **HRMS** (ESI)  $m/z$ :  $[\text{M}+\text{Na}]^+$  calculated for  $\text{C}_{24}\text{H}_{24}\text{S}_2\text{O}_4\text{Na}$ : 463.1008; found: 463.0994.

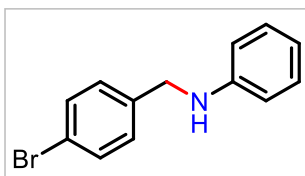

***N*-(4-Bromobenzyl) aniline (4aa)**<sup>9</sup>; General procedure (A) was followed using 4-bromobenzaldehyde (37mg, 0.2 mmol) to give a crude mixture which was purified by column chromatography ( $\text{SiO}_2$ , Hexane/ethyl acetate = 90/10) to afford the title compound as a light yellow sticky (47.5 mg, 91%);  $^1\text{H NMR}$  (500 MHz,  $\text{CDCl}_3$ )  $\delta$  7.43 (d,  $J = 8.4$  Hz, 2H), 7.21 (d,  $J = 8.5$  Hz, 2H), 7.15 (t,  $J = 8.0$  Hz, 2H), 6.71 (t,  $J = 7.3$  Hz, 1H), 6.58 (d,  $J = 7.6$  Hz, 2H), 4.25 (s, 2H), 4.02 (s, 1H);  $^{13}\text{C NMR}$  (126 MHz,  $\text{CDCl}_3$ )  $\delta$  147.9, 138.7, 131.8, 129.4, 129.2, 121.0, 117.9, 113.0, 47.8.

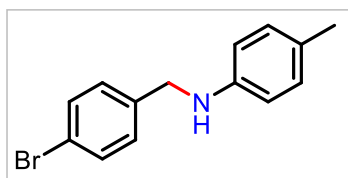

***N*-(4-Bromobenzyl)-4-methylaniline (4ab)**<sup>9</sup>; General procedure (A) was followed using 4-bromobenzaldehyde (37mg, 0.2 mmol) to give a crude mixture which was purified by column chromatography ( $\text{SiO}_2$ , Hexane/ethyl acetate = 90/10) to afford the title compound as a light yellow solid (52.5 mg, 95%); mp = 59-61 °C;  $^1\text{H NMR}$  (500 MHz,  $\text{CDCl}_3$ )  $\delta$  7.44 (d,  $J = 8.4$  Hz, 2H), 7.23 (d,  $J = 8.4$  Hz, 2H), 6.98 (d,  $J = 8.4$  Hz, 2H), 6.53 (d,  $J = 8.4$  Hz, 2H), 4.26 (s, 2H), 2.23 (s, 3H);  $^{13}\text{C NMR}$  (126 MHz,  $\text{CDCl}_3$ )  $\delta$  145.6, 138.8, 131.8, 129.9, 129.2, 127.2, 121.0, 113.2, 48.1, 20.5.

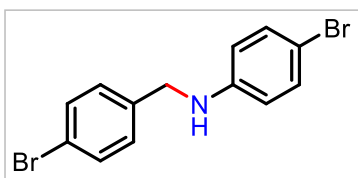

**4-Bromo-*N*-(4-bromobenzyl) aniline (4ac)**<sup>9</sup>; General procedure (A) was followed using 4-bromobenzaldehyde (37mg, 0.2 mmol) to give a crude mixture which was purified by column chromatography ( $\text{SiO}_2$ , Hexane/ethyl acetate = 90/10) to afford the title compound as a white solid (66 mg, 97%); mp = 101-103 °C;  $^1\text{H NMR}$  (500 MHz,  $\text{CDCl}_3$ )  $\delta$  7.46 (d,  $J = 8.4$  Hz, 2H), 7.28 – 7.19 (m, 4H), 6.47 (d,  $J = 8.9$  Hz, 2H), 4.26 (s, 2H), 4.11 (s, 1H);  $^{13}\text{C NMR}$  (126 MHz,  $\text{CDCl}_3$ )  $\delta$  146.8, 138.1, 132.1, 131.9, 129.1, 121.2, 114.6, 109.6, 47.7; **HRMS** (ESI)  $m/z$ :  $[\text{M}+\text{H}]^+$  calculated for  $\text{C}_{13}\text{H}_{12}\text{NBr}^{79}\text{Br}^{79}$ : 339.9337; found: 339.9328.

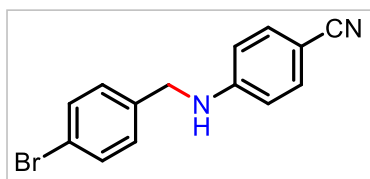

**4-((4-Bromobenzyl)amino)benzonitrile (4ad)**<sup>9</sup>; General procedure (A) was followed using 4-bromobenzaldehyde (37mg, 0.2 mmol) to give a crude mixture which was purified by column chromatography ( $\text{SiO}_2$ , Hexane/ethyl acetate = 80/20) to afford the title compound as a white solid (40 mg, 69%); mp = 109-111 °C;  $^1\text{H NMR}$  (500 MHz,  $\text{CDCl}_3$ )  $\delta$  7.47 (d,  $J = 8.4$  Hz, 2H), 7.40 (d,  $J = 8.9$  Hz, 2H), 7.20 (d,  $J = 8.5$  Hz, 2H), 6.56 (d,  $J = 8.9$  Hz, 2H), 4.65 (s, 1H), 4.34 (d,

$J = 5.8$  Hz, 2H);  $^{13}\text{C NMR}$  (126 MHz,  $\text{CDCl}_3$ )  $\delta$  150.9, 137.0, 133.9, 132.1, 129.0, 121.6, 120.4, 112.6, 99.6, 47.0; **HRMS** (ESI)  $m/z$ :  $[\text{M}+\text{Na}]^+$  calculated for  $\text{C}_{14}\text{H}_{11}\text{N}_2\text{Br}^{79}\text{Na}$ : 309.0003; found: 308.9994.

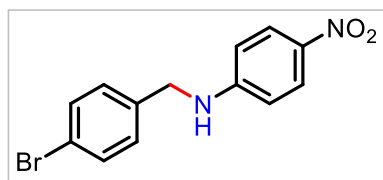

***N*-(4-Bromobenzyl)-4-nitroaniline (4ae)**<sup>9</sup>; General procedure (A) was followed using 4-bromobenzaldehyde (37mg, 0.2 mmol) to give a crude mixture which was purified by column chromatography ( $\text{SiO}_2$ , Hexane/ethyl acetate = 70/30) to afford the title compound as a green solid (35 mg, 57%); mp = 123-125 °C;  $^1\text{H NMR}$  (500 MHz,  $\text{DMSO-}d_6$ )  $\delta$  7.97 (d,  $J = 9.3$  Hz, 2H), 7.83 (t,  $J = 6.3$  Hz, 1H), 7.53 (d,  $J = 8.4$  Hz, 2H), 7.30 (d,  $J = 8.4$  Hz, 2H), 6.65 (d,  $J = 9.3$  Hz, 2H), 4.40 (d,  $J = 6.1$  Hz, 2H);  $^{13}\text{C NMR}$  (126 MHz,  $\text{DMSO-}d_6$ )  $\delta$  154.3, 138.2, 136.3, 131.5, 129.5, 126.2, 120.2, 111.3, 45.3; **HRMS** (ESI)  $m/z$ :  $[\text{M}+\text{H}]^+$  calculated for  $\text{C}_{13}\text{H}_{12}\text{N}_2\text{Br}^{79}\text{O}_2$ : 307.0082; found: 307.0071.

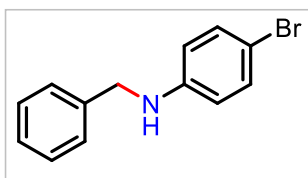

***N*-Benzyl-4-bromoaniline (4af)**<sup>9</sup>; General procedure (A) was followed using benzaldehyde (0.2 mmol) to give a crude mixture which was purified by column chromatography ( $\text{SiO}_2$ , Hexane/ethyl acetate = 95/5) to afford the title compound as a white viscous (47.5 mg, 91%);  $^1\text{H NMR}$  (500 MHz,  $\text{CDCl}_3$ )  $\delta$  7.34 (d,  $J = 4.4$  Hz, 4H), 7.29 – 7.27 (m, 1H), 7.26 – 7.21 (m, 2H), 6.50 (d,  $J = 8.9$  Hz, 2H), 4.30 (s, 2H), 4.08 (s, 1H);  $^{13}\text{C NMR}$  (126 MHz,  $\text{CDCl}_3$ )  $\delta$  147.2, 139.0, 132.1, 128.8, 127.54, 127.52, 114.6, 109.3, 48.4.

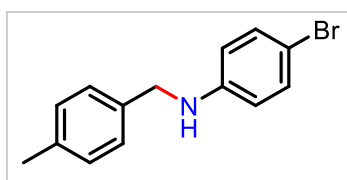

**4-Bromo-*N*-(4-methyl benzyl) aniline (4ag)**<sup>9</sup>; General procedure (A) was followed using 4-methylbenzaldehyde (0.2 mmol) to give a crude mixture which was purified by column chromatography ( $\text{SiO}_2$ , Hexane/ethyl acetate = 95/5) to afford the title compound as a white solid (52.5 mg, 95%); mp = 74-76 °C;  $^1\text{H NMR}$  (500 MHz,  $\text{CDCl}_3$ )  $\delta$  7.31 – 7.23 (m, 4H), 7.19 (d,  $J = 8.1$  Hz, 2H), 6.53 (d,  $J = 8.9$  Hz, 2H), 4.28 (s, 2H), 4.07 (s, 1H), 2.38 (s, 3H);  $^{13}\text{C NMR}$  (126 MHz,  $\text{CDCl}_3$ )  $\delta$  147.2, 137.2, 135.9, 132.0, 129.5, 127.5, 114.5, 109.1, 48.1, 21.2.

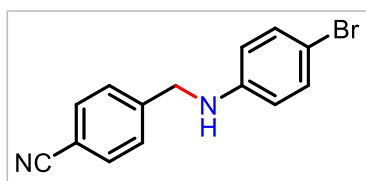

**4-((4-Bromophenyl) amino) methyl) benzonitrile (4ah)**<sup>9</sup>; General procedure (A) was followed using 4-formylbenzonitrile (0.2 mmol) to give a crude mixture which was purified by column chromatography ( $\text{SiO}_2$ , Hexane/ethyl acetate = 80/20) to afford the title compound as a pale yellow solid (48 mg, 83%); mp = 102-104 °C;  $^1\text{H NMR}$  (500 MHz,  $\text{CDCl}_3$ )  $\delta$  7.62 (d,  $J = 8.4$  Hz, 2H), 7.45 (d,  $J = 8.4$  Hz, 2H), 7.23 (d,  $J = 9.0$  Hz, 2H), 6.44 (d,  $J = 8.9$  Hz, 2H), 4.40 (s, 2H), 4.28

(s, 1H);  $^{13}\text{C NMR}$  (126 MHz,  $\text{CDCl}_3$ )  $\delta$  146.5, 144.9, 132.6, 132.2, 127.8, 118.9, 114.6, 111.3, 109.9, 47.8; **HRMS** (ESI)  $m/z$ :  $[\text{M}+\text{H}]^+$  calculated for  $\text{C}_{14}\text{H}_{12}\text{N}_2\text{Br}^{79}$ : 287.0184; found: 287.0174.

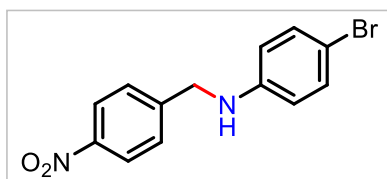

**4-Bromo-N-(4-nitrobenzyl) aniline (4ai)**<sup>9</sup>; General procedure (A) was followed using 4-nitrobenzaldehyde (0.2 mmol) to give a crude mixture which was purified by column chromatography ( $\text{SiO}_2$ , Hexane/ethyl acetate = 80/20) to afford the title compound as a pale yellow solid (40 mg, 65%); mp = 79–81 °C;  $^1\text{H NMR}$  (500 MHz,  $\text{CDCl}_3$ )  $\delta$  8.20 (d,  $J$  = 8.7 Hz, 2H), 7.51 (d,  $J$  = 8.7 Hz, 2H), 7.24 (d,  $J$  = 8.9 Hz, 2H), 6.45 (d,  $J$  = 8.9 Hz, 2H), 4.45 (s, 2H), 4.28 (s, 1H);  $^{13}\text{C NMR}$  (126 MHz,  $\text{CDCl}_3$ )  $\delta$  147.4, 146.9, 146.4, 132.3, 127.8, 124.1, 114.6, 110.1, 47.7.

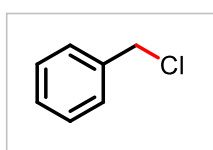

**(Chloromethyl)benzene (5aa)**<sup>10</sup>; General procedure (B) was followed using benzaldehyde (0.2 mmol) to give a crude mixture which was purified by column chromatography ( $\text{SiO}_2$ , Hexane) to afford the title compound as a colorless viscous (10 mg, 40%);  $^1\text{H NMR}$  (500 MHz,  $\text{CDCl}_3$ )  $\delta$  7.52 – 7.17 (m, 5H), 4.51 (s, 2H);  $^{13}\text{C NMR}$  (126 MHz,  $\text{CDCl}_3$ )  $\delta$  137.5, 128.7, 128.6, 128.4, 46.3.

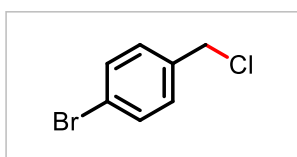

**1-Bromo-4-(chloromethyl) benzene (5ab)**<sup>10</sup>; General procedure (B) was followed using 4-bromobenzaldehyde (0.2 mmol) to give a crude mixture which was purified by column chromatography ( $\text{SiO}_2$ , Hexane) to afford the title compound as a colorless viscous (31.5 mg, 77%);  $^1\text{H NMR}$  (500 MHz,  $\text{CDCl}_3$ )  $\delta$  7.51 (d,  $J$  = 8.4 Hz, 2H), 7.29 (d,  $J$  = 8.4 Hz, 2H), 4.56 (s, 2H);  $^{13}\text{C NMR}$  (126 MHz,  $\text{CDCl}_3$ )  $\delta$  136.6, 132.0, 130.4, 122.6, 45.5.

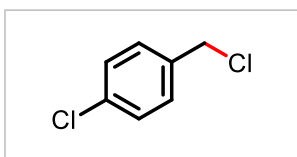

**1-Chloro-4-(chloromethyl) benzene (5ac)**<sup>10</sup>; General procedure (B) was followed using 4-chlorobenzaldehyde (0.2 mmol) to give a crude mixture which was purified by column chromatography ( $\text{SiO}_2$ , Hexane) to afford the title compound as a colorless viscous (22 mg, 68%);  $^1\text{H NMR}$  (500 MHz,  $\text{CDCl}_3$ )  $\delta$  7.37 – 7.29 (m, 4H), 4.55 (s, 2H);  $^{13}\text{C NMR}$  (126 MHz,  $\text{CDCl}_3$ )  $\delta$  136.1, 134.5, 130.1, 129.1, 45.5.

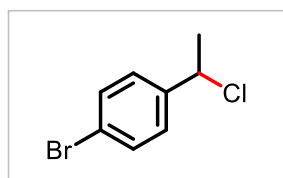

**1-Bromo-4-(1-chloroethyl) benzene (5ad)**<sup>10</sup>; General procedure (B) was followed using 4-bromoacetophenone (0.2 mmol) to give a crude mixture which was purified by column chromatography ( $\text{SiO}_2$ , Hexane) to afford the title compound as a colorless viscous (35 mg, 81%);  $^1\text{H NMR}$  (500 MHz,  $\text{CDCl}_3$ )  $\delta$  7.48 (d,  $J$  = 8.5 Hz, 2H), 7.29 (d,  $J$  = 8.5 Hz, 2H), 5.04 (q,  $J$  = 6.8 Hz, 1H), 1.82 (d,  $J$  = 6.7 Hz, 3H);  $^{13}\text{C NMR}$  (126 MHz,  $\text{CDCl}_3$ )  $\delta$  142.0, 131.9, 128.4, 122.2, 57.9, 26.6.

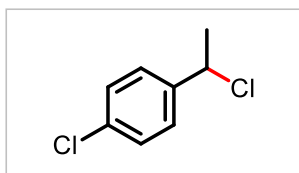

**1-Chloro-4-(1-chloroethyl) benzene (5ae)**<sup>10</sup>; General procedure (B) was followed using 4-chloroacetophenone (0.2 mmol) to give a crude mixture which was purified by column chromatography (SiO<sub>2</sub>, Hexane) to afford the title compound as a colorless viscous (24.5 mg, 70%); <sup>1</sup>H NMR (500 MHz, CDCl<sub>3</sub>) δ 7.42 (d, *J* = 1.7 Hz, 1H), 7.32 – 7.26 (m, 3H), 5.03 (q, *J* = 6.9 Hz, 1H), 1.83 (d, *J* = 6.7 Hz, 3H); <sup>13</sup>C NMR (126 MHz, CDCl<sub>3</sub>) δ 144.9, 134.6, 130.1, 128.5, 126.9, 124.9, 57.8, 26.6.

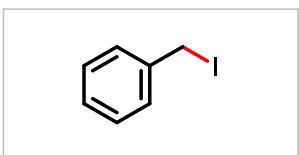

**(Iodomethyl)benzene (5af)**<sup>11</sup>; General procedure (B) was followed using benzaldehyde (0.2 mmol) to give a crude mixture which was purified by column chromatography (SiO<sub>2</sub>, Hexane) to afford the title compound as a colourless viscous (22 mg, 50%); <sup>1</sup>H NMR (500 MHz, CDCl<sub>3</sub>) δ 7.38 (d, *J* = 7.3 Hz, 2H), 7.30 (t, *J* = 7.3 Hz, 2H), 7.24 (t, *J* = 7.2 Hz, 1H), 4.47 (s, 2H); <sup>13</sup>C NMR (126 MHz, CDCl<sub>3</sub>) δ 139.4, 129.0, 128.9, 128.0, 5.8.

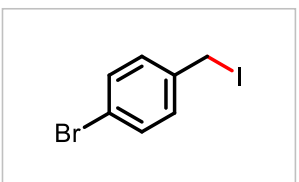

**1-Bromo-4-(iodomethyl) benzene (5ag)**<sup>11</sup>; General procedure (B) was followed using 4-bromobenzaldehyde (0.2 mmol) to give a crude mixture which was purified by column chromatography (SiO<sub>2</sub>, Hexane) to afford the title compound as a white solid (52 mg, 88%); mp = 62-64 °C; <sup>1</sup>H NMR (500 MHz, CDCl<sub>3</sub>) δ 7.41 (d, *J* = 8.4 Hz, 2H), 7.24 (d, *J* = 8.4 Hz, 2H), 4.39 (s, 2H); <sup>13</sup>C NMR (126 MHz, CDCl<sub>3</sub>) δ 138.5, 132.1, 130.5, 121.9, 4.3.

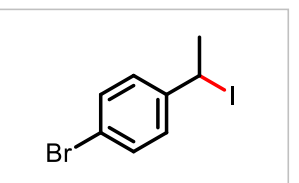

**1-Bromo-4-(1-iodoethyl) benzene (5ah)**<sup>11</sup>; General procedure (B) was followed using 4-bromoacetophenone (0.2 mmol) to give a crude mixture which was purified by column chromatography (SiO<sub>2</sub>, Hexane) to afford the title compound as a dark pick viscous (54 mg, 87%); <sup>1</sup>H NMR (500 MHz, CDCl<sub>3</sub>) δ 7.42 (d, *J* = 8.4 Hz, 2H), 7.31 (d, *J* = 8.5 Hz, 2H), 5.33 (q, *J* = 7.0 Hz, 1H), 2.18 (d, *J* = 7.2 Hz, 3H); <sup>13</sup>C NMR (126 MHz, CDCl<sub>3</sub>) δ 144.6, 132.0, 128.3, 121.7, 28.9, 24.4.

## 5. Control Experiment

### a. Synthesis of 3-Hydroxyindolin-2-one (7a)<sup>12</sup>

A reaction vial was charged with isatin (**1a**, 29.5 mg, 0.2 mmol) and Me<sub>2</sub>SiClH (**3a**, 44 μL, 0.4 mmol) in 0.5 mL of HFIP. After that, the reaction mixture was stirred vigorously to complete the reaction at 25 °C. The reaction mixture was evaporated in rotavapor, and purification was done by column chromatography (SiO<sub>2</sub>, Hexane/ethyl acetate = 60/40) to afford the 3-phenylindolin-2-one **7a** in 67% (20 mg); <sup>1</sup>H NMR (500 MHz, CD<sub>3</sub>OD) δ 7.36 (d, *J* = 7.5 Hz, 1H), 7.24 (t, *J* = 7.7 Hz, 1H), 7.03 (t, *J* = 8.1 Hz, 1H), 6.86 (d, *J* = 7.8 Hz, 1H), 4.92 (s, 1H); <sup>13</sup>C{<sup>1</sup>H} NMR (126 MHz, CD<sub>3</sub>OD) δ 180.6, 143.2, 130.5, 130.1, 126.0, 123.6, 111.1, 71.2.

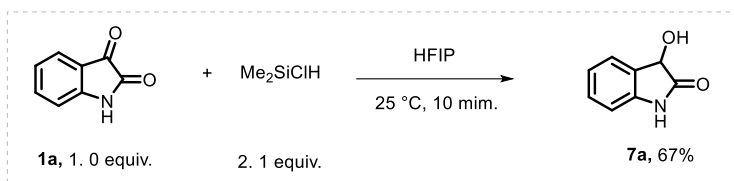

**Scheme S3a:** Synthesis of 3-Hydroxyindolin-2-one.

### b. Standard Reaction without Silane

The 0.5 mL HFIP was added to a mixture of isatin (**1a**, 29.5 mg, 0.2 mmol) and butane-1-thiol (0.42 mmol) at 25 °C. After that, the reaction mixture was stirred vigorously for 0.5 h at 25 °C. The desired product was not formed, as confirmed by the crude <sup>1</sup>H NMR analysis.

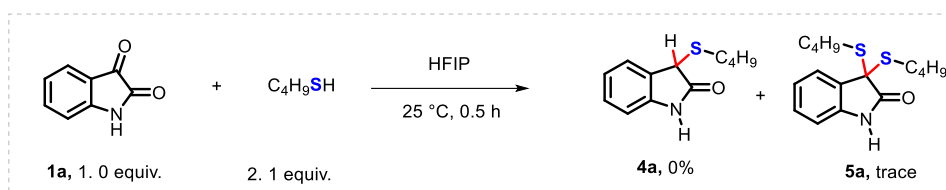

**Scheme S3b:** Standard Reaction without Silane.

### c. Synthesis of Spiro [indoline-3,2'-[1, 3] oxathiolan]-2-one (**7b**)

Isatin (**1a**, 29.5 mg, 0.2 mmol) was added at 25 °C in a solution of 2-mercaptoethanol-1-ol (0.22 mmol), Me<sub>2</sub>SiHCl (**3a**, 33 μL, 0.3 mmol) in 0.5 mL HFIP. The reaction mixture was then stirred at 25 °C for 5.0 min. After the completion, the crude reaction mixture was concentrated in vacuo and purified by column chromatography over silica in the eluent system EtOAc/Hexane and afforded **7b** in 80% yield.

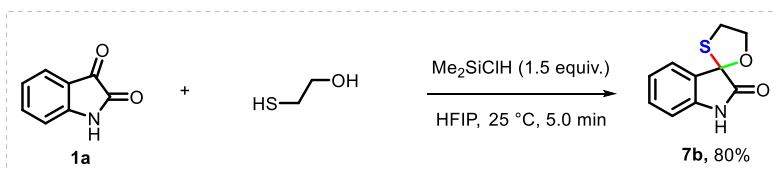

**Scheme S3c:** Synthesis of Spiro [indoline-3,2'-[1, 3] oxathiolan]-2-one.

<sup>1</sup>H NMR (500 MHz, CDCl<sub>3</sub>) δ 8.35 (s, 1H), 7.45 (d, *J* = 7.6 Hz, 1H), 7.34 – 7.24 (m, 1H), 7.10 (t, *J* = 7.6 Hz, 1H), 6.87 (d, *J* = 7.8 Hz, 1H), 4.79 (dt, *J* = 8.9, 6.3 Hz, 1H), 4.56 (dt, *J* = 8.7, 6.1 Hz, 1H), 3.72 – 3.62 (m, 1H), 3.47 (dt, *J* = 10.1, 6.1 Hz, 1H); <sup>13</sup>C{<sup>1</sup>H} NMR (126 MHz, CDCl<sub>3</sub>) δ 178.1, 140.7, 130.9, 126.9, 125.8, 123.5, 110.6, 88.9, 72.7, 34.2; HRMS (ESI) *m/z*: [M+Na]<sup>+</sup> calculated for C<sub>10</sub>H<sub>9</sub>SNO<sub>2</sub>Na: 230.0246; found: 230.0240.

### d. Reaction with Proton Sponge:



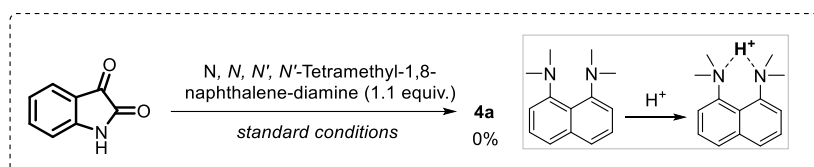

**Scheme S3d:** Reaction with Proton Sponge.

In control experiment **d**, we performed our standard reaction with substrate isatin (**1a**) (1.0 equiv., 0.2 mmol) and the butane-1-thiol (0.2 mmol) in the presence of *N, N, N', N'*-tetramethyl-1,8-naphthalene-diamine (1.1 equiv.) as a proton scavenger. The reaction mixture was stirred at 25 °C for 0.5 h. It was observed that there was no product formed, as confirmed by the crude <sup>1</sup>H NMR analysis.

## 6. Further Derivatization

**6.1 Synthesis of 3-Tosylindolin-2-one (**8a**)**<sup>13</sup>: A reaction vial (5 mL) was charged with *m*CPBA (70 mg, 57-86 % *m*CPBA, 0.4 mmol, 4.0 equiv.), 3-(*p*-tolylthio) indolin-2-one (**4f**, 25.5 mg, 0.1 mmol, 1.0 equiv.) in CH<sub>2</sub>Cl<sub>2</sub> (1.5 mL). After that, the reaction mixture was stirred vigorously for 2 hours at 25 °C. The reaction mixture was washed with aqueous saturated NaHCO<sub>3</sub>, dried over (MgSO<sub>4</sub>), and evaporated in vacuo. and purified by column chromatography (SiO<sub>2</sub>, Hexane/ethyl acetate = 50/50) to afford the 3-tosylindolin-2-one as a brick red solid (27 mg, 94%).

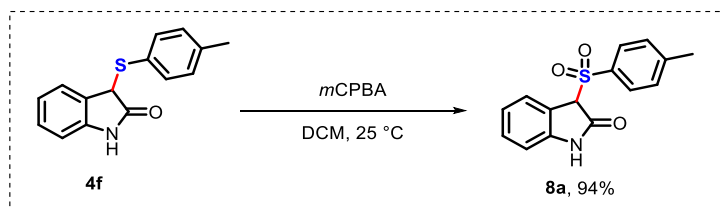

**Scheme S4a:** Synthesis of 3-Tosylindolin-2-one.

<sup>1</sup>H NMR (400 MHz, DMSO-*d*<sub>6</sub>) δ 10.67 (s, 1H), 7.57 (d, *J* = 8.2 Hz, 2H), 7.46 – 7.24 (m, 4H), 7.04 (t, *J* = 7.6 Hz, 1H), 6.78 (d, *J* = 7.7 Hz, 1H), 5.68 (s, 1H), 2.38 (s, 3H); <sup>13</sup>C{<sup>1</sup>H} NMR (126 MHz, DMSO-*d*<sub>6</sub>) δ 168.5, 145.7, 143.7, 134.2, 130.8, 130.0, 129.3, 127.1, 122.5, 119.7, 110.3, 68.2, 21.5; ν<sub>max</sub> (cm<sup>-1</sup>) 3422, 2925, 2855, 2254, 1721, 1645, 1468, 1319, 1150, 1026, 1001.

**6.2 Synthesis of 3-((4-Methoxyphenyl) thio)-1*H*-indole (**8b**)**<sup>13</sup>: Schwartz reagent, Cp<sub>2</sub>ZrHCl (103 mg, 0.4 mmol) was added at 25 °C in a solution of 3-((4-methoxyphenyl) thio) indolin-2-one (54 mg, 0.2 mmol), in 2 mL of dry THF and reaction mixture was stirred at 25 °C for 2 h. The standard workup procedure provided a crude product which was further purified by column chromatography (SiO<sub>2</sub>, Hexane/ethyl acetate = 80/25) to afford the 3-((4-methoxyphenyl) thio)-1*H*-indole as a pick solid (49.5 mg, 97%); mp = 109-111 °C; <sup>1</sup>H NMR (500 MHz, CDCl<sub>3</sub>) δ 8.41 (s, 1H), 7.77 (d, *J* = 7.9 Hz, 1H), 7.54 – 7.48 (m, 2H), 7.37 (t, *J* = 7.6 Hz, 1H), 7.31 – 7.25 (m, 3H), 6.86 (d, *J* = 8.9 Hz, 2H), 3.84 (s, 3H); <sup>13</sup>C{<sup>1</sup>H} NMR (126 MHz, CDCl<sub>3</sub>) δ 157.9, 136.6, 130.2, 129.6, 129.1, 128.7, 123.1, 120.9, 119.7, 114.6, 111.7, 104.7, 55.5; HRMS (ESI) *m/z*: [M+H]<sup>+</sup> calculated for C<sub>15</sub>H<sub>14</sub>SON: 256.0796; found: 245.0790.

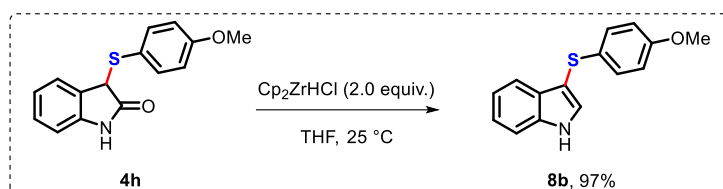

**Scheme S4b:** Synthesis of 3-((4-Methoxyphenyl) thio)-1*H*-indole.

**6.3 Synthesis of 1-Bromo-4-((*p*-tolylsulfinyl) methyl) benzene (8c):** *m*CPBA (35 mg, 0.2 mmol, 1.0 equiv.) was added to the solution of (4-bromobenzyl) (*p*-tolyl) sulfane (0.2 mmol, 1.0 equiv.) in DCM (2.0 mL) at 0 °C. The reaction mixture stirred vigorously for 1 hour. It was then washed with an aqueous solution of NaHCO<sub>3</sub> and dried over anhydrous Na<sub>2</sub>SO<sub>4</sub>.

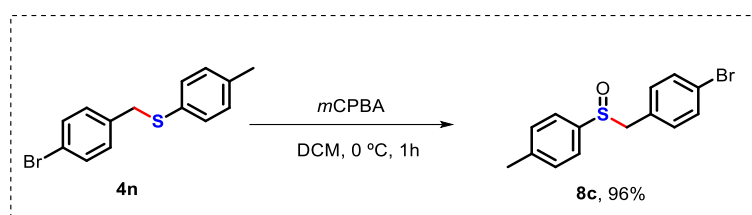

**Scheme S4c:** Synthesis of 1-Bromo-4-((*p*-tolylsulfinyl) methyl) benzene.

The reaction mixture was purified by column chromatography (SiO<sub>2</sub>, Hexane/ethyl acetate = 80/20) to afford the desired product as a white solid (59 mg, 96%); mp = 129-131 °C; <sup>1</sup>H NMR (500 MHz, CDCl<sub>3</sub>) δ 7.37 (d, *J* = 8.5 Hz, 2H), 7.28 – 7.22 (m, 4H), 6.84 (d, *J* = 8.4 Hz, 2H), 3.96 (s, 2H), 2.40 (s, 3H); <sup>13</sup>C{<sup>1</sup>H} NMR (126 MHz, CDCl<sub>3</sub>) δ 141.9, 139.3, 132.1, 131.6, 129.8, 128.3, 124.5, 122.6, 62.6, 21.6; HRMS (ESI) *m/z*: [M+Na]<sup>+</sup> calculated for C<sub>14</sub>H<sub>13</sub>SONaBr<sup>79</sup> 330.9768; found: 330.9756; ν<sub>max</sub> (cm<sup>-1</sup>) 3432, 2963, 2916, 1988, 1591, 1485, 1402, 1306, 1140, 1035, 895.

**6.4 Synthesis of [1,1'-Biphenyl]-4-yl(4-methylbenzyl) sulfane (8d):** In a Schlenk tube (4-bromobenzyl) (*p*-tolyl) sulfane (0.2 mmol, 1.0 equiv.), Phenylboronic acid (0.4 mmol, 2.0 equiv.), Pd(PPh<sub>3</sub>)<sub>4</sub> (10 mol%) and Cs<sub>2</sub>CO<sub>3</sub> (0.4 mmol, 2.0 equiv.) were taken, and a vacuum was created using high vacuum pressure followed by N<sub>2</sub> purging using an N<sub>2</sub> balloon. Solvent DMF (1 mL) was added, and the reaction mixture was stirred for 4 hours at 90 °C in an oil bath. Then the reaction mixture was quenched with saturated NH<sub>4</sub>Cl solution and extracted with ethyl acetate. The organic layer was collected, evaporated, and dried over Na<sub>2</sub>SO<sub>4</sub>.

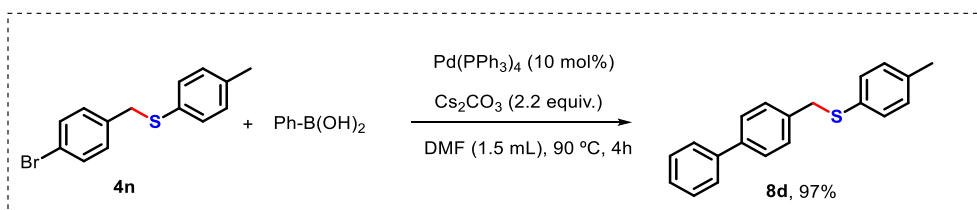

**Scheme S4d:** Synthesis of [1,1'-Biphenyl]-4-yl(4-methylbenzyl) sulfane.

The reaction mixture was purified by column chromatography using (SiO<sub>2</sub>; Hexane) to afford the desired product as a white solid (57 mg, 97%); mp = 126-128 °C; <sup>1</sup>H NMR (500 MHz, CDCl<sub>3</sub>) δ 7.61

(d,  $J = 8.2$  Hz, 2H), 7.54 (d,  $J = 8.2$  Hz, 2H), 7.46 (t,  $J = 7.7$  Hz, 2H), 7.39 – 7.35 (m, 3H), 7.28 (d,  $J = 8.2$  Hz, 2H), 7.11 (d,  $J = 8.2$  Hz, 2H), 4.13 (s, 2H), 2.35 (s, 3H);  $^{13}\text{C}\{^1\text{H}\}$  NMR (126 MHz,  $\text{CDCl}_3$ )  $\delta$  140.9, 140.1, 137.0, 136.7, 132.6, 130.8, 129.8, 129.4, 128.9, 127.4, 127.3, 127.1, 39.6, 21.2; **HRMS** (ESI)  $m/z$ :  $[\text{M}+\text{Na}]^+$  calculated for  $\text{C}_{20}\text{H}_{18}\text{SNa}$  313.1021; found: 313.1022.

**6.5 Synthesis of 1,3-Dibenzyl-3-(*p*-tolylthio) indolin-2-one (8e):** In a 5 mL round bottom flask,  $\text{K}_2\text{CO}_3$  (2.2 equiv.) and benzyl bromide (1.1 equiv.) were added to the solution of **4v** (0.2 mmol, 1.0 equiv.) in DMF (0.2 mL) at room temperature. After completion,  $\text{H}_2\text{O}$  (3 mL) was added, and the mixture was extracted with  $\text{Et}_2\text{O}$  (5 mL) three-time. The organic layer was collected, evaporated, and dried over  $\text{Na}_2\text{SO}_4$ , and purified by column chromatography ( $\text{SiO}_2$ , Hexane/ethyl acetate = 70/30) to afford the **8e** as a pale-yellow solid (83.5 mg, 96%); mp = 59-61 °C;  $^1\text{H}$  NMR (500 MHz,  $\text{CDCl}_3$ )  $\delta$  7.50 (d,  $J = 7.5$  Hz, 1H), 7.19 (d,  $J = 8.1$  Hz, 2H), 7.13 (t,  $J = 7.2$  Hz, 2H), 7.07 (t,  $J = 7.7$  Hz, 5H), 7.01 – 6.91 (m, 5H), 6.49 (d,  $J = 7.6$  Hz, 2H), 6.14 (d,  $J = 7.8$  Hz, 1H), 4.72 (d,  $J = 16.0$  Hz, 1H), 4.26 (d,  $J = 16.0$  Hz, 1H), 3.58 (d,  $J = 13.0$  Hz, 1H), 3.44 (d,  $J = 13.1$  Hz, 1H), 2.28 (s, 3H);  $^{13}\text{C}$  NMR (126 MHz,  $\text{CDCl}_3$ )  $\delta$  175.5, 142.5, 139.7, 136.8, 135.1, 130.5, 129.3, 129.1, 128.7, 128.5, 128.0, 127.1, 126.9, 126.5, 126.1, 124.9, 122.4, 109.1, 60.3, 43.4, 41.5, 21.4; **HRMS** (ESI)  $m/z$ :  $[\text{M}+\text{Na}]^+$  calculated: for  $\text{C}_{29}\text{H}_{25}\text{SONNa}$  458.1555; found: 458.1557;  $\nu_{\text{max}}$  ( $\text{cm}^{-1}$ ) 3408, 3056, 3028, 2916, 2849, 1906, 1713, 1607, 1492, 1466, 1209.

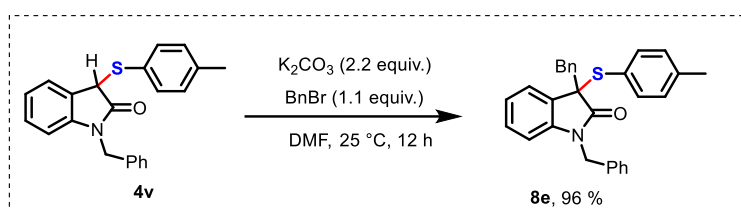

**Scheme S4e:** Synthesis of 1,3-Dibenzyl-3-(*p*-tolylthio) indolin-2-one.

## 7. (a) Late-Stage Diversification for Synthesis of (8*R*,9*S*,13*S*,14*S*)-13-Methyl-17-(*p*-tolylthio)-7,8,9,11,12,13,14,15,16,17-decahydro-6*H*-cyclopenta[*a*]phenanthren-3-ol (10a)

General procedure (A) was followed using estrone (**9a**) (54 mg, 0.2 mmol) to give a crude mixture which was purified by column chromatography ( $\text{SiO}_2$ , Hexane/ethyl acetate = 90/10) to afford the title white solid (55 mg, 72%); mp = 78-81 °C;  $^1\text{H}$  NMR (500 MHz,  $\text{CDCl}_3$ )  $\delta$  7.34 (d,  $J = 8.2$  Hz, 2H), 7.12 (d,  $J = 8.4$  Hz, 1H), 7.08 (d,  $J = 8.1$  Hz, 2H), 6.61 (d,  $J = 8.4$  Hz, 1H), 6.56 (s, 1H), 4.72 (s, 1H), 3.08 (t,  $J = 9.4$  Hz, 1H), 2.88 – 2.74 (m, 2H), 2.32 (s, 3H), 2.28 – 2.20 (m, 2H), 2.21 – 2.12 (m, 1H), 1.91 – 1.84 (m, 2H), 1.82 – 1.70 (m, 2H), 1.49 – 1.29 (m, 5H), 1.25 – 1.17 (m, 1H), 0.85 (s, 3H);  $^{13}\text{C}$  NMR (126 MHz,  $\text{CDCl}_3$ )  $\delta$  153.4, 138.3, 136.4, 133.5, 132.8, 131.6, 129.6, 126.6, 115.4, 112.8, 59.6, 53.6, 44.9, 44.0, 39.3, 37.7, 31.1, 29.7, 27.7, 26.5, 24.3, 21.2, 13.5; **HRMS** (ESI)  $m/z$ :  $[\text{M}-\text{H}]^-$  calculated for  $\text{C}_{25}\text{H}_{29}\text{OS}$ : 377.1939; found: 377.1948.

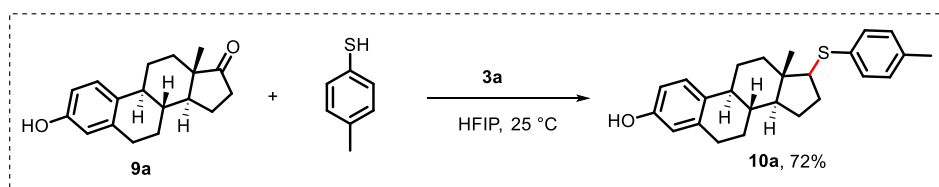

**Scheme S5a:** Synthesis of *(8R,9S,13S,14S)*-13-Methyl-17-(*p*-tolylthio)-7,8,9,11,12,13,14,15,16,17-decahydro-6*H*-cyclopenta[*a*]phenanthren-3-ol.

**(b) Late-Stage Diversification for Synthesis of *(1R,2S,5R)*-2-Isopropyl-5-methylcyclohexyl 4-(*p*-tolylthio methyl) benzoate (**10b**)**

General procedure (A) was followed using *(1R,2S,5R)*-2-isopropyl-5-methylcyclohexyl 4-formylbenzoate (**9b**) (58 mg, 0.2 mmol) to give a crude mixture which was purified by column chromatography (SiO<sub>2</sub>, Hexane/ethyl acetate = 95/5) and afforded white sticky (70 mg, 88%); <sup>1</sup>H NMR (500 MHz, CDCl<sub>3</sub>) δ 7.94 (d, *J* = 8.4 Hz, 2H), 7.30 (d, *J* = 8.3 Hz, 2H), 7.20 (d, *J* = 8.2 Hz, 2H), 7.06 (d, *J* = 7.9 Hz, 2H), 4.91 (td, *J* = 10.9, 4.4 Hz, 1H), 4.07 (s, 2H), 2.31 (s, 3H), 2.15 – 2.09 (m, 1H), 1.95 (pd, *J* = 6.9, 2.7 Hz, 1H), 1.76 – 1.68 (m, 2H), 1.58 – 1.49 (m, 4H), 1.17 – 1.03 (m, 2H), 0.92 (t, *J* = 6.5 Hz, 6H), 0.79 (d, *J* = 6.9 Hz, 3H); <sup>13</sup>C NMR (126 MHz, CDCl<sub>3</sub>) δ 166.0, 143.3, 137.1, 131.8, 131.3, 129.9, 129.7, 128.9, 75.0, 47.4, 41.1, 39.8, 34.5, 31.6, 26.6, 23.8, 22.2, 21.2, 20.9, 16.7; HRMS (ESI) *m/z*: [M-H]<sup>-</sup> calculated for C<sub>25</sub>H<sub>31</sub>O<sub>2</sub>S: 395.2045; found: 395.2052; ν<sub>max</sub> (cm<sup>-1</sup>) 3411, 2951, 2920, 2869, 1712, 1609, 1492, 1450, 1371, 1271.

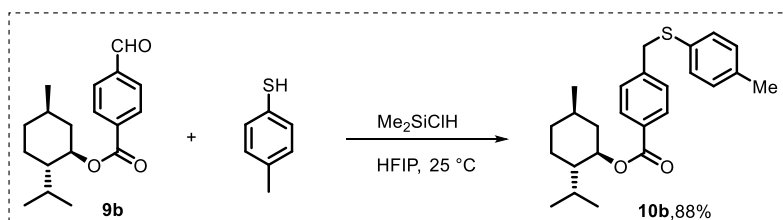

**Scheme S5b:** Synthesis of *(1R,2S,5R)*-2-Isopropyl-5-methylcyclohexyl 4-(*p*-tolylthio methyl) benzoate.

## 8. Computational Details

Structural optimization and total energy calculations were performed using density functional theory implemented in CP2K code.<sup>14a</sup> We have used module Quickstep where Kohn-Sham orbitals were modelled with atom-centered DZVP Gaussian basis set. The generalized gradient approximation (GGA) with the PBE form was employed to approximate the exchange-correlation interactions.<sup>14b</sup> We use DFT-D3 formalism for all the simulations to include the dispersion correction.<sup>14c</sup> The energy barriers associated with different steps of chemical reaction have been evaluated using the climbing image Nudged Elastic Band (NEB) calculations.<sup>14d</sup> We use eight images to map the reaction pathway for each step.

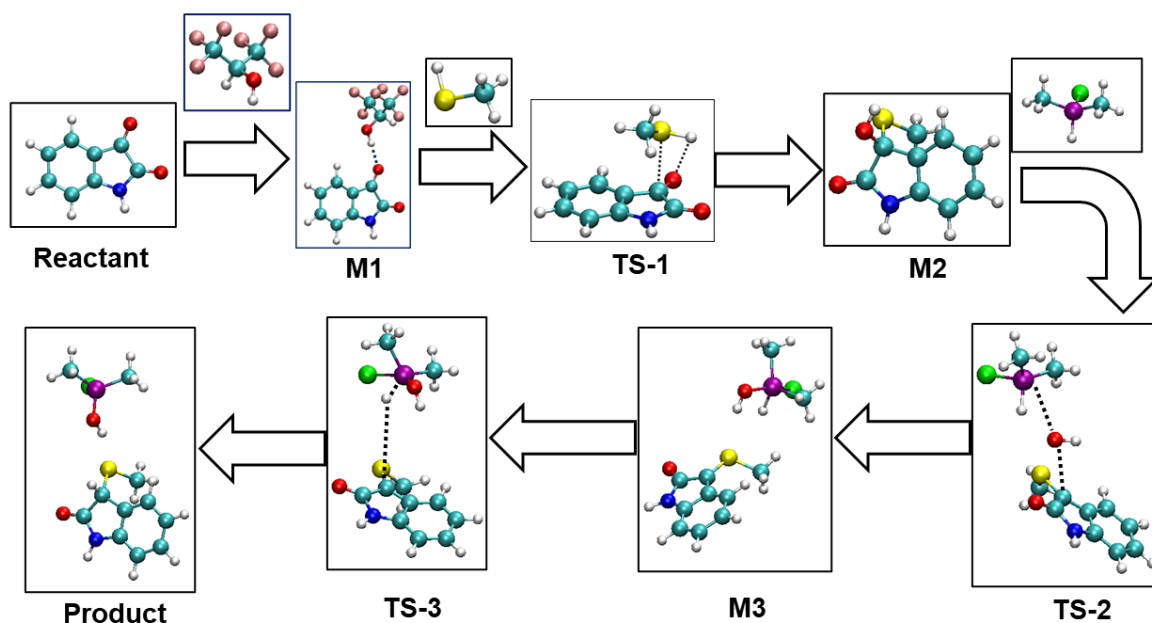

**Fig. S1.** Optimized molecular structures for the C-S coupling reaction using DFT-based simulations. The associated energy profile is presented in Figure S1, the main paper. The dotted lines indicate partial bond breaking and bond making at the transition state. Key: Hydrogen (white), carbon (cyan), oxygen (red), blue (nitrogen), sulfur (yellow), silicon (purple), chlorine (green), fluorine (pink).

8.1 The DFT-D3+PBE(GGA) optimized Cartesian coordinates (in Å) of reactants, intermediates, and product. Each structure is labeled by the name as used in Fig. S1. Total energy of each structure is given in Hartree unit.

Reactant (isatin)

|     |                |               |              |
|-----|----------------|---------------|--------------|
| E = | -90.4422413769 |               |              |
| C   | 8.0448183484   | 7.8195693409  | 7.4978765935 |
| C   | 6.6327458821   | 7.7787120332  | 7.4975076406 |
| C   | 5.8795604859   | 8.9464000171  | 7.4978735596 |
| C   | 6.5737060615   | 10.1662174604 | 7.4987767292 |
| C   | 7.9751334200   | 10.2208831442 | 7.4988385418 |
| C   | 8.7215349507   | 9.0387827955  | 7.4982130074 |
| H   | 4.7888823558   | 8.9223537304  | 7.4987885536 |
| H   | 6.0029459938   | 11.0964219702 | 7.5000216045 |
| H   | 8.4779108680   | 11.1881222621 | 7.5000875538 |
| H   | 9.8126117349   | 9.0509630514  | 7.4993798021 |
| C   | 7.2390613098   | 5.5438503625  | 7.5180422192 |
| O   | 7.1645355941   | 4.3299903616  | 7.5443377241 |
| N   | 6.1845638799   | 6.4490715611  | 7.5003130436 |
| H   | 5.2061073801   | 6.1638488497  | 7.5089036141 |
| C   | 8.5359940608   | 6.4367844231  | 7.5031775967 |

O 9.6730143257 5.9968252683 7.4978210604

## HFIP

E = -179.6918546906

|   |              |              |              |
|---|--------------|--------------|--------------|
| C | 5.6598623128 | 5.3286325168 | 6.0038297096 |
| H | 6.0985082692 | 4.3186018404 | 6.0014154232 |
| C | 6.1489710984 | 6.0196345214 | 7.2933538690 |
| C | 6.1555735223 | 6.0203107101 | 4.7165193431 |
| F | 5.6888845002 | 7.2852433412 | 7.3845479813 |
| F | 5.6967597137 | 5.3235337009 | 8.3745585683 |
| F | 7.5079738117 | 6.0578769563 | 7.3641669629 |
| F | 5.7093748958 | 5.3104916591 | 3.6449548183 |
| F | 7.5161849710 | 6.0593343546 | 4.6656535416 |
| F | 5.6925591655 | 7.2821733159 | 4.5877450602 |
| O | 4.2458958472 | 5.3260881089 | 5.9935493476 |
| H | 3.9294017319 | 4.4073196548 | 6.0108691233 |

## M1

E = -270.1510292511

|   |              |               |               |
|---|--------------|---------------|---------------|
| C | 7.1646390383 | 11.0006914925 | 9.9983165767  |
| C | 5.7482875523 | 10.9471046535 | 9.9997035512  |
| C | 4.9851984226 | 12.1086033285 | 10.0003095431 |
| C | 5.6689430777 | 13.3335668216 | 10.0001225874 |
| C | 7.0707304641 | 13.4028524233 | 9.9992025289  |
| C | 7.8303106393 | 12.2306157560 | 9.9980573427  |
| H | 3.8951398438 | 12.0756868748 | 10.0008342164 |
| H | 5.0889822489 | 14.2580826953 | 10.0007064937 |
| H | 7.5633141334 | 14.3750986276 | 9.9993312618  |
| H | 8.9209507014 | 12.2606960902 | 9.9969993954  |
| C | 6.3716241733 | 8.7204825552  | 9.9976810725  |
| O | 6.3091741643 | 7.5065246103  | 9.9982123118  |
| N | 5.3100148459 | 9.6164015966  | 9.9996186416  |
| H | 4.3343188369 | 9.3221256923  | 10.0033721893 |
| C | 7.6608868669 | 9.6283411237  | 9.9959665470  |
| O | 8.8012684432 | 9.1739538581  | 9.9930605960  |

|   |               |               |               |
|---|---------------|---------------|---------------|
| C | 12.4172403782 | 9.2002279689  | 10.0039259931 |
| H | 11.9830731850 | 8.1908631465  | 9.9045516386  |
| C | 13.2677179274 | 9.1711791186  | 11.2950272192 |
| C | 13.2677754370 | 9.4272295902  | 8.7327166479  |
| F | 13.9207137163 | 10.3349987203 | 11.5283899986 |
| F | 12.4553755336 | 8.9301263697  | 12.3597743356 |
| F | 14.2035409820 | 8.1807337953  | 11.2551670803 |
| F | 12.4544553178 | 9.4028967363  | 7.6408269113  |
| F | 14.2051787961 | 8.4527946018  | 8.5637421603  |
| F | 13.9196950331 | 10.6150321422 | 8.7452523151  |
| O | 11.4470212730 | 10.2109239076 | 10.1063824210 |
| H | 10.5453062444 | 9.8145547037  | 10.0527744621 |

TS-1

E = -108.67140691

|   |          |           |           |
|---|----------|-----------|-----------|
| C | 7.030378 | 11.016184 | 9.408520  |
| C | 5.755044 | 11.121069 | 10.040763 |
| C | 5.058649 | 12.329091 | 10.046357 |
| C | 5.648613 | 13.421656 | 9.398675  |
| C | 6.901135 | 13.327783 | 8.757032  |
| C | 7.602551 | 12.125350 | 8.760920  |
| H | 4.095704 | 12.422733 | 10.543759 |
| H | 5.123878 | 14.375998 | 9.397540  |
| H | 7.319275 | 14.203817 | 8.266231  |
| H | 8.573575 | 12.026900 | 8.278080  |
| C | 6.406604 | 8.933157  | 10.354944 |
| O | 6.259005 | 7.723220  | 10.509727 |
| N | 5.424355 | 9.910583  | 10.627155 |
| H | 4.518830 | 9.669216  | 11.016090 |
| C | 7.521806 | 9.699656  | 9.663465  |
| O | 8.663313 | 9.194136  | 9.296421  |
| S | 8.735987 | 9.184646  | 12.027291 |
| H | 8.974331 | 8.767135  | 10.312927 |
| C | 8.128463 | 7.710559  | 12.874352 |
| H | 8.860849 | 6.897798  | 12.776085 |
| H | 7.948301 | 7.915666  | 13.936060 |

H 7.201556 7.370993 12.375390

M2

E = -108.7177992064

|   |              |               |               |
|---|--------------|---------------|---------------|
| C | 7.1229634153 | 10.9962022498 | 10.0775909273 |
| C | 5.7175031021 | 10.9701977756 | 10.0872885002 |
| C | 4.9657218471 | 12.1411673749 | 10.0701138593 |
| C | 5.6587790807 | 13.3602873774 | 10.0378164405 |
| C | 7.0568738890 | 13.4013285692 | 10.0313037299 |
| C | 7.7974082955 | 12.2096393121 | 10.0573648366 |
| H | 3.8750507536 | 12.1171858861 | 10.0709061352 |
| H | 5.0927184865 | 14.2928149192 | 10.0166702086 |
| H | 7.5721245102 | 14.3620340120 | 10.0086025876 |
| H | 8.8899560079 | 12.2357914182 | 10.0649754551 |
| C | 6.3183042587 | 8.7264436286  | 10.0208983156 |
| O | 6.2109915008 | 7.5193078824  | 9.9301966549  |
| N | 5.2735684984 | 9.6405825984  | 10.1029388390 |
| H | 4.3004569622 | 9.3464766096  | 10.0389247335 |
| C | 7.6344207248 | 9.5769389614  | 10.0701523629 |
| O | 8.3884016631 | 9.2058710800  | 8.9291406550  |
| S | 8.6531860327 | 9.1290027981  | 11.5534811296 |
| C | 7.8808446184 | 10.0715795535 | 12.8971547111 |
| H | 8.4187168379 | 9.7720427789  | 13.8072871339 |
| H | 7.9837599251 | 11.1546534707 | 12.7577240916 |
| H | 6.8231828607 | 9.8046021649  | 13.0220307718 |
| H | 9.2207579065 | 9.7160085840  | 8.9558375266  |

SiMe<sub>2</sub>Cl(H)

E = -50.5838041950

|    |              |              |              |
|----|--------------|--------------|--------------|
| Si | 7.0316948844 | 7.2889201494 | 7.1375492421 |
| C  | 7.6684546254 | 8.2187519506 | 5.6553591134 |



|    |              |              |              |
|----|--------------|--------------|--------------|
| H  | 7.3045848494 | 9.2560665075 | 5.6549225513 |
| H  | 8.7680237917 | 8.2393498731 | 5.6445068436 |
| H  | 7.3298355564 | 7.7358907899 | 4.7242329660 |
| C  | 7.6746741416 | 5.5438075160 | 7.2014437690 |
| H  | 8.7739283737 | 5.5220224501 | 7.2109903189 |
| H  | 7.3116133211 | 5.0256668946 | 8.1003625508 |
| H  | 7.3324640636 | 4.9782037365 | 6.3192865264 |
| Cl | 7.6372758220 | 8.2816964360 | 8.8508275906 |
| O  | 5.3766430997 | 7.3269000573 | 7.2239882115 |
| H  | 4.8864743551 | 6.9167831081 | 6.4931637845 |

TS-2

E = -143.1717117

|   |           |           |           |
|---|-----------|-----------|-----------|
| C | 9.972895  | 13.770221 | 12.646377 |
| C | 8.573792  | 13.698836 | 12.385629 |
| C | 7.777235  | 14.840528 | 12.364073 |
| C | 8.395409  | 16.084623 | 12.571606 |
| C | 9.779103  | 16.180014 | 12.762747 |
| C | 10.573621 | 15.025195 | 12.793350 |
| H | 6.705190  | 14.770741 | 12.190435 |
| H | 7.789385  | 16.987787 | 12.570381 |
| H | 10.244737 | 17.155905 | 12.883052 |
| H | 11.651883 | 15.118579 | 12.910167 |
| C | 9.340505  | 11.501258 | 12.259484 |
| O | 9.304156  | 10.284259 | 12.085529 |
| N | 8.226231  | 12.365273 | 12.179616 |
| H | 7.309538  | 12.022961 | 11.908909 |
| C | 10.455394 | 12.401121 | 12.642807 |
| O | 13.225859 | 12.030442 | 11.975543 |
| S | 11.892975 | 11.722595 | 13.098975 |
| C | 12.354336 | 12.715917 | 14.556220 |
| H | 13.417129 | 12.580045 | 14.780567 |
| H | 12.097012 | 13.774077 | 14.444028 |
| H | 11.745948 | 12.287363 | 15.368349 |
| H | 13.088619 | 12.898576 | 11.550061 |

|    |           |           |           |
|----|-----------|-----------|-----------|
| Si | 16.421009 | 10.887311 | 12.068936 |
| H  | 15.121427 | 10.976601 | 12.718486 |
| C  | 17.173330 | 12.554253 | 11.668497 |
| H  | 17.128170 | 13.220629 | 12.539845 |
| H  | 18.230131 | 12.415539 | 11.404078 |
| H  | 16.684408 | 13.060338 | 10.823166 |
| C  | 16.452339 | 9.727293  | 10.604364 |
| H  | 17.490261 | 9.445786  | 10.385455 |
| H  | 15.886561 | 8.811798  | 10.821841 |
| H  | 16.029078 | 10.179114 | 9.695054  |
| Cl | 17.529234 | 10.039919 | 13.641018 |

M3

E = -143.16188850

|   |               |               |               |
|---|---------------|---------------|---------------|
| C | 10.0457009669 | 13.7062667690 | 12.6999703974 |
| C | 8.6140865576  | 13.6380388701 | 12.5634723673 |
| C | 7.8207663235  | 14.7808165808 | 12.5243132663 |
| C | 8.4624081843  | 16.0244571060 | 12.5655361640 |
| C | 9.8679827896  | 16.1215406038 | 12.6117692982 |
| C | 10.6598324343 | 14.9810711788 | 12.6824915031 |
| H | 6.7332399767  | 14.7127904815 | 12.4657419115 |
| H | 7.8601823278  | 16.9355822570 | 12.5489285131 |
| H | 10.3378034330 | 17.1044183223 | 12.5880645615 |
| H | 11.7469017962 | 15.0783855944 | 12.6782313546 |
| C | 9.3441760384  | 11.4525459652 | 12.5495642934 |
| O | 9.3116077299  | 10.2336059432 | 12.4578572628 |
| N | 8.2299654480  | 12.3085274804 | 12.4944532803 |
| H | 7.2932271532  | 11.9688329444 | 12.2927319396 |
| C | 10.5185625835 | 12.3638672023 | 12.7812133124 |
| O | 14.6876064666 | 11.6320677083 | 10.5878960715 |
| S | 11.9970455576 | 11.6151739352 | 13.1916744693 |
| C | 12.8161989912 | 12.8074577446 | 14.2840415757 |
| H | 13.8780578322 | 12.5354737703 | 14.2757269333 |
| H | 12.6971609180 | 13.8396526752 | 13.9513109084 |
| H | 12.3996001043 | 12.6856522615 | 15.2917762254 |
| H | 13.8334235319 | 11.7788066064 | 11.0263484901 |

|    |               |               |               |
|----|---------------|---------------|---------------|
| Si | 15.9367495900 | 11.2564883349 | 11.6975180775 |
| H  | 14.8095096140 | 10.8868123119 | 12.7444342691 |
| C  | 16.7720987493 | 12.8397671354 | 12.2781023038 |
| H  | 16.4251004920 | 13.1761367714 | 13.2636021914 |
| H  | 17.8532312387 | 12.6653513004 | 12.3653832234 |
| H  | 16.6133202688 | 13.6489742668 | 11.5510424075 |
| C  | 17.0221904256 | 10.2931070918 | 10.5144143154 |
| H  | 18.0565634086 | 10.2370850827 | 10.8753019192 |
| H  | 16.6483678115 | 9.2692200499  | 10.3811871262 |
| H  | 16.9960050189 | 10.7956022714 | 9.5350679893  |
| Cl | 16.6745353447 | 9.8874820699  | 13.5701373462 |

TS-3

E = -143.14774841

|   |           |           |           |
|---|-----------|-----------|-----------|
| C | 10.075771 | 13.731643 | 12.964589 |
| C | 8.830749  | 13.540984 | 12.258614 |
| C | 8.085575  | 14.623604 | 11.796099 |
| C | 8.614800  | 15.909464 | 11.978131 |
| C | 9.878777  | 16.116129 | 12.574732 |
| C | 10.607525 | 15.041816 | 13.075569 |
| H | 7.122111  | 14.474813 | 11.312180 |
| H | 8.047693  | 16.769300 | 11.623605 |
| H | 10.282208 | 17.127235 | 12.633183 |
| H | 11.592292 | 15.202785 | 13.513029 |
| C | 9.622299  | 11.434776 | 12.750484 |
| O | 9.679317  | 10.211468 | 12.773897 |
| N | 8.583401  | 12.185361 | 12.153159 |
| H | 7.829979  | 11.738680 | 11.635449 |
| C | 10.551642 | 12.449059 | 13.340797 |
| O | 14.768188 | 12.113275 | 9.854073  |
| S | 11.775099 | 11.965881 | 14.438228 |
| C | 11.689800 | 13.312491 | 15.672690 |
| H | 12.129368 | 12.890348 | 16.584135 |
| H | 12.244467 | 14.209298 | 15.379951 |
| H | 10.633620 | 13.552516 | 15.850075 |
| H | 13.997575 | 12.667780 | 10.056841 |

|    |           |           |           |
|----|-----------|-----------|-----------|
| Si | 15.627151 | 11.510151 | 11.192983 |
| H  | 14.508102 | 11.066036 | 12.121542 |
| C  | 16.617044 | 12.877738 | 12.035499 |
| H  | 16.173292 | 13.163451 | 12.999764 |
| H  | 17.630396 | 12.496544 | 12.233380 |
| H  | 16.690187 | 13.760680 | 11.385052 |
| C  | 16.719398 | 10.214804 | 10.406443 |
| H  | 17.604630 | 10.041759 | 11.033439 |
| H  | 16.191402 | 9.257705  | 10.289362 |
| H  | 17.028942 | 10.575122 | 9.414047  |
| Cl | 15.853359 | 9.910312  | 13.539736 |

Product

E = -143.28776548

|   |               |               |               |
|---|---------------|---------------|---------------|
| C | 10.3060484133 | 13.6636976025 | 12.3246885964 |
| C | 8.9015671719  | 13.5845634611 | 12.4251933035 |
| C | 8.1020043504  | 14.7220015482 | 12.5131811480 |
| C | 8.7460265625  | 15.9688831068 | 12.5197544847 |
| C | 10.1403388885 | 16.0657603552 | 12.4398358584 |
| C | 10.9290387256 | 14.9072375287 | 12.3377048928 |
| H | 7.0175692331  | 14.6474001776 | 12.5758311633 |
| H | 8.1457388946  | 16.8740371695 | 12.5913401343 |
| H | 10.6150469481 | 17.0445656584 | 12.4575227222 |
| H | 12.0146900485 | 14.9758461950 | 12.2809592603 |
| C | 9.5961057431  | 11.3627724318 | 12.3580435489 |
| O | 9.5320482706  | 10.1484938406 | 12.3718787950 |
| N | 8.5132145940  | 12.2376497306 | 12.4254989512 |
| H | 7.5588812309  | 11.8977139748 | 12.5012593739 |
| C | 10.8573885803 | 12.2650032211 | 12.2429971157 |
| O | 14.6447225602 | 11.5499933174 | 11.2101525486 |
| S | 12.1933736448 | 11.7974227945 | 13.4147217666 |
| C | 11.8432230265 | 12.8322034597 | 14.8674356720 |
| H | 12.5696481724 | 12.5100565658 | 15.6254199080 |
| H | 11.9810071454 | 13.8985978577 | 14.6565365423 |
| H | 10.8306953254 | 12.6519845168 | 15.2486753332 |
| H | 14.0415531156 | 11.8181871311 | 11.9380184624 |

|    |               |               |               |
|----|---------------|---------------|---------------|
| Si | 16.2095010486 | 11.2184716231 | 11.6053795070 |
| H  | 11.3083940724 | 12.0600115308 | 11.2585931926 |
| C  | 17.1411163240 | 12.7673250379 | 12.0500088696 |
| H  | 16.7027338614 | 13.2512861000 | 12.9329635005 |
| H  | 18.1933196845 | 12.5464566963 | 12.2733714170 |
| H  | 17.1048430501 | 13.4826744755 | 11.2162794594 |
| C  | 16.9755388700 | 10.2864318271 | 10.1931024823 |
| H  | 18.0267704498 | 10.0557396180 | 10.4141762372 |
| H  | 16.4502717777 | 9.3398539059  | 10.0109387057 |
| H  | 16.9426968188 | 10.8819371909 | 9.2697925377  |
| Cl | 16.2488632248 | 9.9921241905  | 13.2989561360 |

## 9. Copies of $^1\text{H}$ and $^{13}\text{C}$ $\{^1\text{H}\}$ NMR Spectra of Starting Materials and Products

### 3-(Butylthio) indolin-2-one (4a)

$^1\text{H}$  NMR (500 MHz,  $\text{CDCl}_3$ )

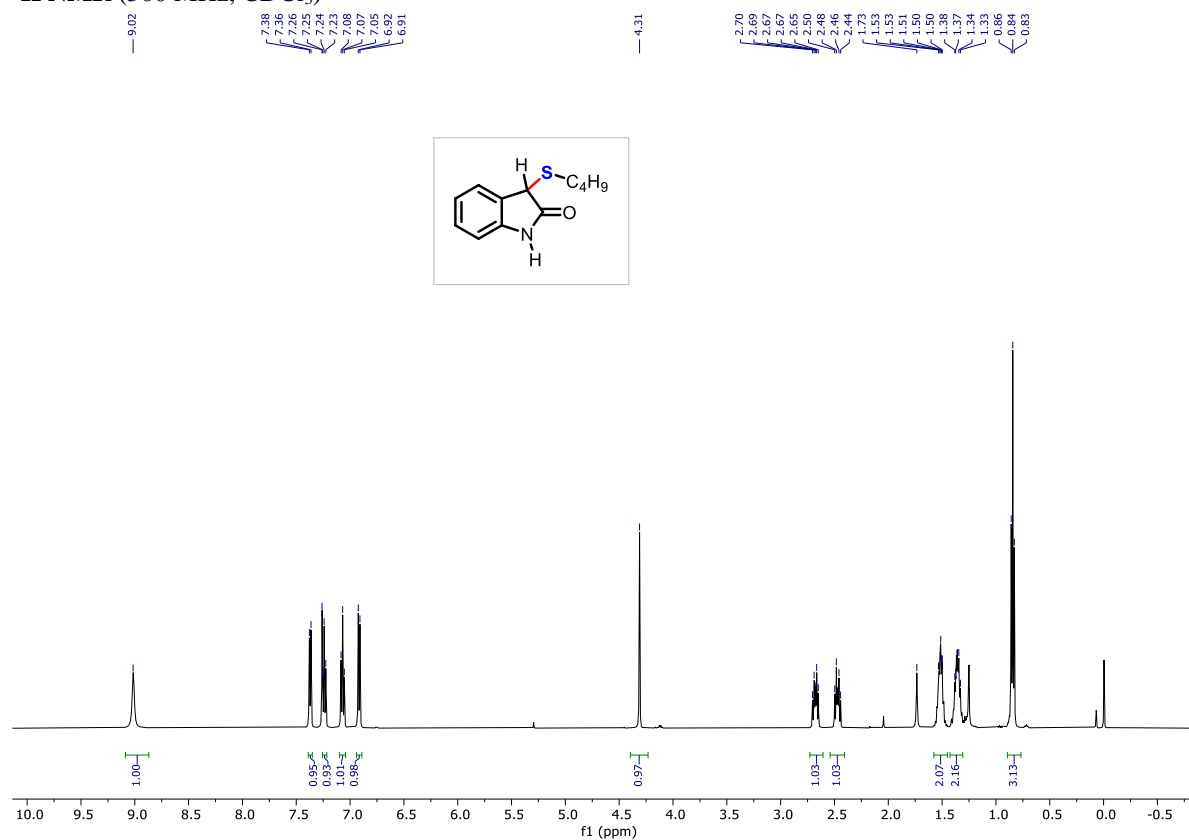

$^{13}\text{C}\{^1\text{H}\}$  NMR (126 MHz  $\text{CDCl}_3$ )

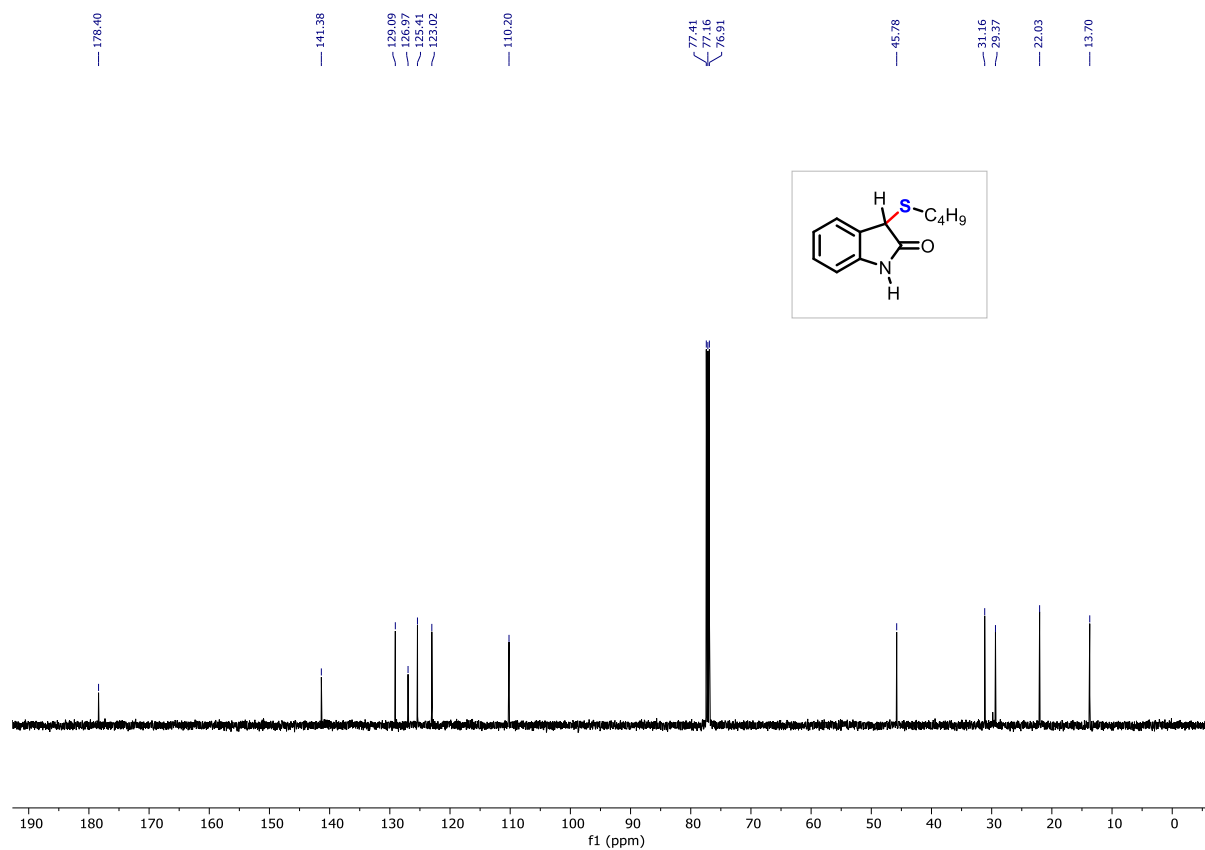

### 3-(Dodecylthio) Indolin-2-one (4b)

$^1\text{H}$  NMR (400 MHz,  $\text{CDCl}_3$ )

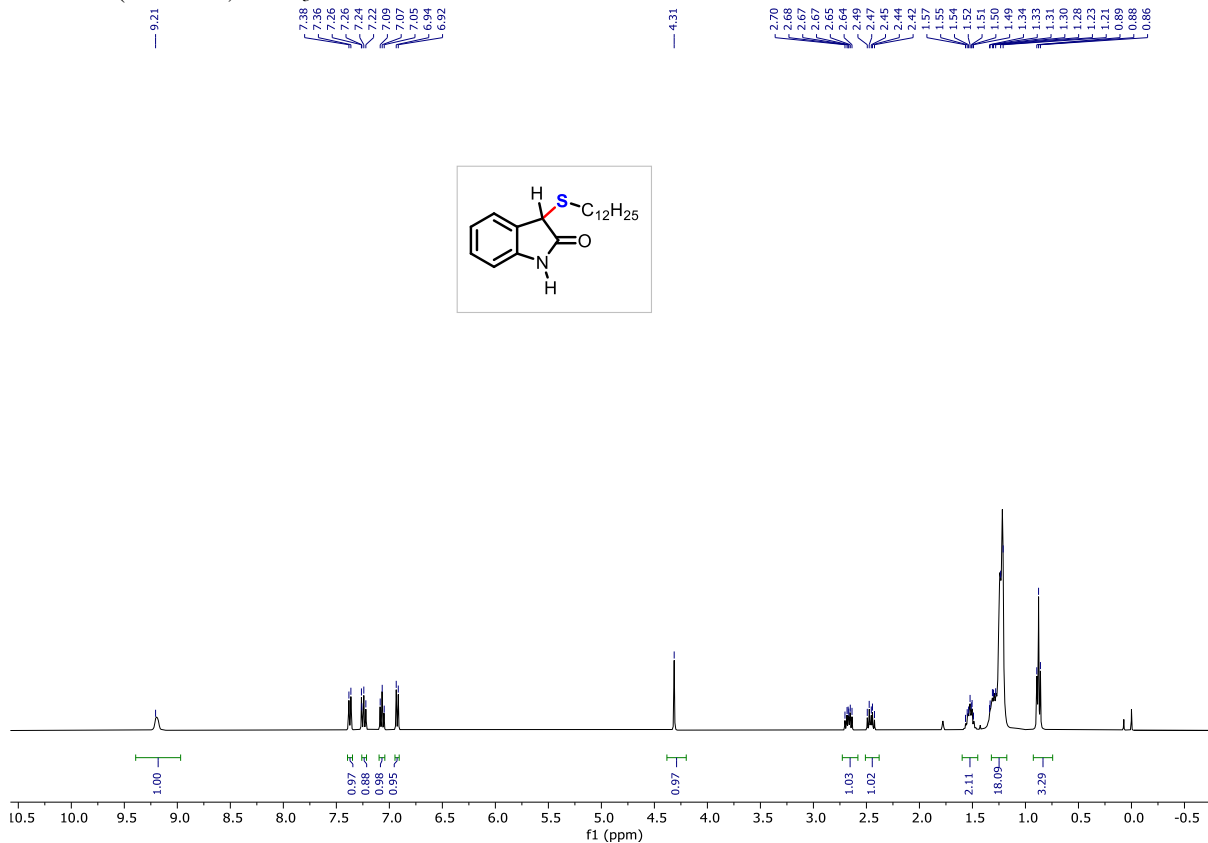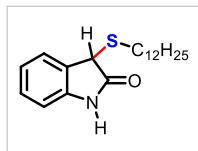

$^{13}\text{C}\{^1\text{H}\}$  NMR (126 MHz  $\text{CDCl}_3$ )

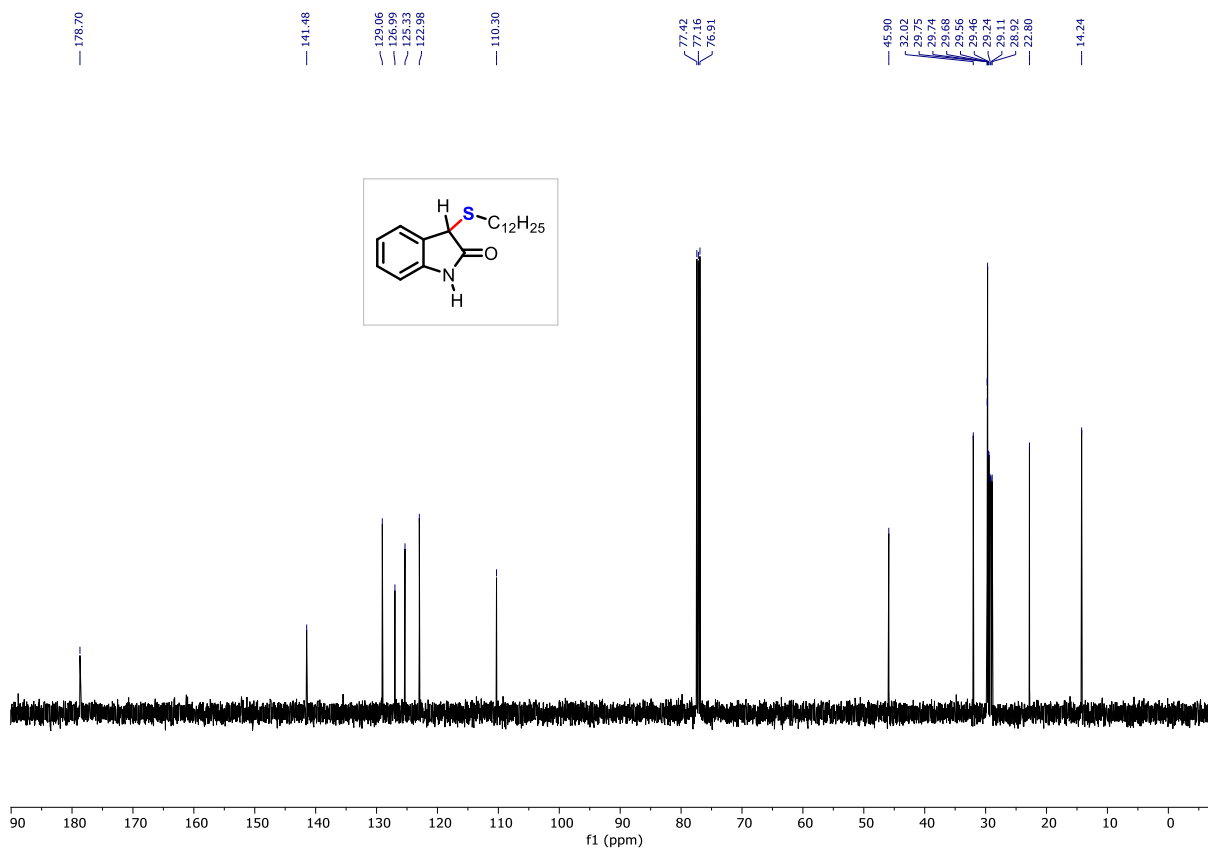

### 3-(Benzylthio) indolin-2-one (4c)

$^1\text{H}$  NMR (500 MHz,  $\text{CDCl}_3$ )

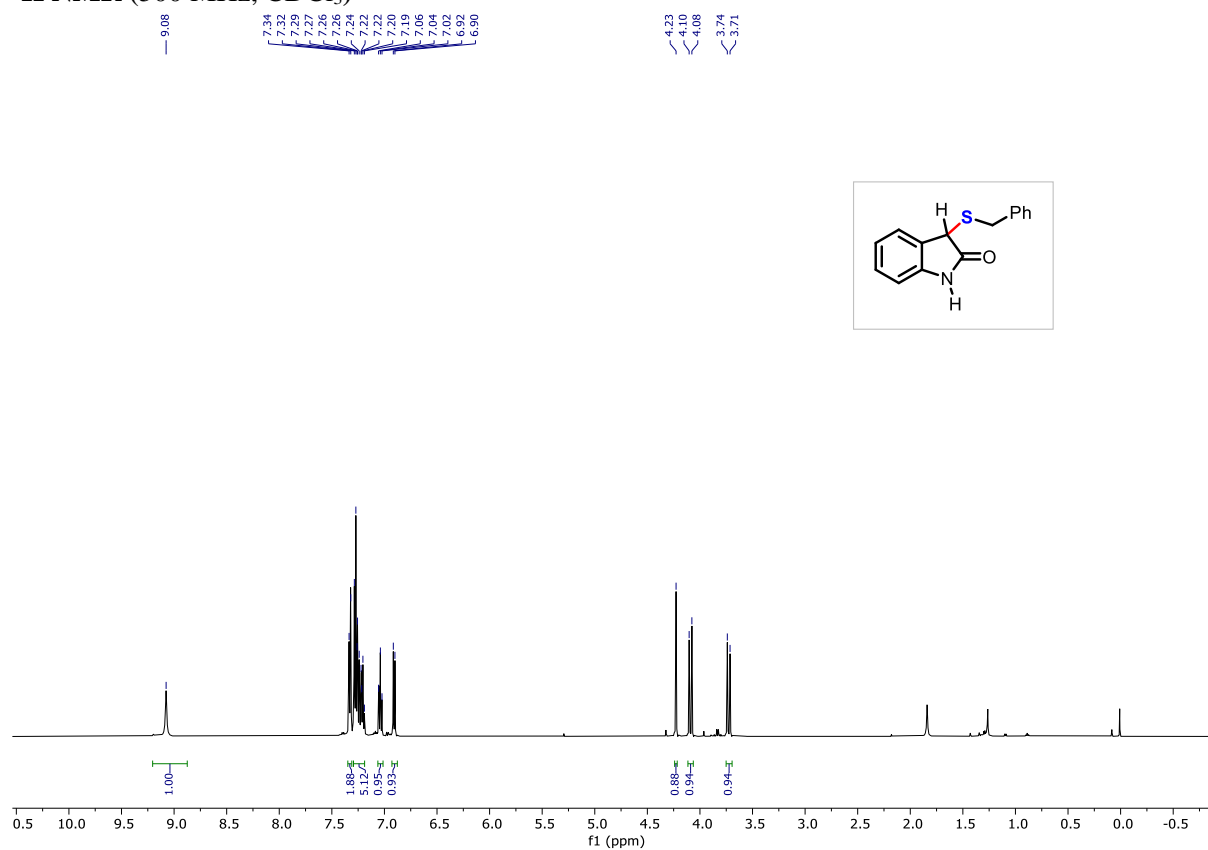

$^{13}\text{C}\{^1\text{H}\}$  NMR (126 MHz  $\text{CDCl}_3$ )

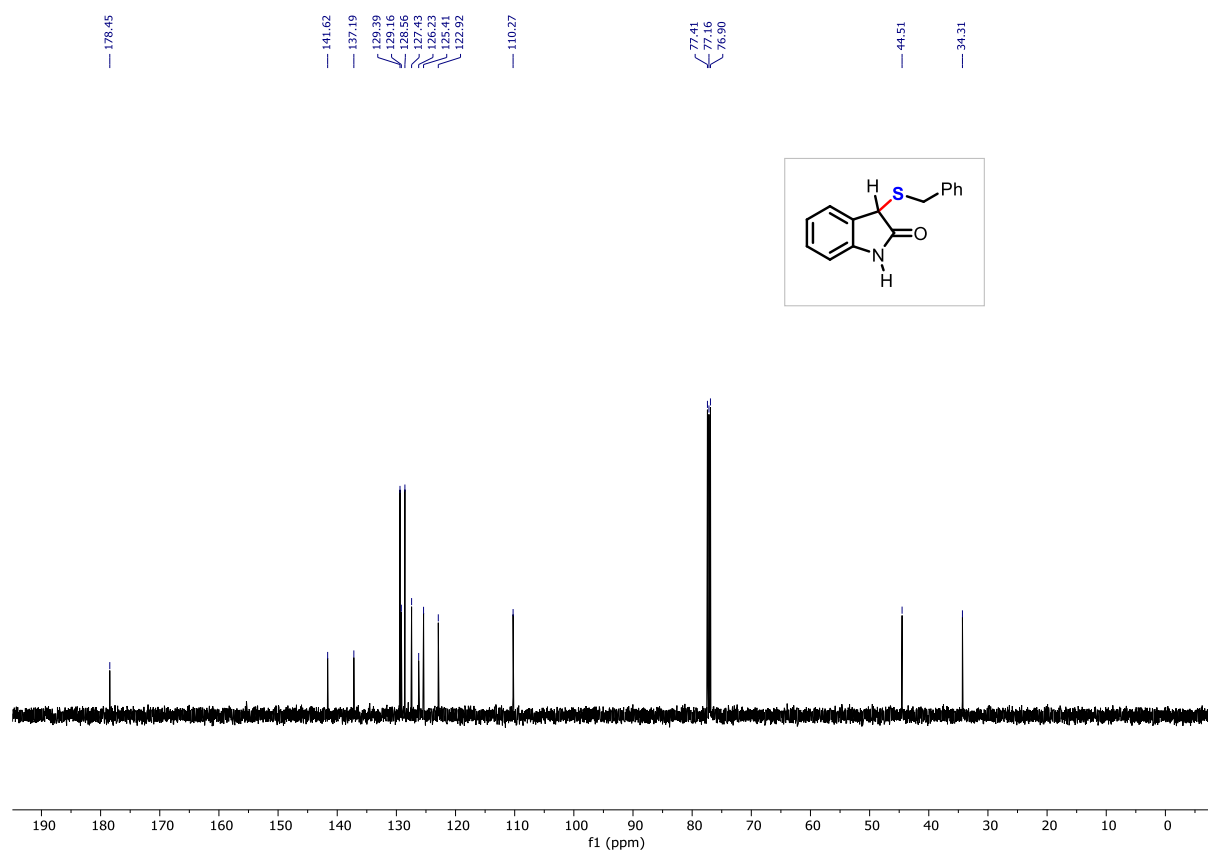



### 3-(Cyclohexylthio) indolin-2-one (4d)

$^1\text{H}$  NMR (500 MHz,  $\text{CDCl}_3$ )

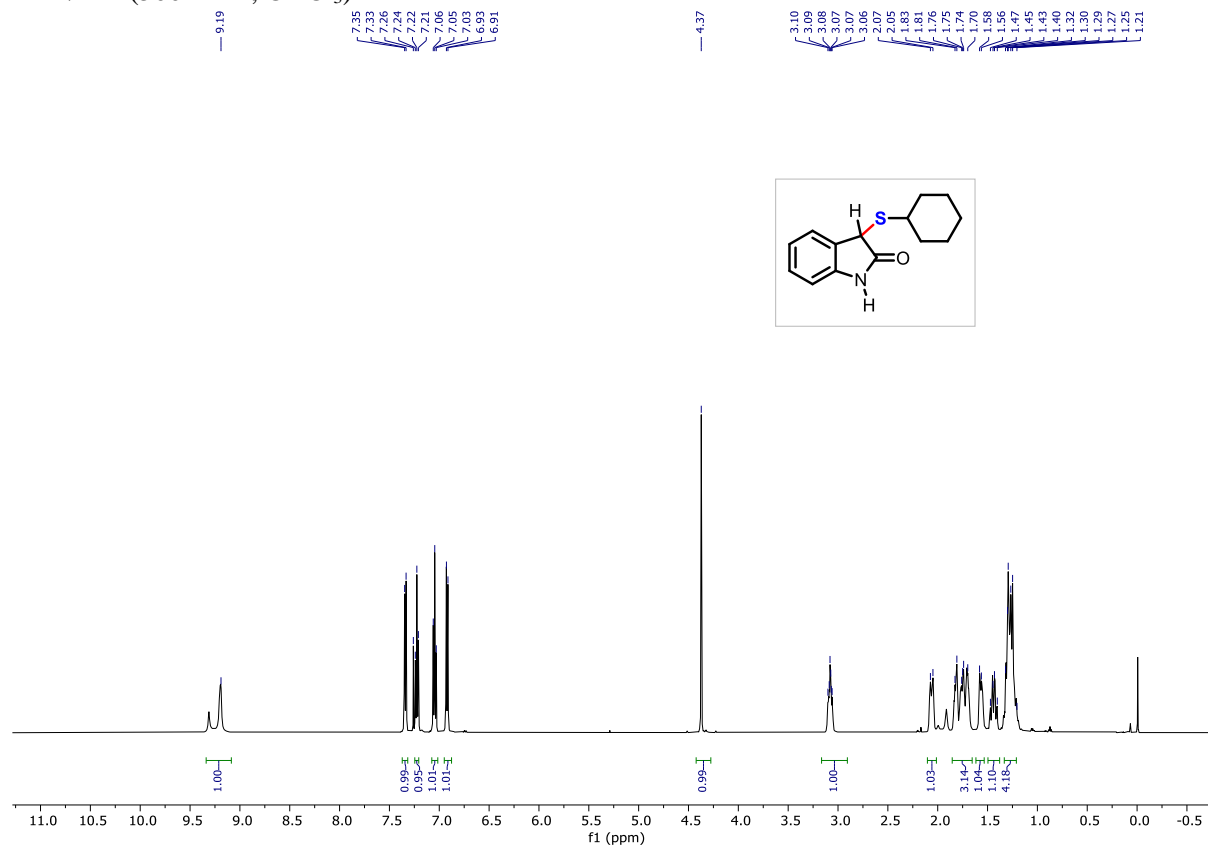

$^{13}\text{C}\{^1\text{H}\}$  NMR (126 MHz  $\text{CDCl}_3$ )

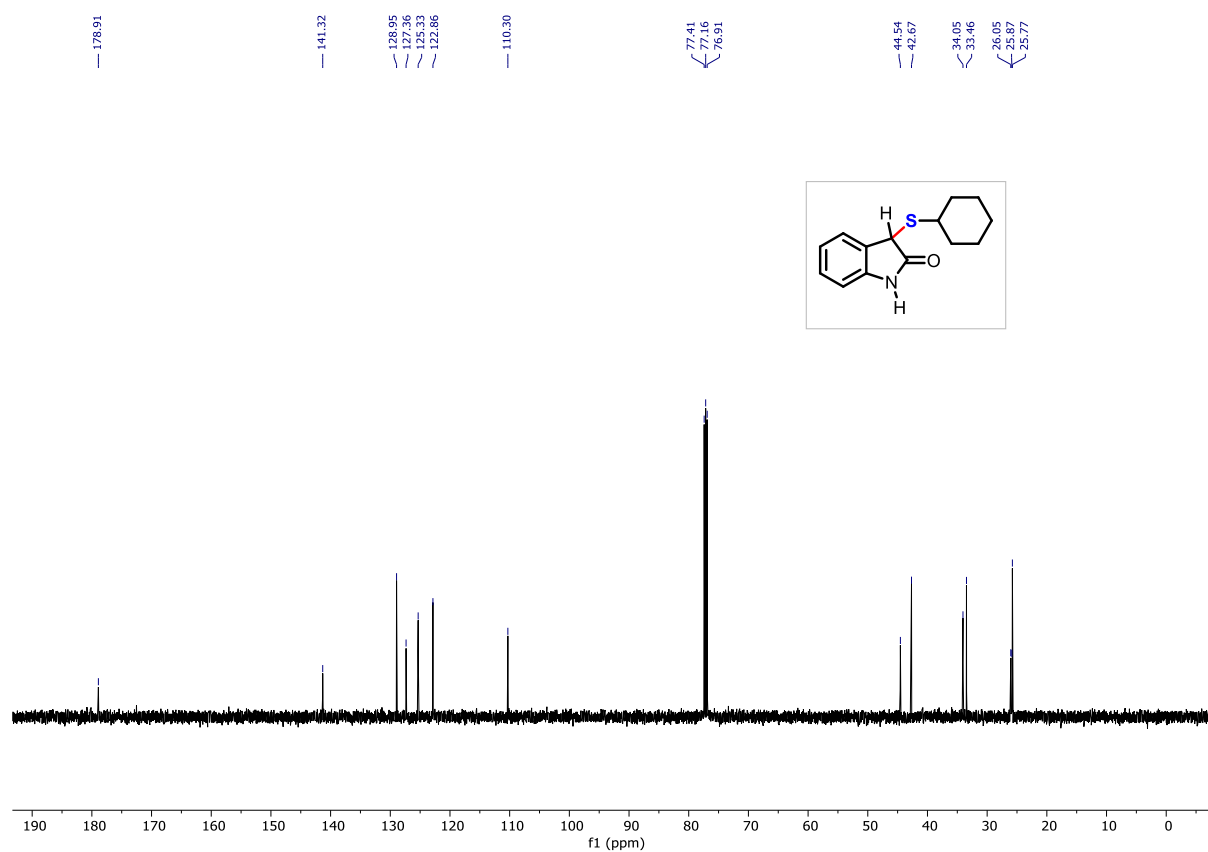

### 3-(Phenylsulfanyl) indolin-2-one (4e)

$^1\text{H}$  NMR (500 MHz,  $\text{CDCl}_3$ )

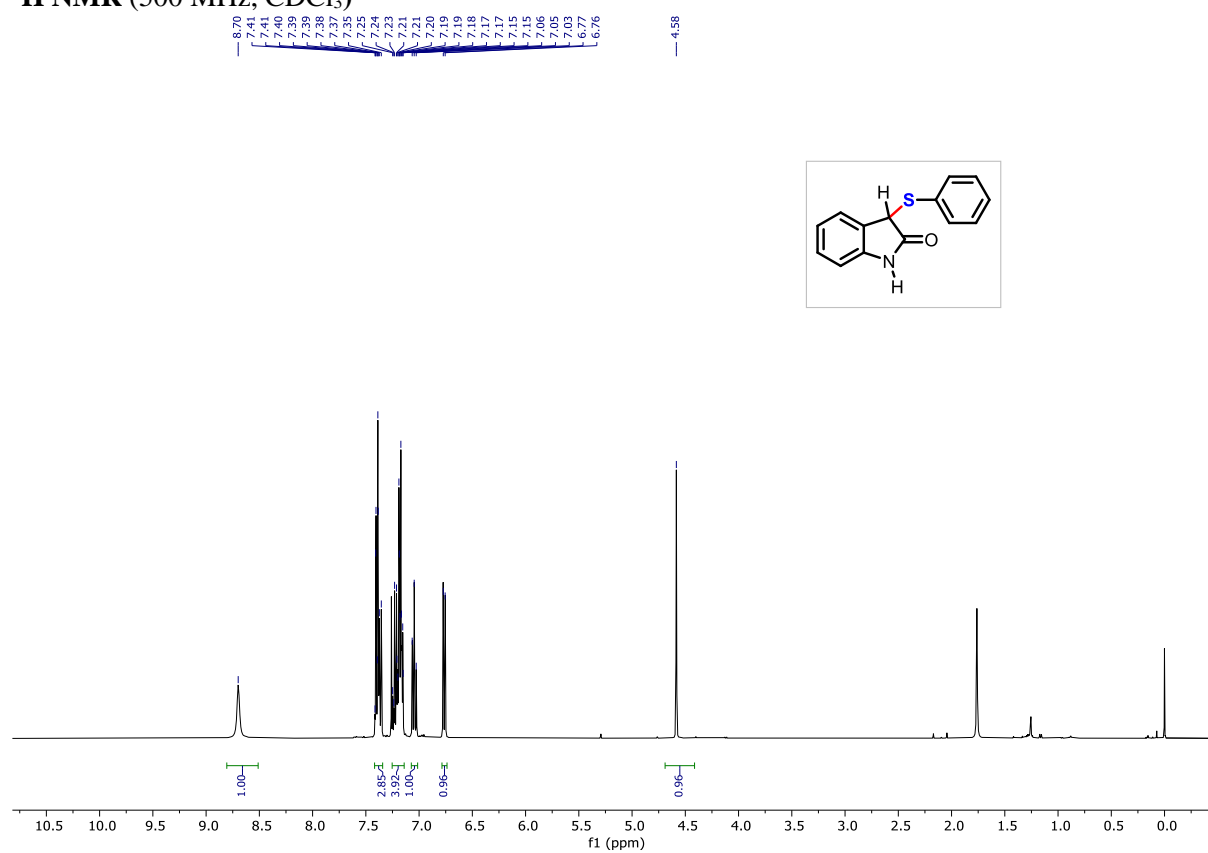

$^{13}\text{C}\{^1\text{H}\}$  NMR (126 MHz  $\text{CDCl}_3$ )

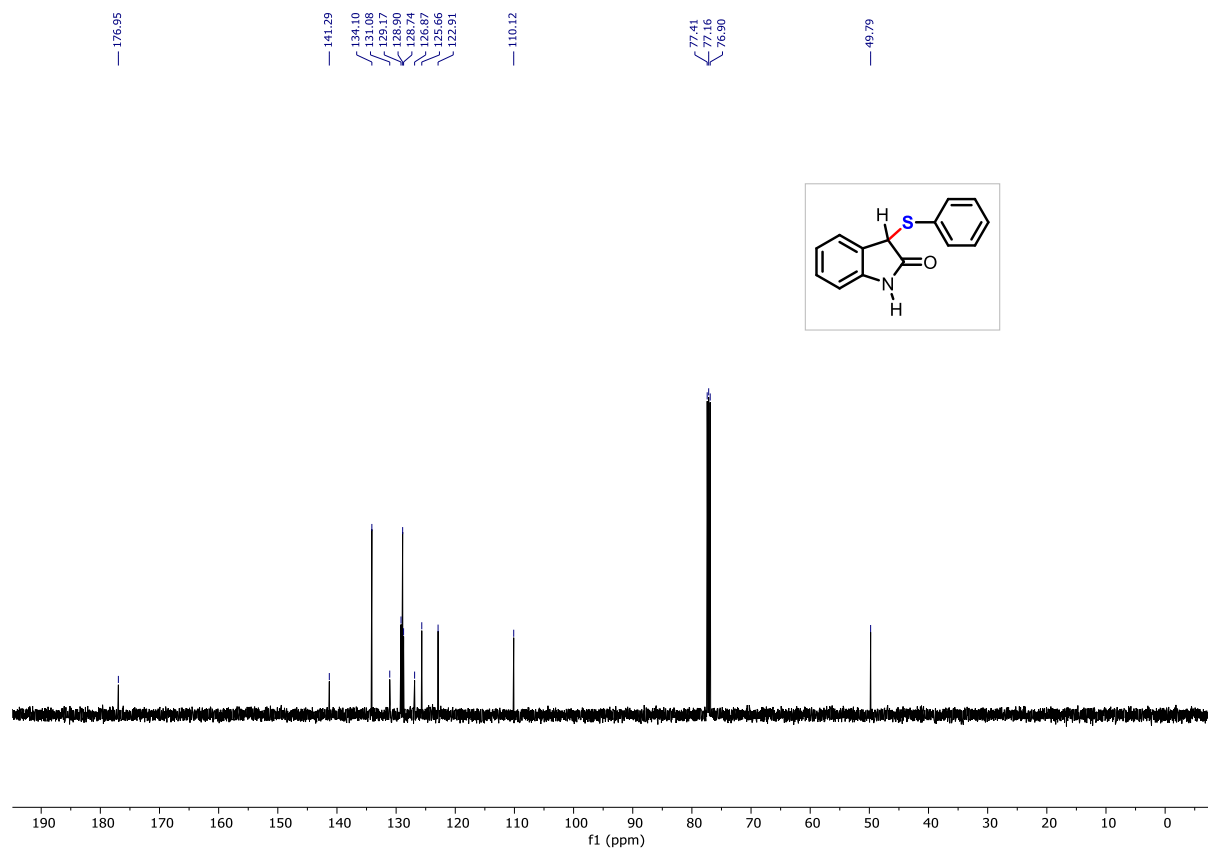

### 3-(*p*-Tolylthio) indolin-2-one (4f)

$^1\text{H}$  NMR (500 MHz,  $\text{CDCl}_3$ )

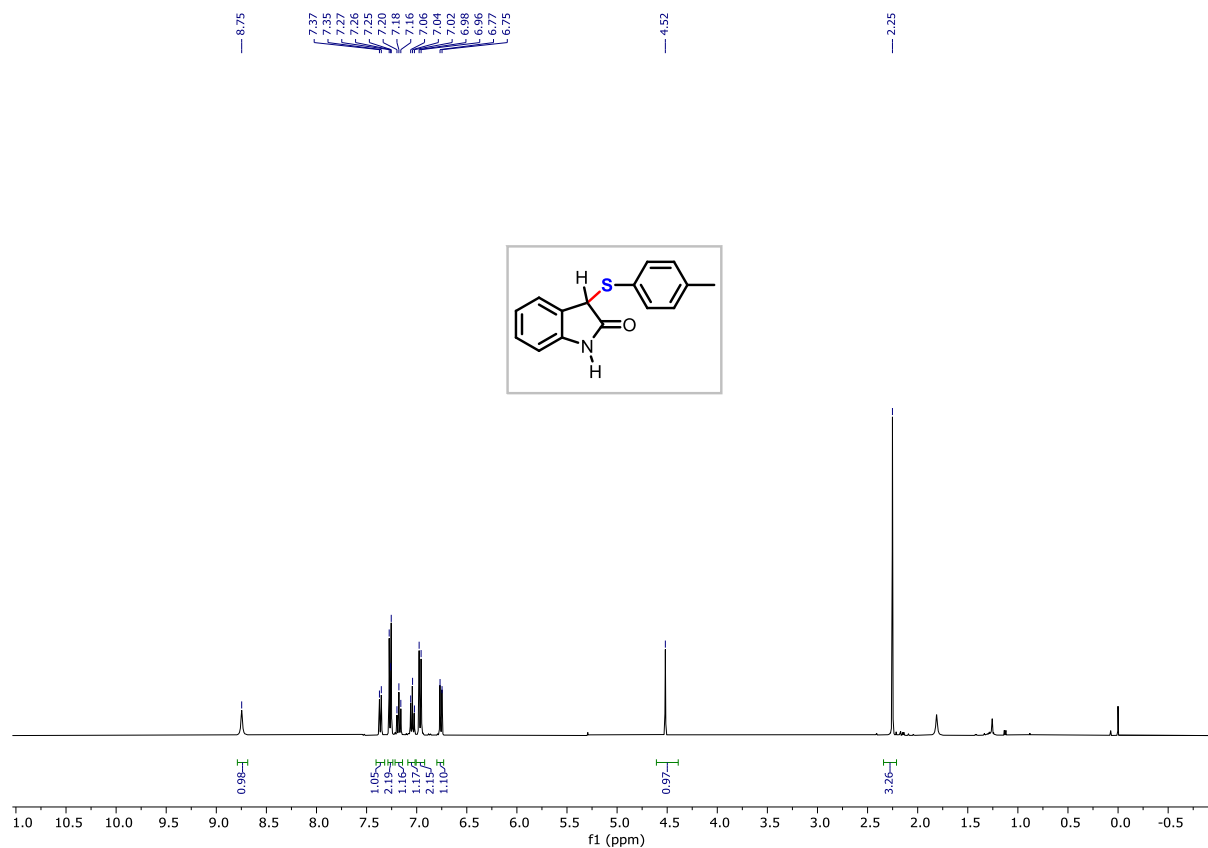

$^{13}\text{C}\{^1\text{H}\}$  NMR (126 MHz  $\text{CDCl}_3$ )

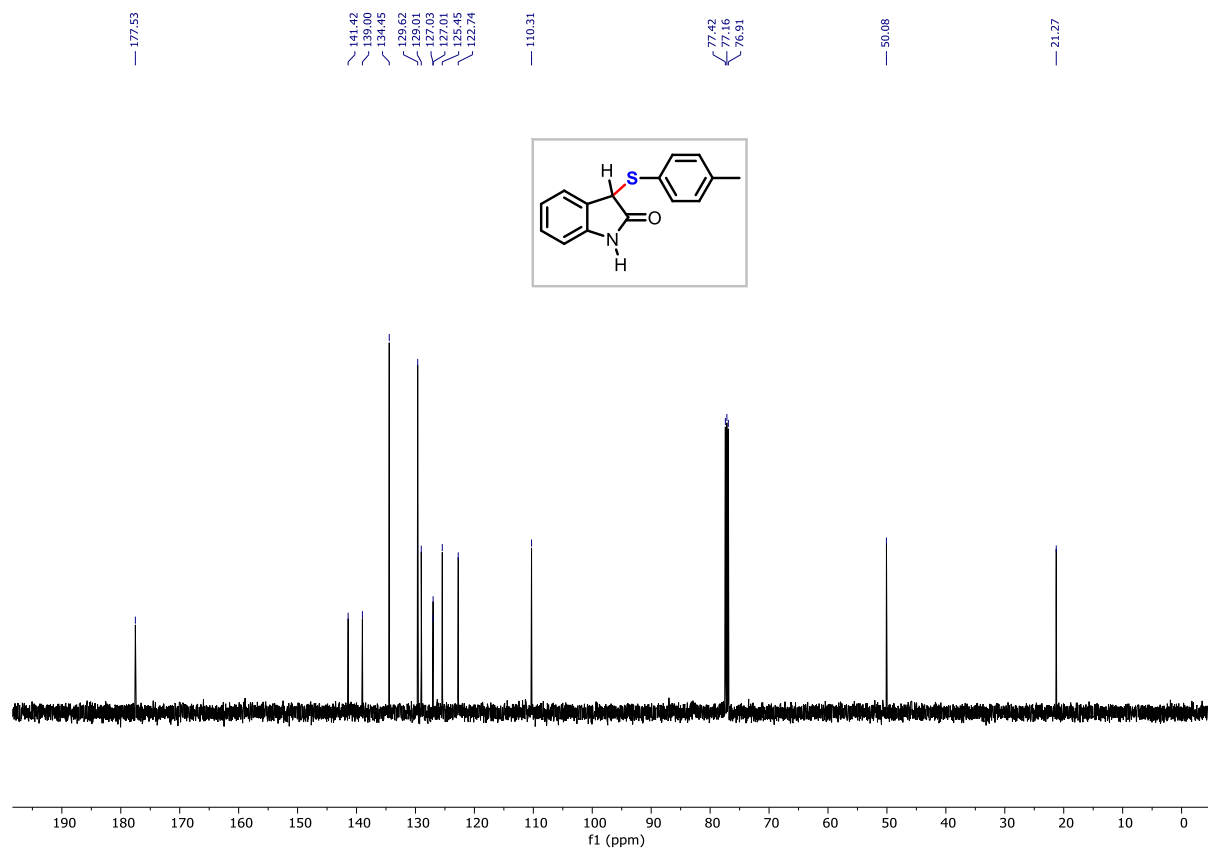

### 3-(o-Tolylthio) indolin-2-one (4g)

$^1\text{H}$  NMR (500 MHz,  $\text{CDCl}_3$ )

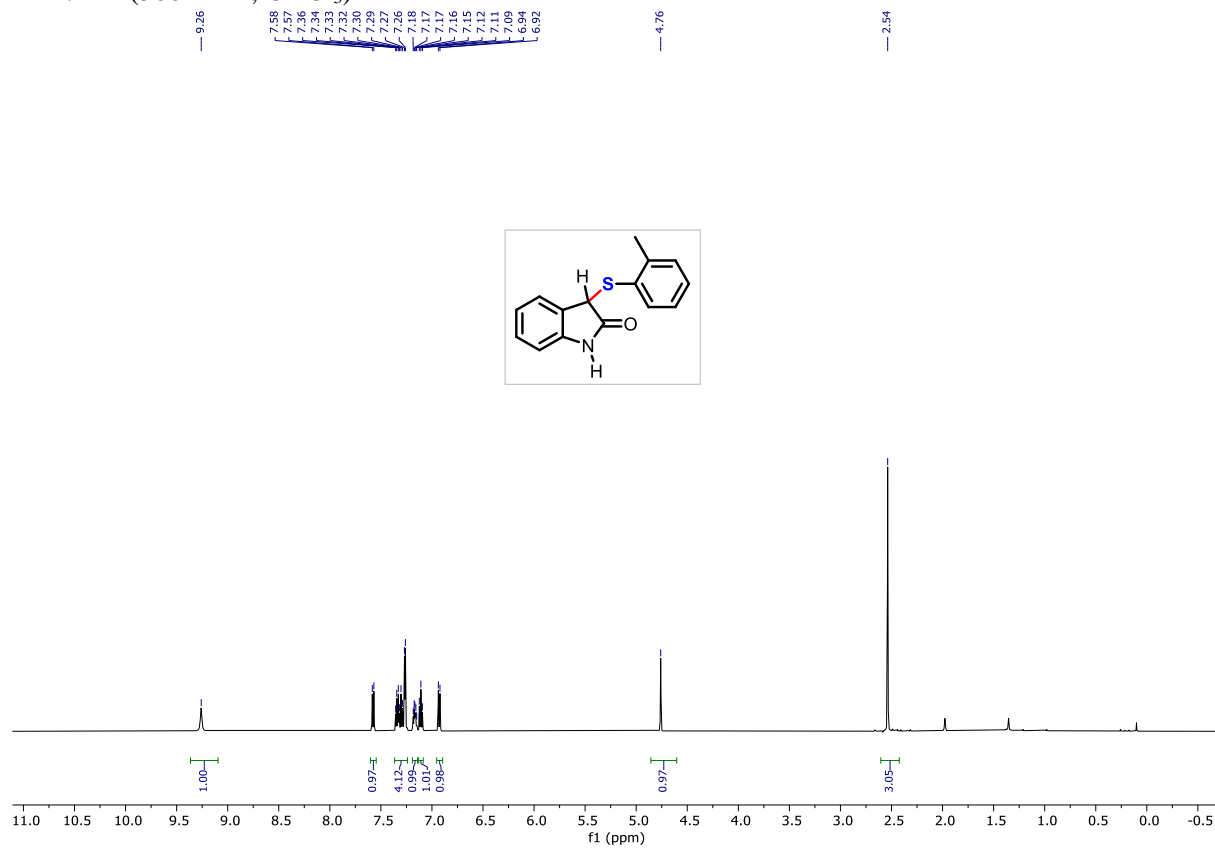

$^{13}\text{C}\{^1\text{H}\}$  NMR (126 MHz  $\text{CDCl}_3$ )

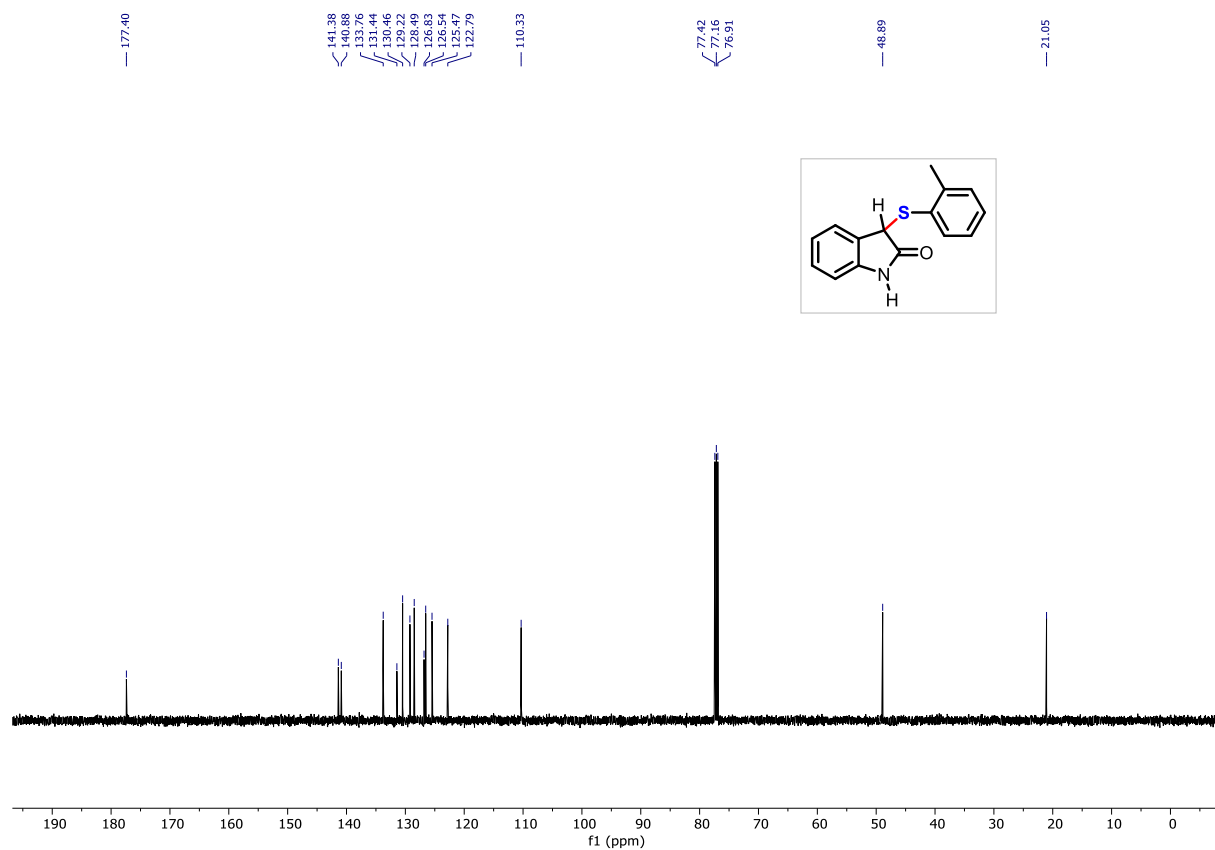

### 3-((4-Methoxyphenyl) thio) indolin-2-one (4h)

$^1\text{H}$  NMR (500 MHz,  $\text{CDCl}_3$ )

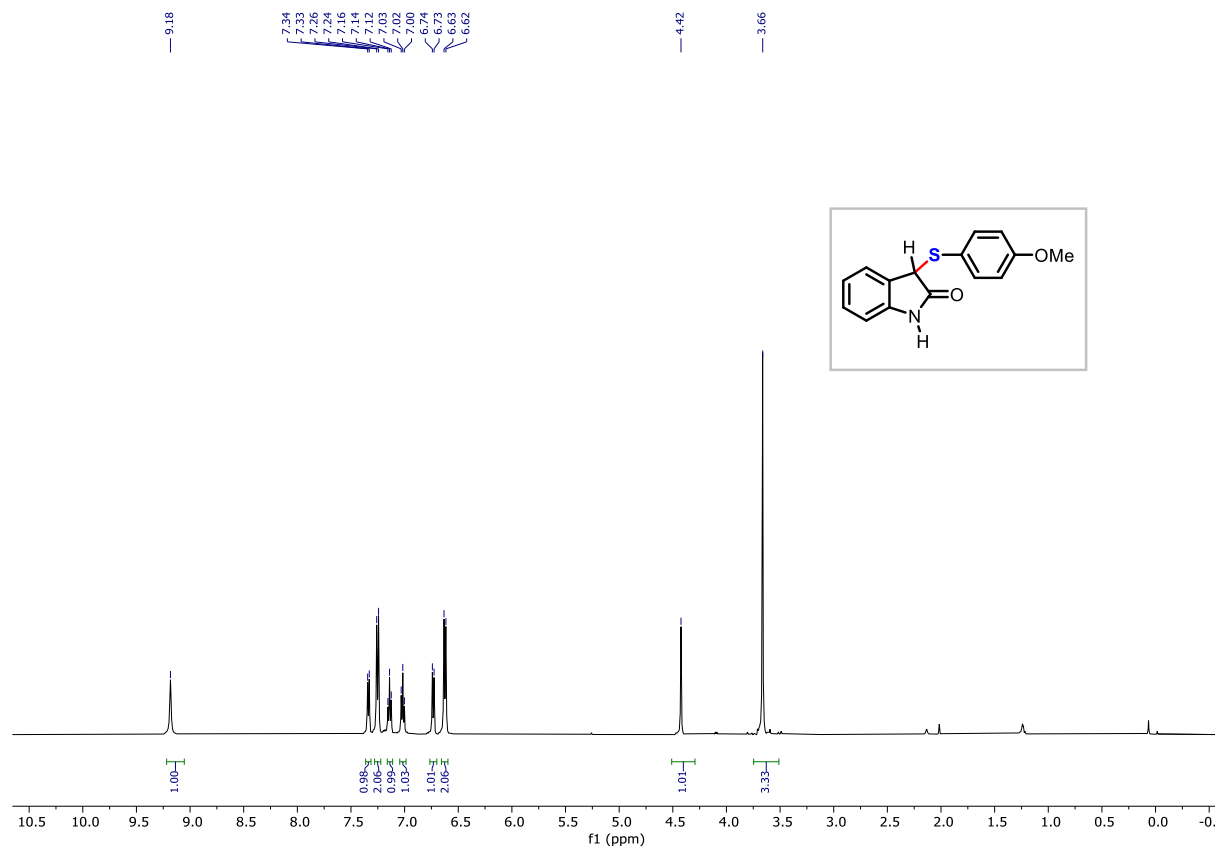

$^{13}\text{C}\{^1\text{H}\}$  NMR (126 MHz  $\text{CDCl}_3$ )

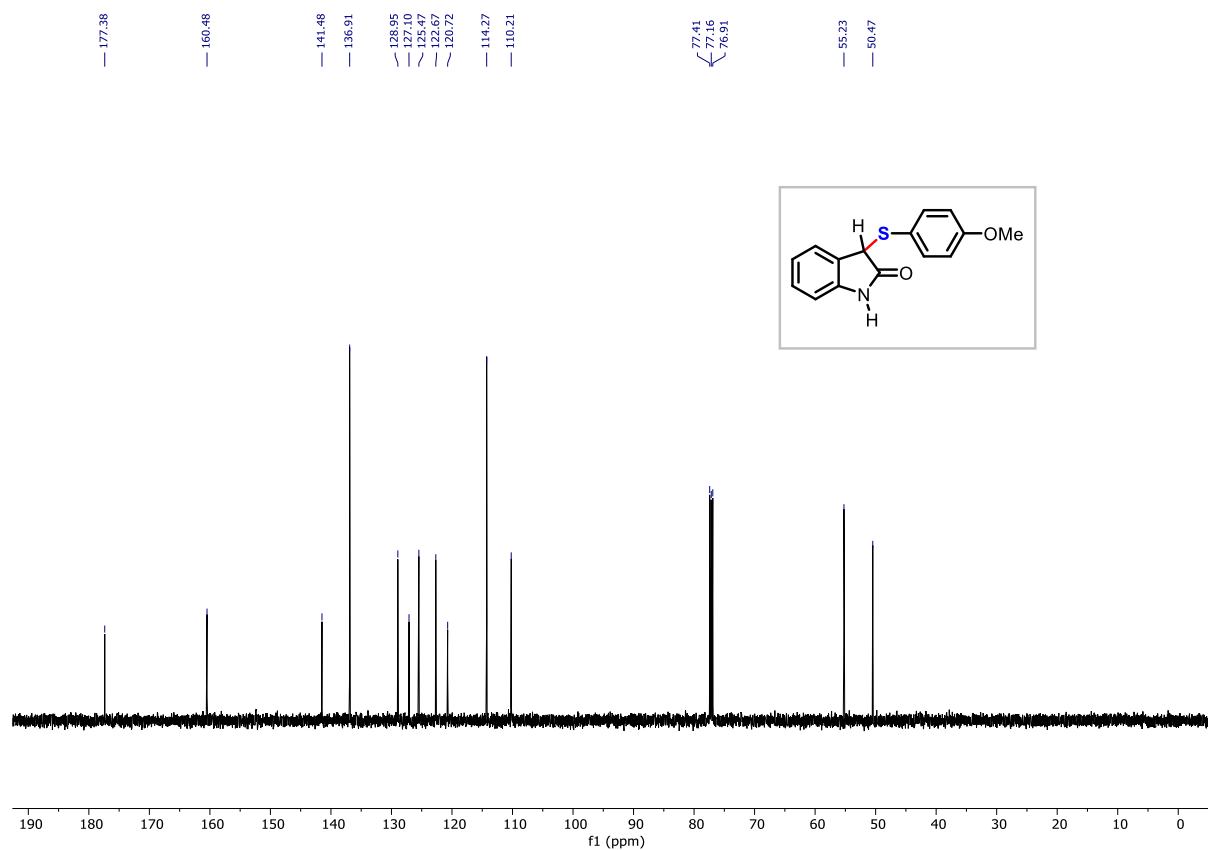

### 3-(Naphthalen-2-ylthio) indolin-2-one (4i)

$^1\text{H}$  NMR (500 MHz,  $\text{CDCl}_3$ )

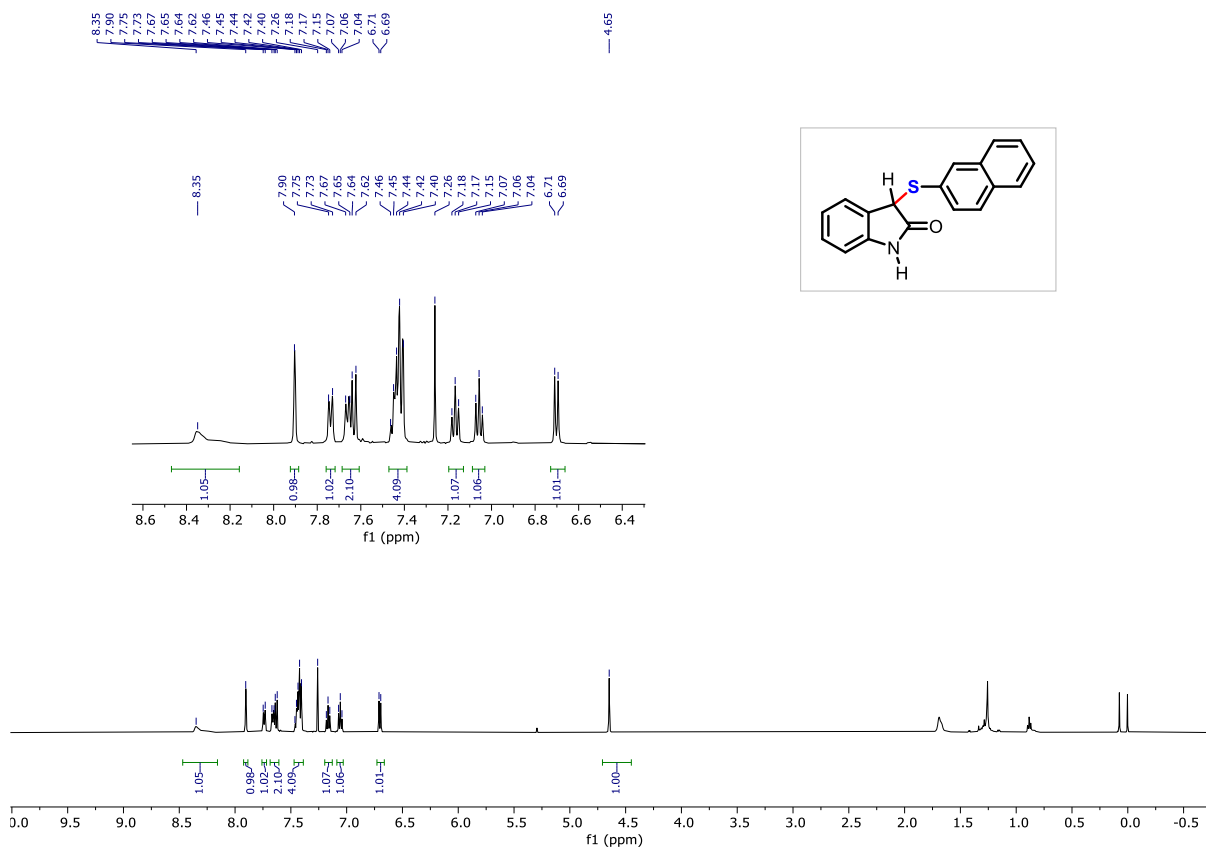

$^{13}\text{C}\{^1\text{H}\}$  NMR (126 MHz  $\text{CDCl}_3$ )

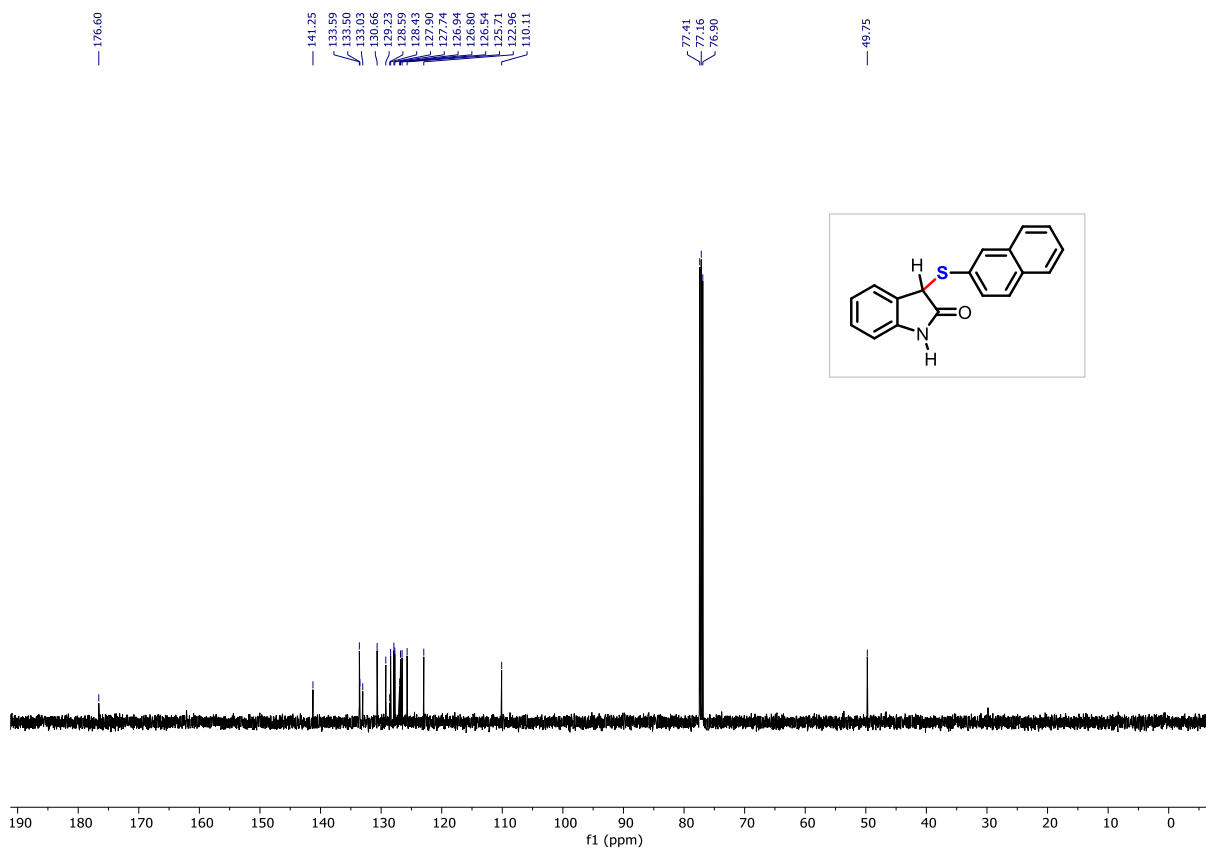

### 3-((4-Chlorophenyl) thio) indolin-2-one (4j)

$^1\text{H}$  NMR (400 MHz,  $\text{CDCl}_3$ )

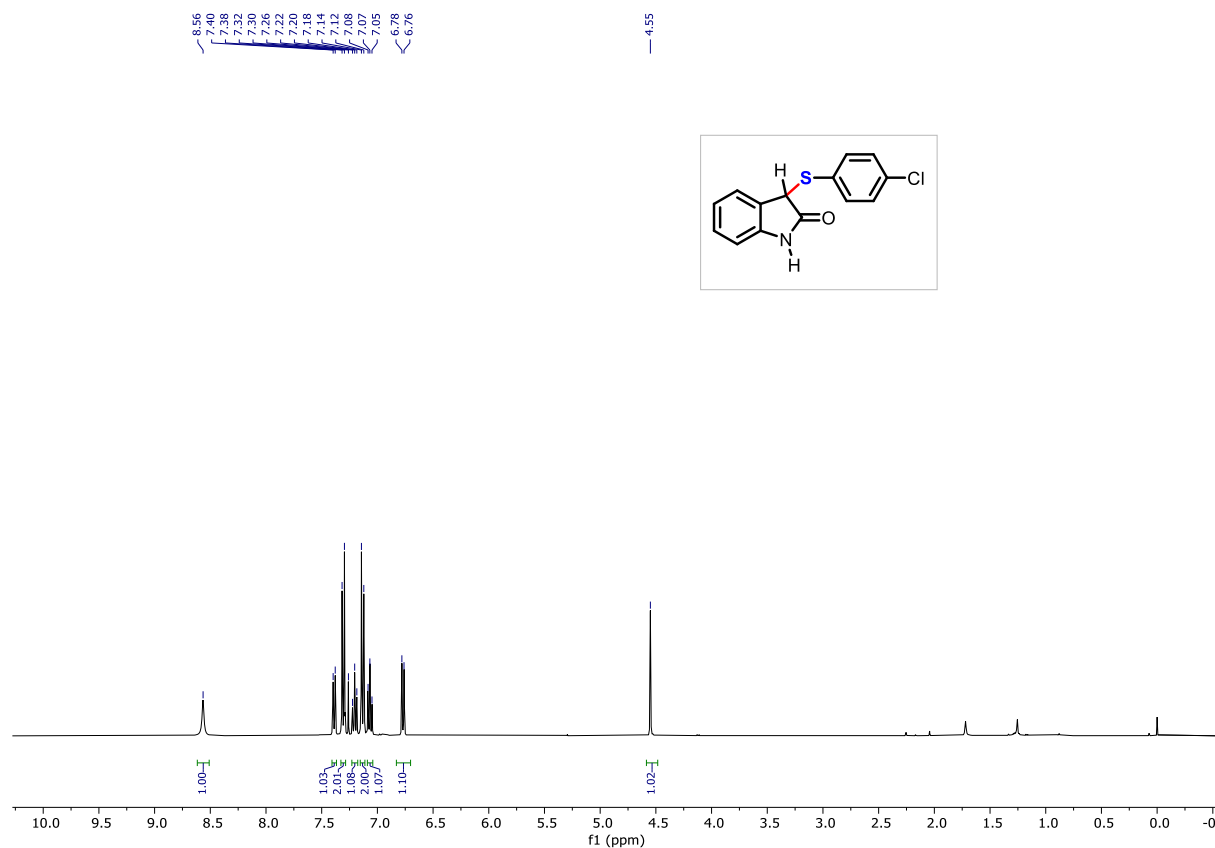

$^{13}\text{C}\{^1\text{H}\}$  NMR (126 MHz  $\text{CDCl}_3$ )

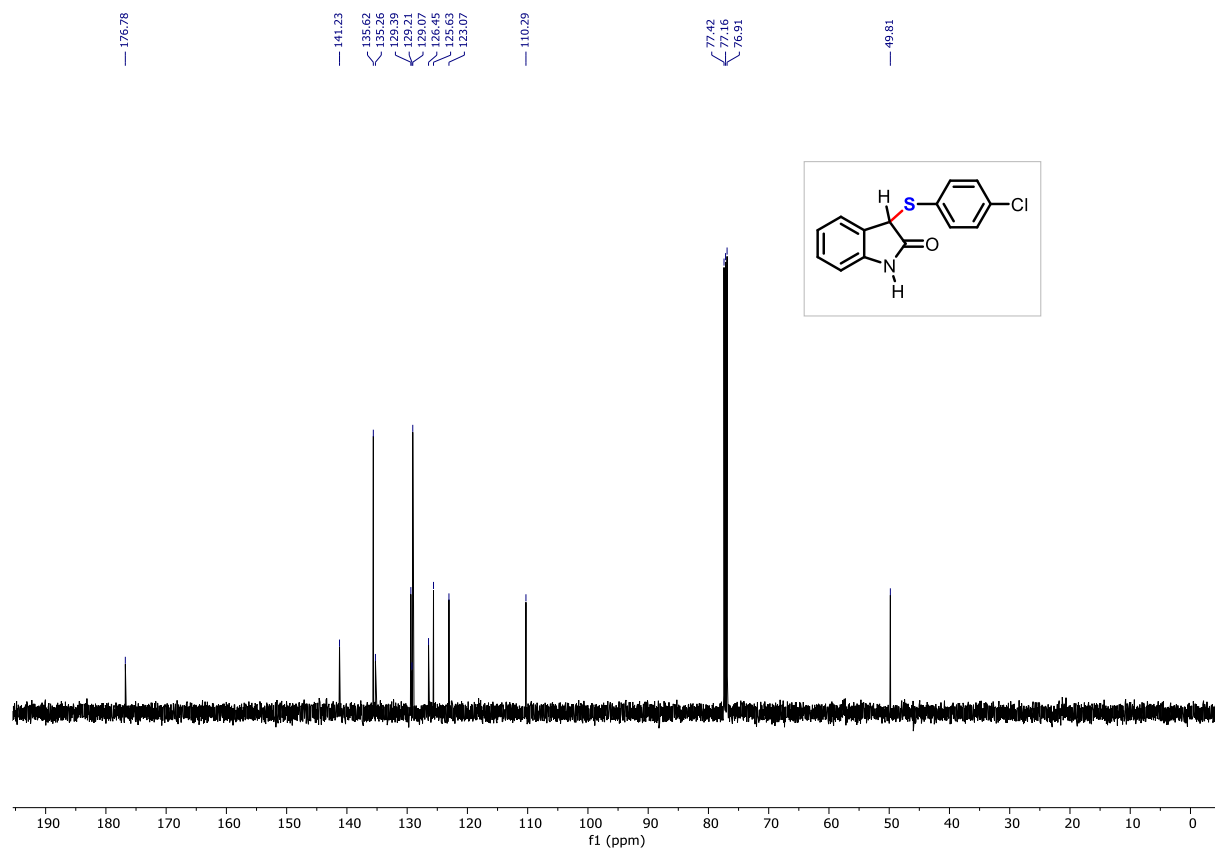

### 3-((4-Bromophenyl) thio) indolin-2-one (4k)

$^1\text{H}$  NMR (500 MHz,  $\text{CDCl}_3$ )

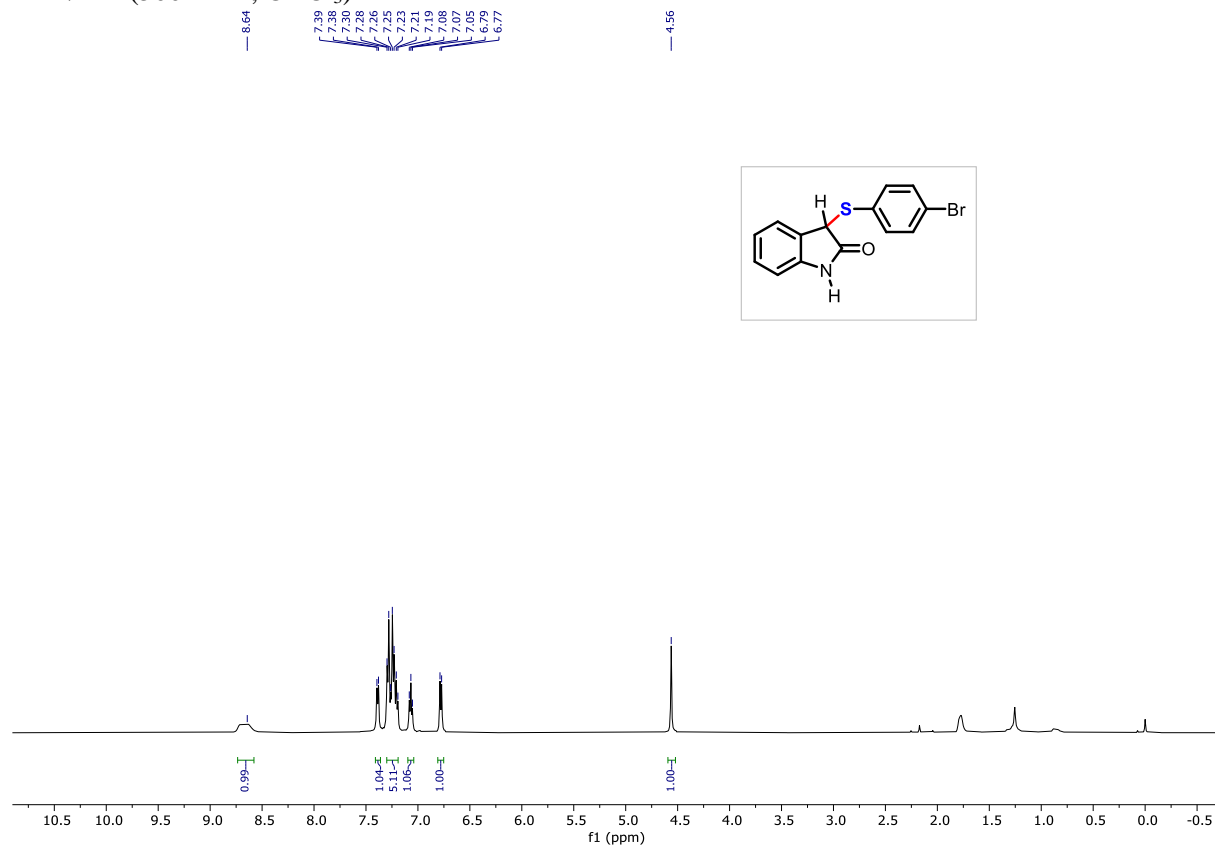

$^{13}\text{C}\{^1\text{H}\}$  NMR (126 MHz  $\text{CDCl}_3$ )

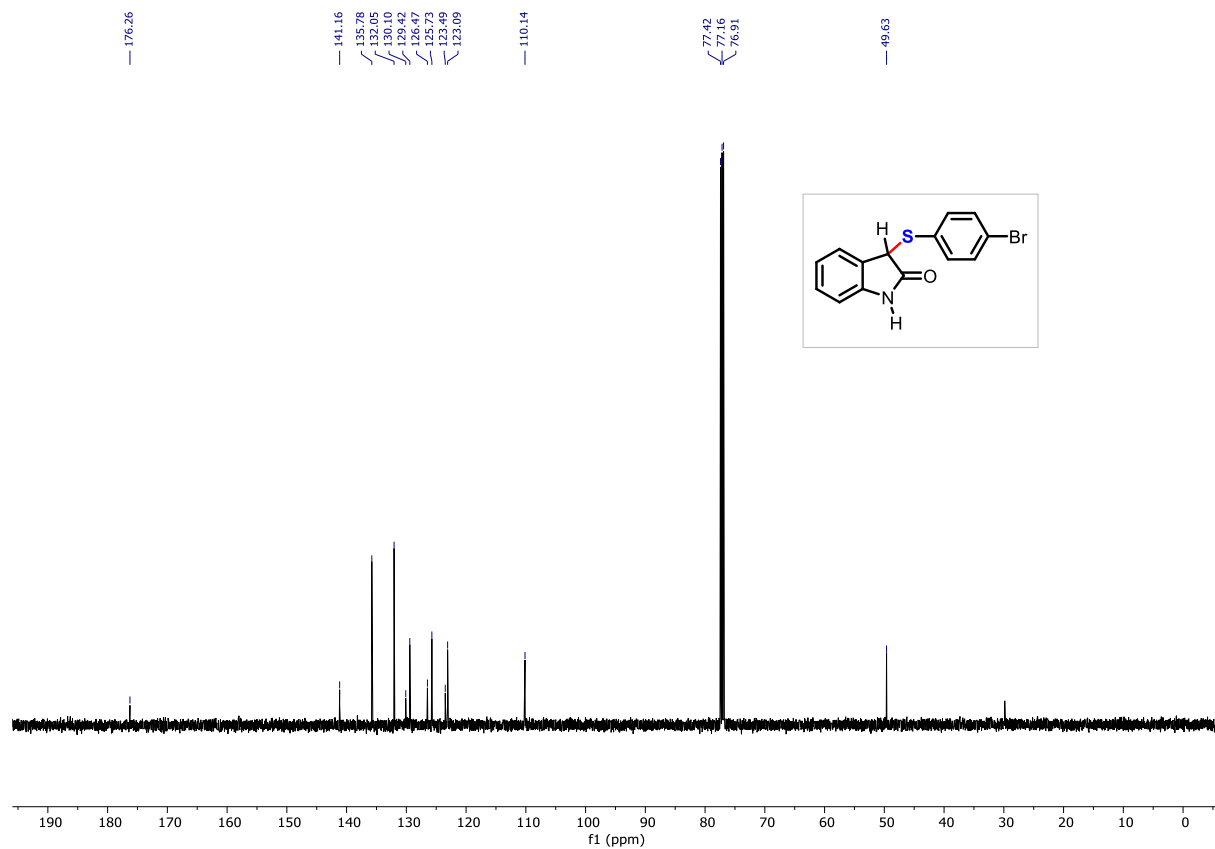



# 4-Bromobenzyl (butyl)sulfane (4l)

$^1\text{H}$  NMR (500 MHz,  $\text{CDCl}_3$ )

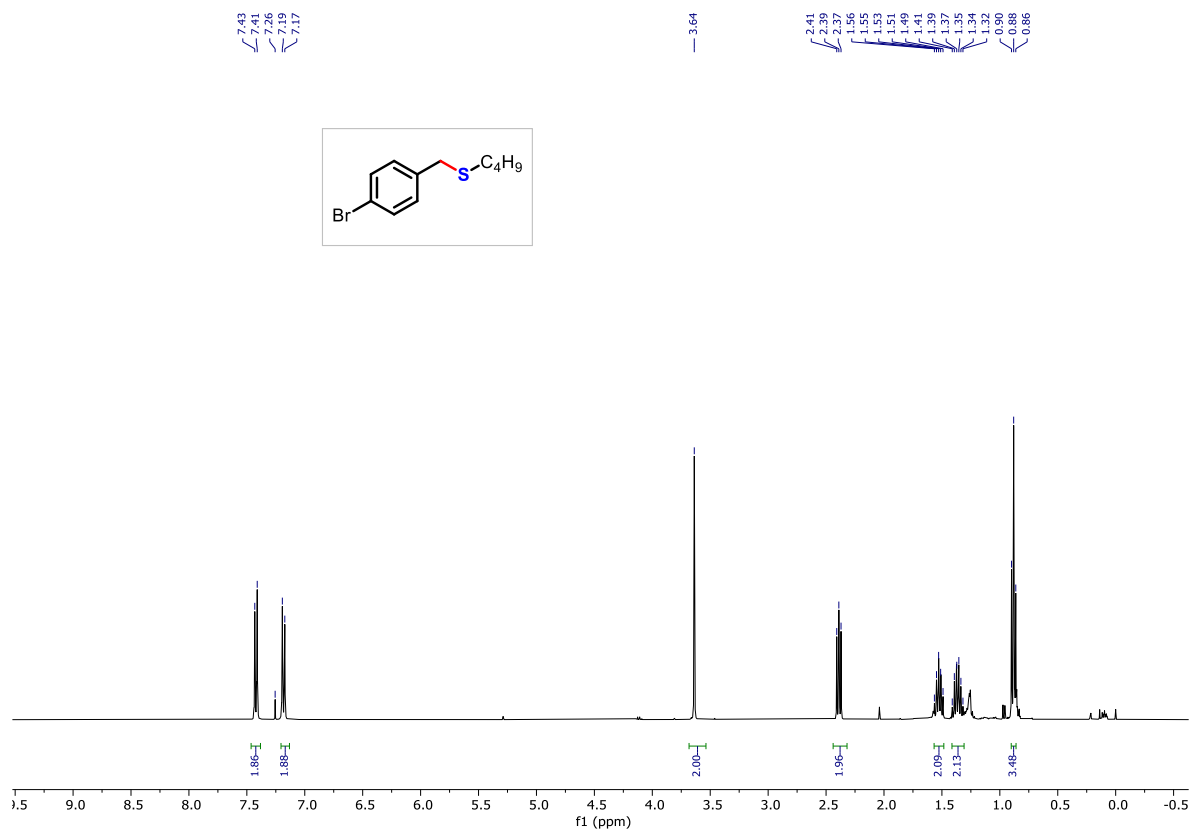

$^{13}\text{C}\{^1\text{H}\}$  NMR (126 MHz  $\text{CDCl}_3$ )

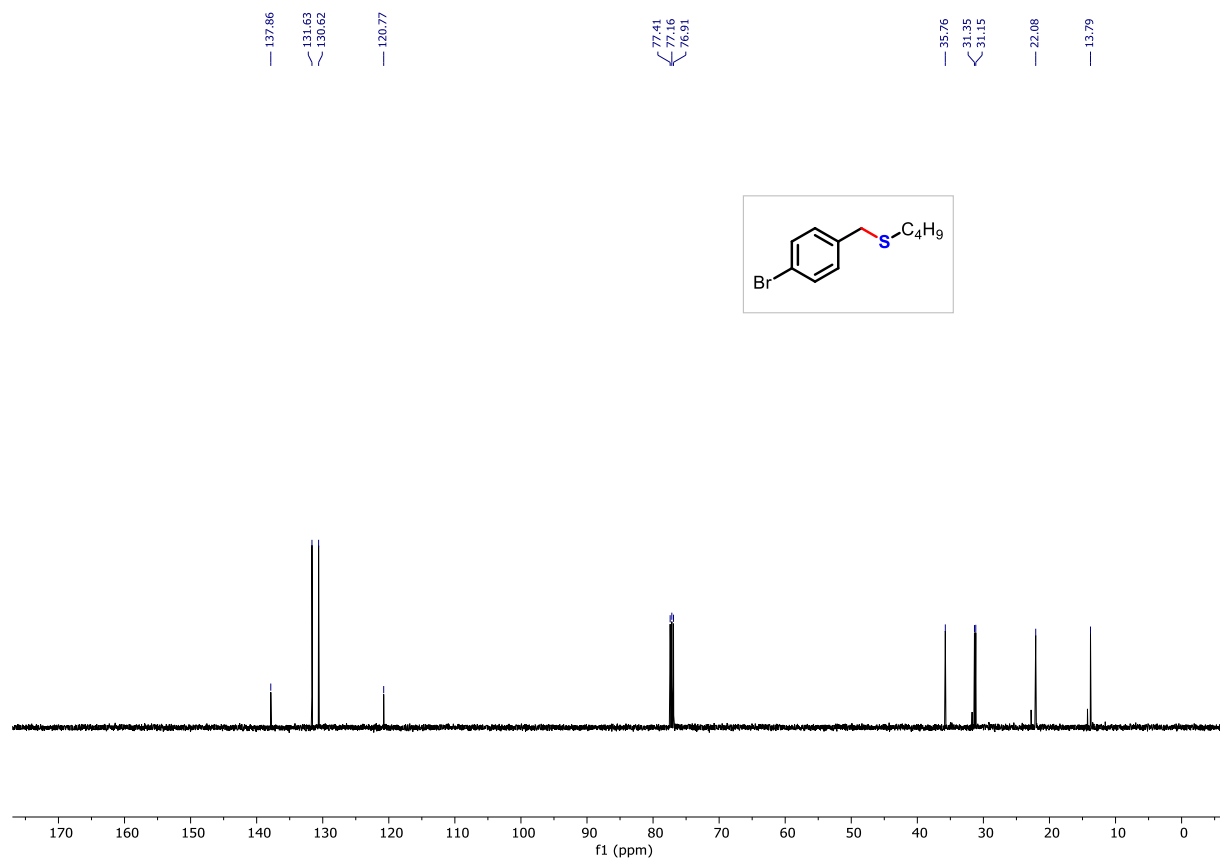

# Methyl 3-((4-bromobenzyl) thio) propanoate (4m)

$^1\text{H}$  NMR (500 MHz,  $\text{CDCl}_3$ )

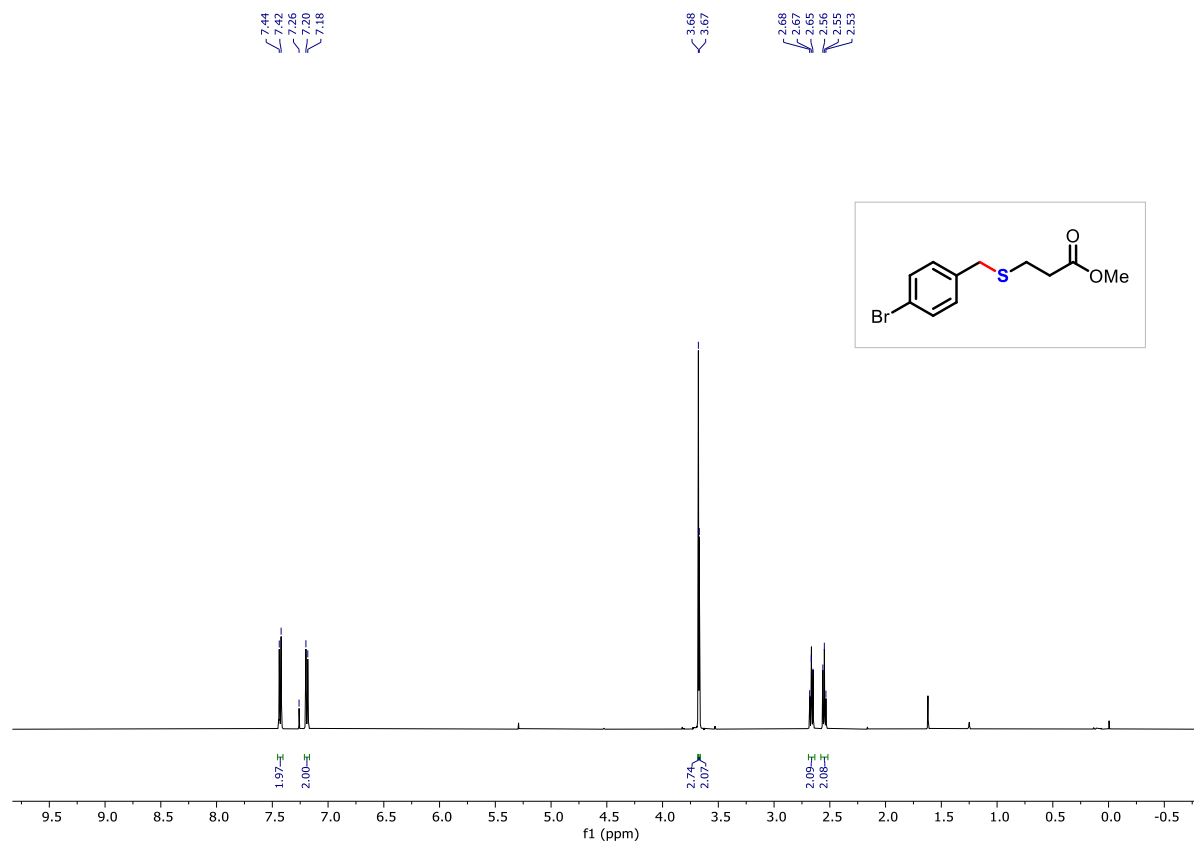

$^{13}\text{C}\{^1\text{H}\}$  NMR (126 MHz  $\text{CDCl}_3$ )

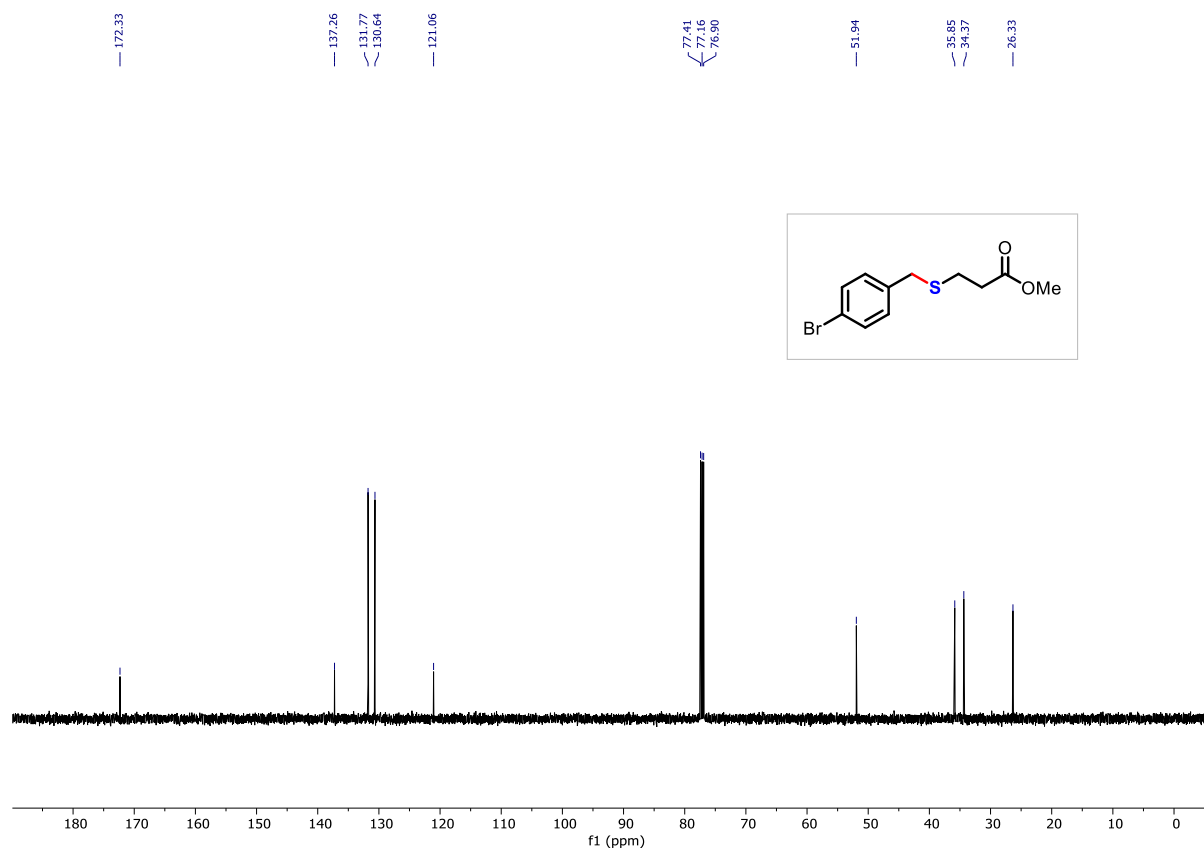

# (4-Bromobenzyl) (*p*-tolyl) sulfane (4n)

$^1\text{H}$  NMR (500 MHz,  $\text{CDCl}_3$ )

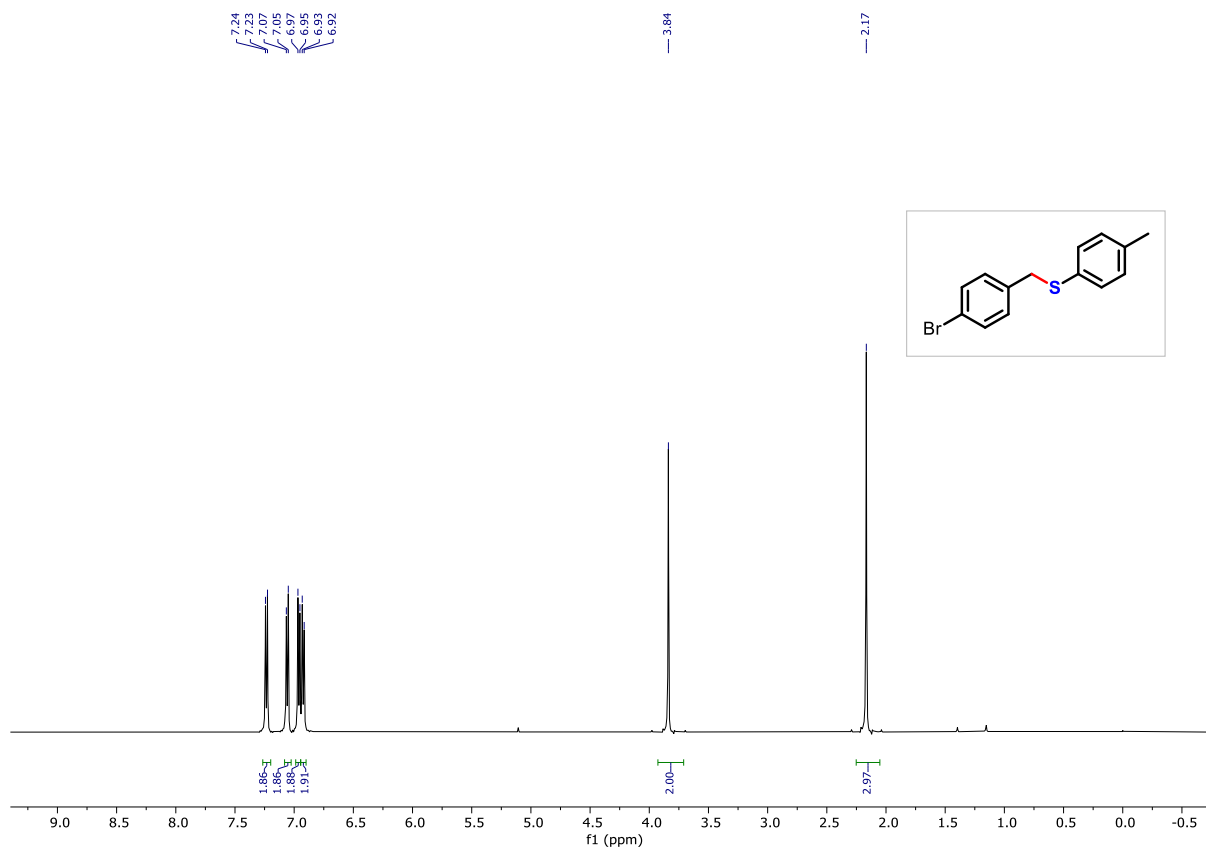

$^{13}\text{C}\{^1\text{H}\}$  NMR (126 MHz  $\text{CDCl}_3$ )

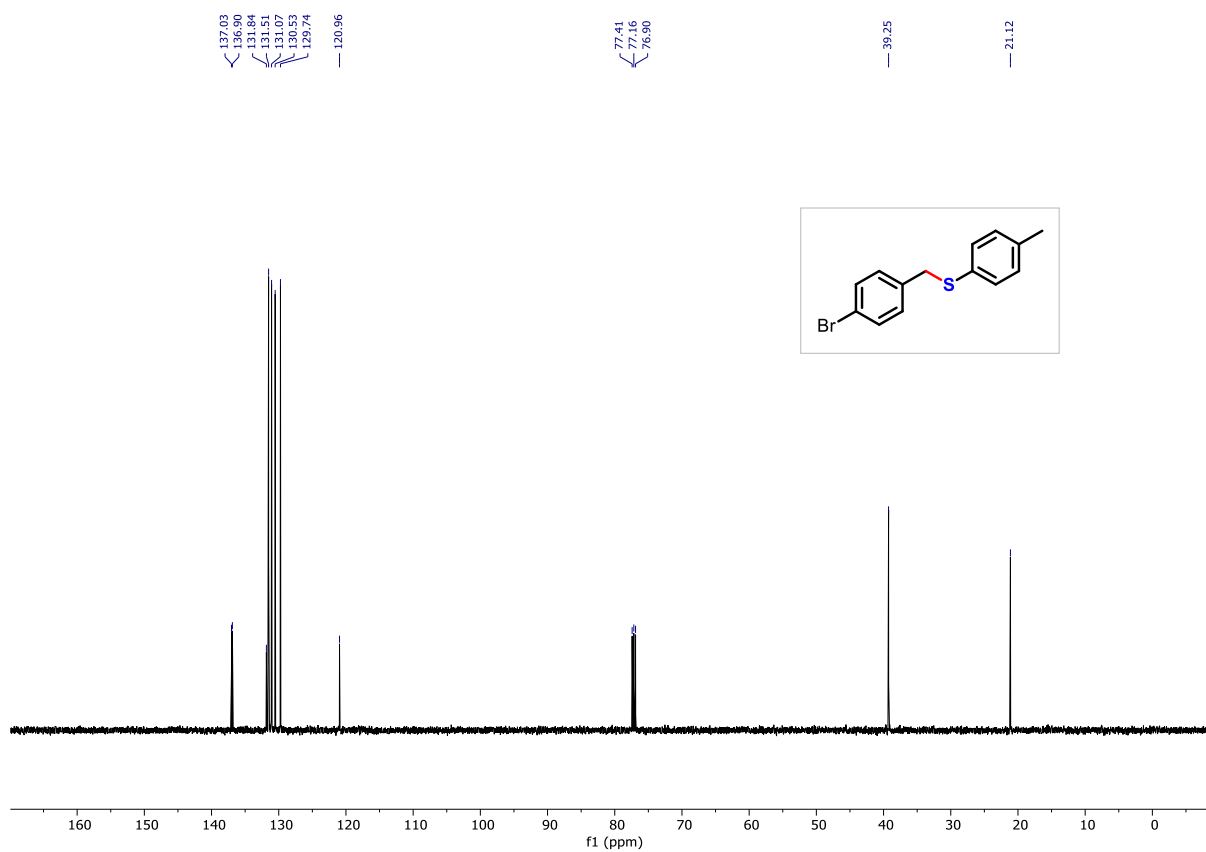

# (4-Bromobenzyl) (4-chlorophenyl) sulfane (4o)

$^1\text{H}$  NMR (500 MHz,  $\text{CDCl}_3$ )

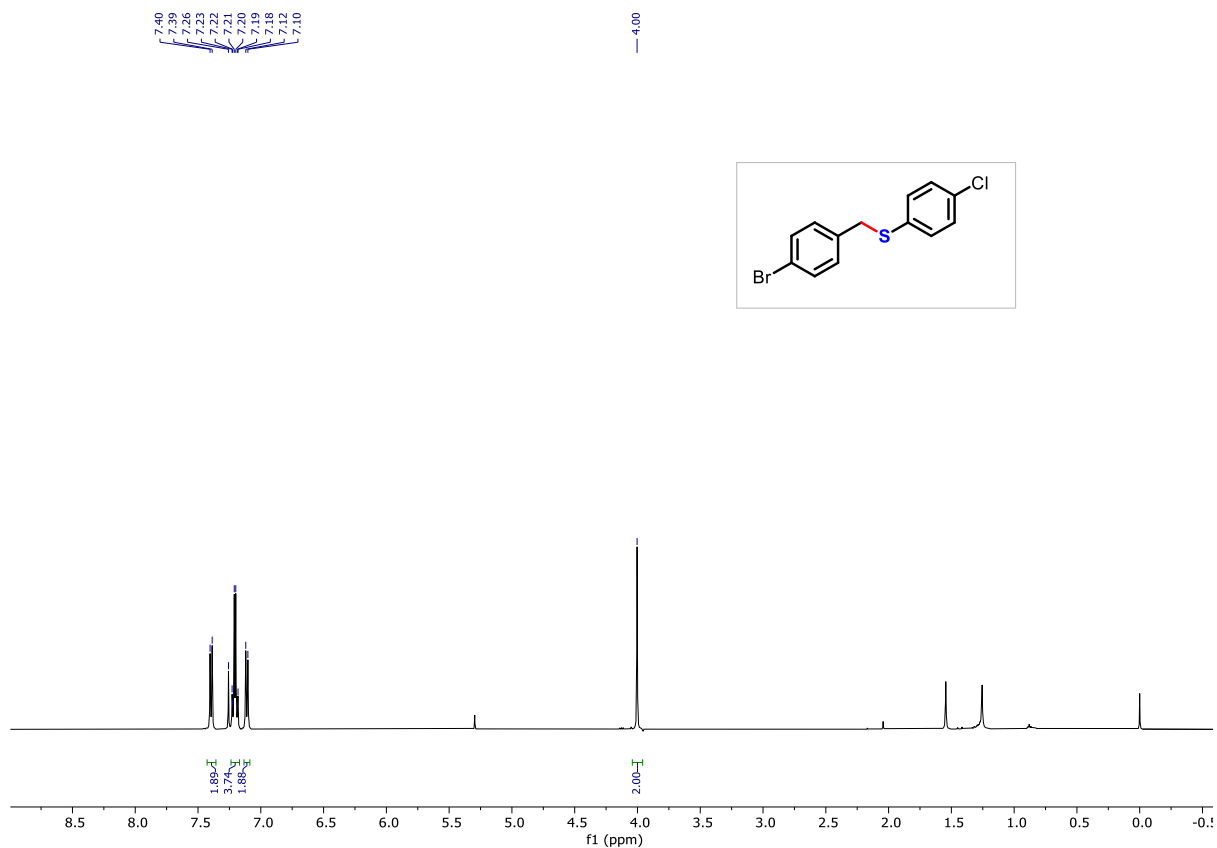

$^{13}\text{C}\{^1\text{H}\}$  NMR (126 MHz  $\text{CDCl}_3$ )

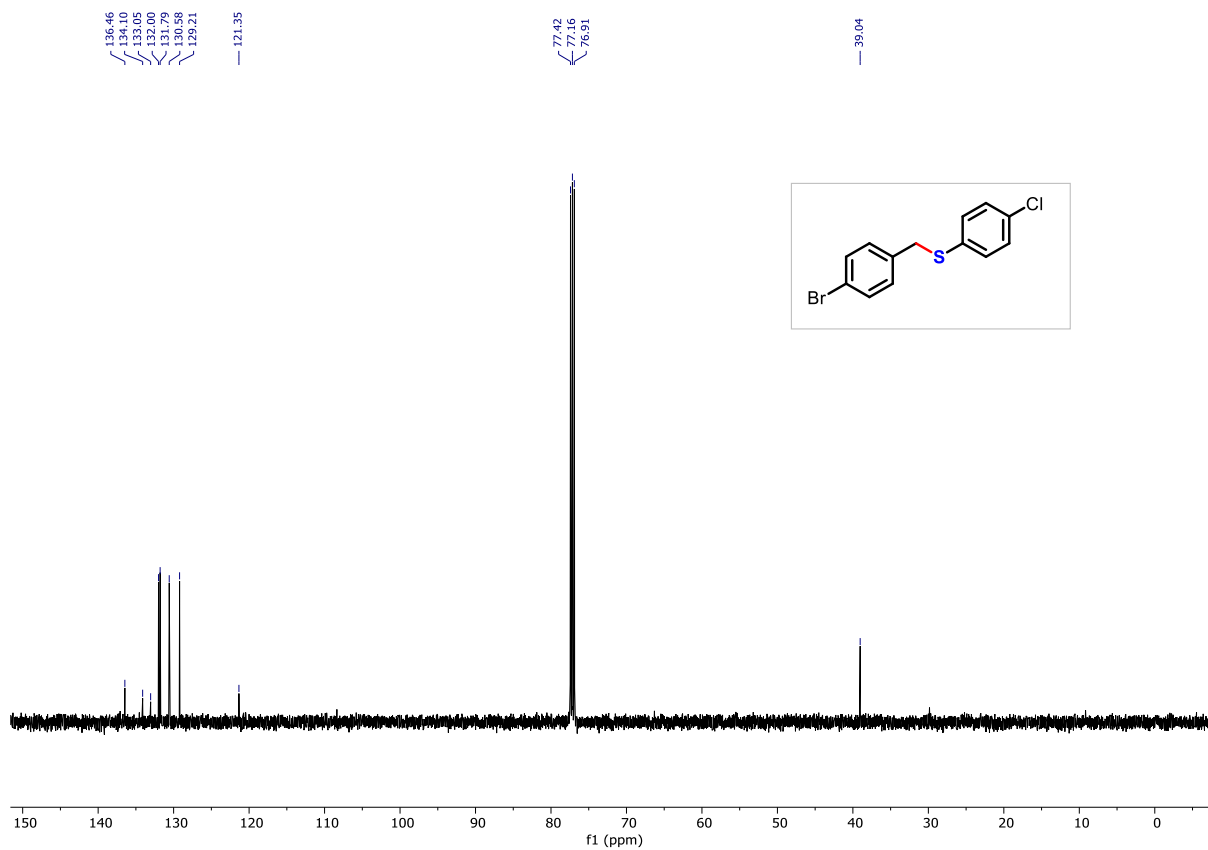

# (4-Bromobenzyl) (naphthalen-2-yl) sulfane (4p)

$^1\text{H}$  NMR (500 MHz,  $\text{CDCl}_3$ )

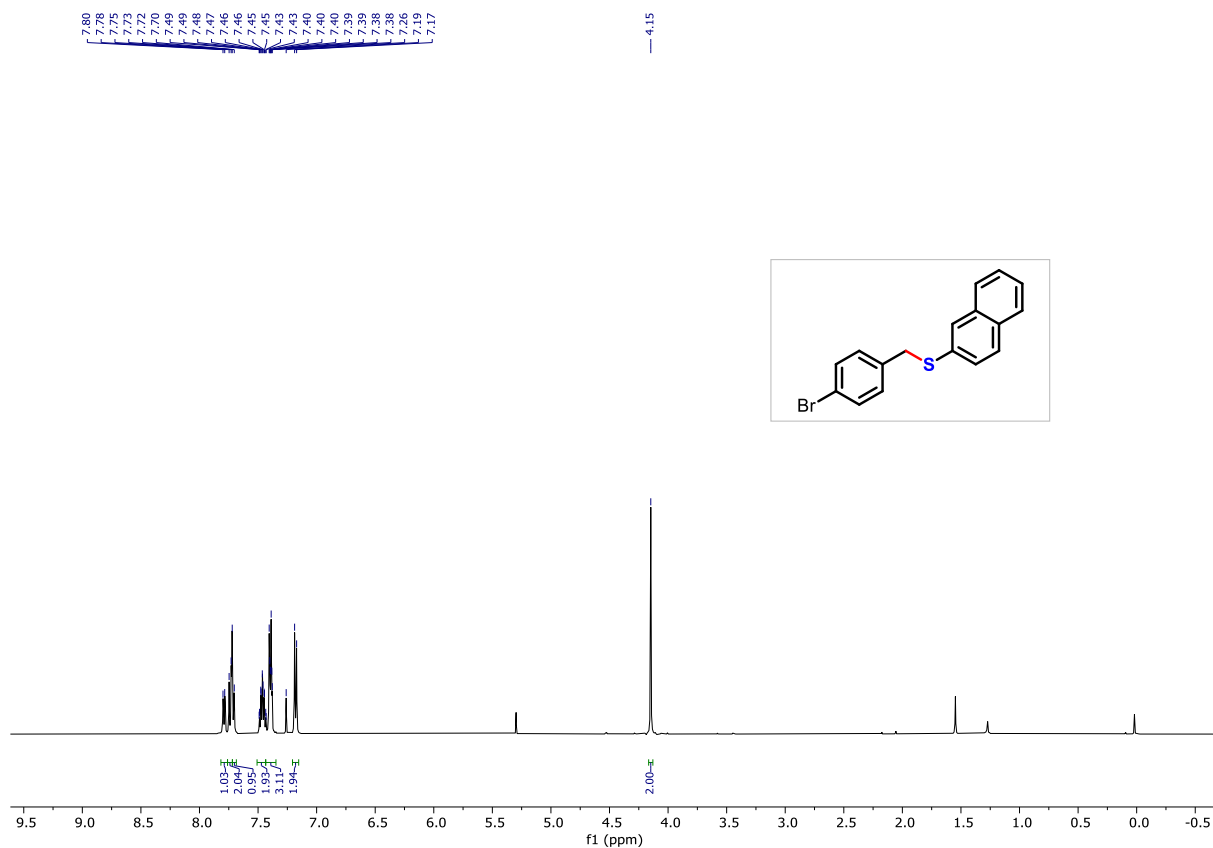

$^{13}\text{C}\{^1\text{H}\}$  NMR (126 MHz  $\text{CDCl}_3$ )

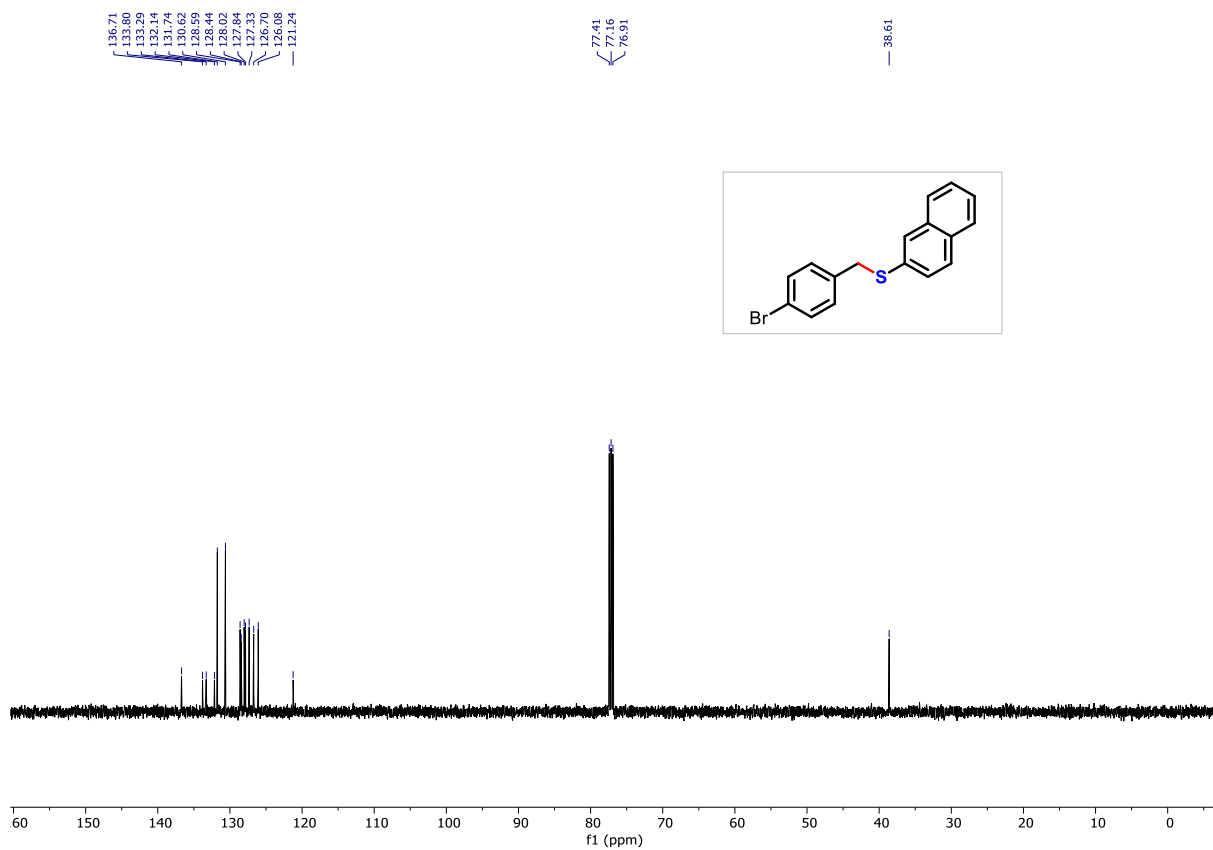

### 3,3-Bis (butylthio) indolin-2-one (5a)

$^1\text{H}$  NMR (500 MHz,  $\text{CDCl}_3$ )

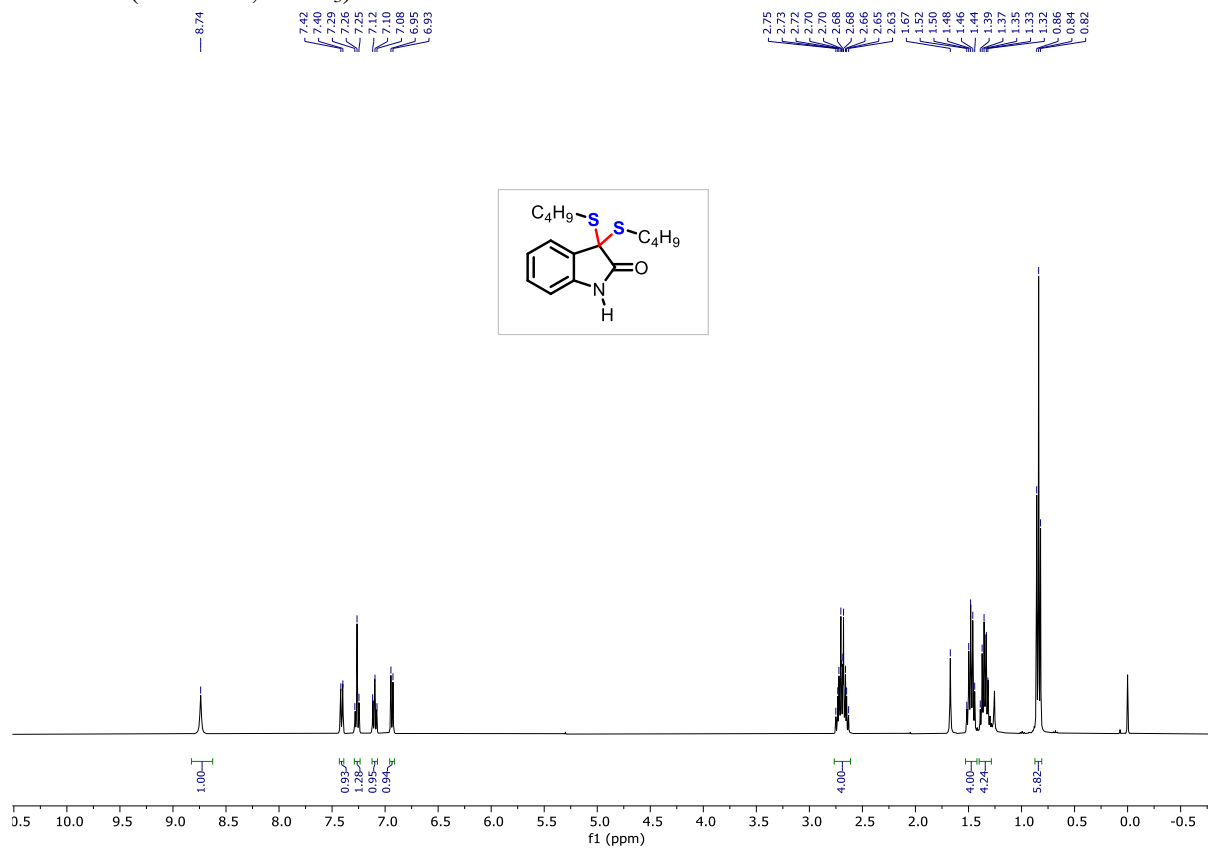

$^{13}\text{C}\{^1\text{H}\}$  NMR (126 MHz  $\text{CDCl}_3$ )

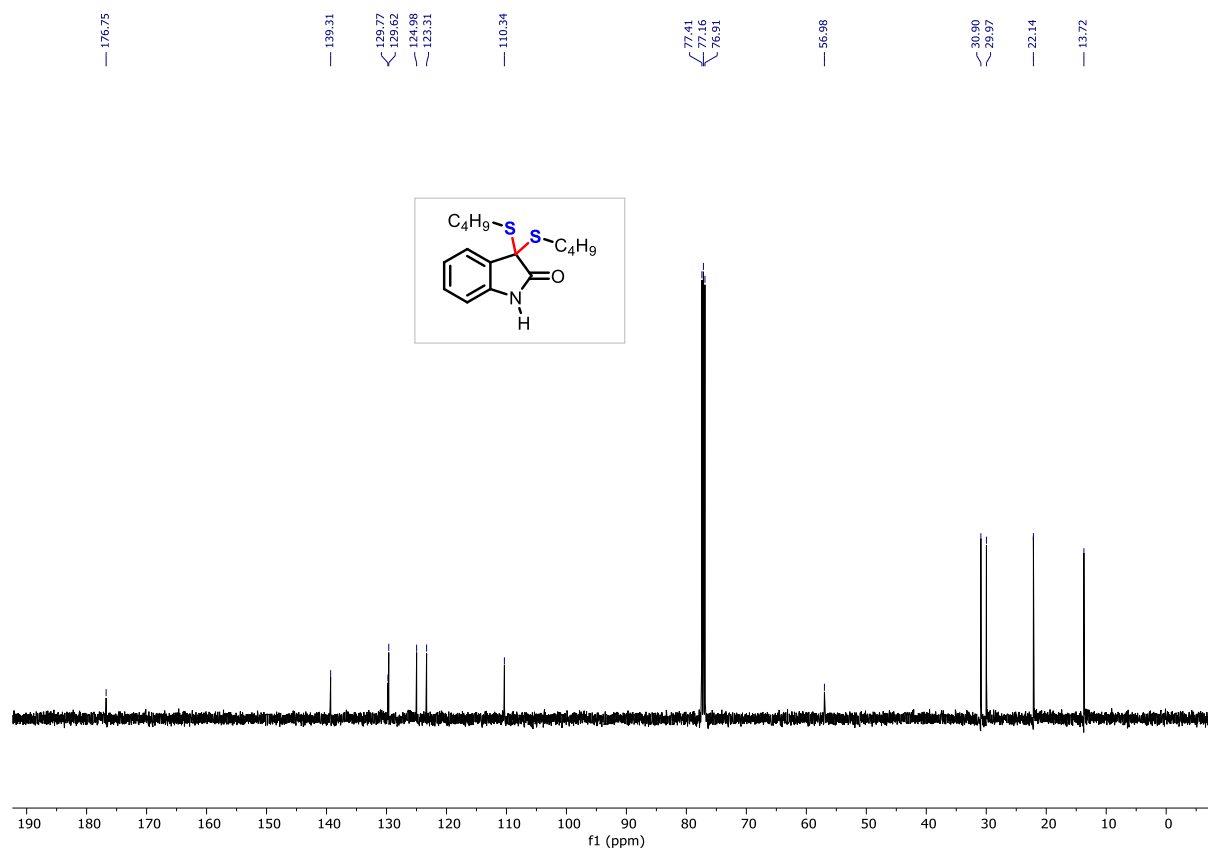

### 3-(Butylthio)-5,7-dichloroindolin-2-one (6a)

$^1\text{H}$  NMR (500 MHz,  $\text{CDCl}_3$ )

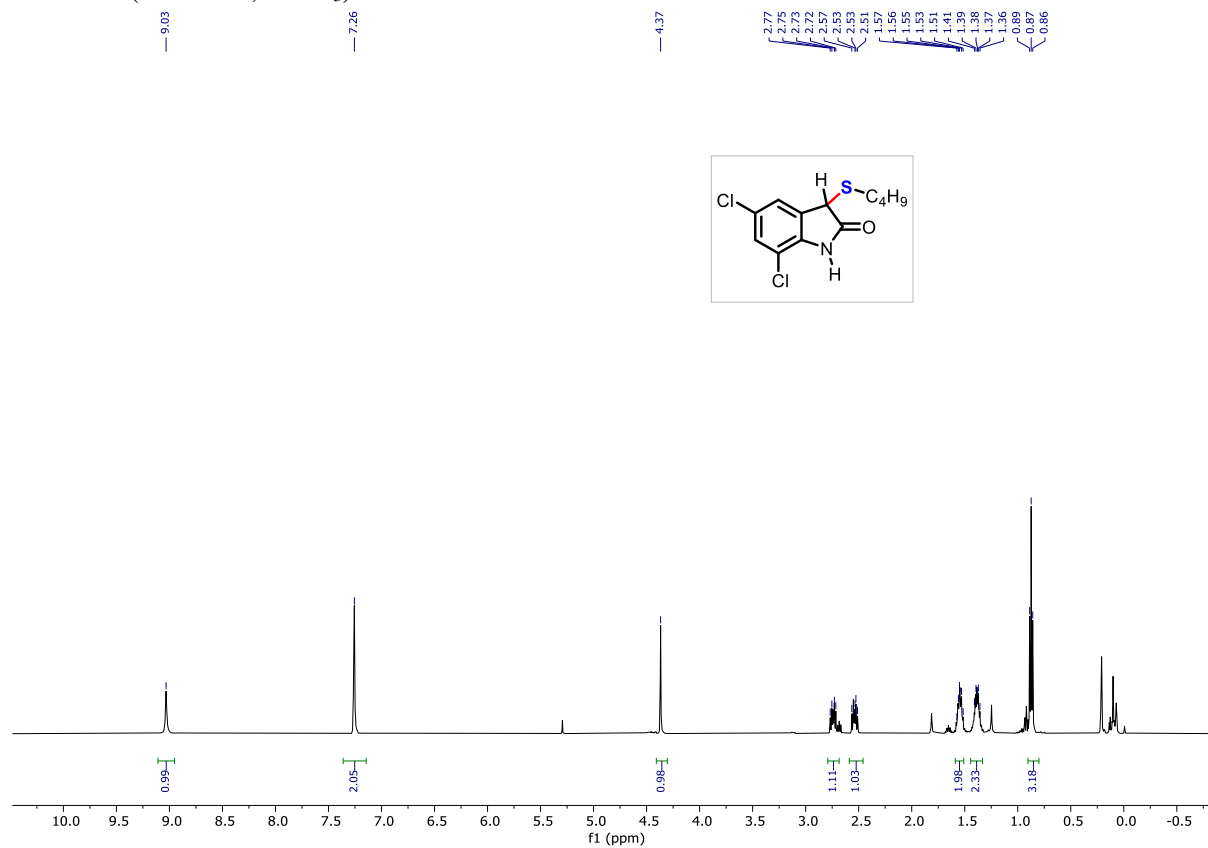

$^{13}\text{C}\{^1\text{H}\}$  NMR (126 MHz  $\text{CDCl}_3$ )

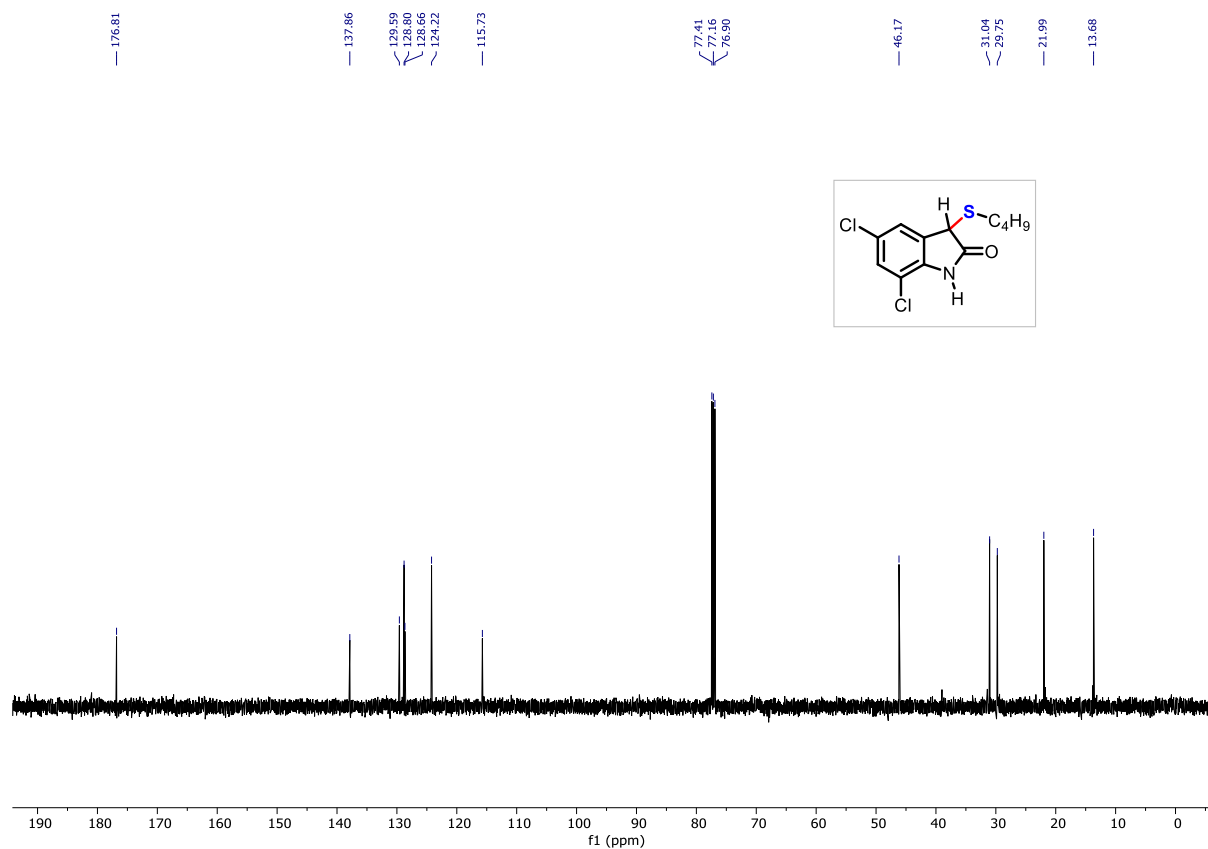

### 3-(Butylthio)-5-chloroindolin-2-one (6b)

$^1\text{H}$  NMR (500 MHz,  $\text{CDCl}_3$ )

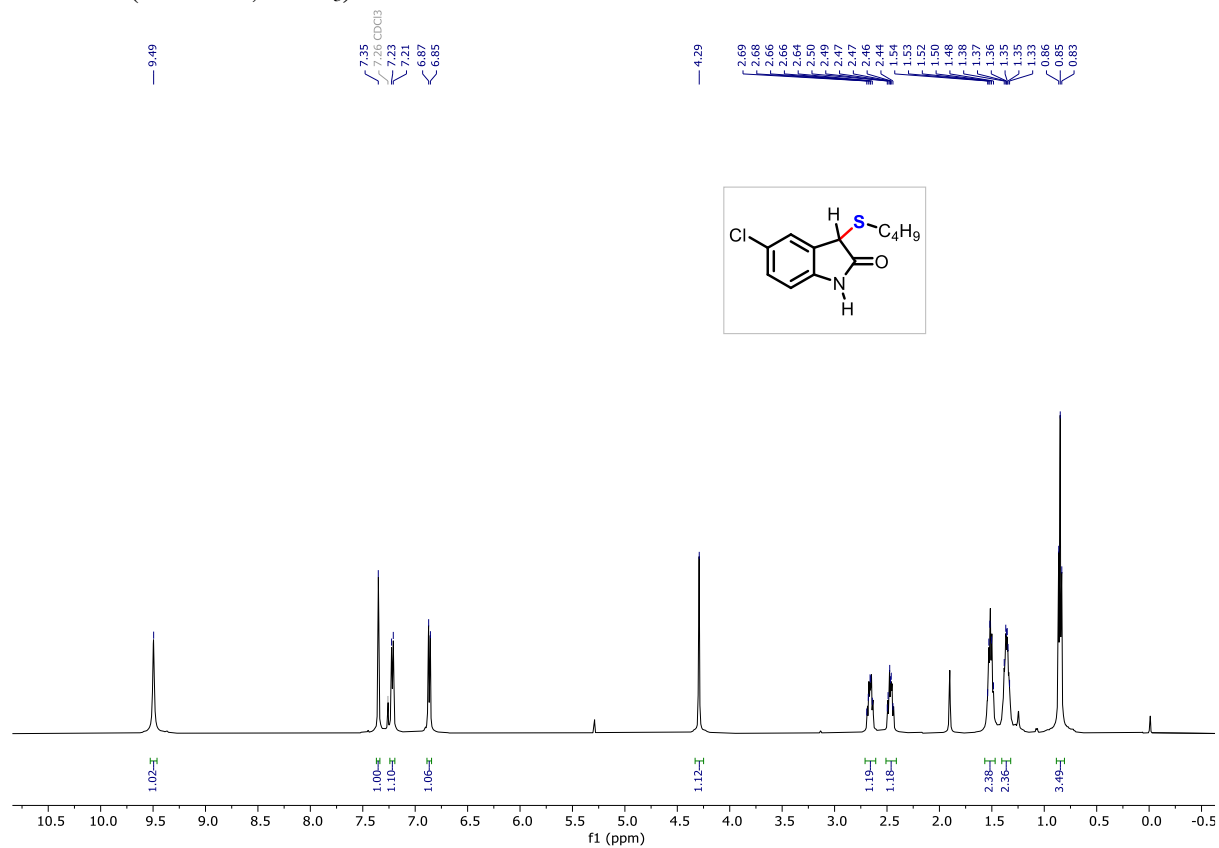

$^{13}\text{C}\{^1\text{H}\}$  NMR (126 MHz  $\text{CDCl}_3$ )

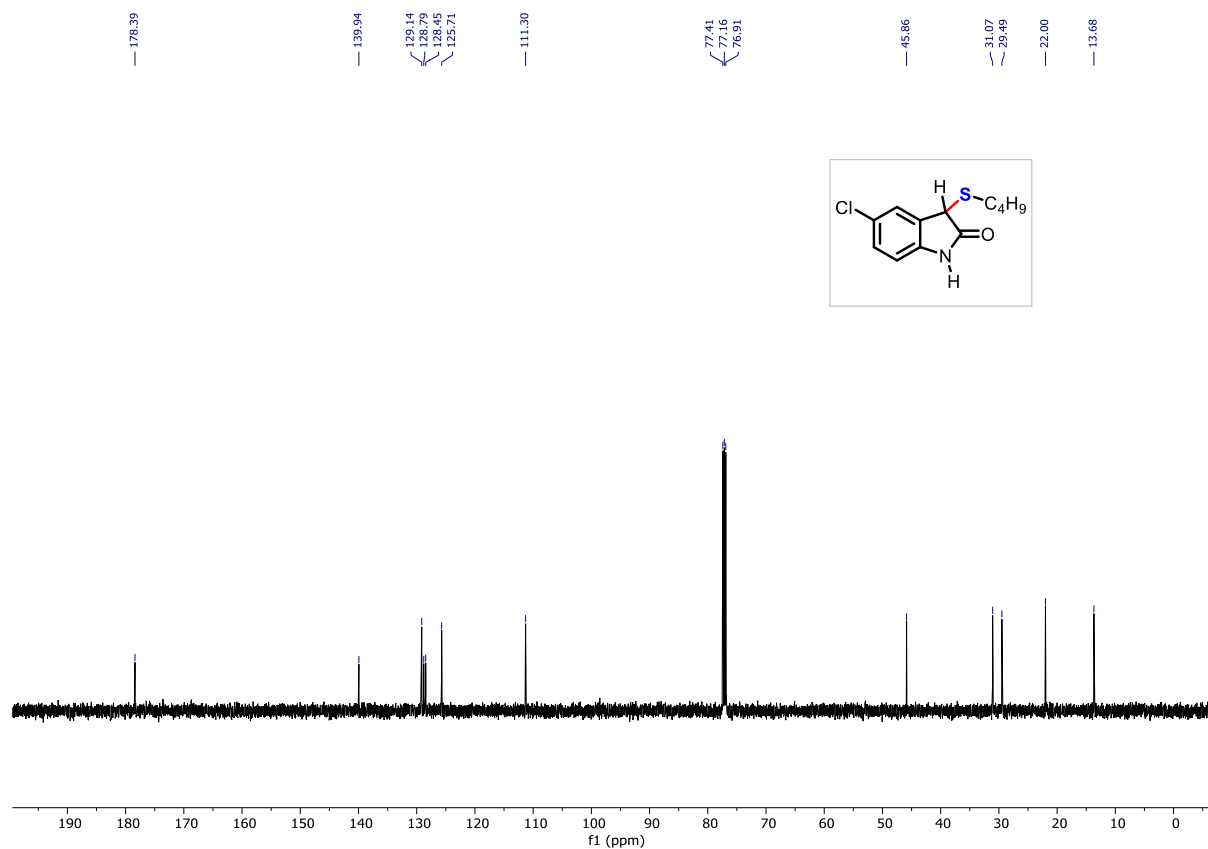



# 5-Bromo-3-(butylthio) indolin-2-one (6c)

$^1\text{H}$  NMR (500 MHz,  $\text{CDCl}_3$ )

7.50, 7.39, 7.37, 7.26, 6.80, 6.78, 4.29, 2.73, 2.72, 2.70, 2.70, 2.69, 2.67, 2.66, 2.52, 2.51, 2.50, 2.49, 2.47, 2.47, 1.57, 1.56, 1.52, 1.51, 1.50, 1.42, 1.41, 1.40, 1.39, 1.37, 1.35, 1.35, 0.89, 0.87, 0.85

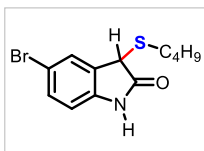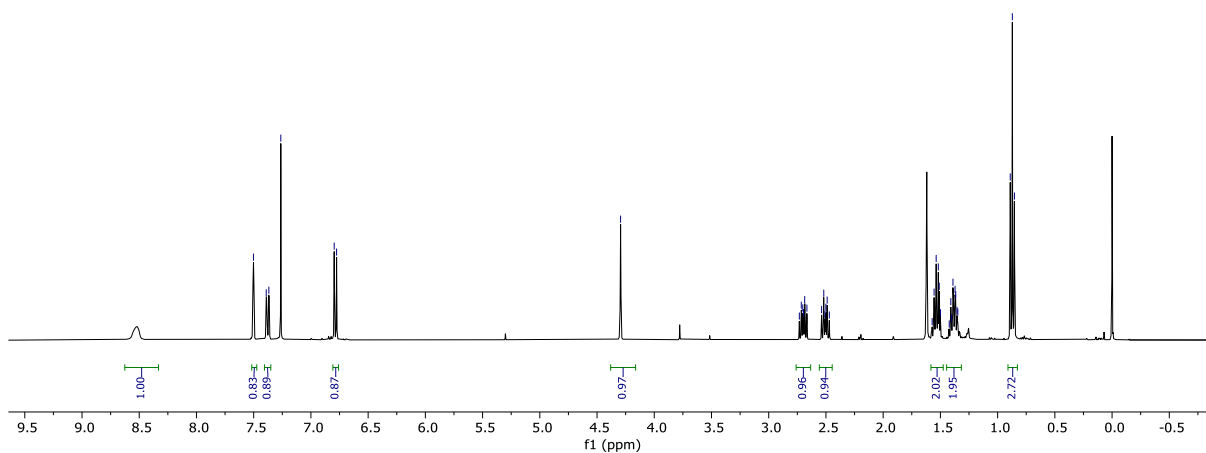

$^{13}\text{C}\{^1\text{H}\}$  NMR (126 MHz  $\text{CDCl}_3$ )

178.36, 140.45, 131.98, 128.45, 128.44, 115.64, 111.82, 77.42, 77.06, 76.91, 45.79, 31.05, 29.49, 21.97, 13.66

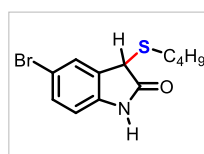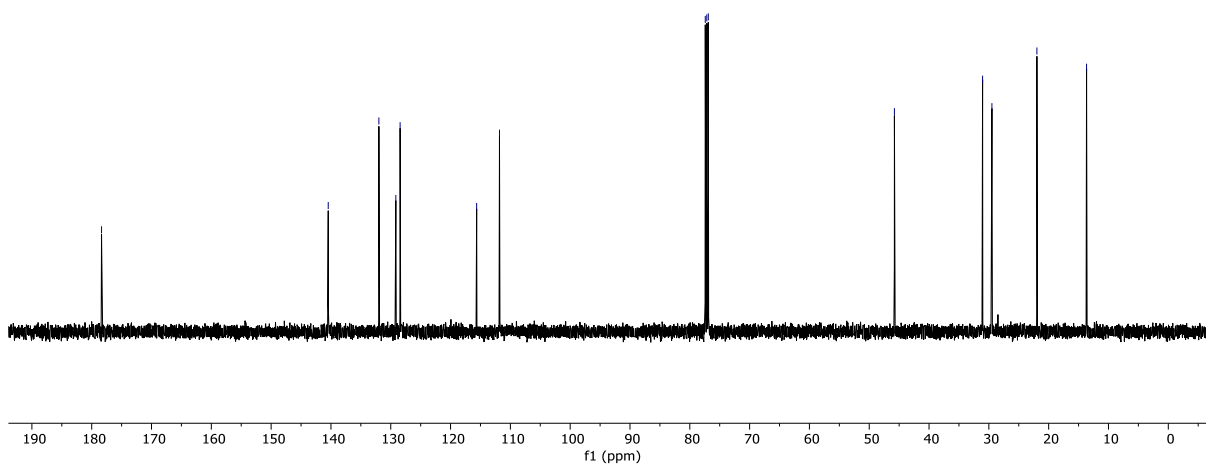

### 3-(Butylthio)-5-methylindolin-2-one (6d)

$^1\text{H}$  NMR (500 MHz,  $\text{CDCl}_3$ )

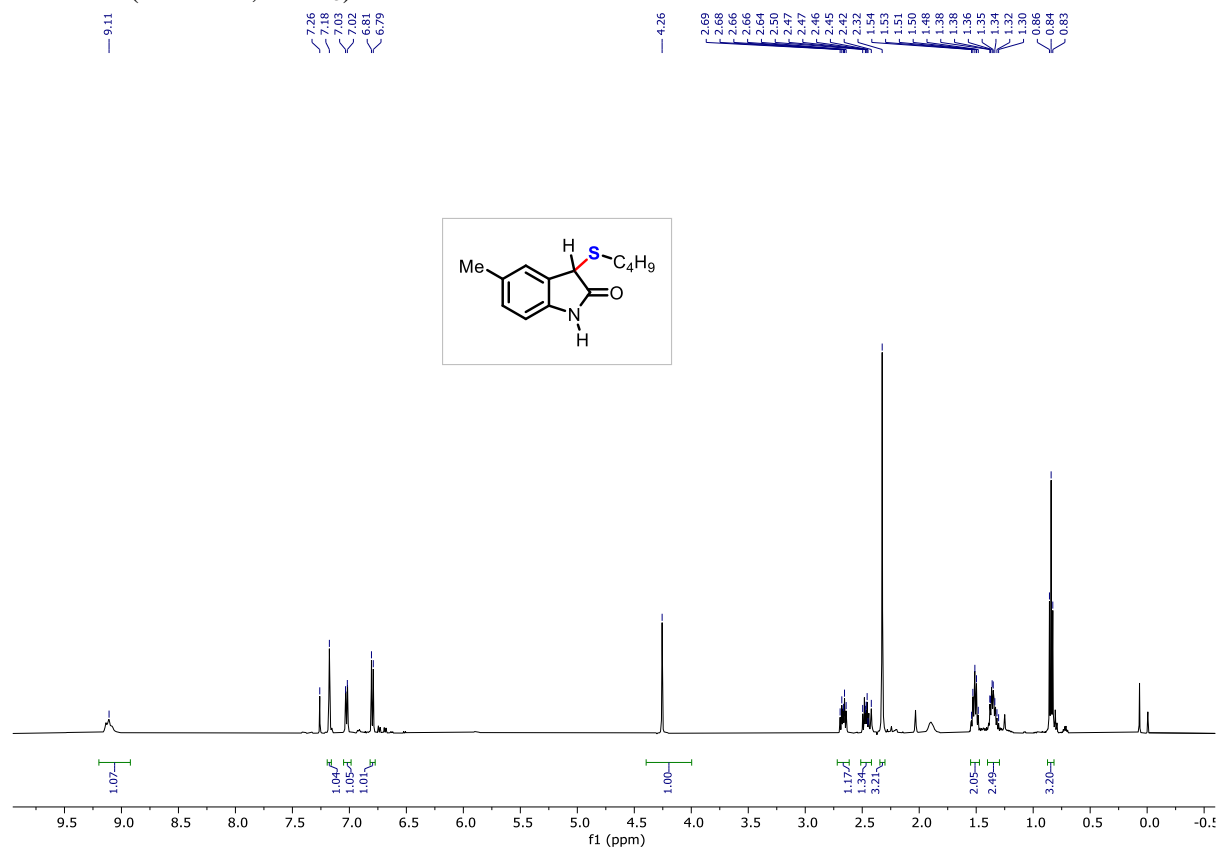

$^{13}\text{C}\{^1\text{H}\}$  NMR (126 MHz  $\text{CDCl}_3$ )

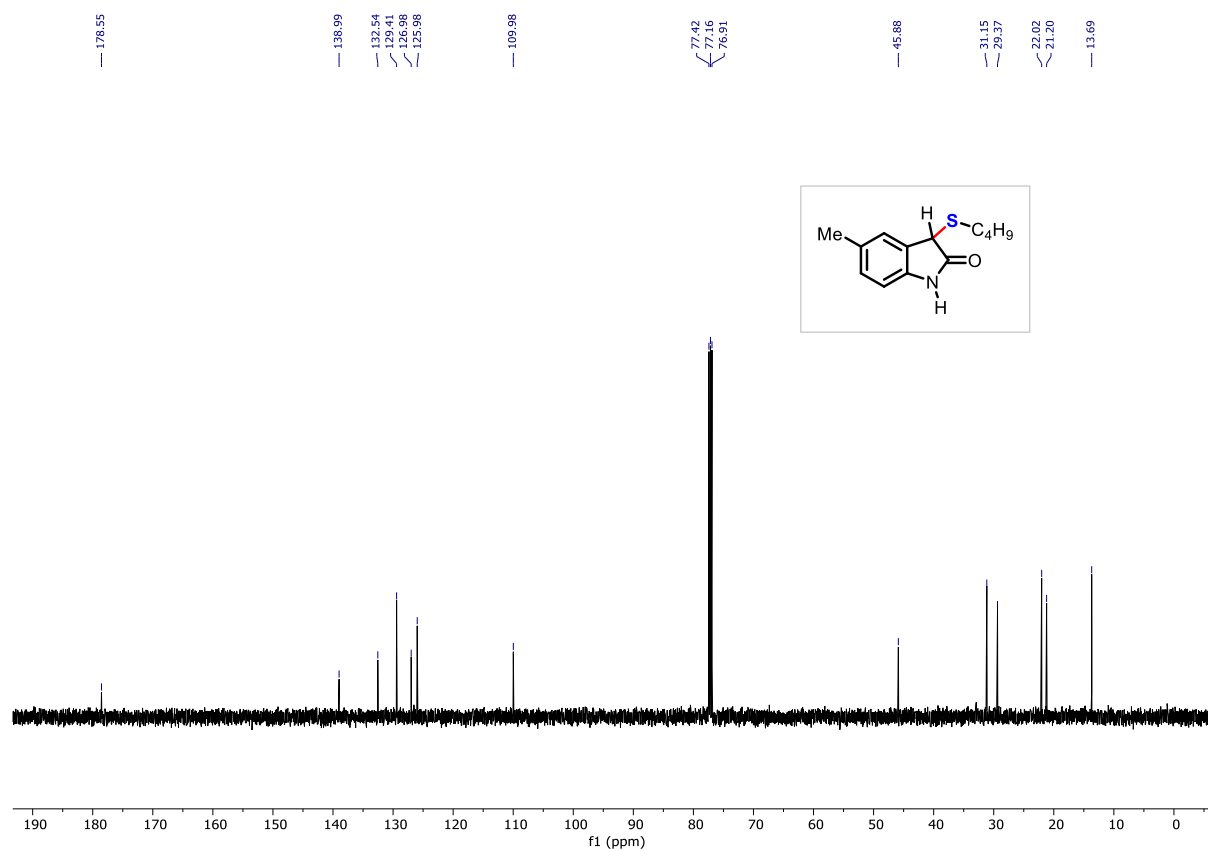

# 1-Benzyl-3-(butylthio) indolin-2-one (6e)

$^1\text{H}$  NMR (400 MHz,  $\text{CDCl}_3$ )

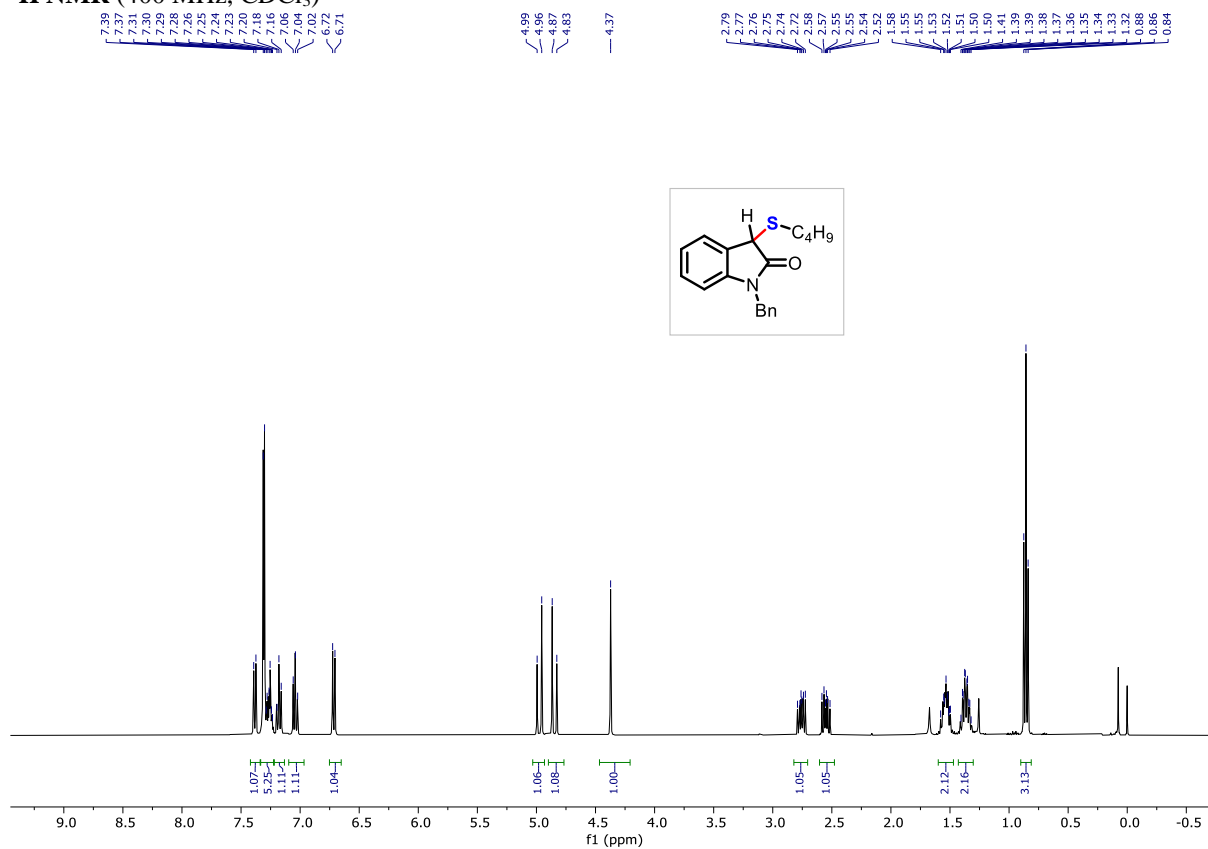

$^{13}\text{C}\{^1\text{H}\}$  NMR (126 MHz  $\text{CDCl}_3$ )

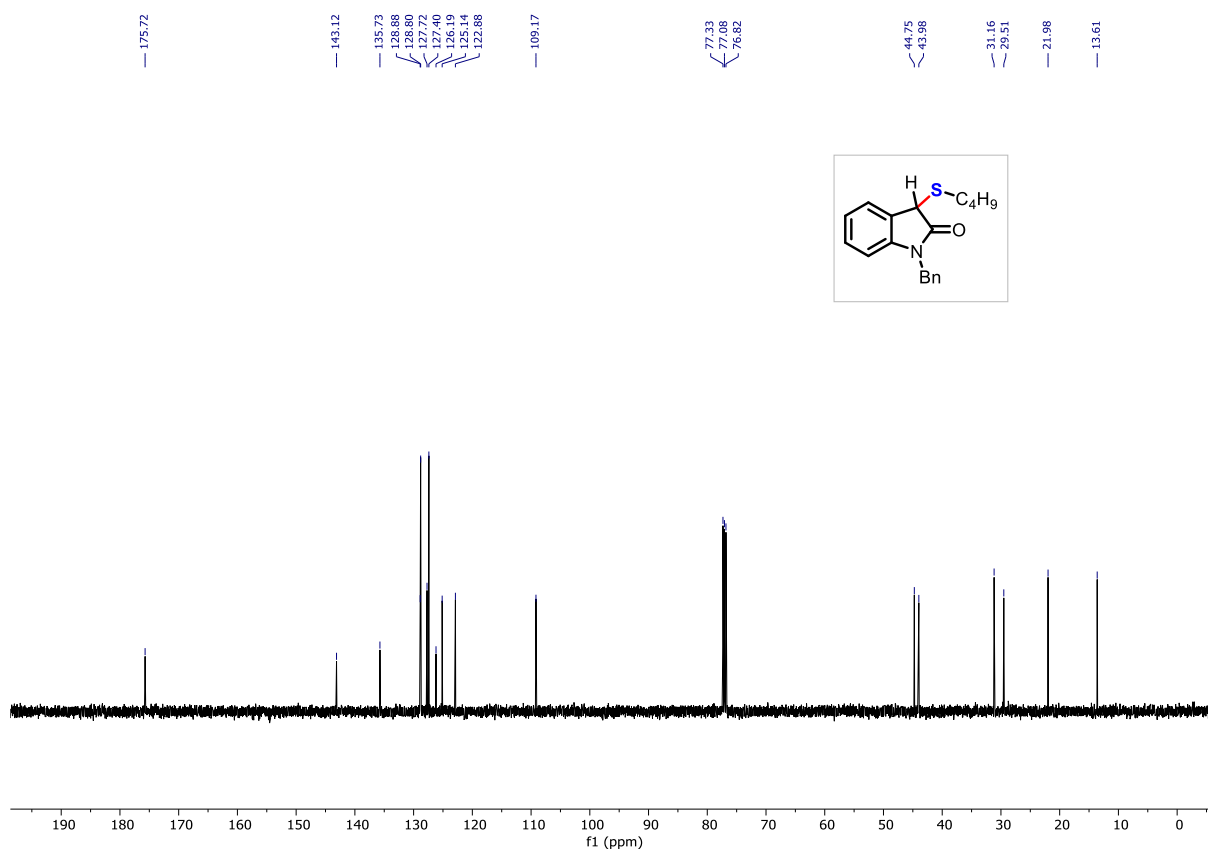

**Benzyl(butyl)sulfane (6f)**  
**<sup>1</sup>H NMR (500 MHz, CDCl<sub>3</sub>)**

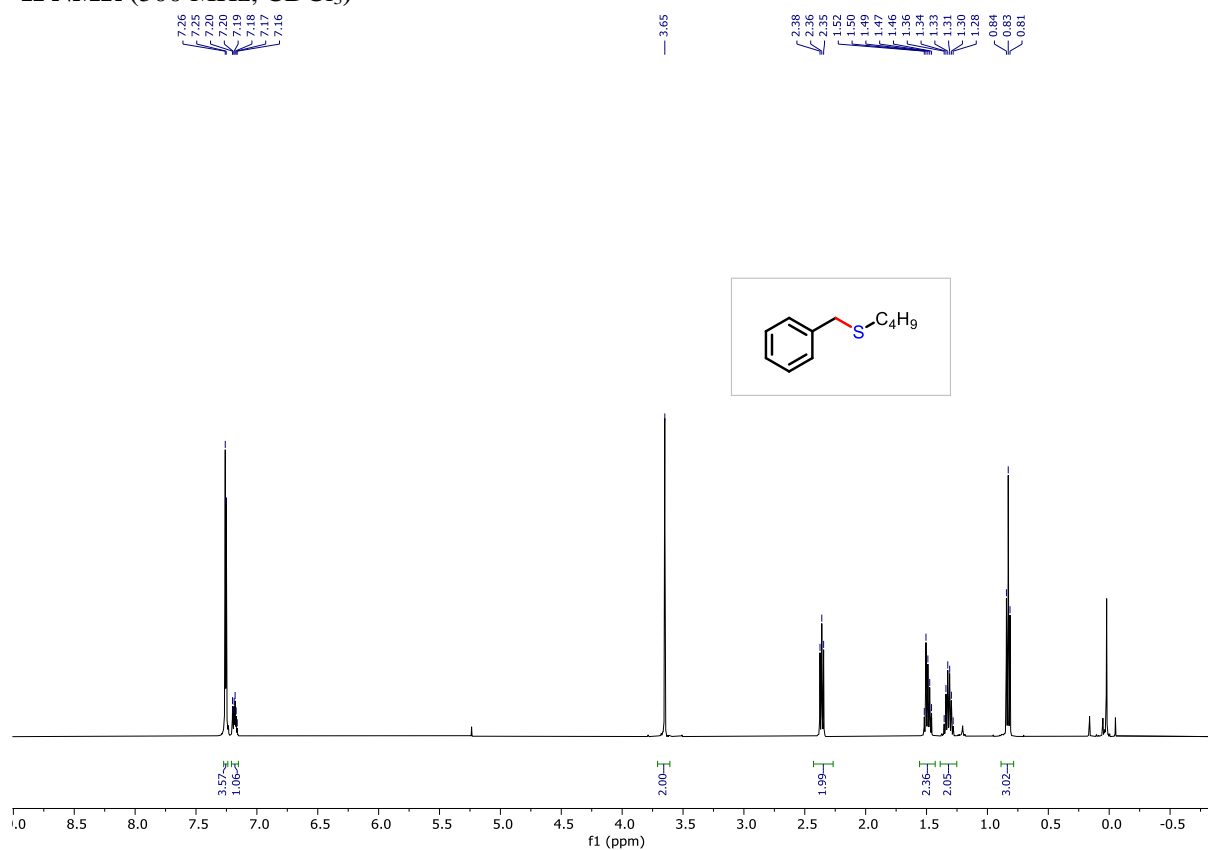

**<sup>13</sup>C{<sup>1</sup>H} NMR (126 MHz CDCl<sub>3</sub>)**

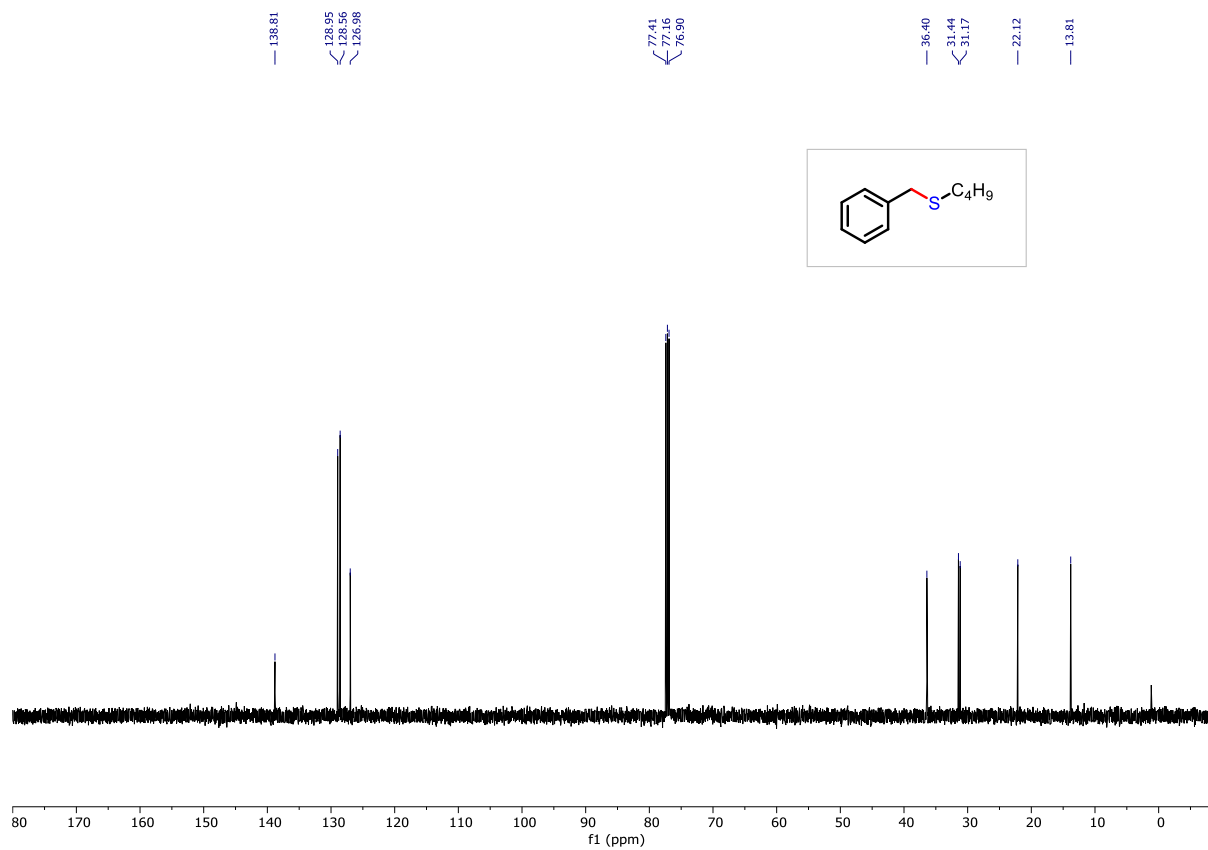

# Butyl(4-methoxybenzyl) sulfane (6g)

$^1\text{H}$  NMR (400 MHz,  $\text{CDCl}_3$ )

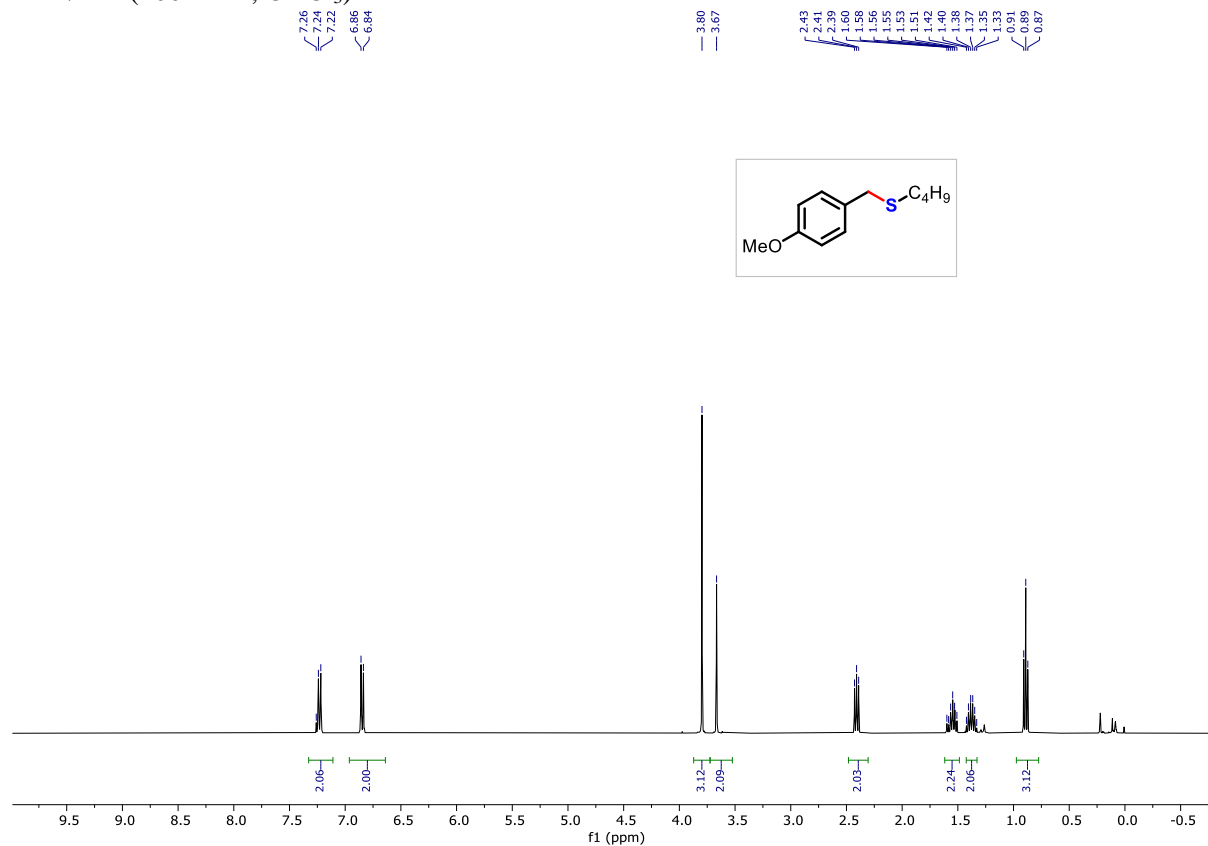

$^{13}\text{C}\{^1\text{H}\}$  NMR (126 MHz  $\text{CDCl}_3$ )

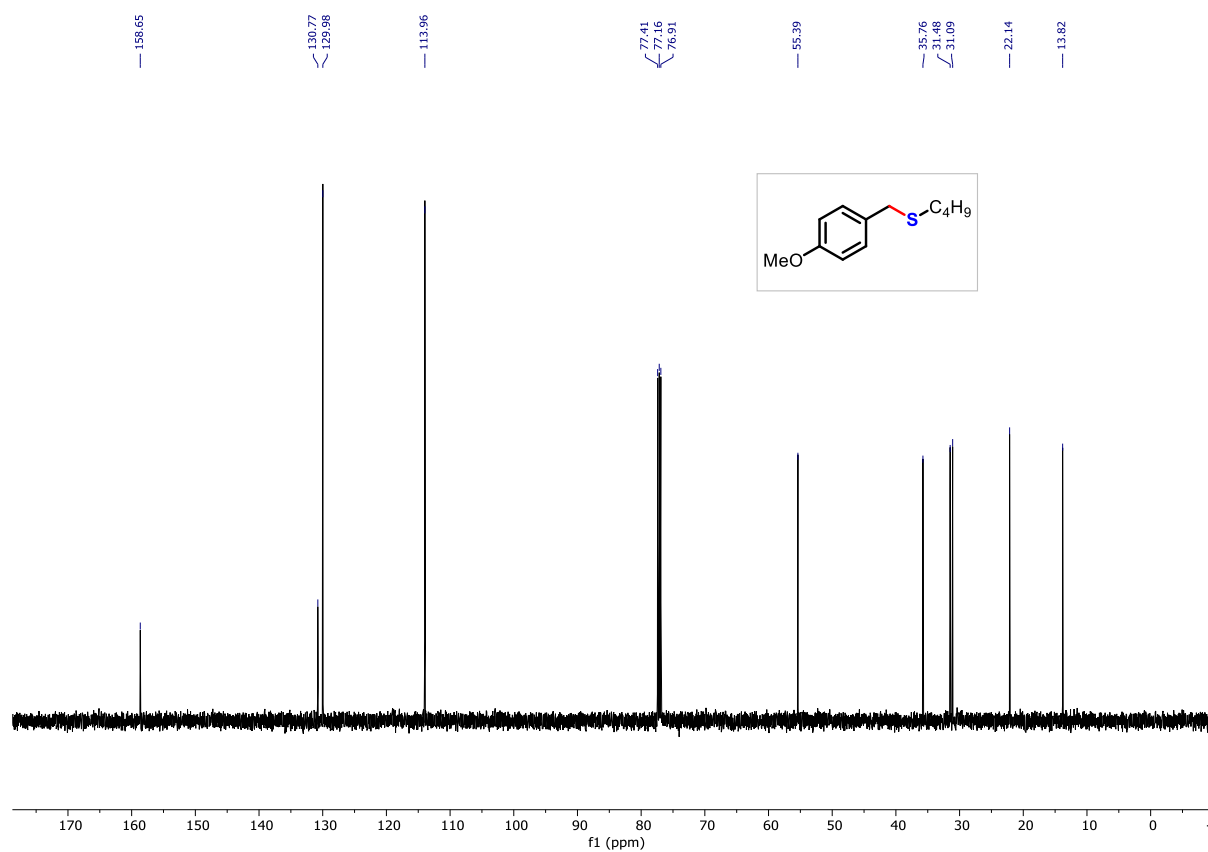

# 4-((Butylthio) methyl) benzonitrile (6h)

$^1\text{H}$  NMR (500 MHz,  $\text{CDCl}_3$ )

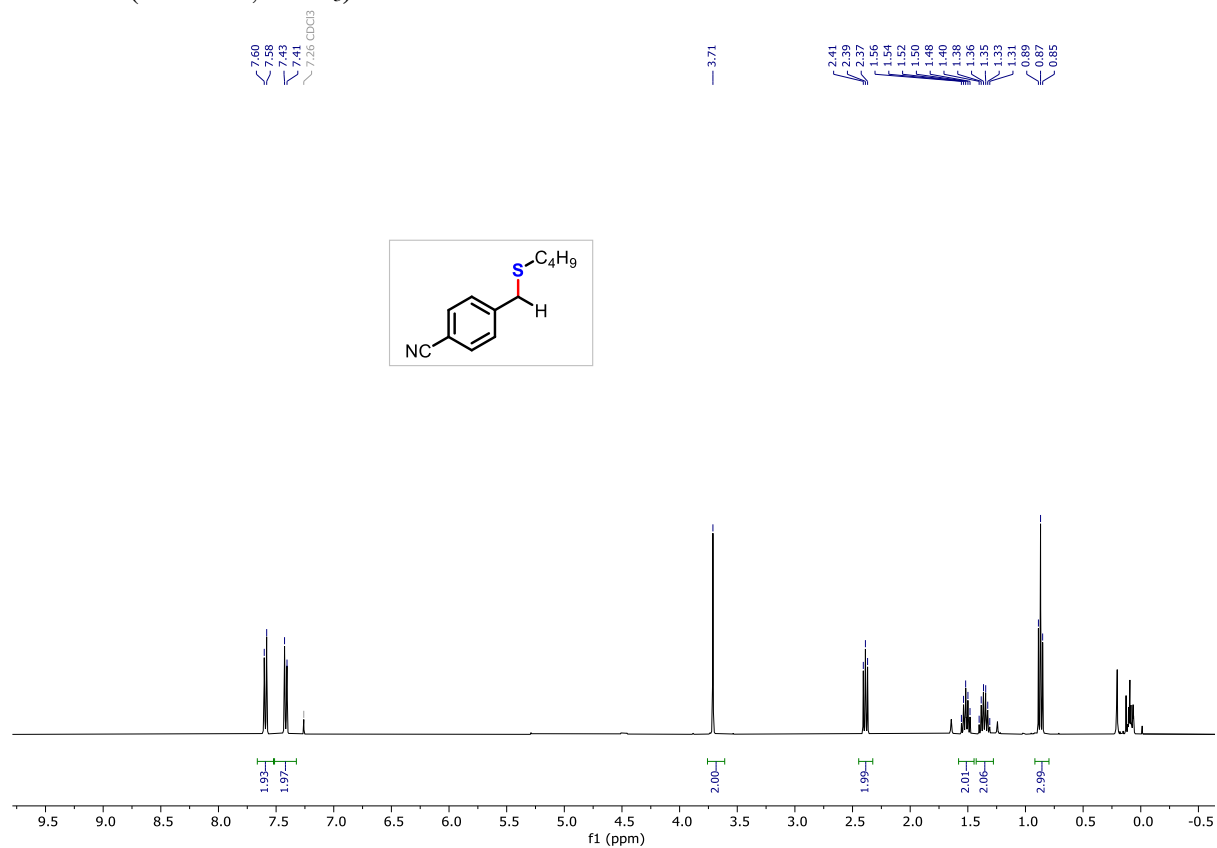

$^{13}\text{C}\{^1\text{H}\}$  NMR (126 MHz  $\text{CDCl}_3$ )

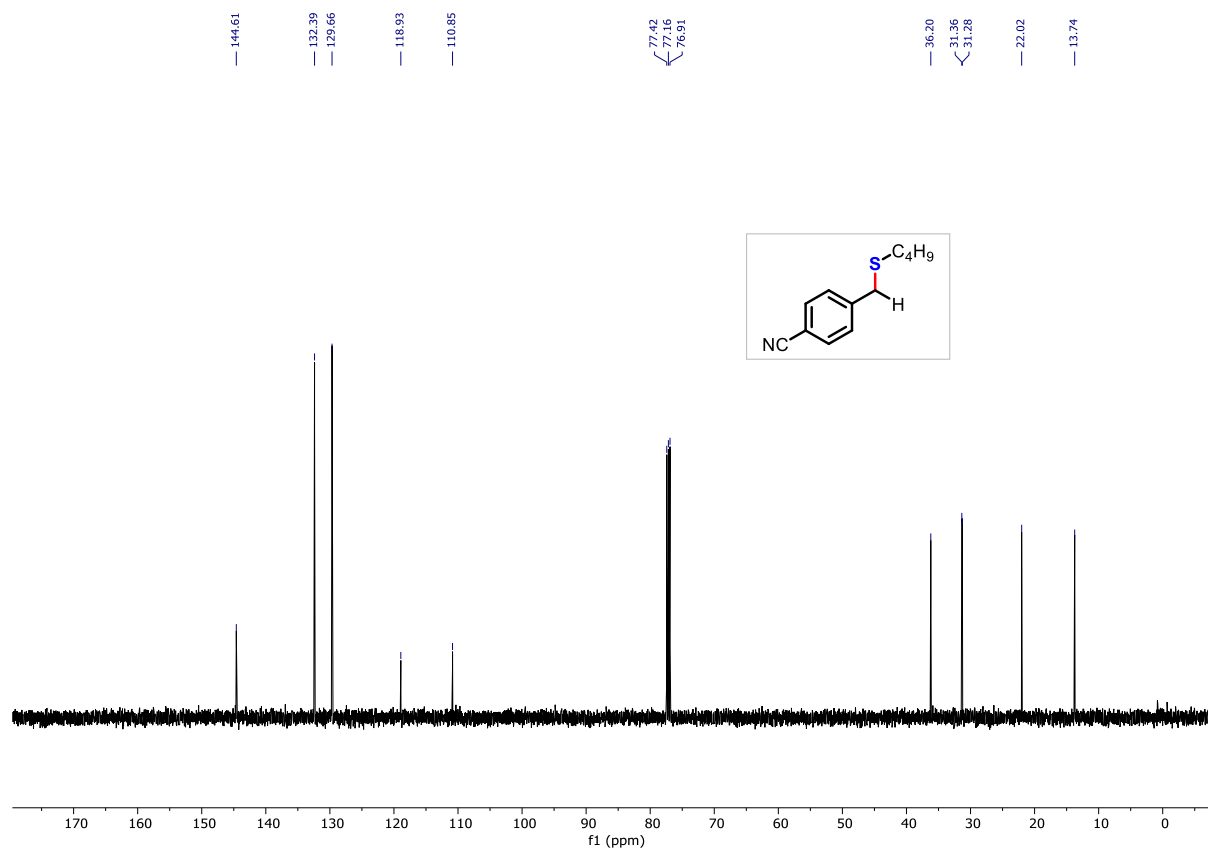

# Butyl(4-nitrobenzyl) sulfane (6i)

$^1\text{H}$  NMR (400 MHz,  $\text{CDCl}_3$ )

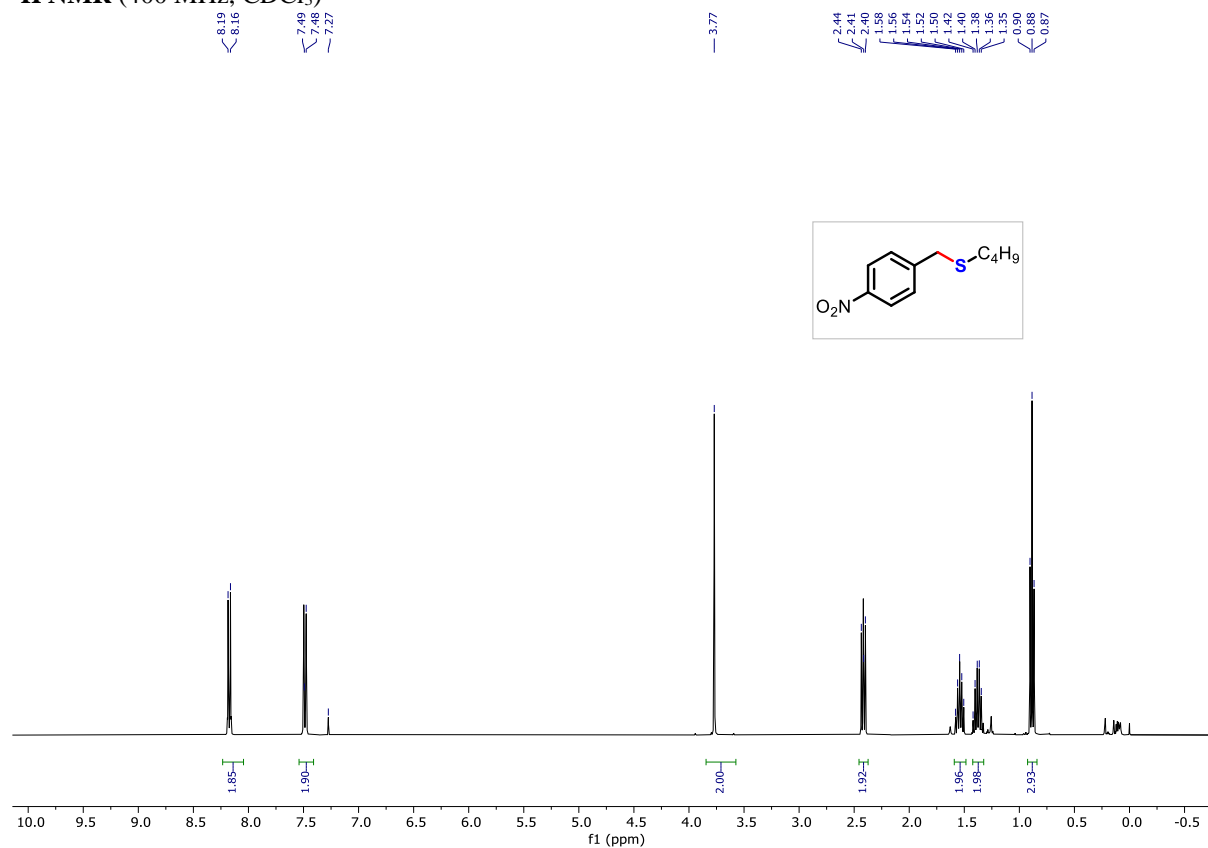

$^{13}\text{C}\{^1\text{H}\}$  NMR (126 MHz  $\text{CDCl}_3$ )

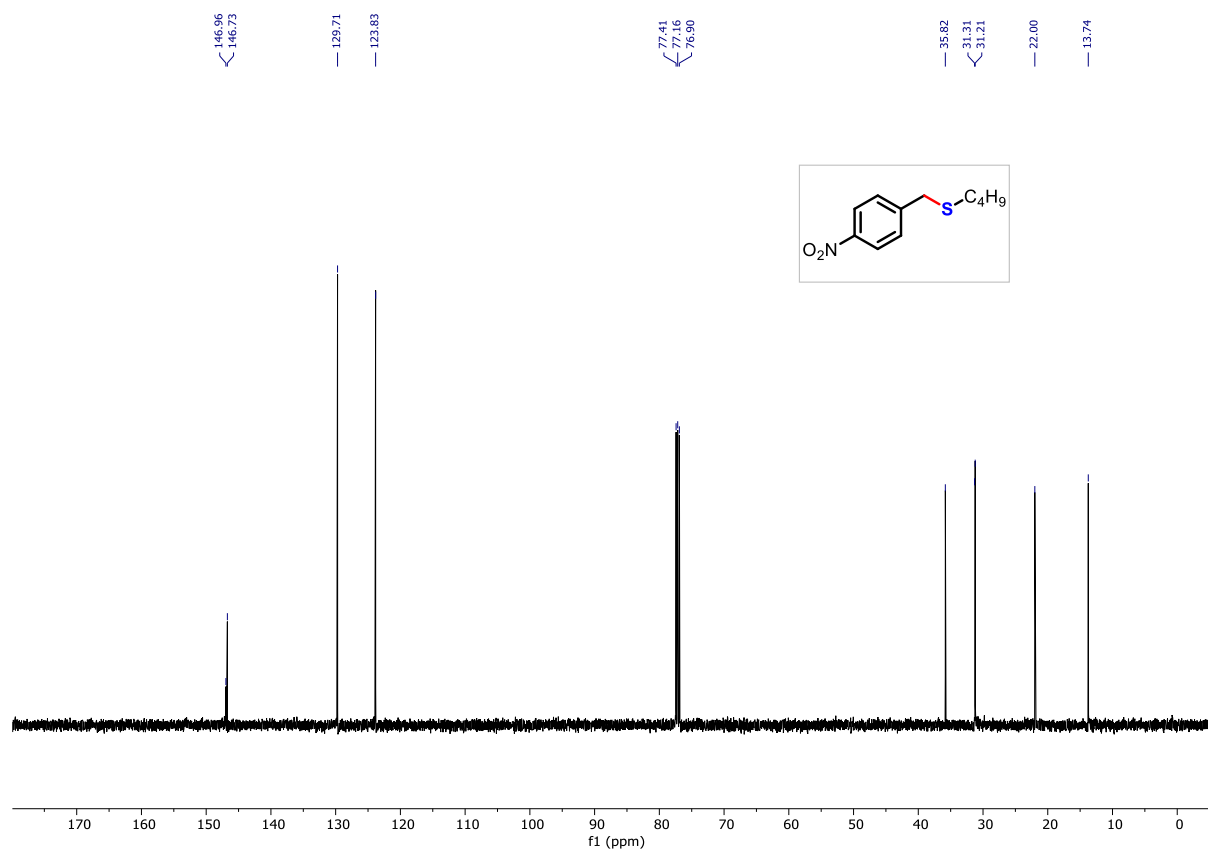

# Butyl(1-phenylethyl) sulfane (6j)

$^1\text{H}$  NMR (500 MHz,  $\text{CDCl}_3$ )

7.38  
7.37  
7.36  
7.35  
7.33  
7.29  
7.27  
7.26  
7.25

4.00  
3.99  
3.97  
3.96

2.40  
2.38  
2.37  
2.37  
2.36  
2.34  
2.32  
2.31  
2.29  
1.61  
1.59

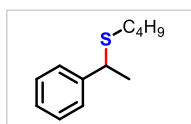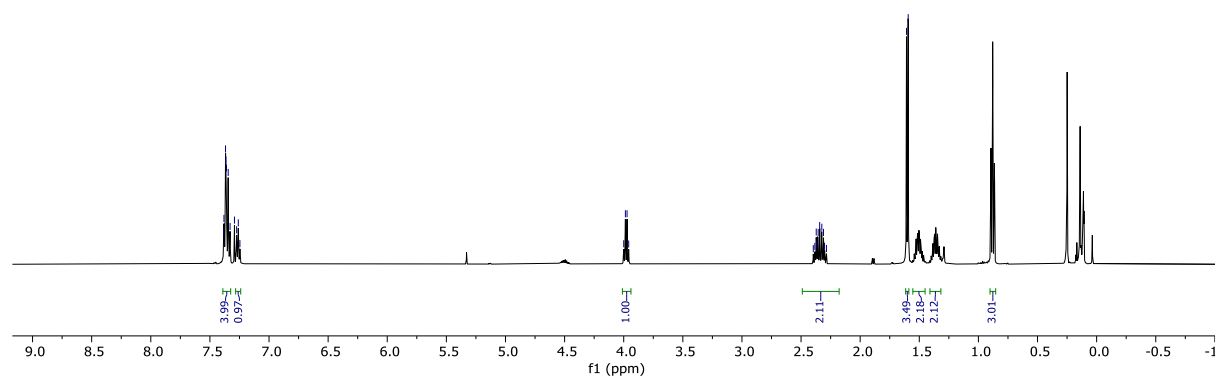

$^{13}\text{C}\{^1\text{H}\}$  NMR (126 MHz  $\text{CDCl}_3$ )

144.37

128.55  
127.37  
127.07

77.41  
77.16  
76.91

44.17

31.59  
31.10

22.75  
22.17

13.79

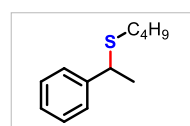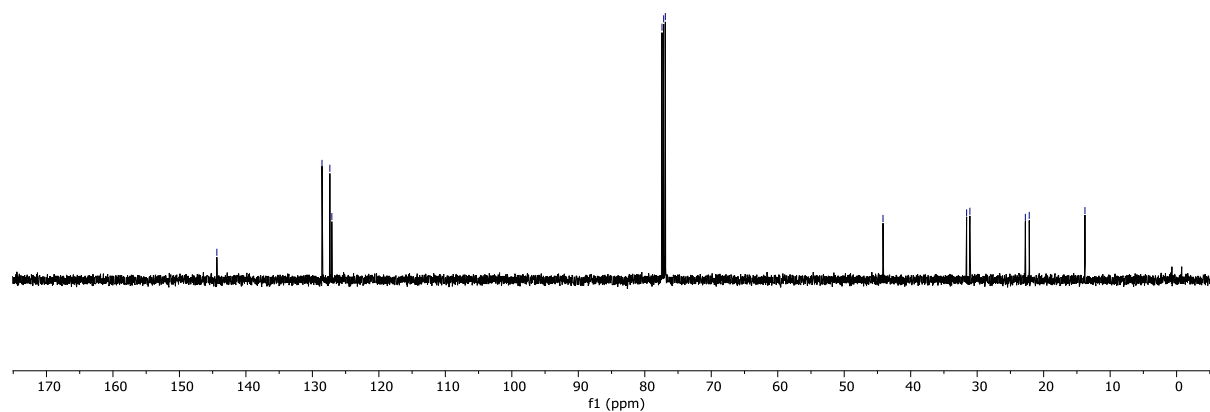



# (1-(4-Bromophenyl) ethyl) (butyl)sulfane (6k)

$^1\text{H}$  NMR (400 MHz,  $\text{CDCl}_3$ )

7.44  
7.42  
7.26  
7.23  
7.21

1.54  
1.52  
1.50  
1.49  
1.49  
1.47  
1.46  
1.45  
1.43  
1.37  
1.36  
1.35  
1.33  
1.32  
1.31  
1.30  
1.29  
1.28  
1.26

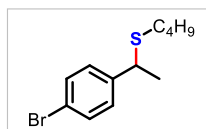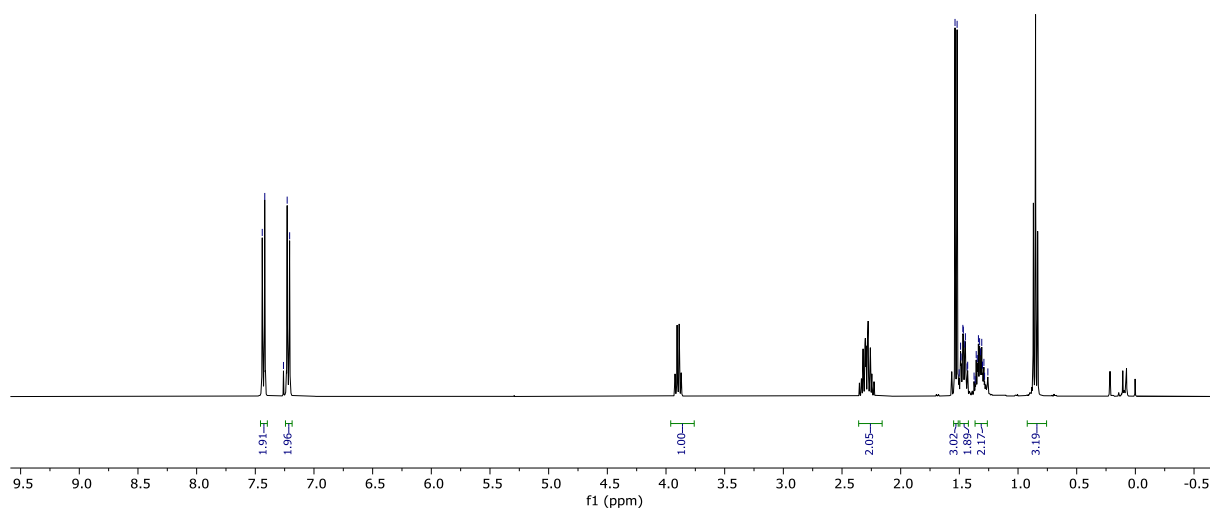

$^{13}\text{C}\{^1\text{H}\}$  NMR (126 MHz  $\text{CDCl}_3$ )

143.50  
131.63  
129.10  
120.66

77.41  
77.16  
76.91

43.56  
31.48  
31.07  
22.69  
22.13  
13.78

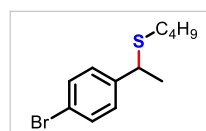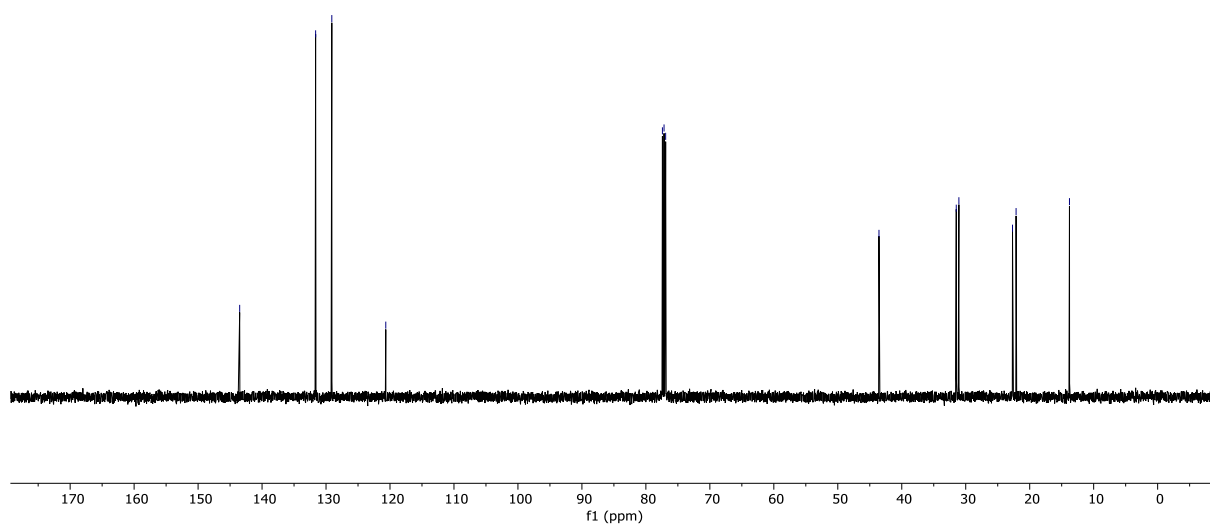

# Butyl(1-(4-nitrophenyl) ethyl) sulfane (6l)

$^1\text{H}$  NMR (400 MHz,  $\text{CDCl}_3$ )

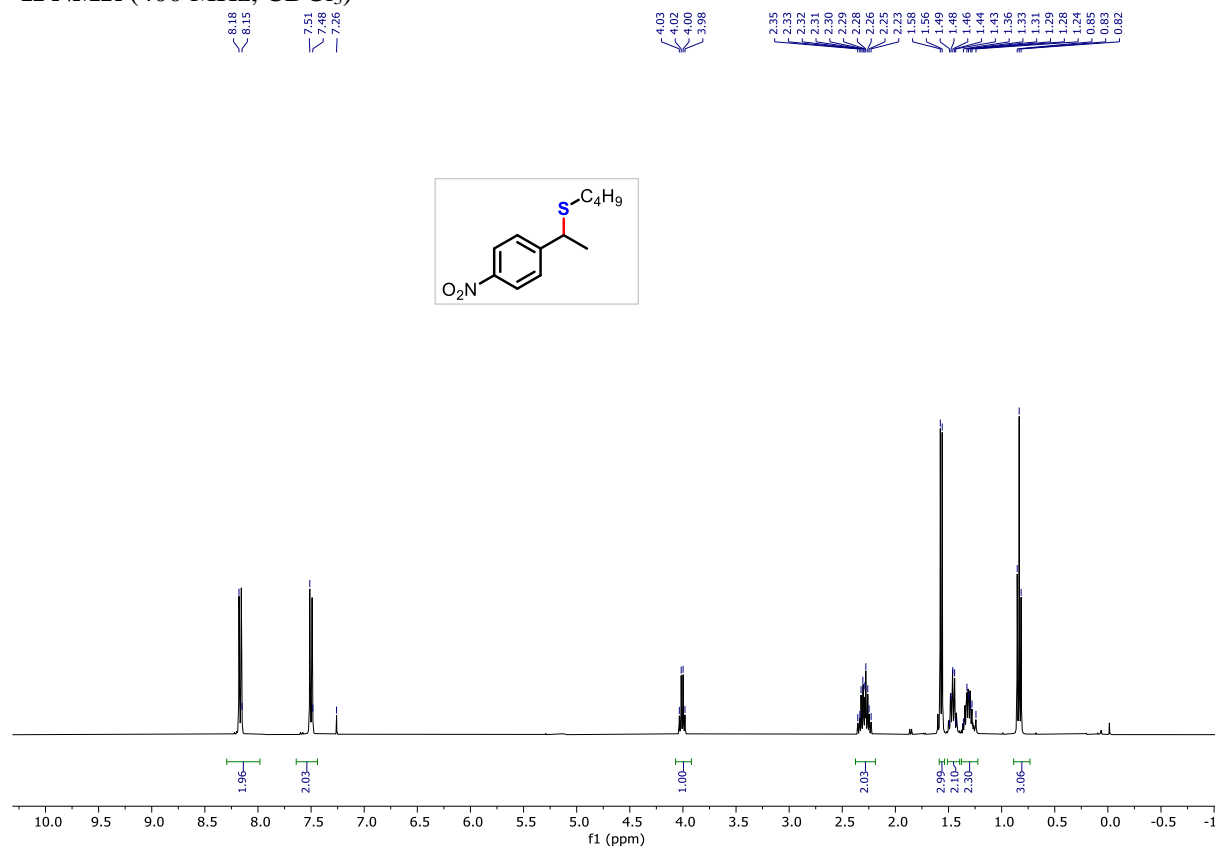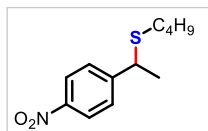

$^{13}\text{C}\{^1\text{H}\}$  NMR (126 MHz  $\text{CDCl}_3$ )

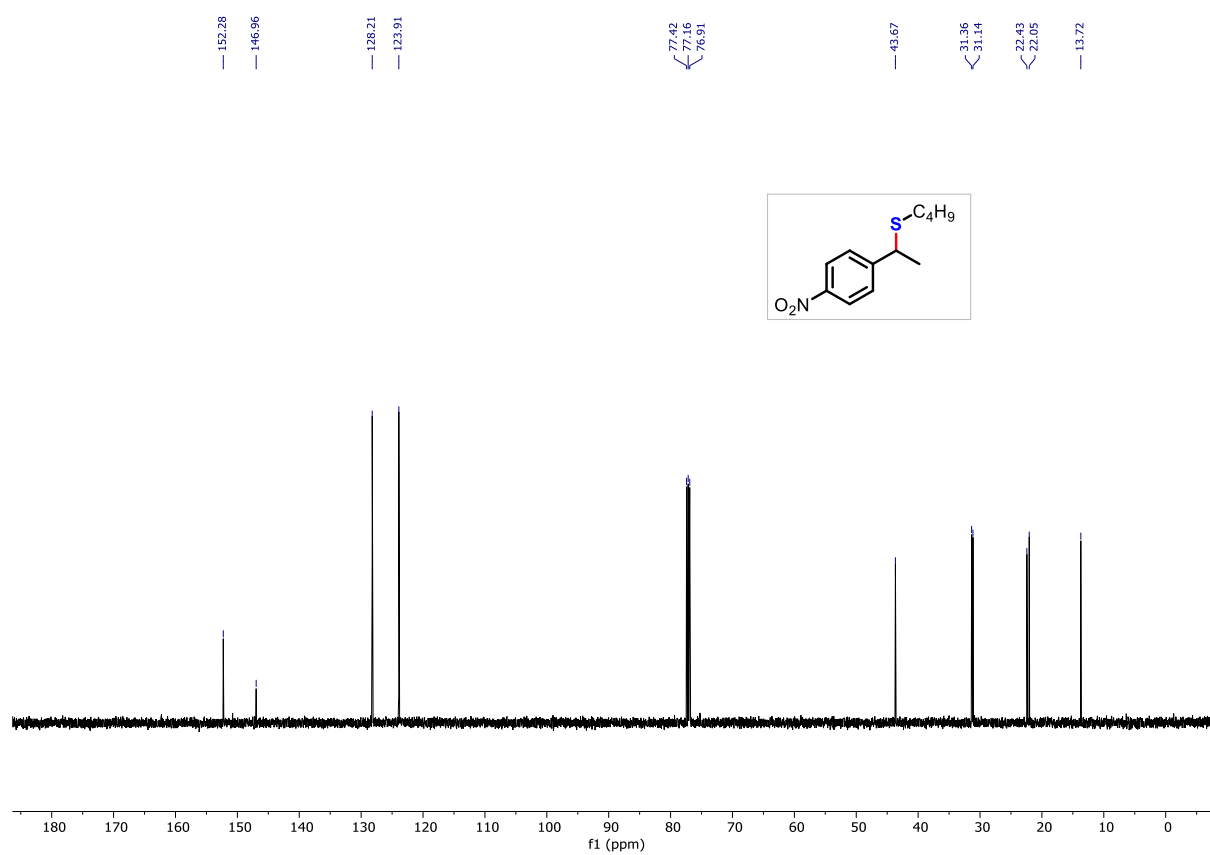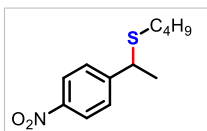

# Sec-butyl(*p*-tolyl) sulfane (6n)

$^1\text{H}$  NMR (500 MHz,  $\text{CDCl}_3$ )

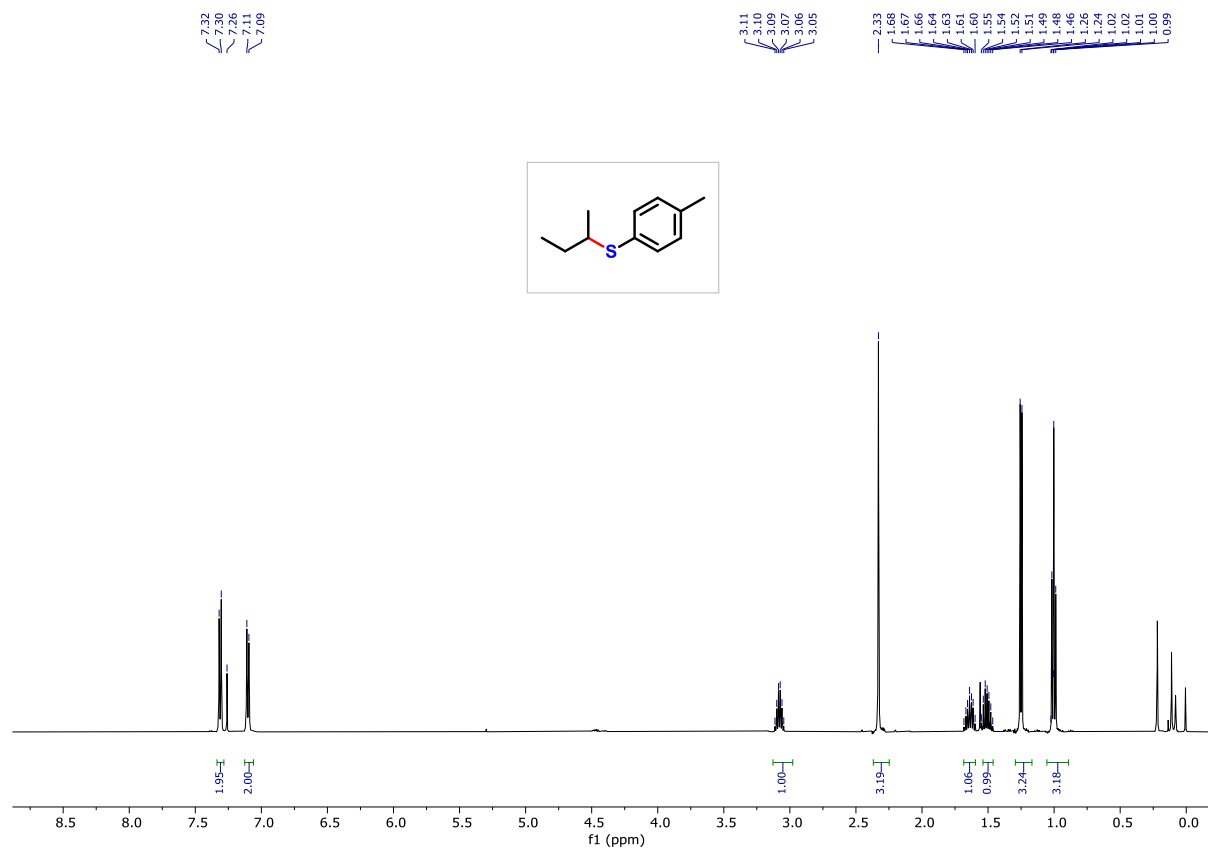

$^{13}\text{C}\{^1\text{H}\}$  NMR (126 MHz  $\text{CDCl}_3$ )

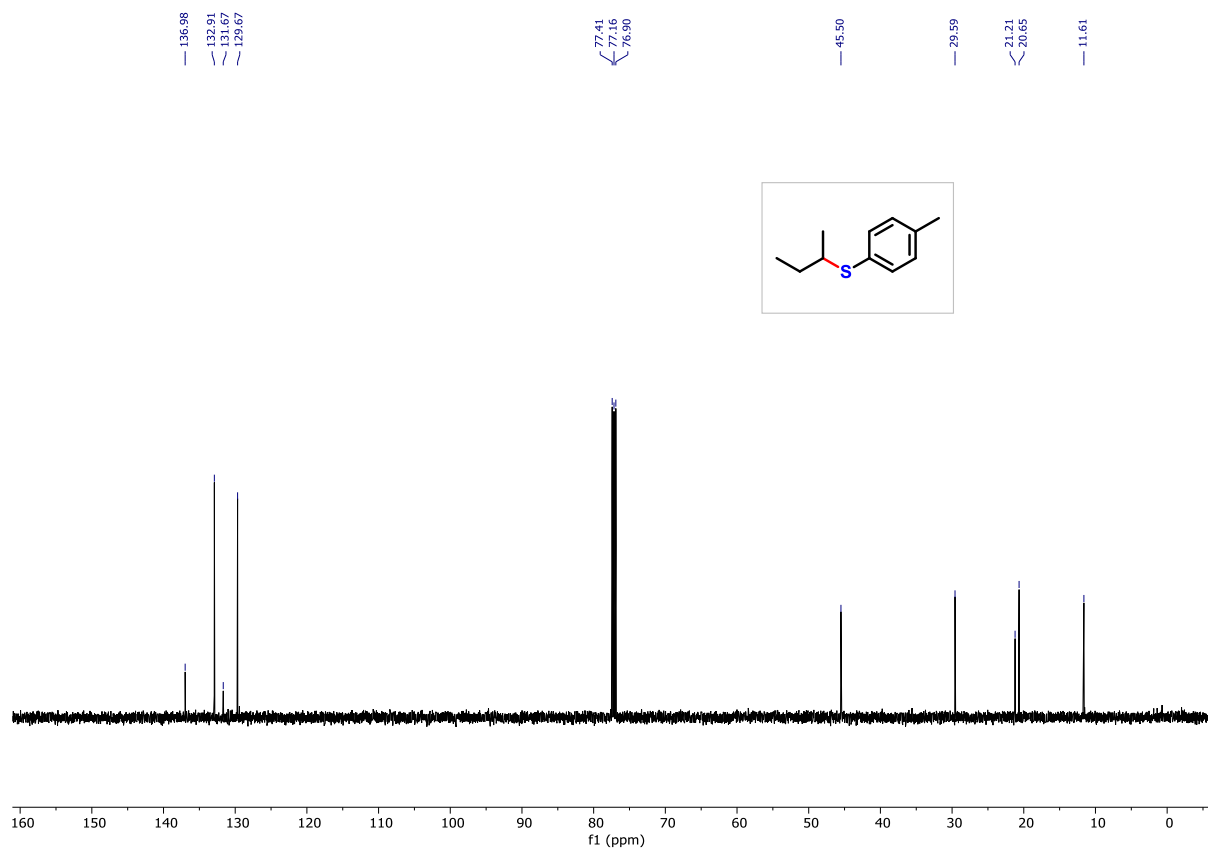

# Octan-2-yl(*p*-tolyl) sulfane (6o)

$^1\text{H}$  NMR (500 MHz,  $\text{CDCl}_3$ )

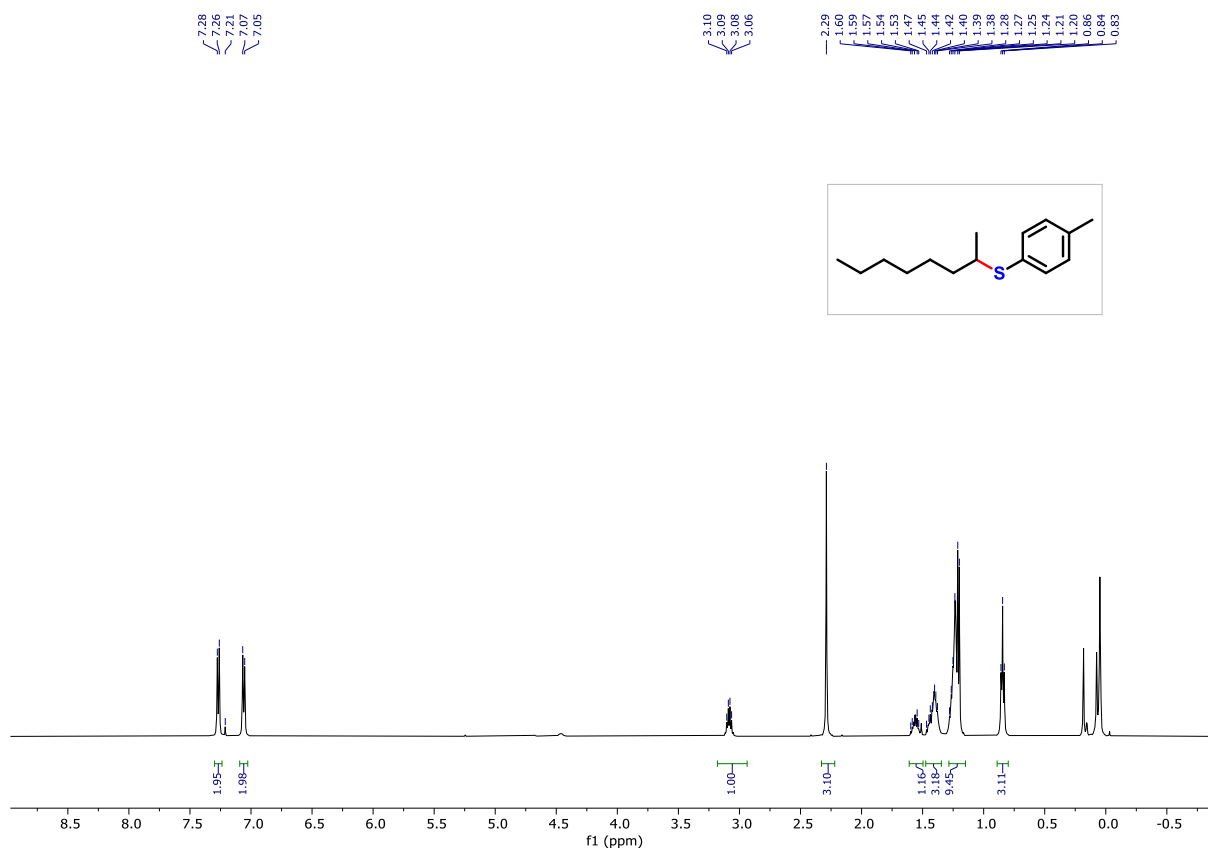

$^{13}\text{C}\{^1\text{H}\}$  NMR (126 MHz  $\text{CDCl}_3$ )

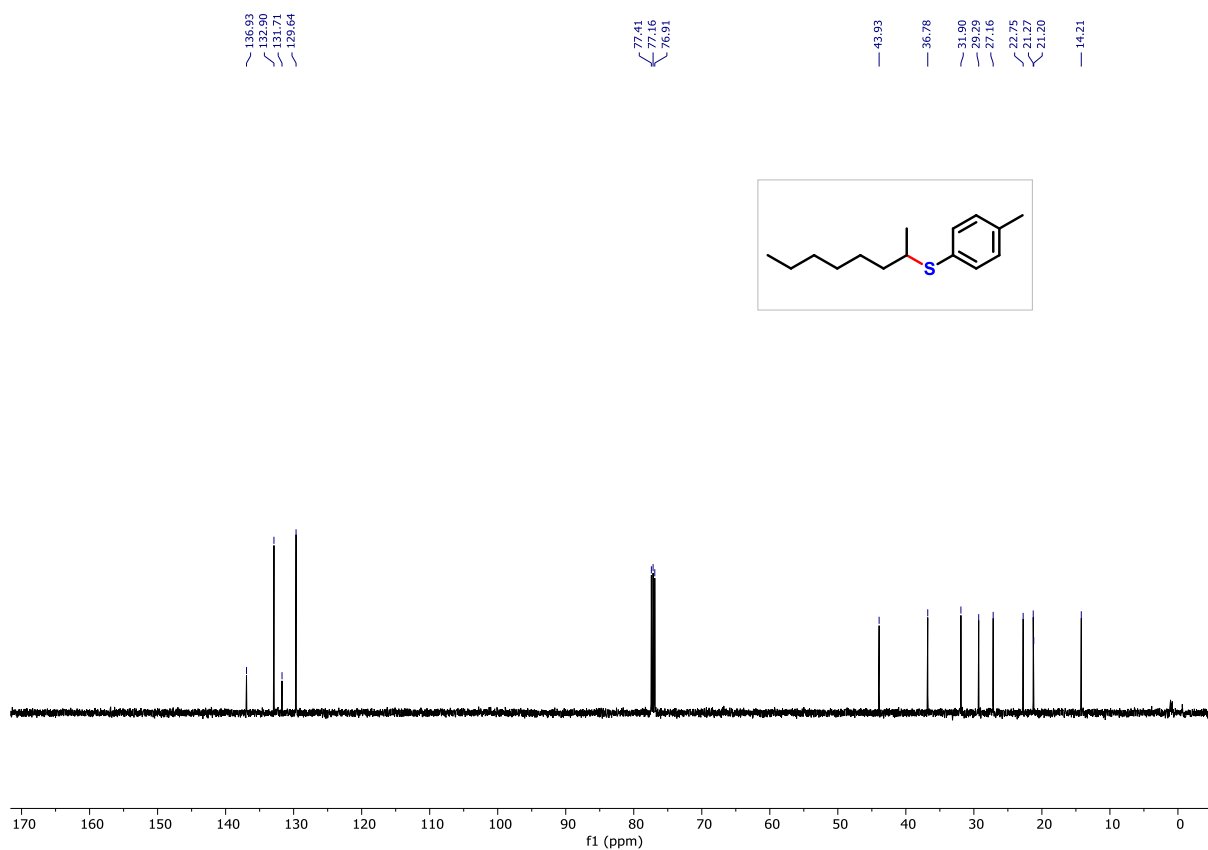

# Cyclohexyl(*p*-tolyl) sulfane (**6p**)

$^1\text{H}$  NMR (400 MHz,  $\text{CDCl}_3$ )

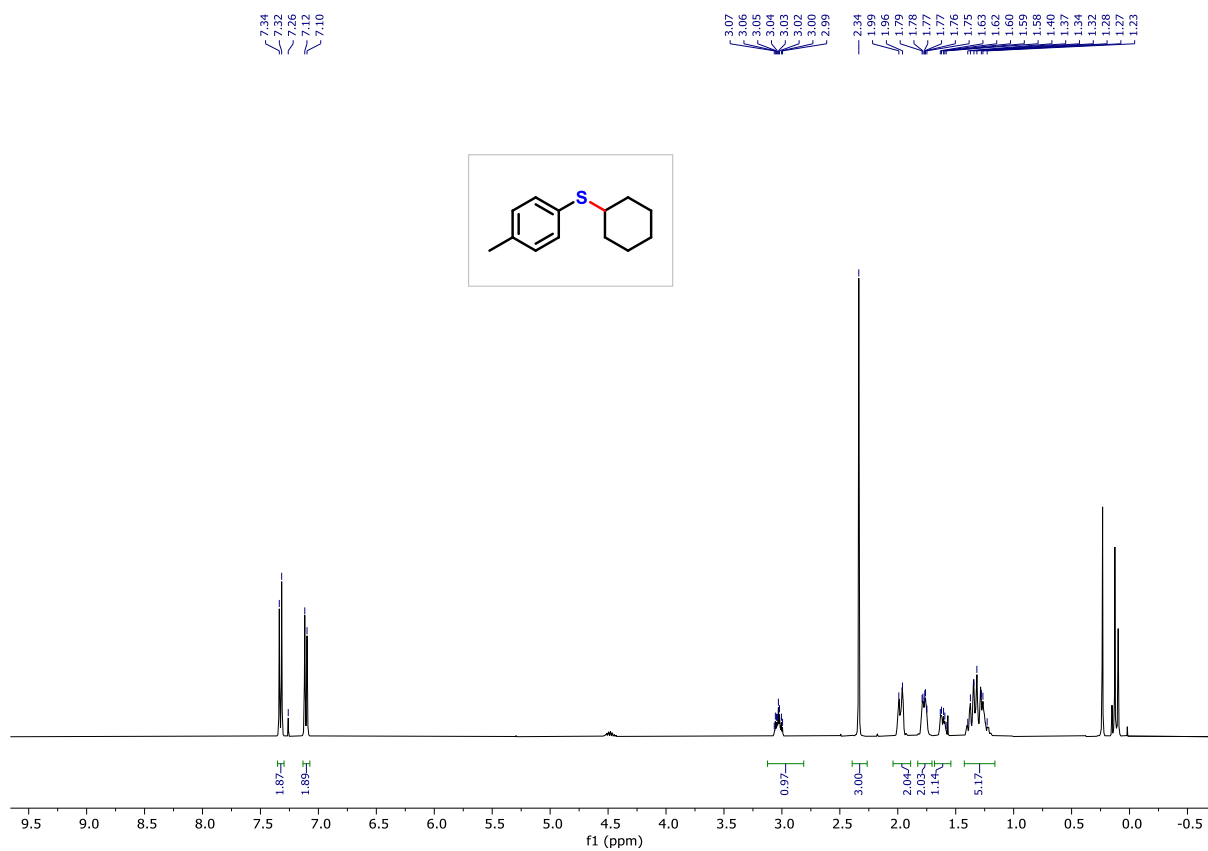

$^{13}\text{C}\{^1\text{H}\}$  NMR (126 MHz  $\text{CDCl}_3$ )

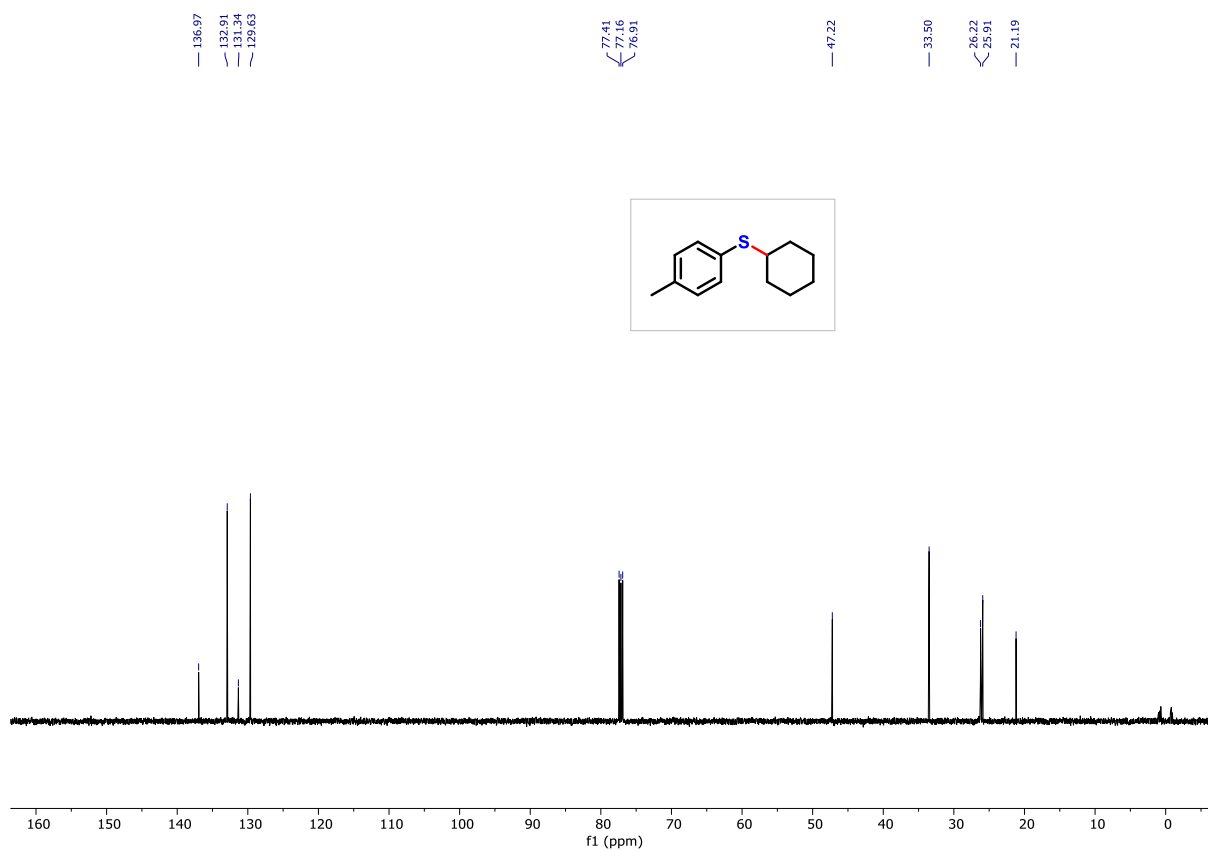

# Methyl 4-(1-(butylthio) ethyl) benzoate (6q)

$^1\text{H}$  NMR (500 MHz,  $\text{CDCl}_3$ )

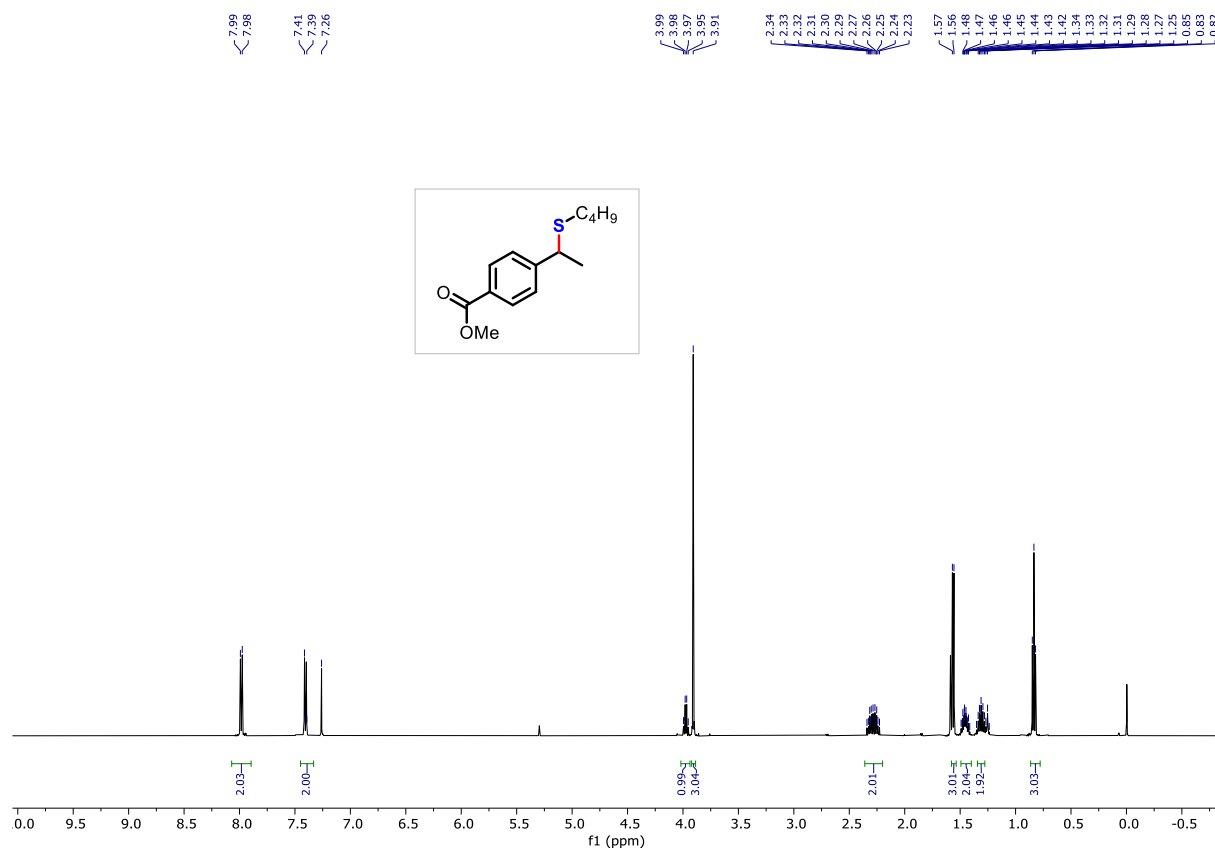

$^{13}\text{C}\{^1\text{H}\}$  NMR (126 MHz  $\text{CDCl}_3$ )

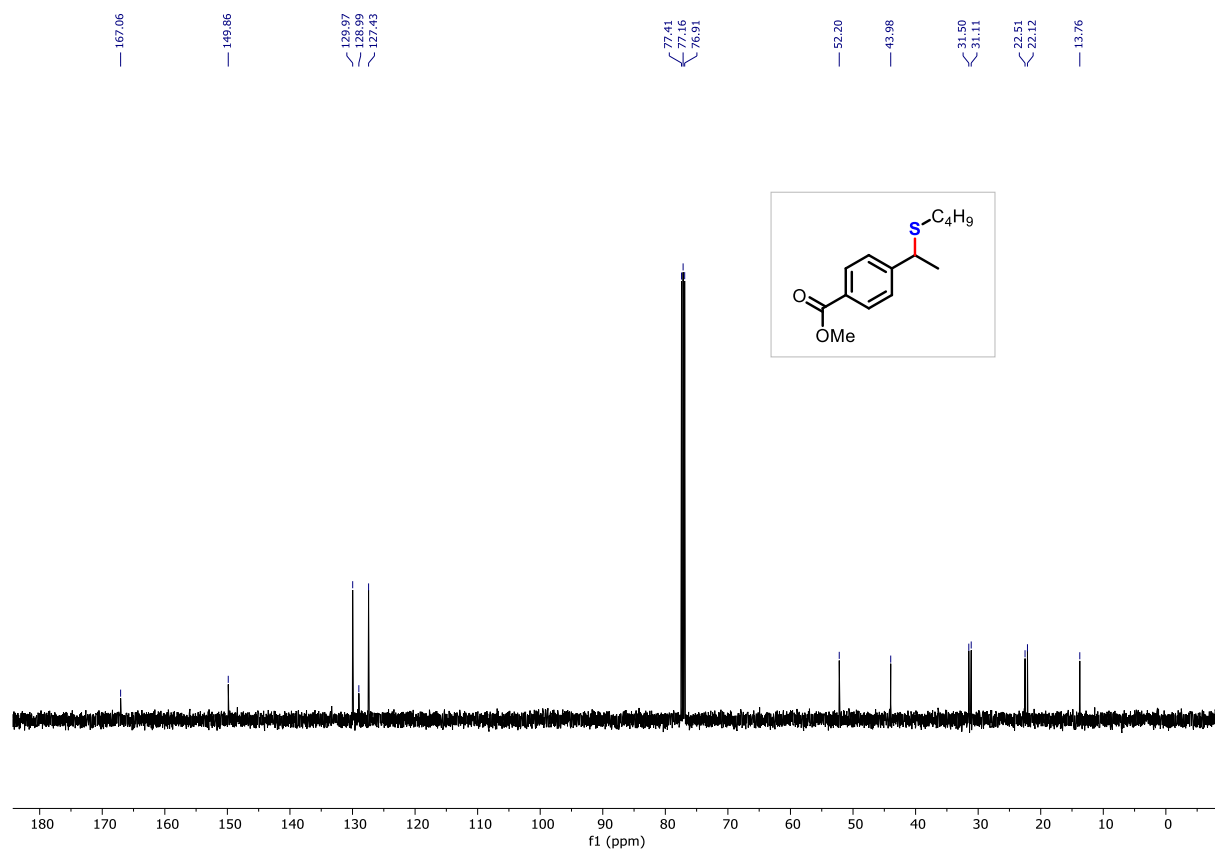

## 2-(Butylthio)-2-phenylacetic acid (6r)

$^1\text{H}$  NMR (400 MHz,  $\text{CDCl}_3$ )

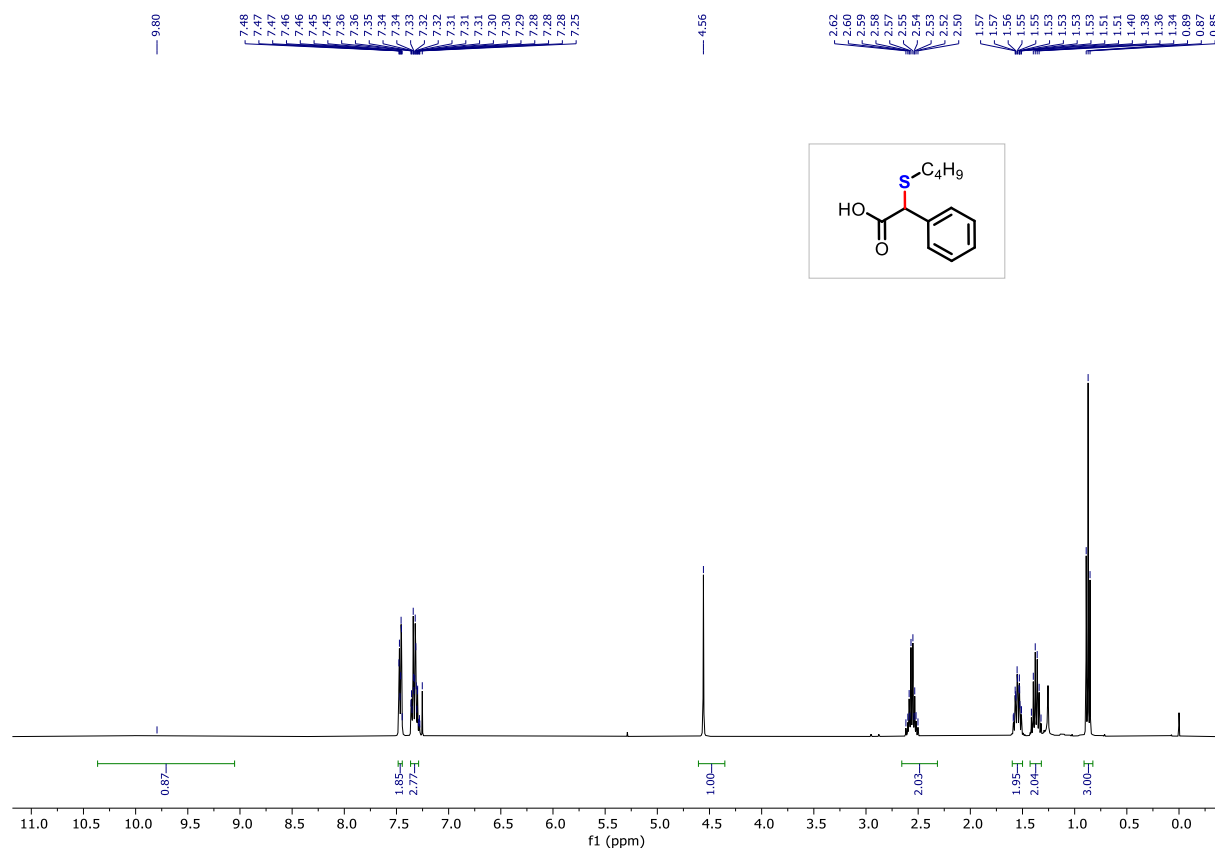

$^{13}\text{C}\{^1\text{H}\}$  NMR (126 MHz  $\text{CDCl}_3$ )

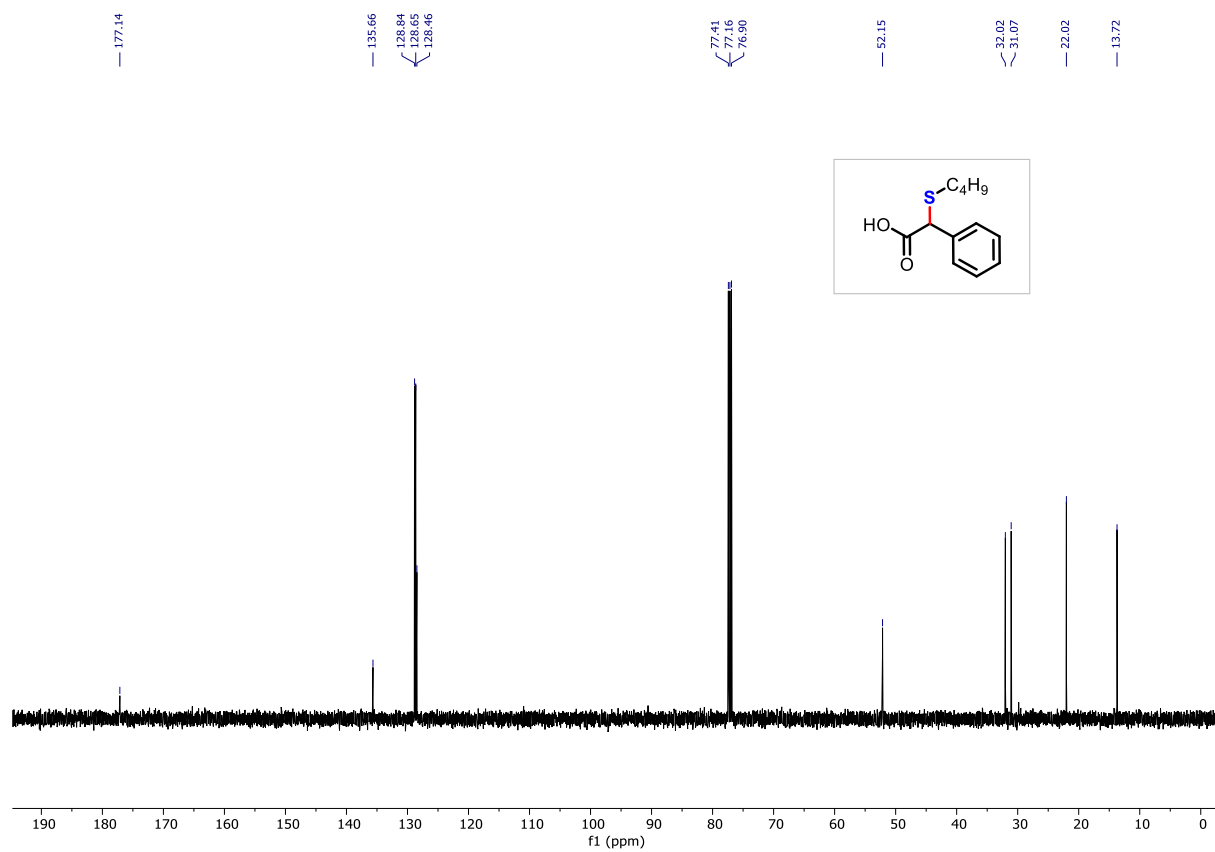

## 2-(Butylthio)-*N*-(4-cyanophenyl)-2-phenylacetamide (6s)

$^1\text{H}$  NMR (500 MHz,  $\text{CDCl}_3$ )

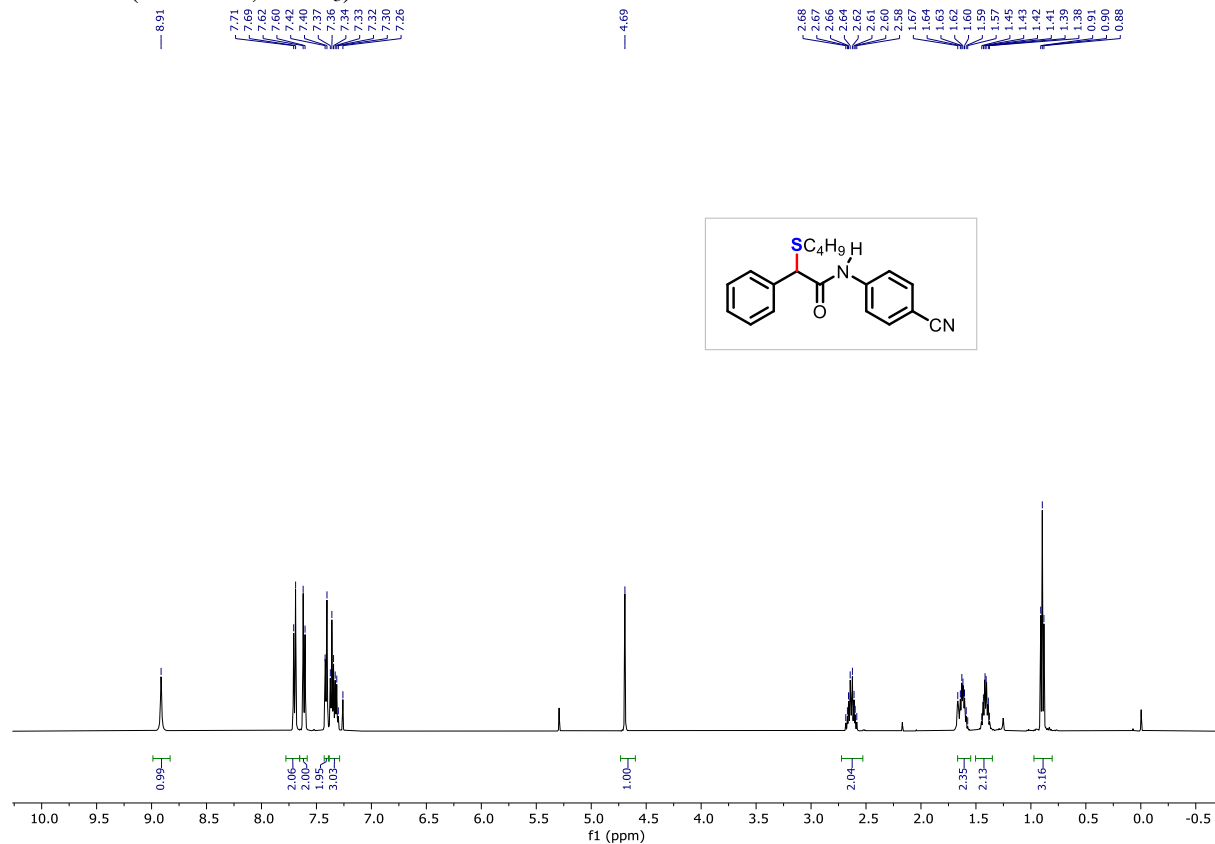

$^{13}\text{C}\{^1\text{H}\}$  NMR (126 MHz  $\text{CDCl}_3$ )

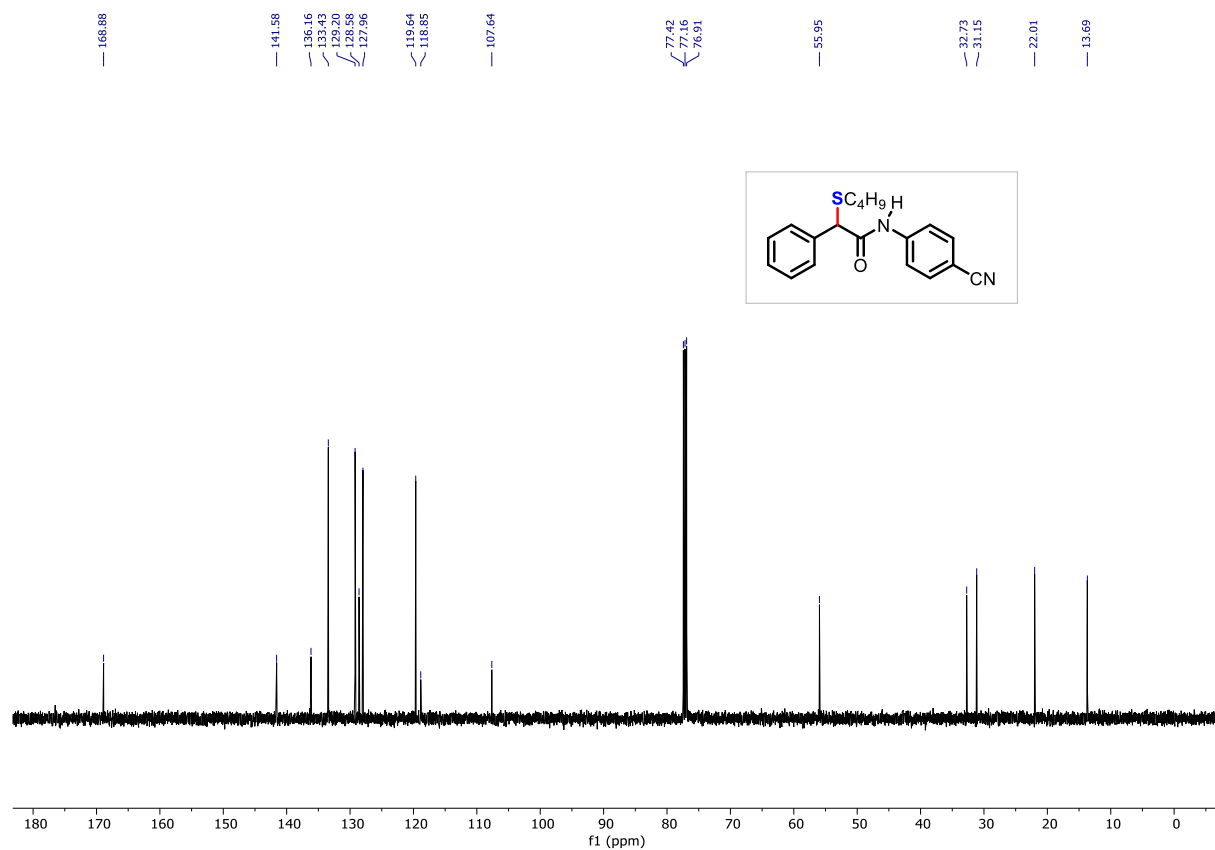



# 5-(1-(*p*-Tolylthio)-2-tosylethyl)-2,3-dihydrobenzo[*b*][1,4] dioxine (6t)

$^1\text{H}$  NMR (500 MHz  $\text{CDCl}_3$ )

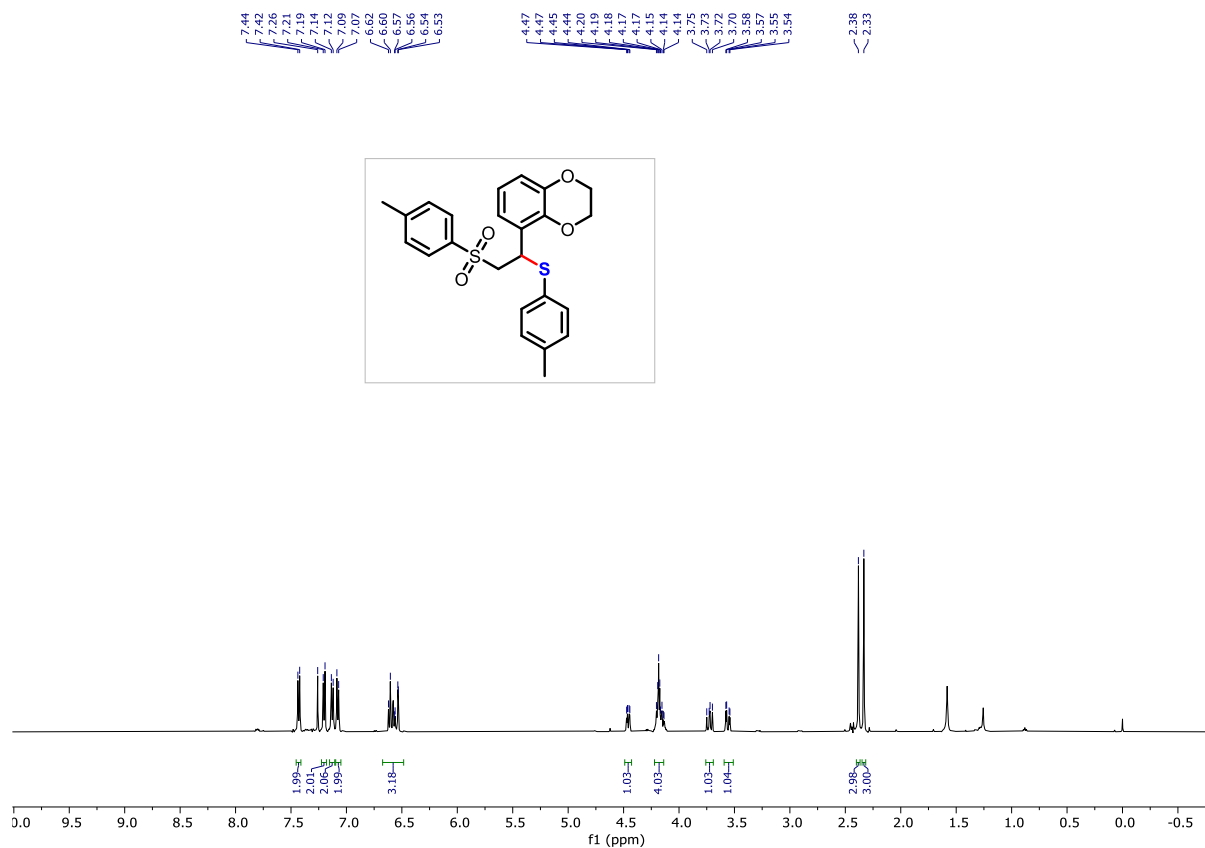

$^{13}\text{C}\{^1\text{H}\}$  NMR (126 MHz  $\text{CDCl}_3$ )

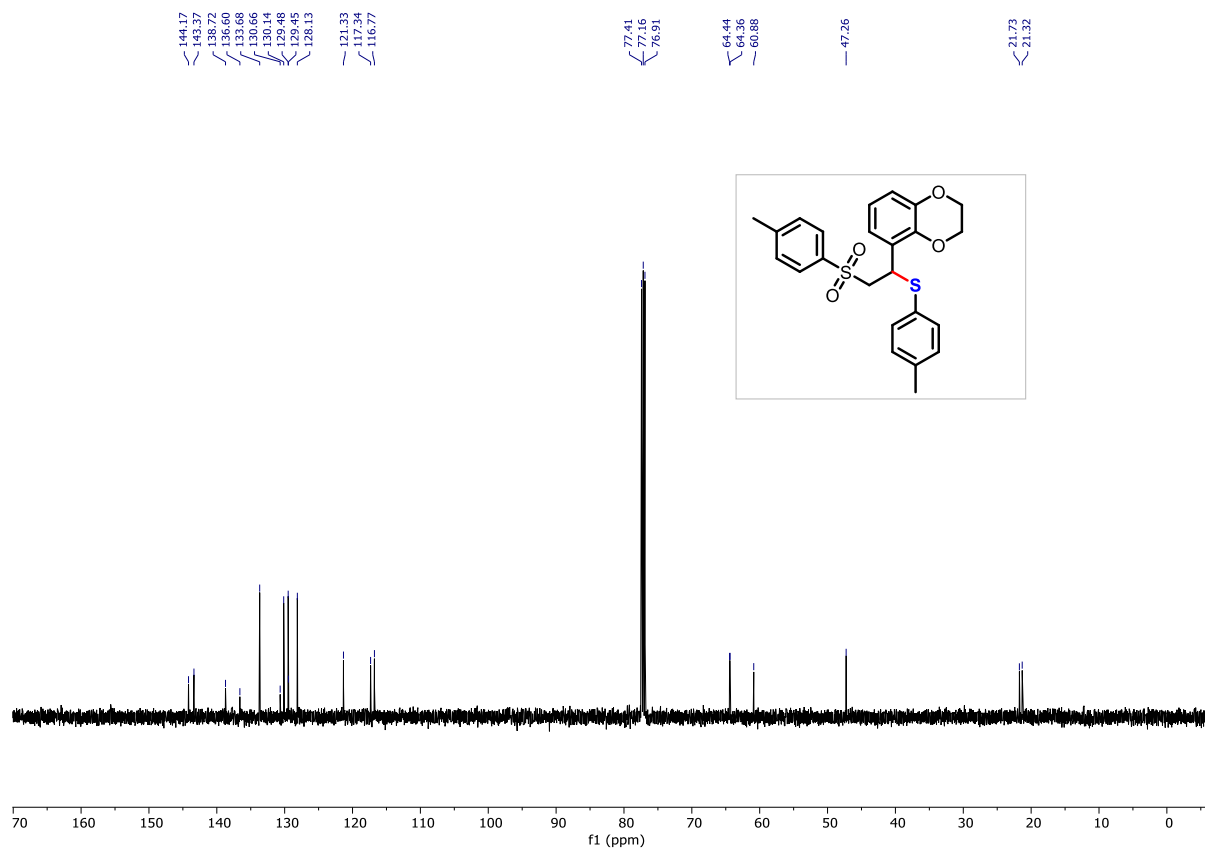

# ***N*-(4-Bromobenzyl) aniline (4aa)**

**<sup>1</sup>H NMR (500 MHz, CDCl<sub>3</sub>)**

7.44  
7.32  
7.20  
7.17  
7.15  
7.13  
6.72  
6.71  
6.58  
6.57

4.25  
4.02

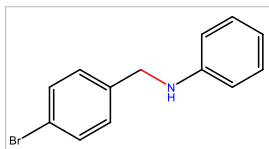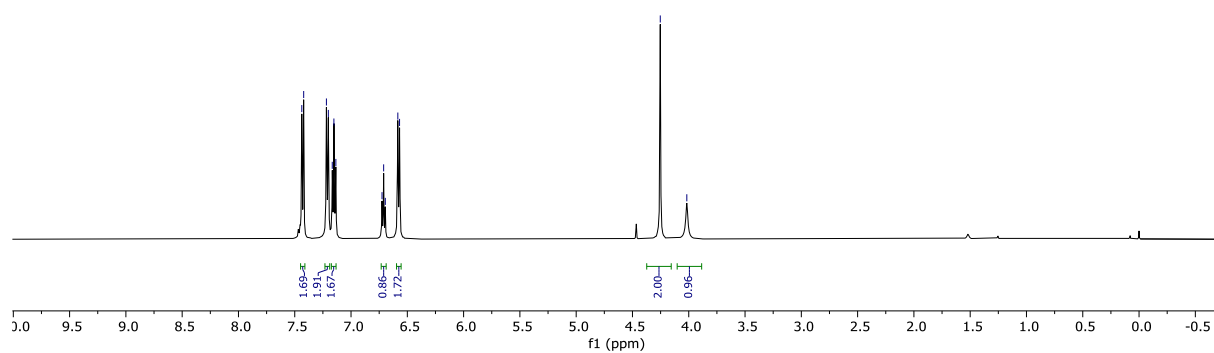

**<sup>13</sup>C{<sup>1</sup>H} NMR (126 MHz CDCl<sub>3</sub>)**

147.91  
138.66  
131.81  
129.42  
129.16  
121.03  
117.93  
113.01

77.42  
77.16  
76.91  
47.76

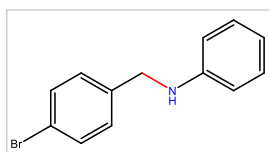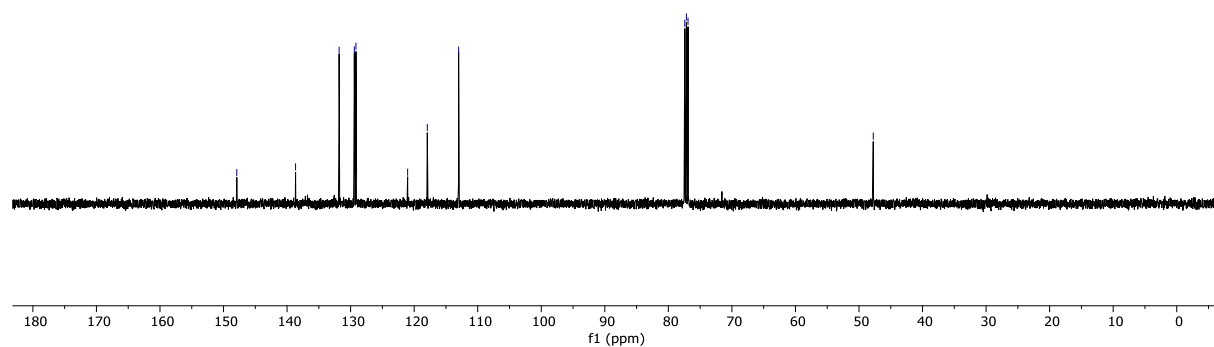

# *N*-(4-Bromobenzyl)-4-methylaniline (4ab)

$^1\text{H}$  NMR (500 MHz,  $\text{CDCl}_3$ )

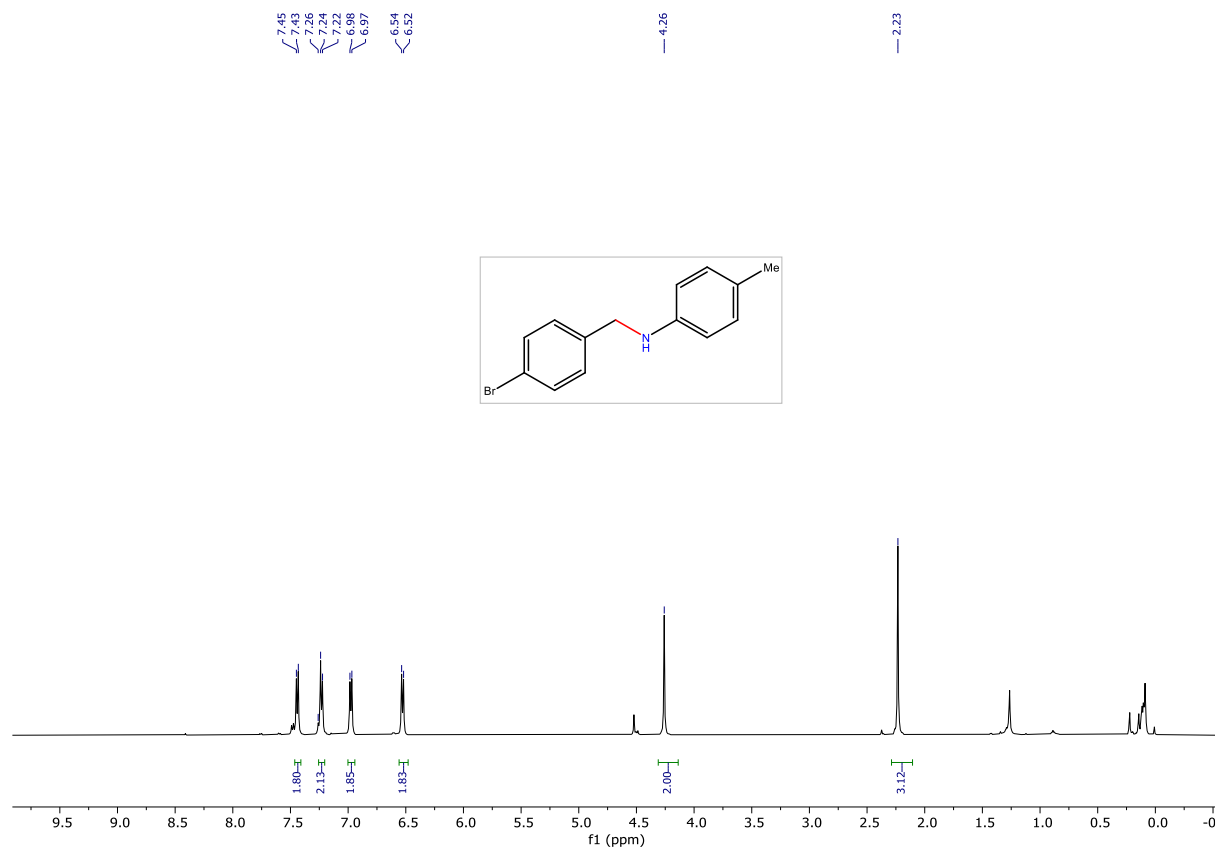

$^{13}\text{C}\{^1\text{H}\}$  NMR (126 MHz  $\text{CDCl}_3$ )

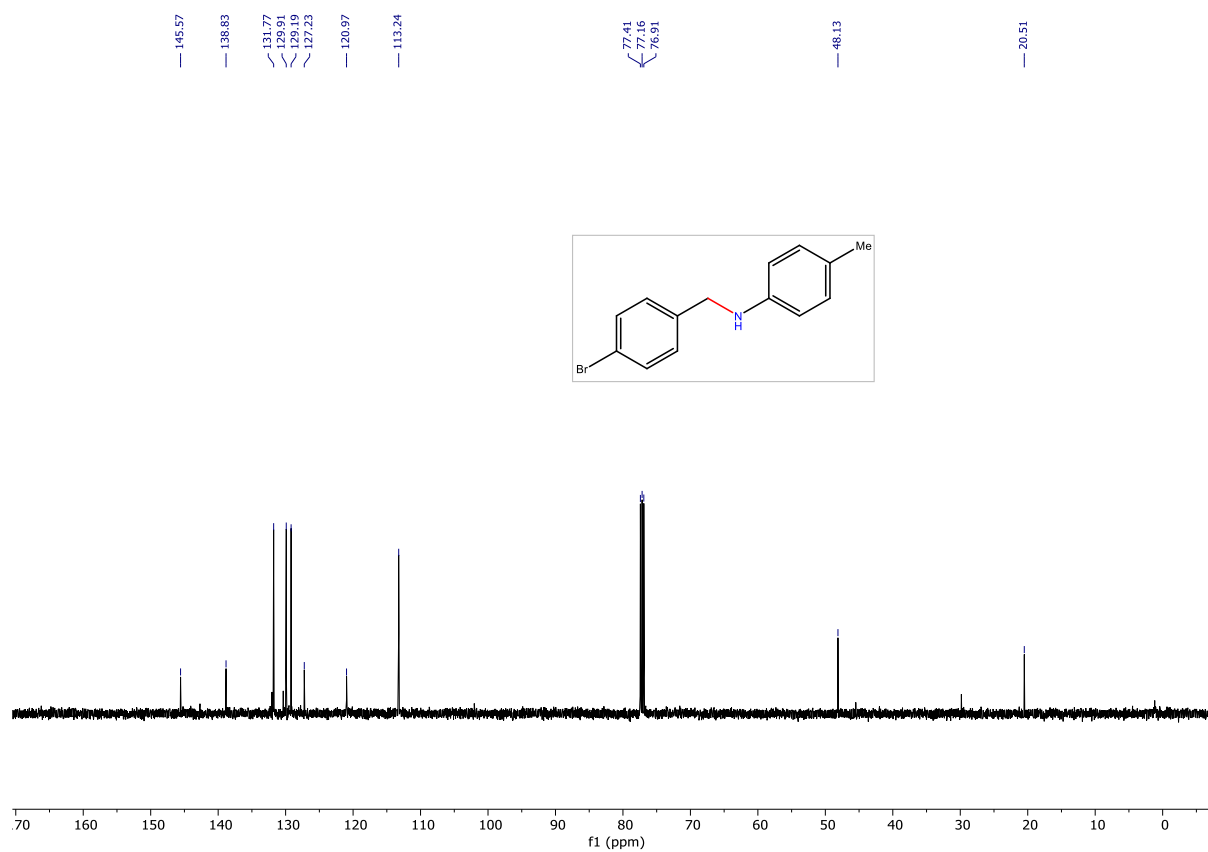

### 4-Bromo-N-(4-bromobenzyl) aniline (4ac)

$^1\text{H}$  NMR (500 MHz,  $\text{CDCl}_3$ )

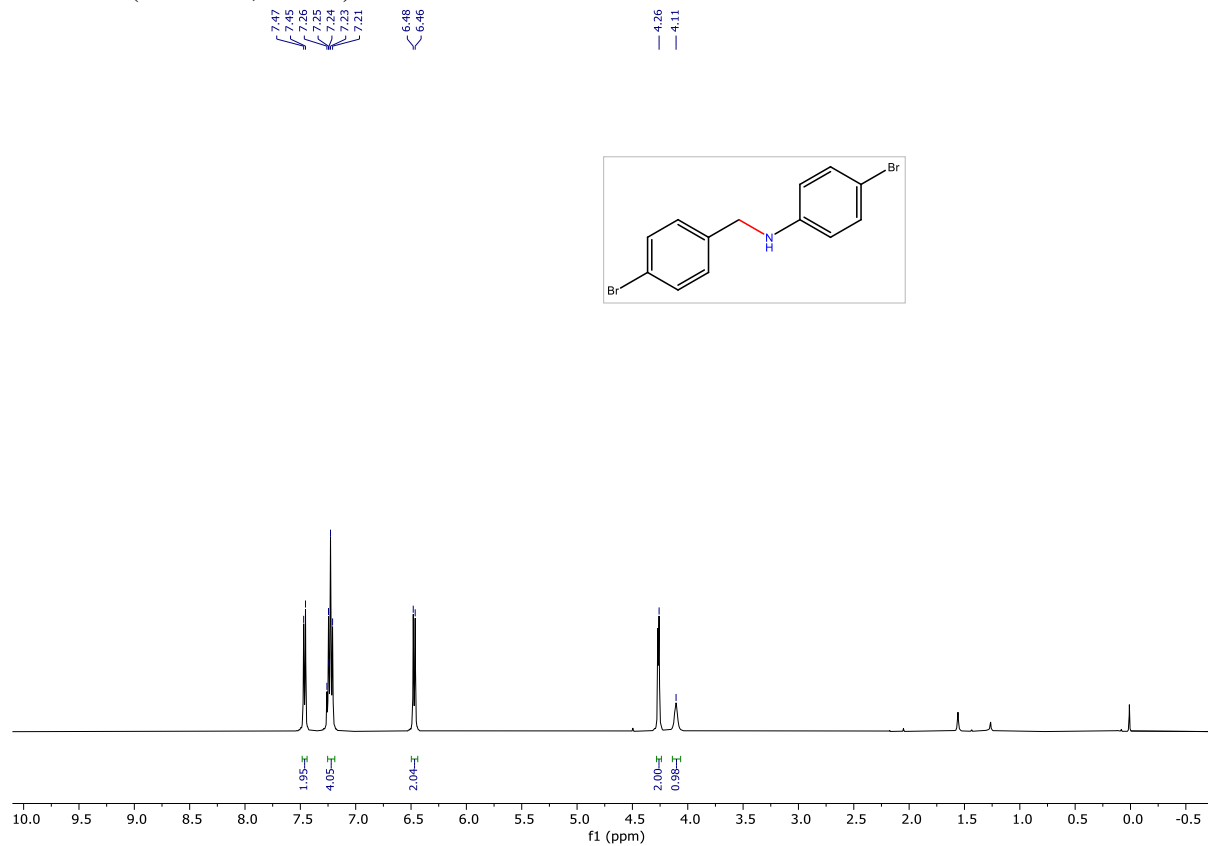

$^{13}\text{C}\{^1\text{H}\}$  NMR (126 MHz  $\text{CDCl}_3$ )

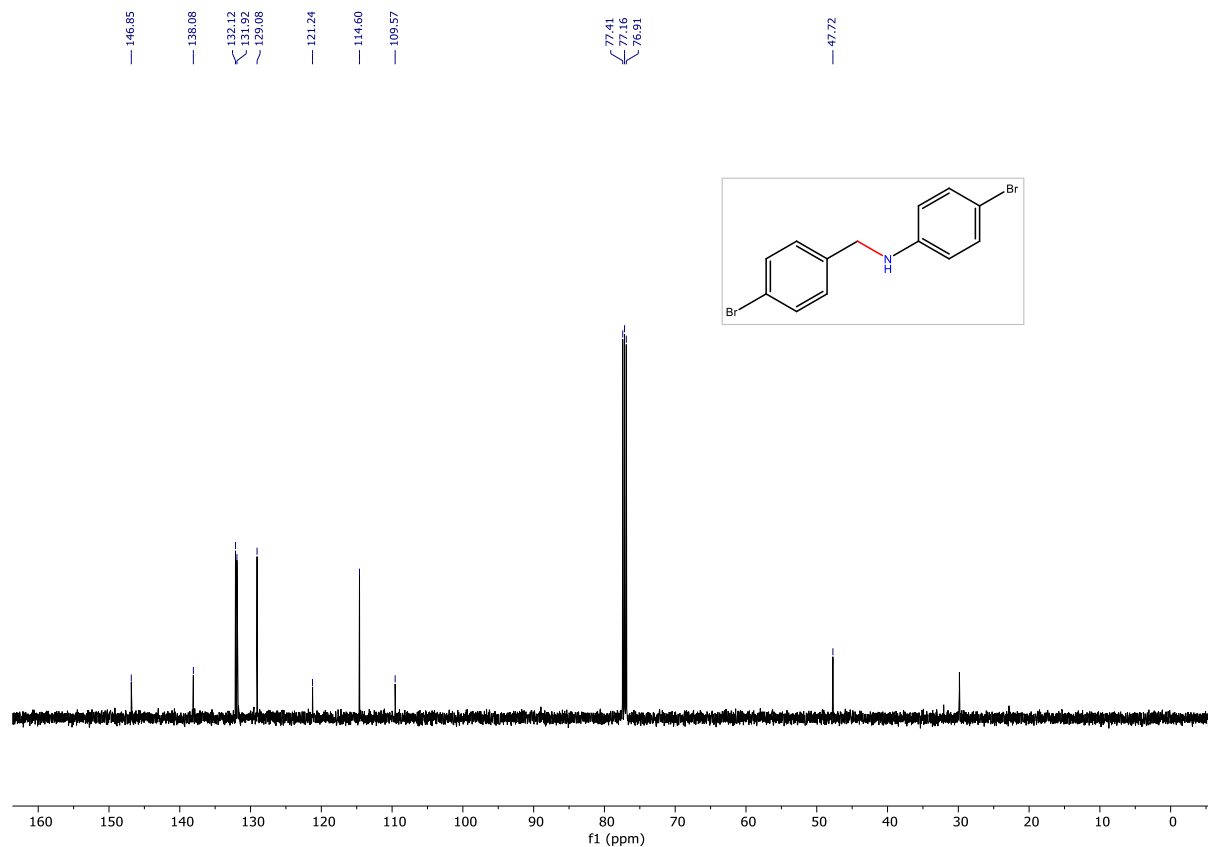

# 4-((4-Bromobenzyl) amino) benzonitrile (4ad)

$^1\text{H}$  NMR (500 MHz,  $\text{CDCl}_3$ )

7.48  
7.47  
7.46  
7.40  
7.26  
7.21  
7.19  
6.57  
6.56  
4.65  
4.35  
4.33

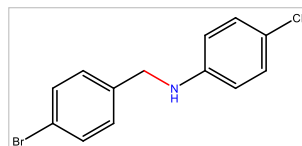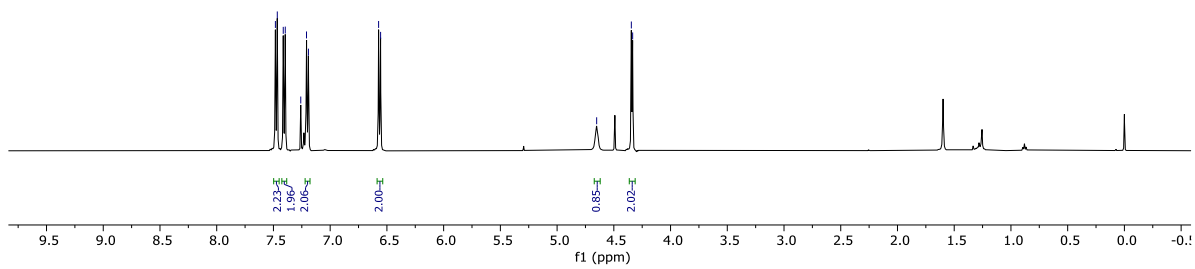

$^{13}\text{C}\{^1\text{H}\}$  NMR (126 MHz  $\text{CDCl}_3$ )

150.95  
137.00  
133.87  
132.09  
128.98  
121.59  
120.37  
112.61  
99.56  
77.41  
77.16  
76.90  
46.98

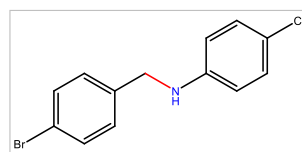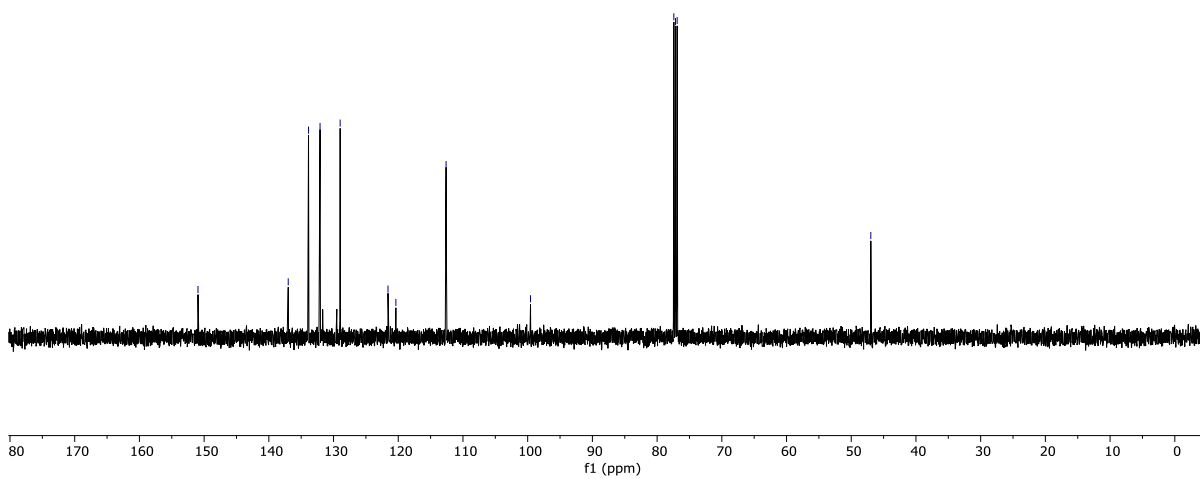

# ***N*-(4-Bromobenzyl)-4-nitroaniline (4ae)**

**<sup>1</sup>H NMR (500 MHz, DMSO-*d*<sub>6</sub>)**

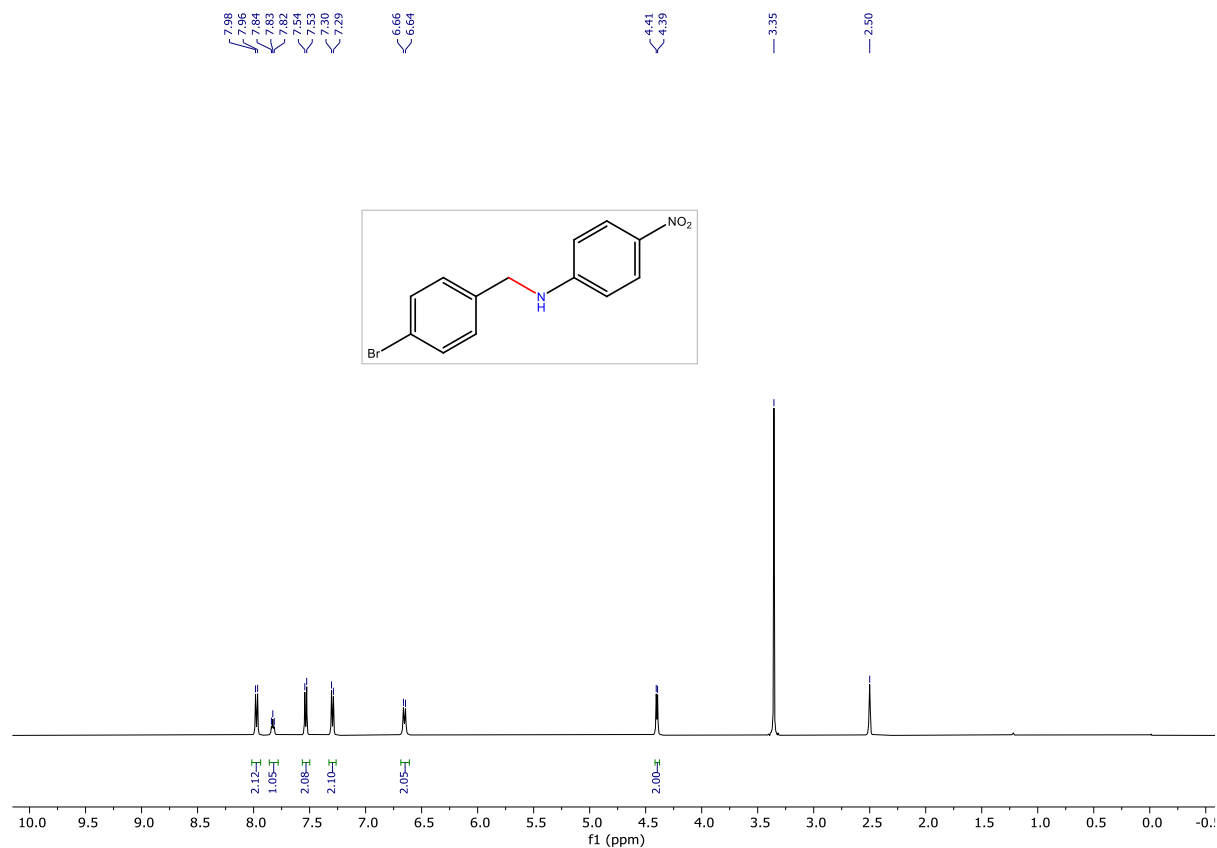

**<sup>13</sup>C{<sup>1</sup>H} NMR (126 MHz DMSO-*d*<sub>6</sub>)**

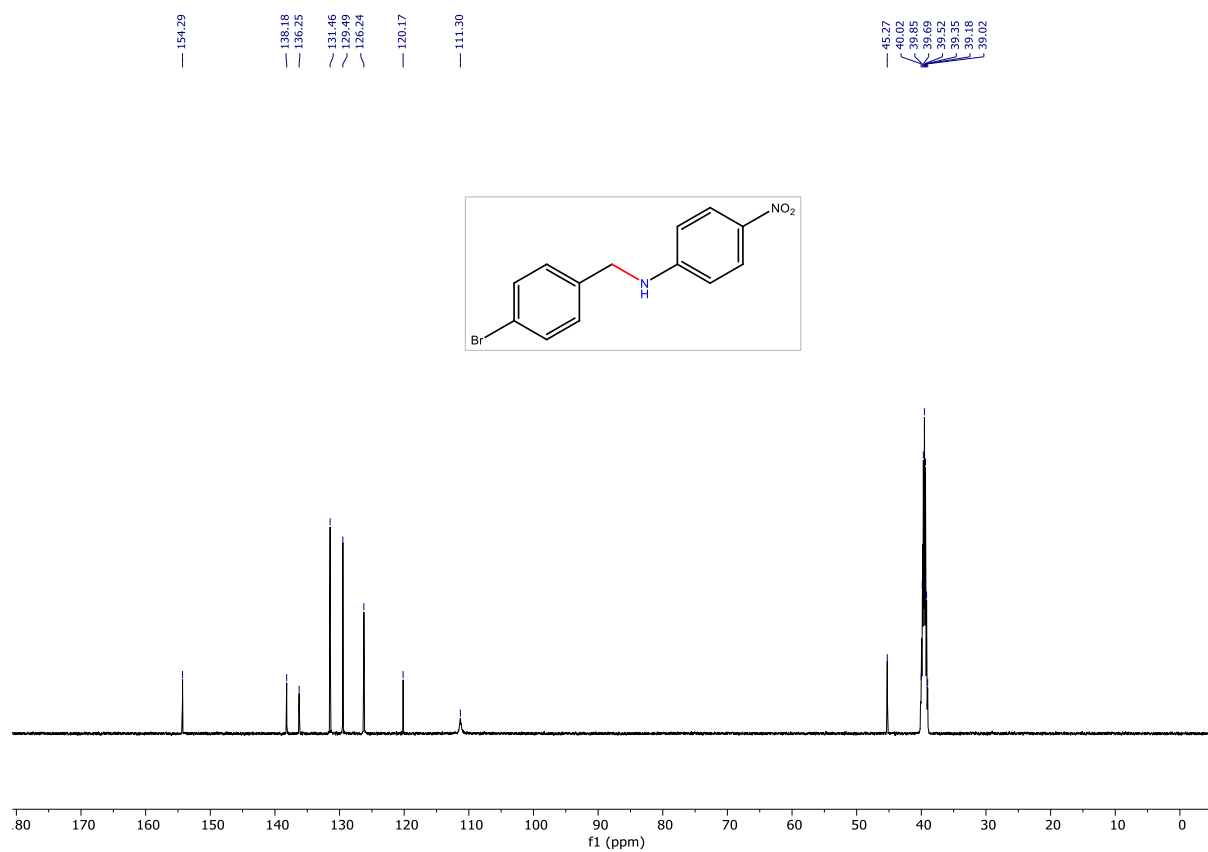

# N-Benzyl-4-bromoaniline (4af)

$^1\text{H}$  NMR (500 MHz  $\text{CDCl}_3$ )

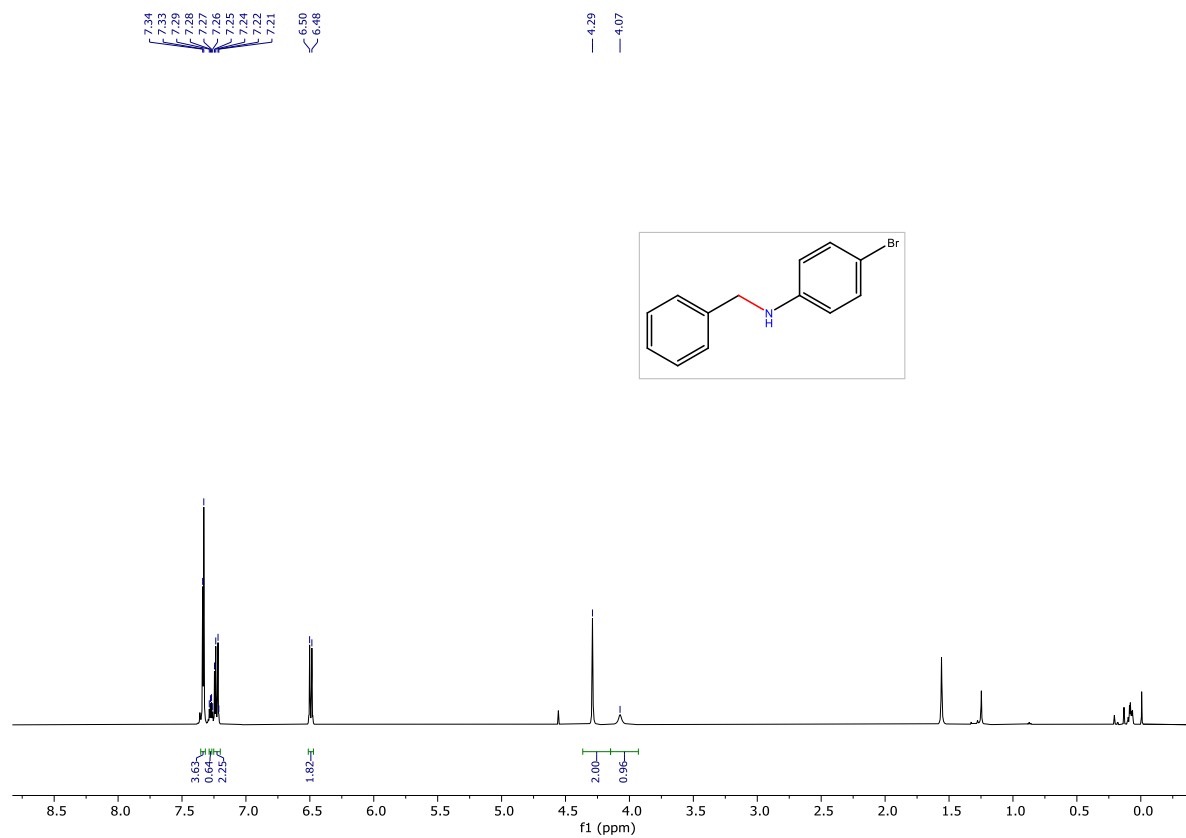

$^{13}\text{C}\{^1\text{H}\}$  NMR (126 MHz  $\text{CDCl}_3$ )

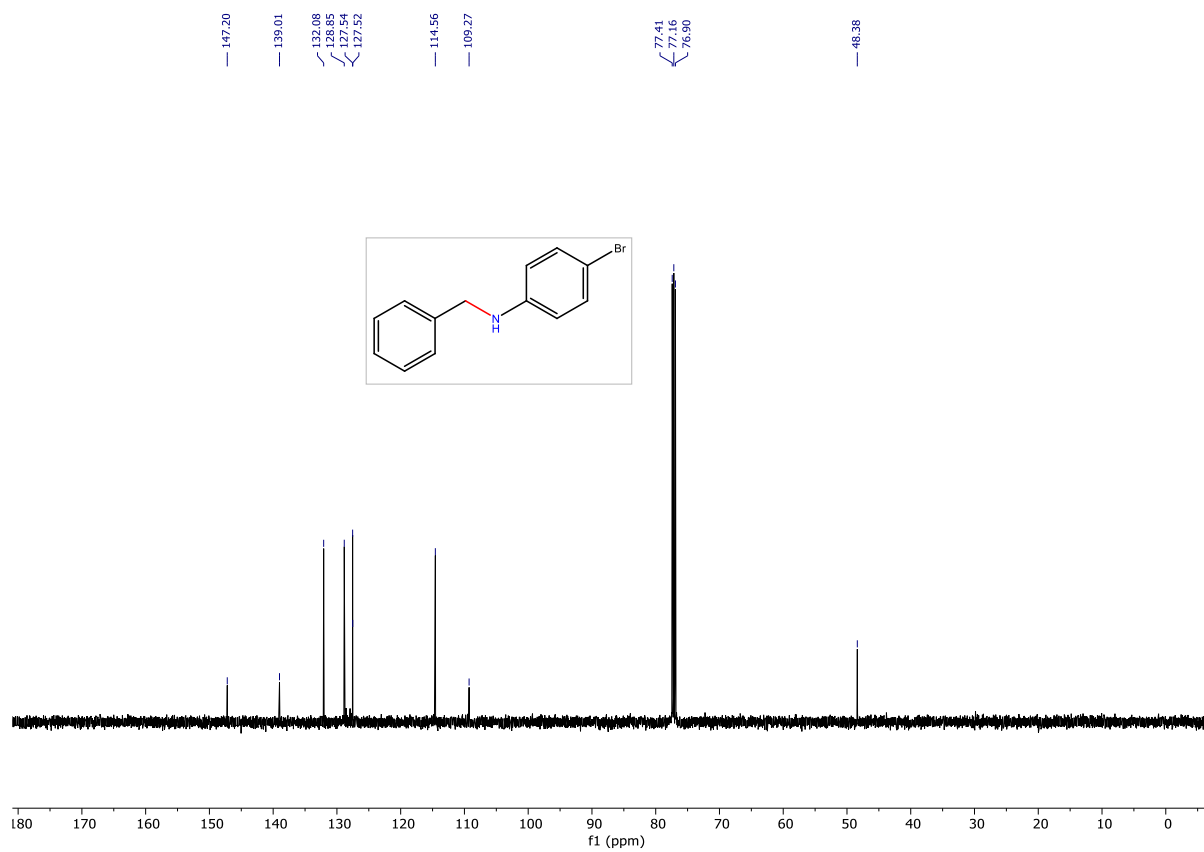

# 4-Bromo-N-(4-methylbenzyl) aniline (4ag)

$^1\text{H}$  NMR (500 MHz  $\text{CDCl}_3$ )

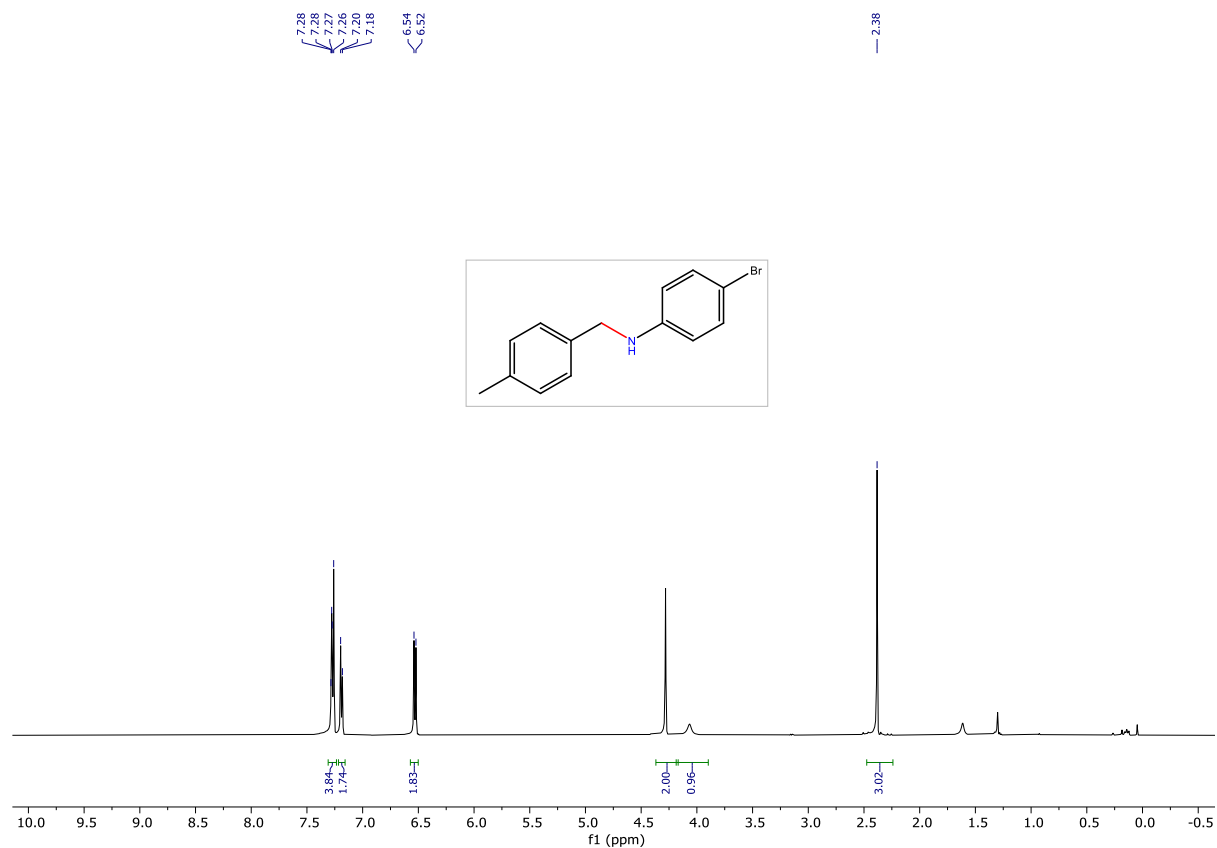

$^{13}\text{C}\{^1\text{H}\}$  NMR (126 MHz  $\text{CDCl}_3$ )

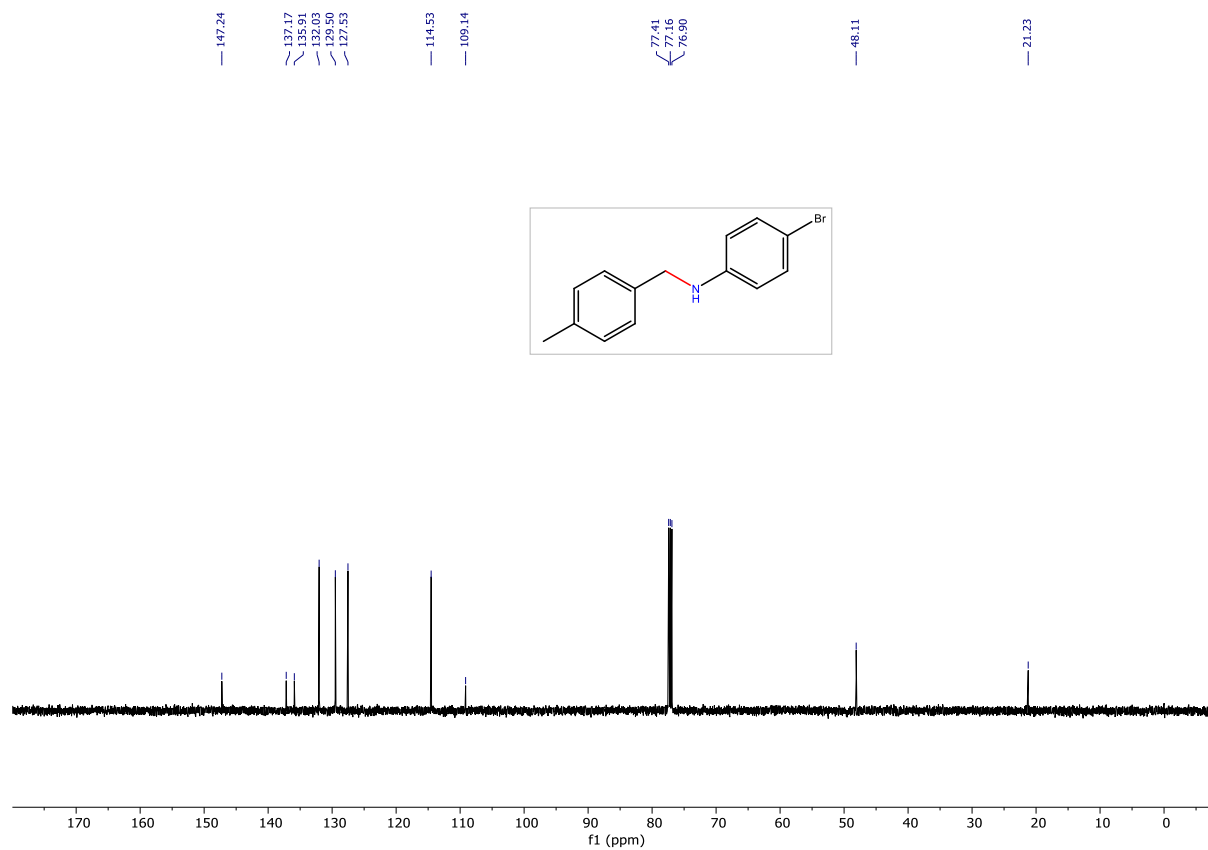



# 4-(((4-Bromophenyl) amino) methyl) benzonitrile (4ah)

$^1\text{H}$  NMR (500 MHz  $\text{CDCl}_3$ )

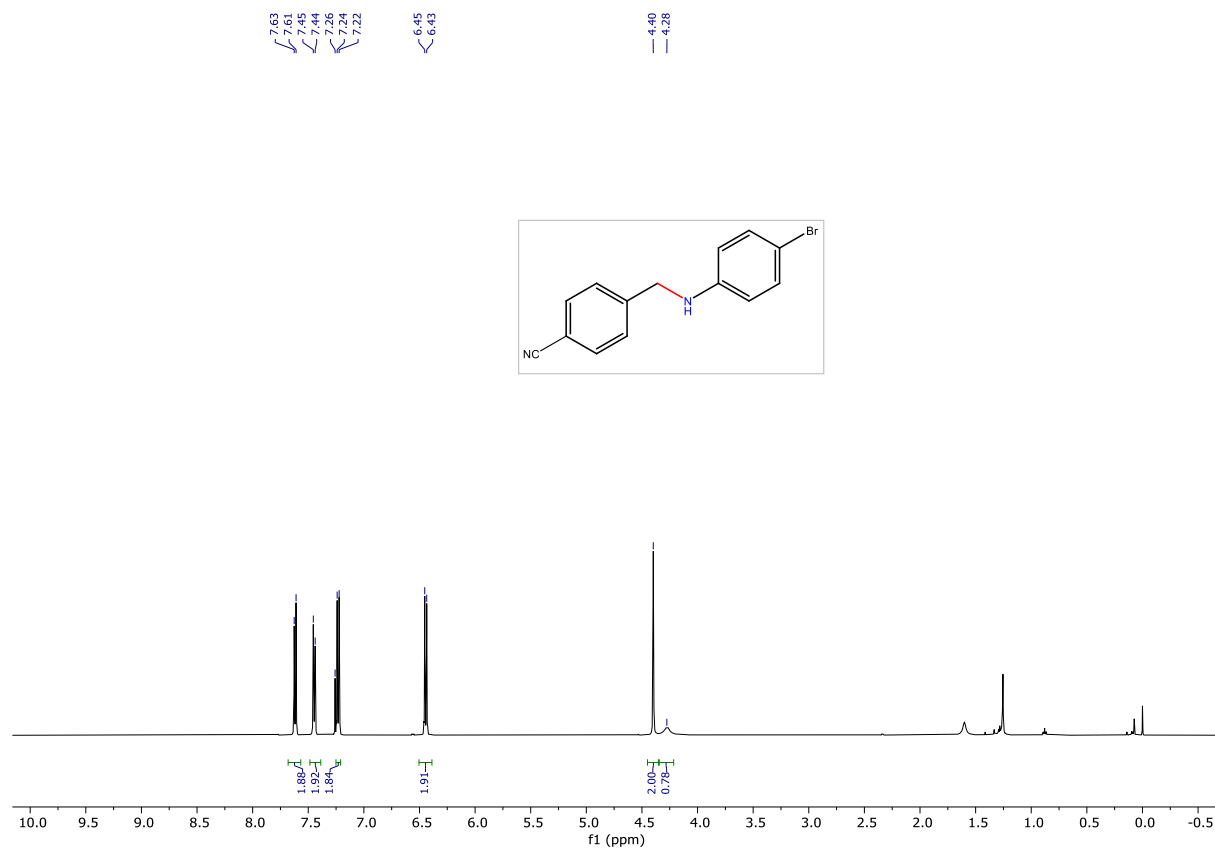

$^{13}\text{C}\{^1\text{H}\}$  NMR (126 MHz  $\text{CDCl}_3$ )

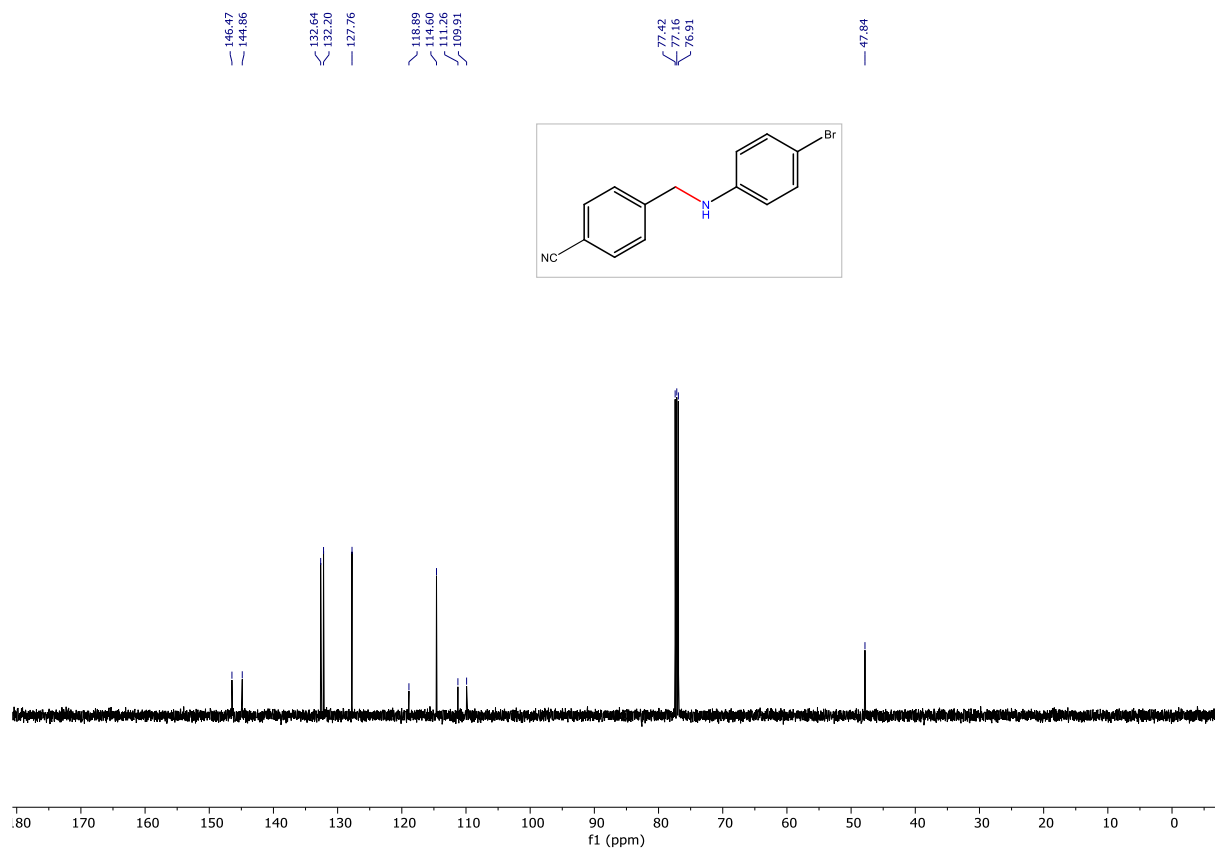

### 4-Bromo-N-(4-nitrobenzyl) aniline (4ai)

$^1\text{H}$  NMR (500 MHz  $\text{CDCl}_3$ )

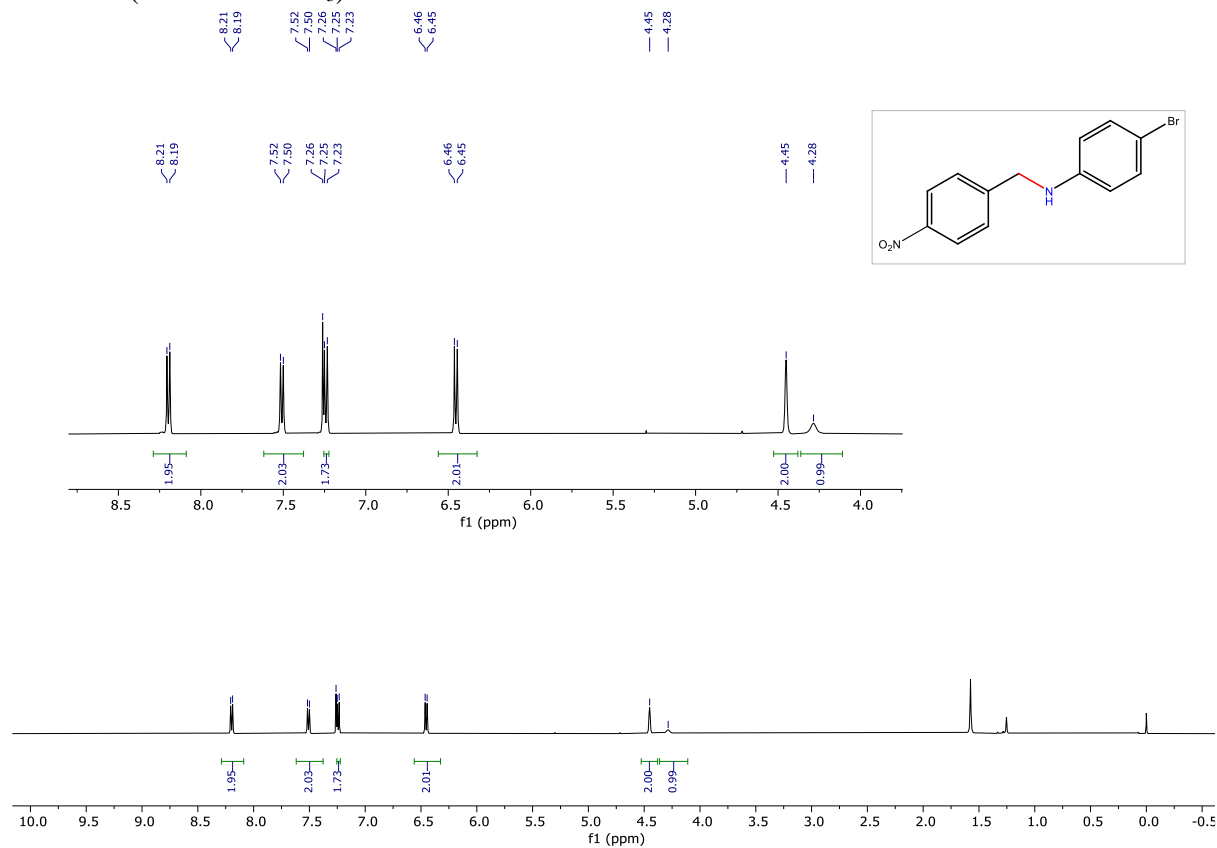

$^{13}\text{C}\{^1\text{H}\}$  NMR (126 MHz  $\text{CDCl}_3$ )

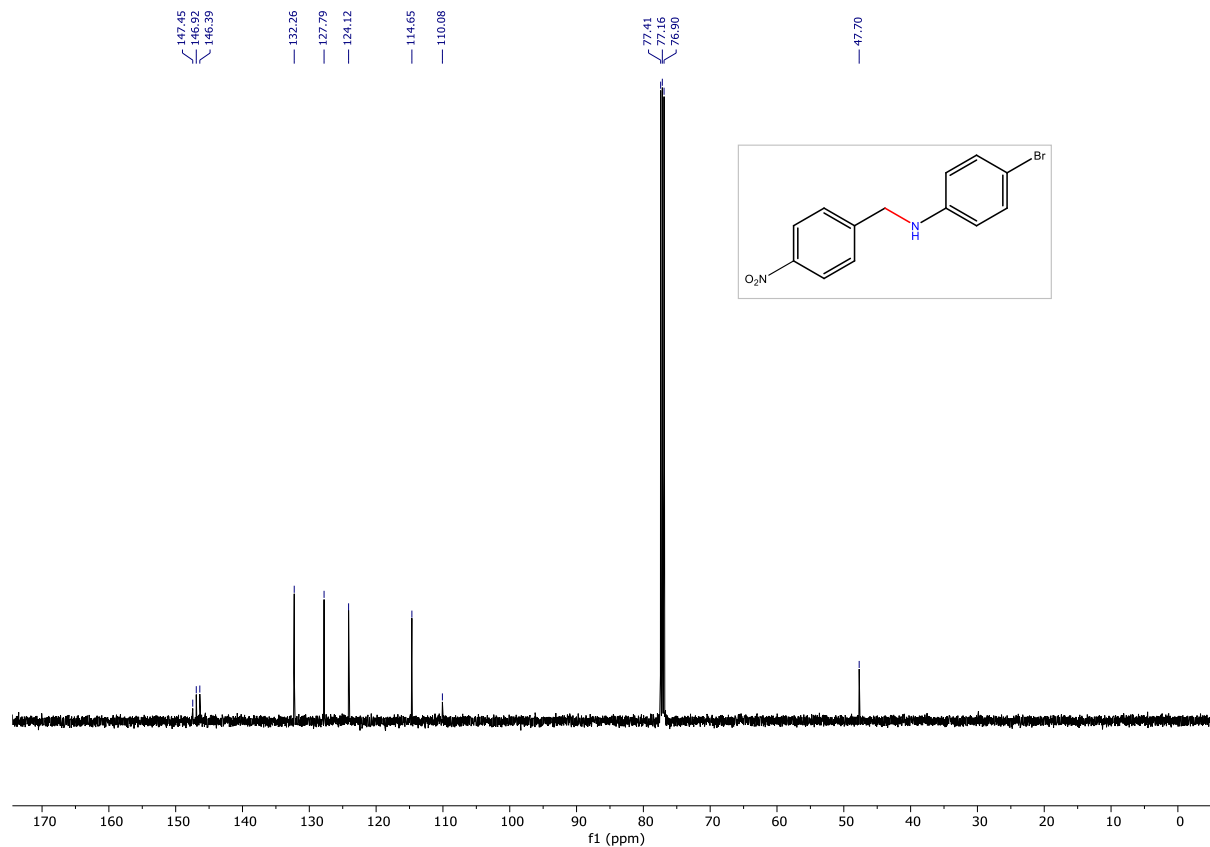

**(Chloromethyl)benzene (5aa)**

**<sup>1</sup>H NMR (500 MHz, CDCl<sub>3</sub>)**

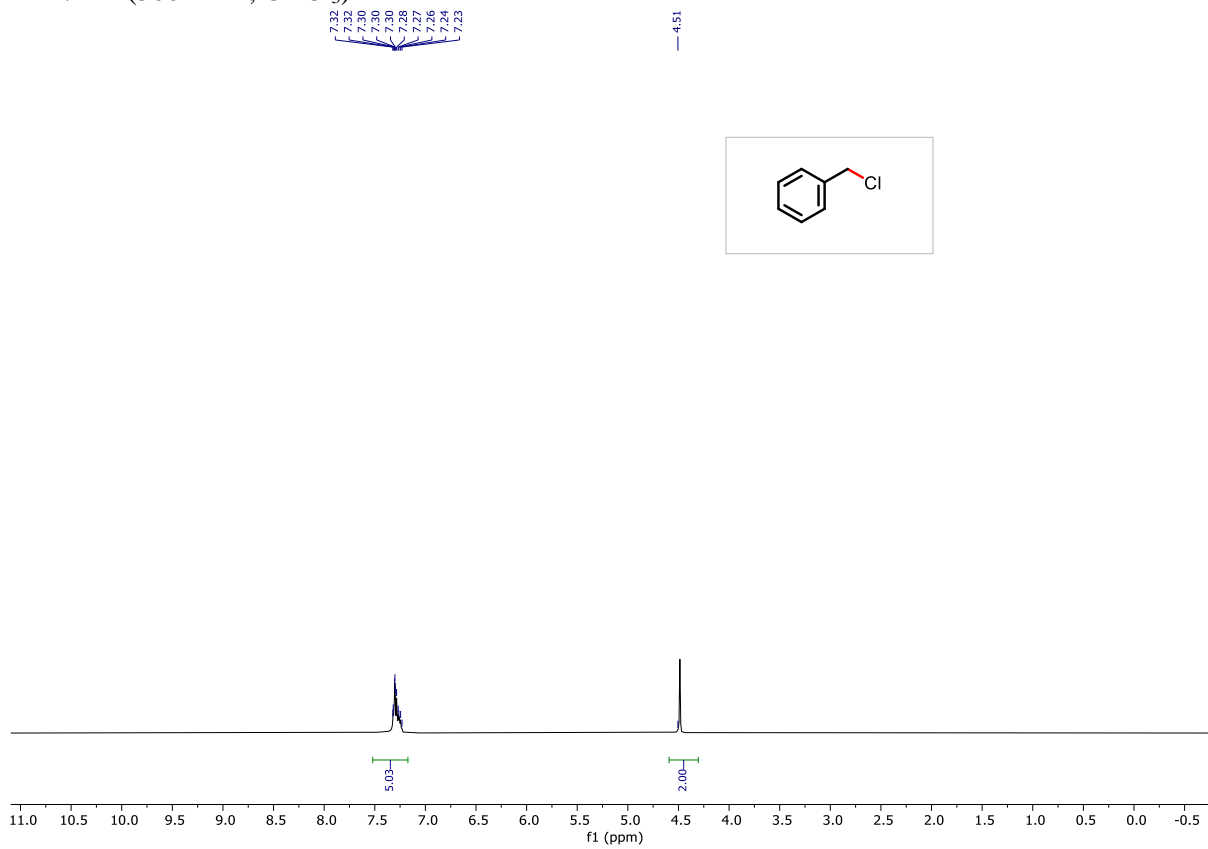

**<sup>13</sup>C NMR (126 MHz, CDCl<sub>3</sub>)**

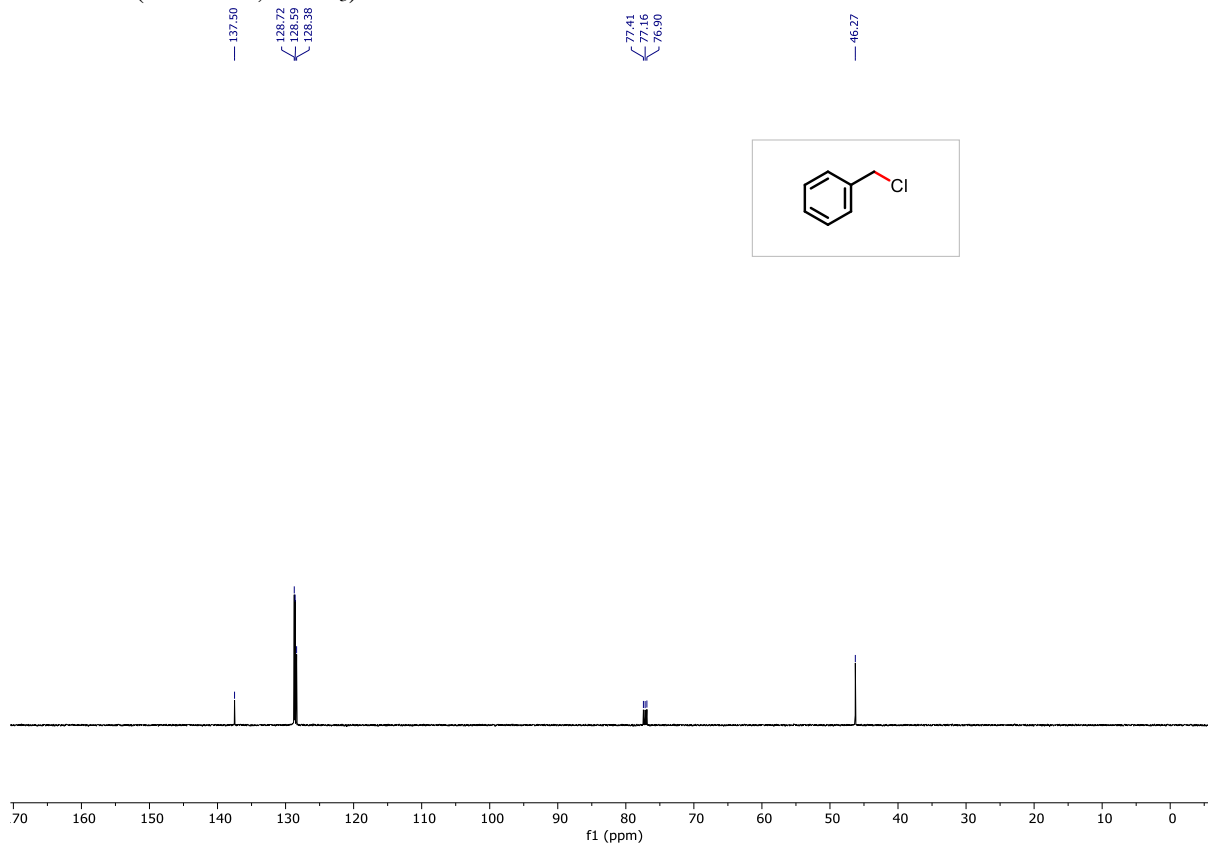

# 1-Bromo-4-(chloromethyl) benzene (5ab)

$^1\text{H NMR}$  (500 MHz,  $\text{CDCl}_3$ )

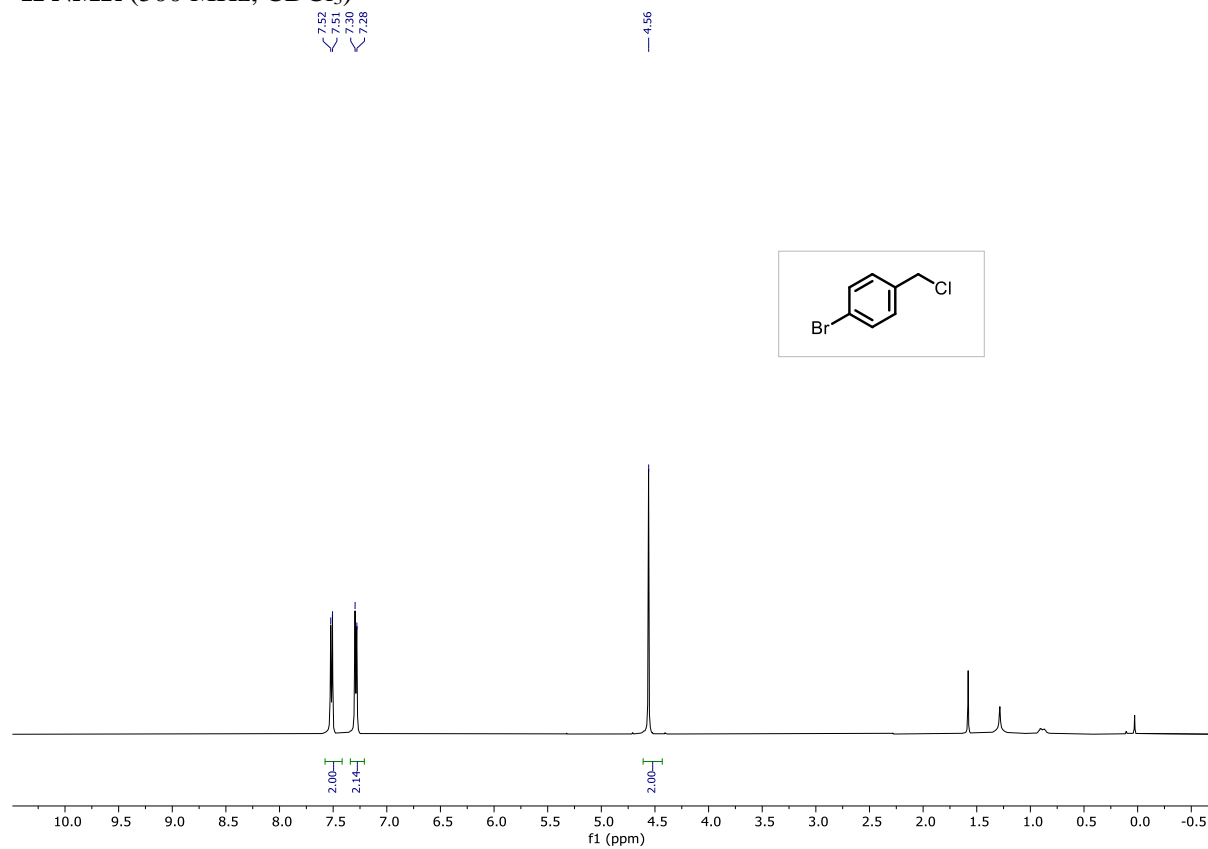

$^{13}\text{C NMR}$  (126 MHz,  $\text{CDCl}_3$ )

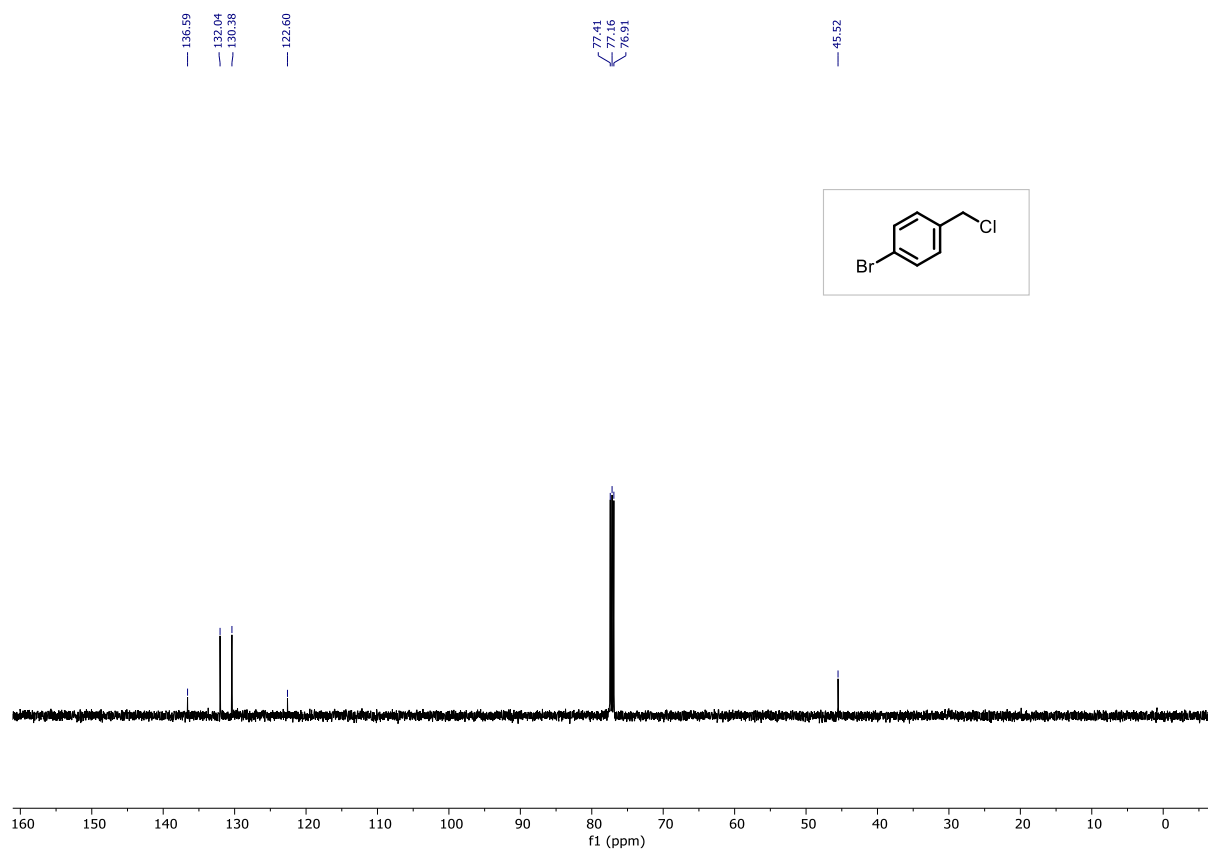

# 1-Chloro-4-(chloromethyl) benzene (5ac)

$^1\text{H}$  NMR (500 MHz,  $\text{CDCl}_3$ )

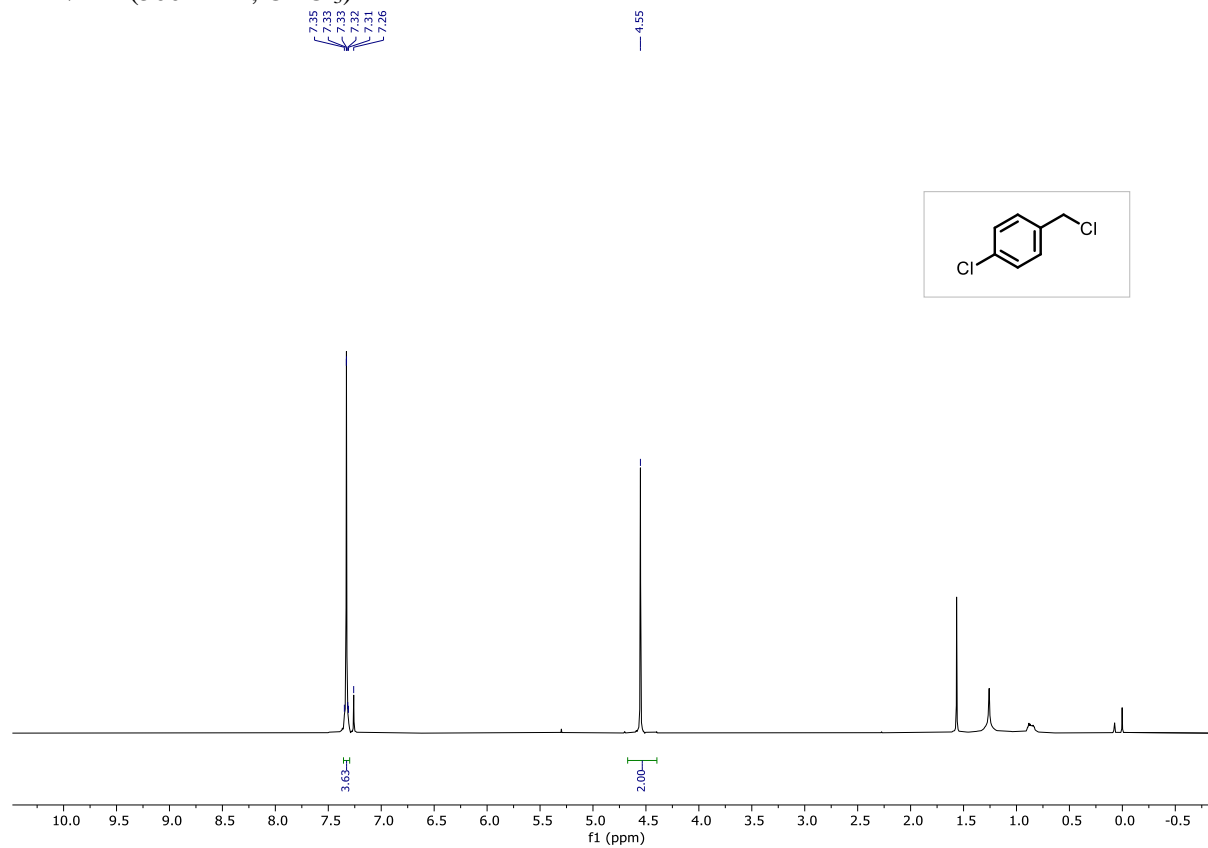

$^{13}\text{C}$  NMR (126 MHz,  $\text{CDCl}_3$ )

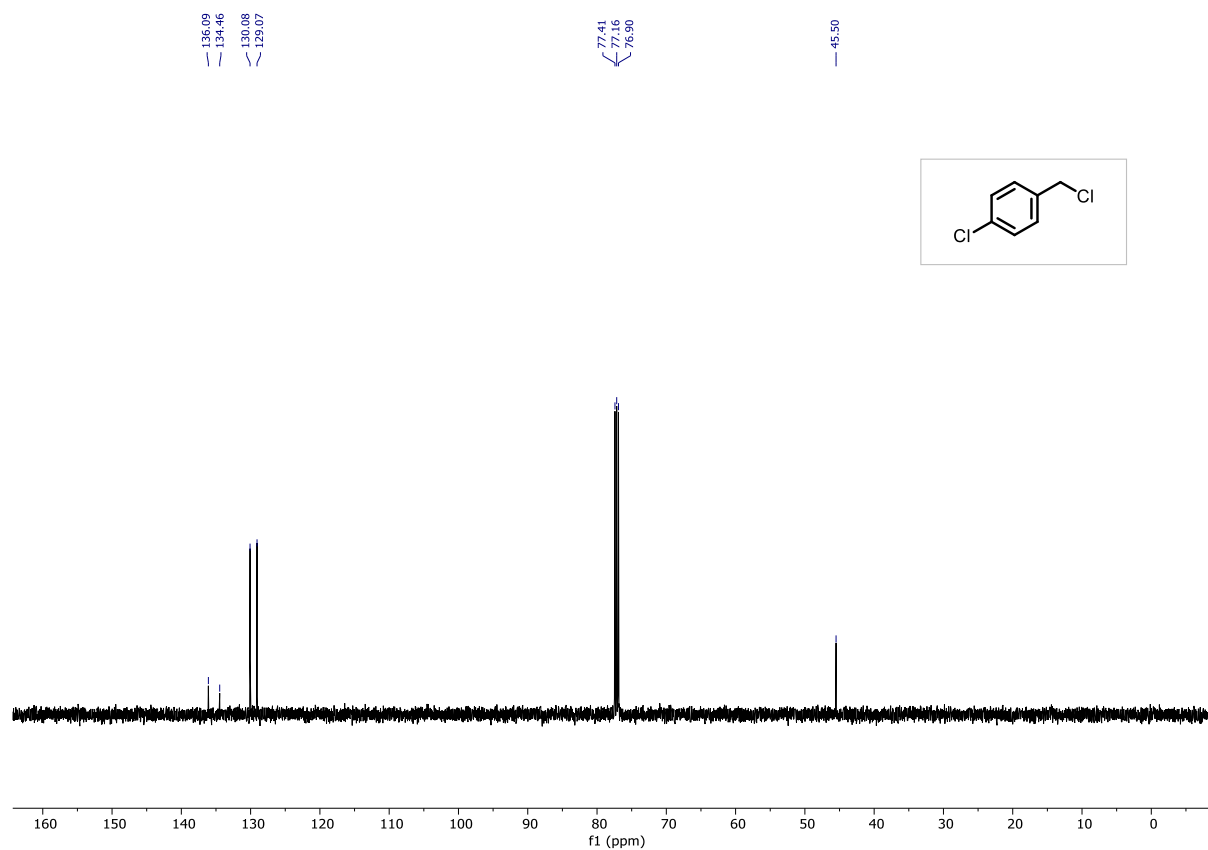

# 1-Bromo-4-(1-chloroethyl) benzene (5ad)

$^1\text{H NMR}$  (500 MHz,  $\text{CDCl}_3$ )

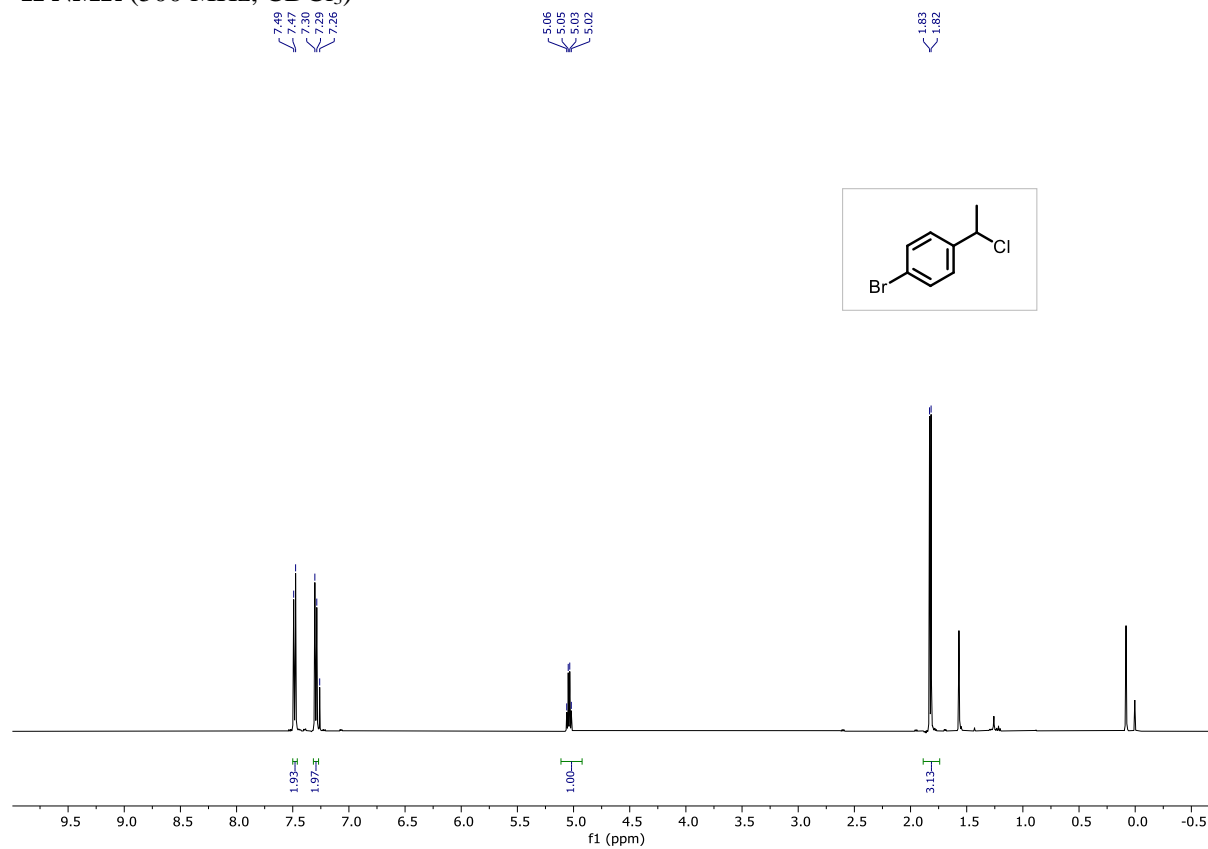

$^{13}\text{C NMR}$  (126 MHz,  $\text{CDCl}_3$ )

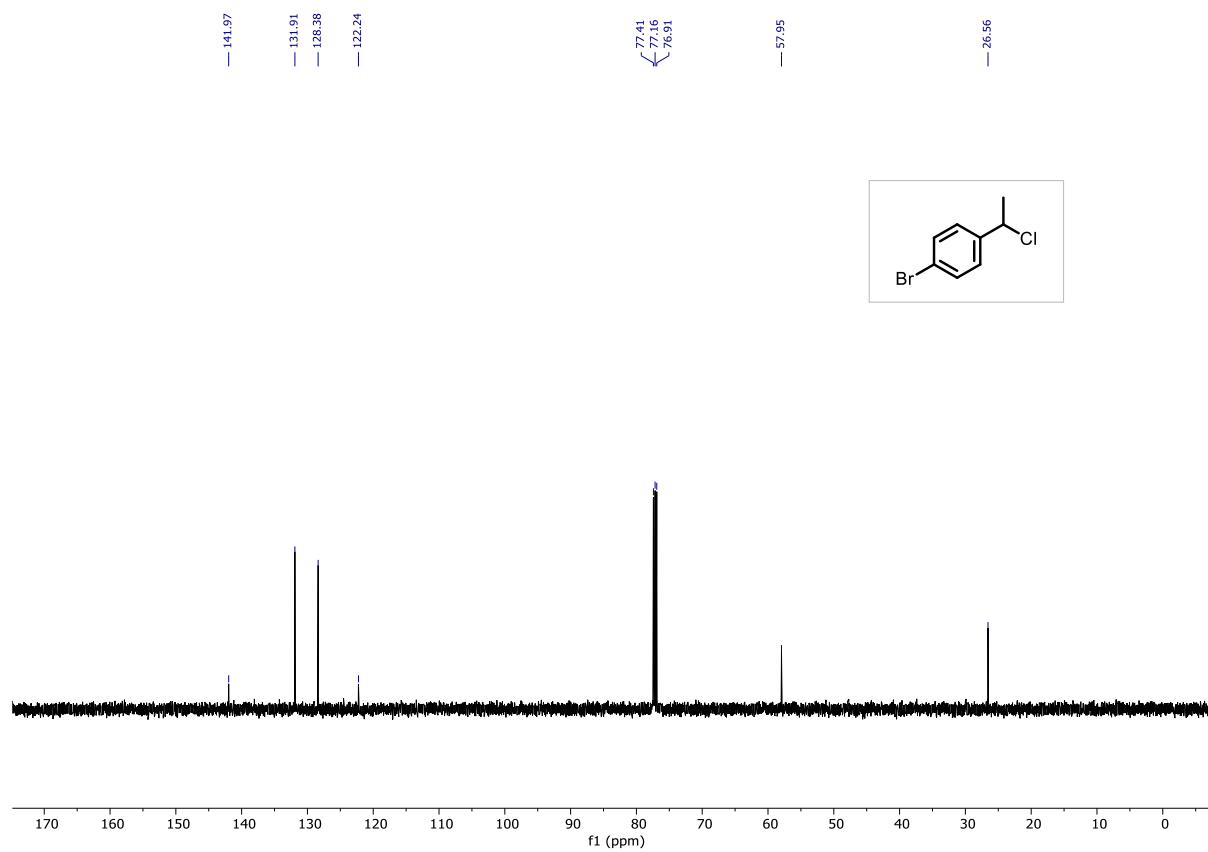

# 1-Chloro-4-(iodomethyl) benzene (5ae)

$^1\text{H}$  NMR (500 MHz,  $\text{CDCl}_3$ )

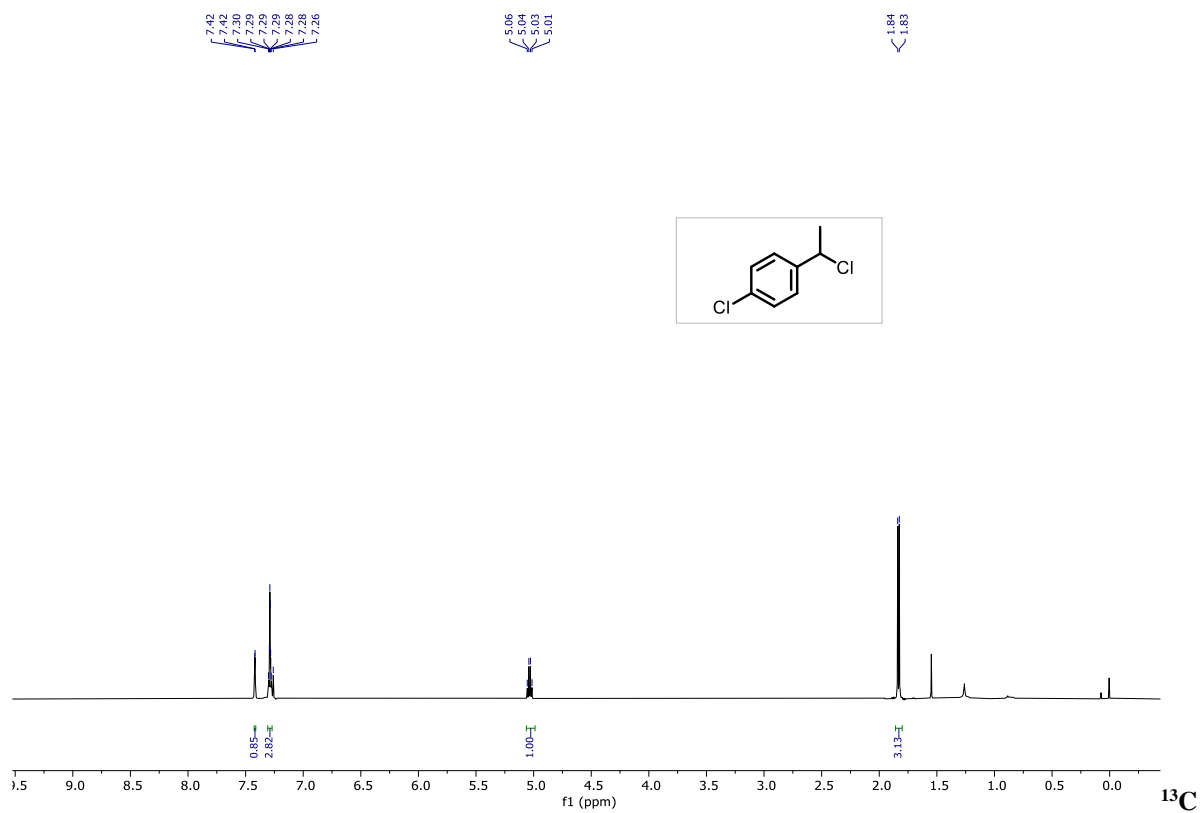

$^{13}\text{C}$  NMR (126 MHz,  $\text{CDCl}_3$ )

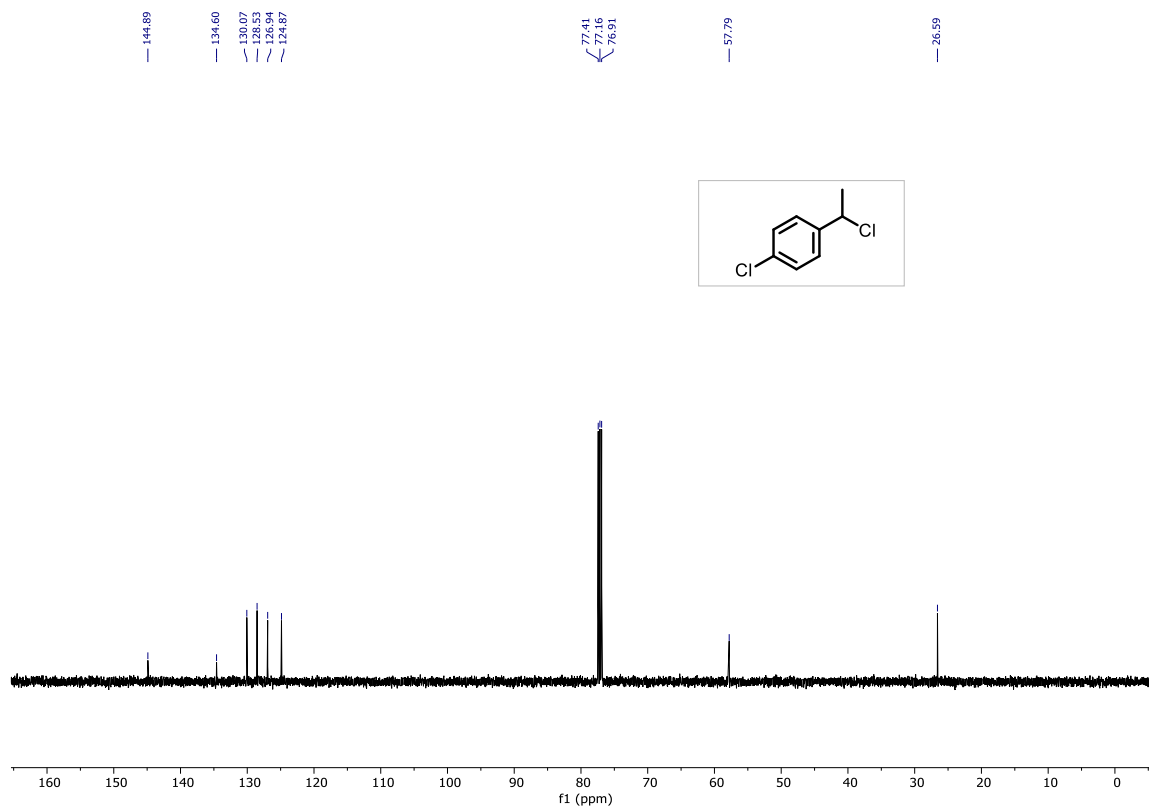

# (Iodomethyl)benzene (5af)

$^1\text{H NMR}$  (500 MHz,  $\text{CDCl}_3$ )

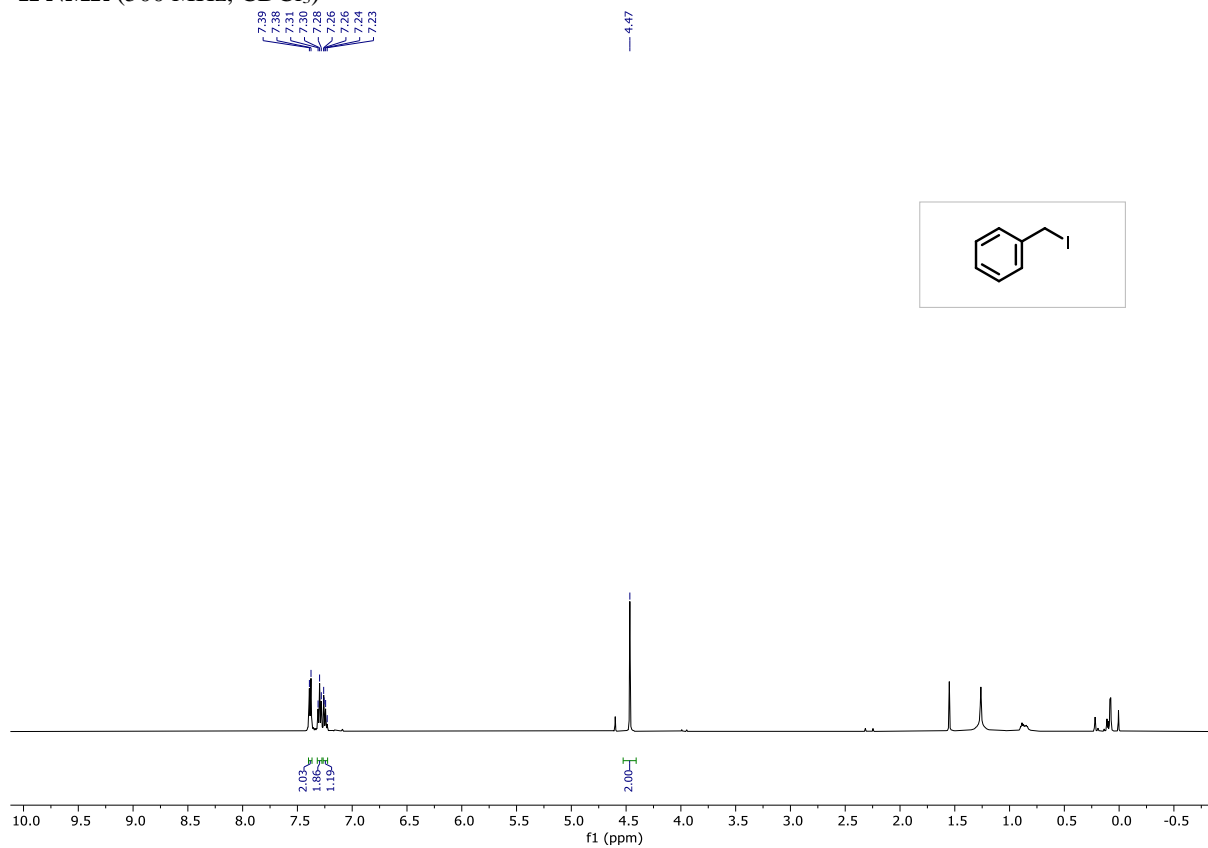

$^{13}\text{C NMR}$  (126 MHz,  $\text{CDCl}_3$ )

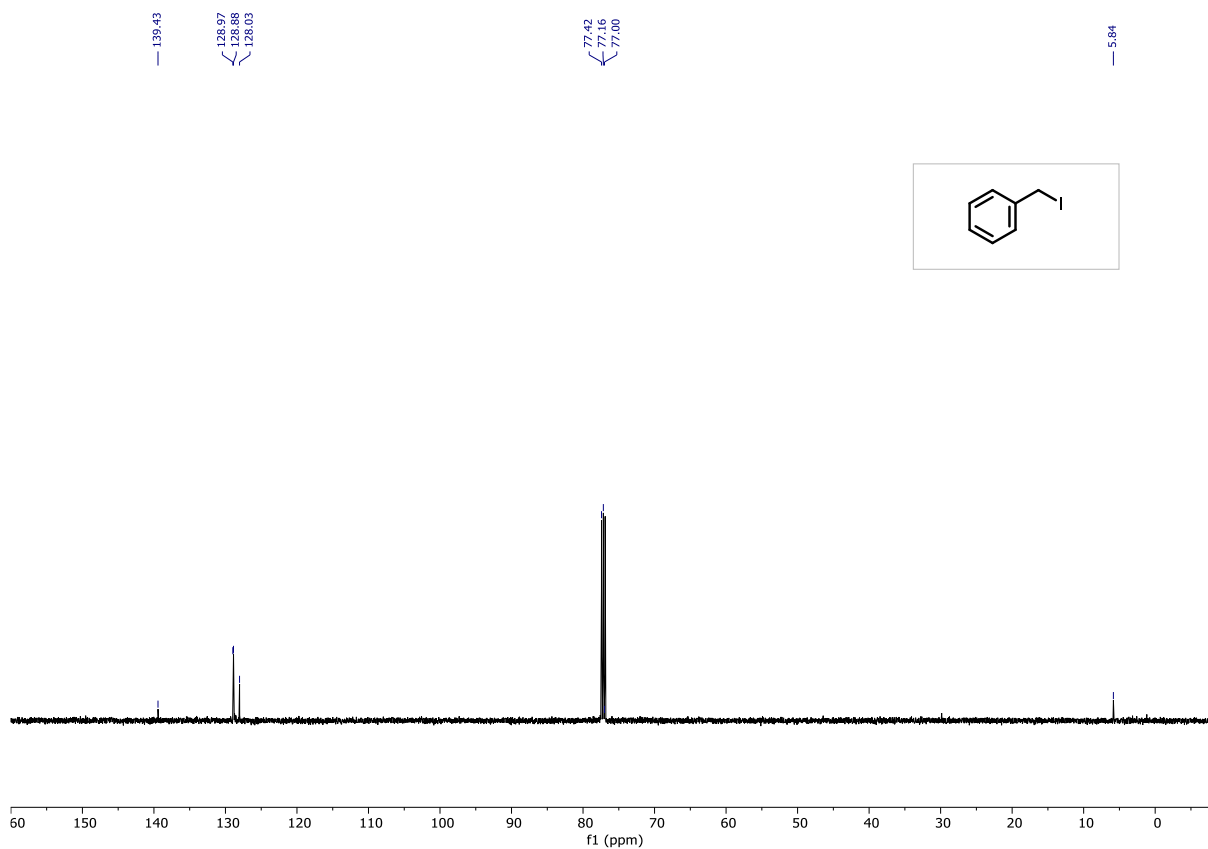



# 1-Bromo-4-(iodomethyl) benzene (5ag)

$^1\text{H}$  NMR (500 MHz,  $\text{CDCl}_3$ )

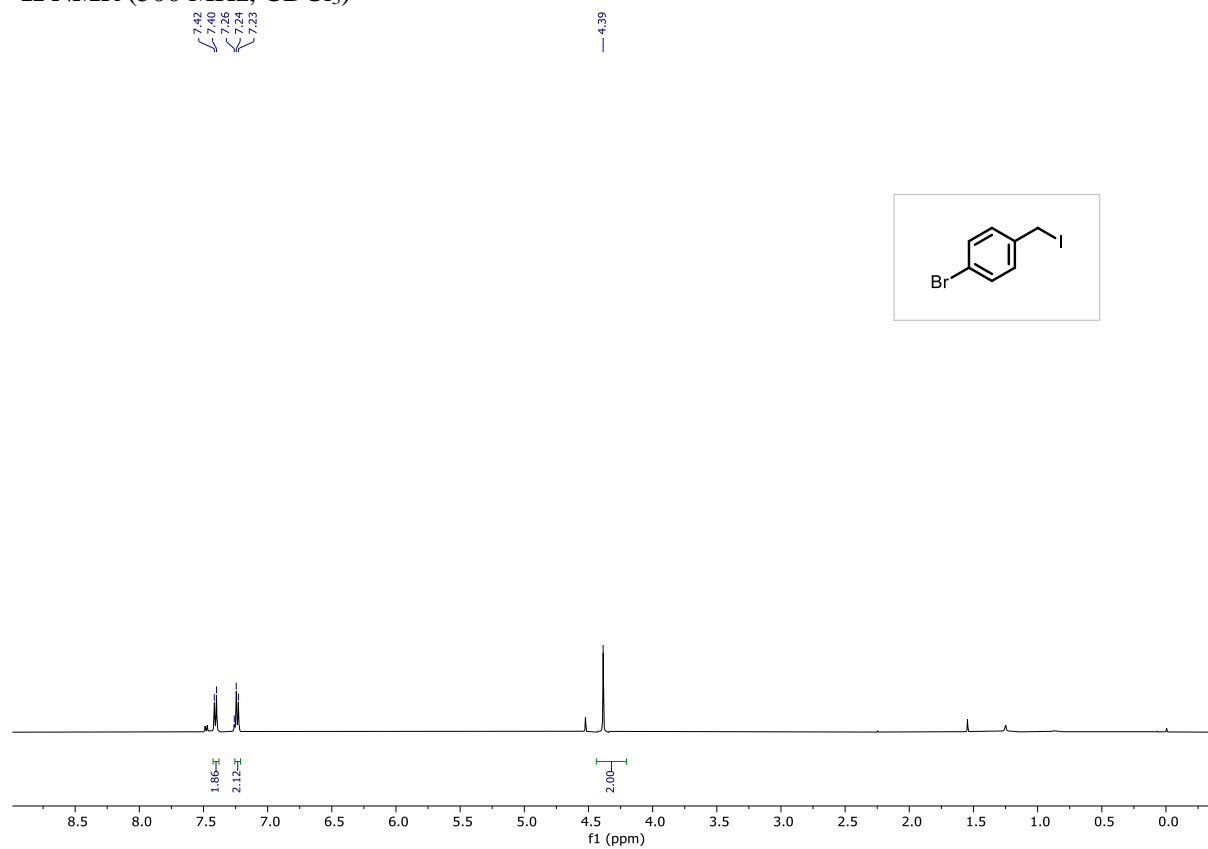

$^{13}\text{C}$  NMR (126 MHz,  $\text{CDCl}_3$ )

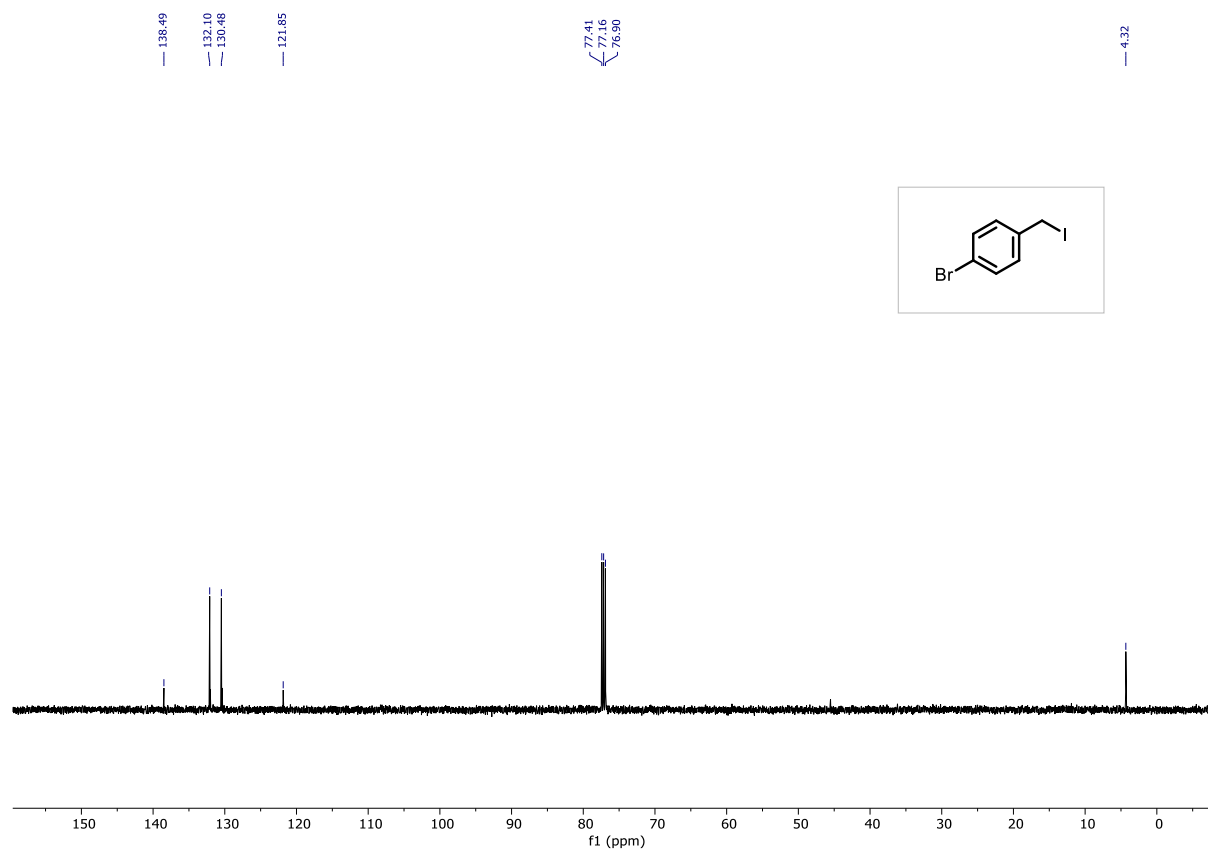

# 1-Bromo-4-(1-iodoethyl) benzene (5ah)

$^1\text{H NMR}$  (500 MHz,  $\text{CDCl}_3$ )

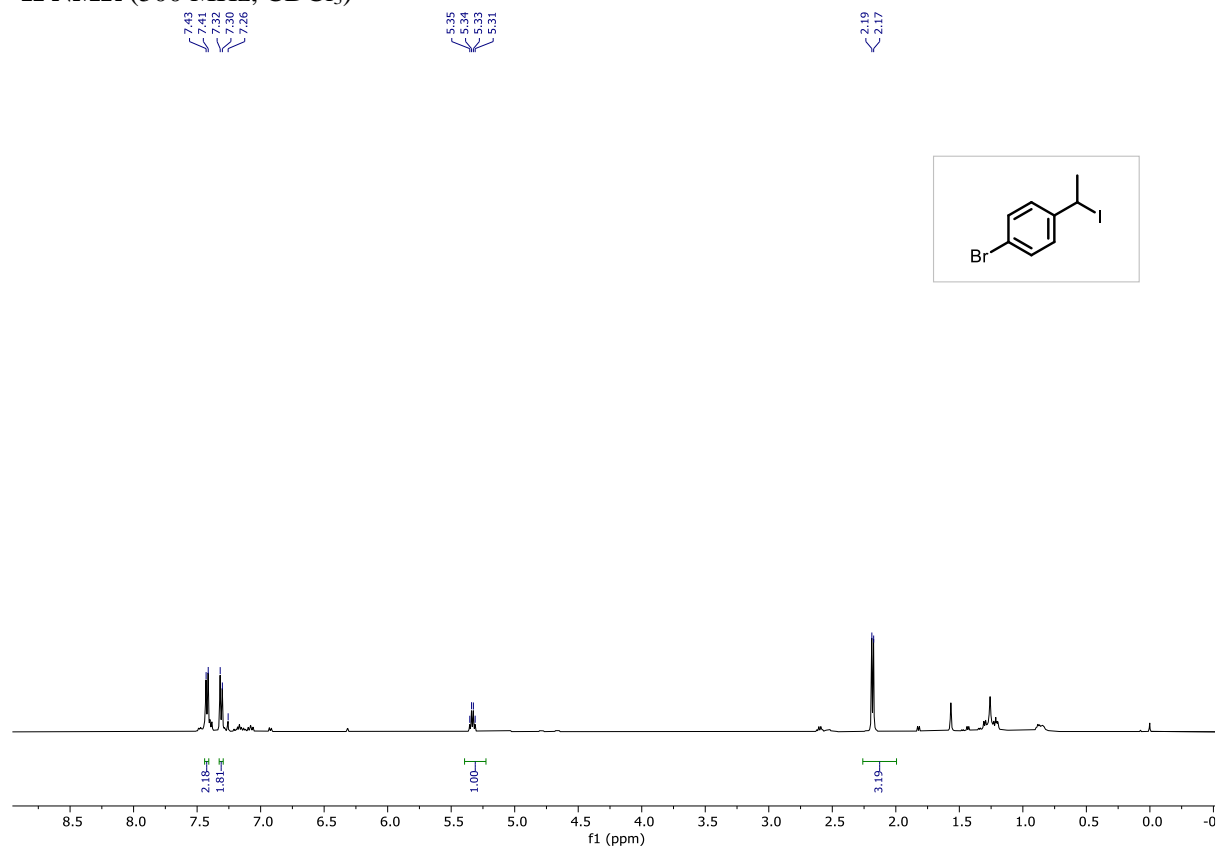

$^{13}\text{C NMR}$  (126 MHz,  $\text{CDCl}_3$ )

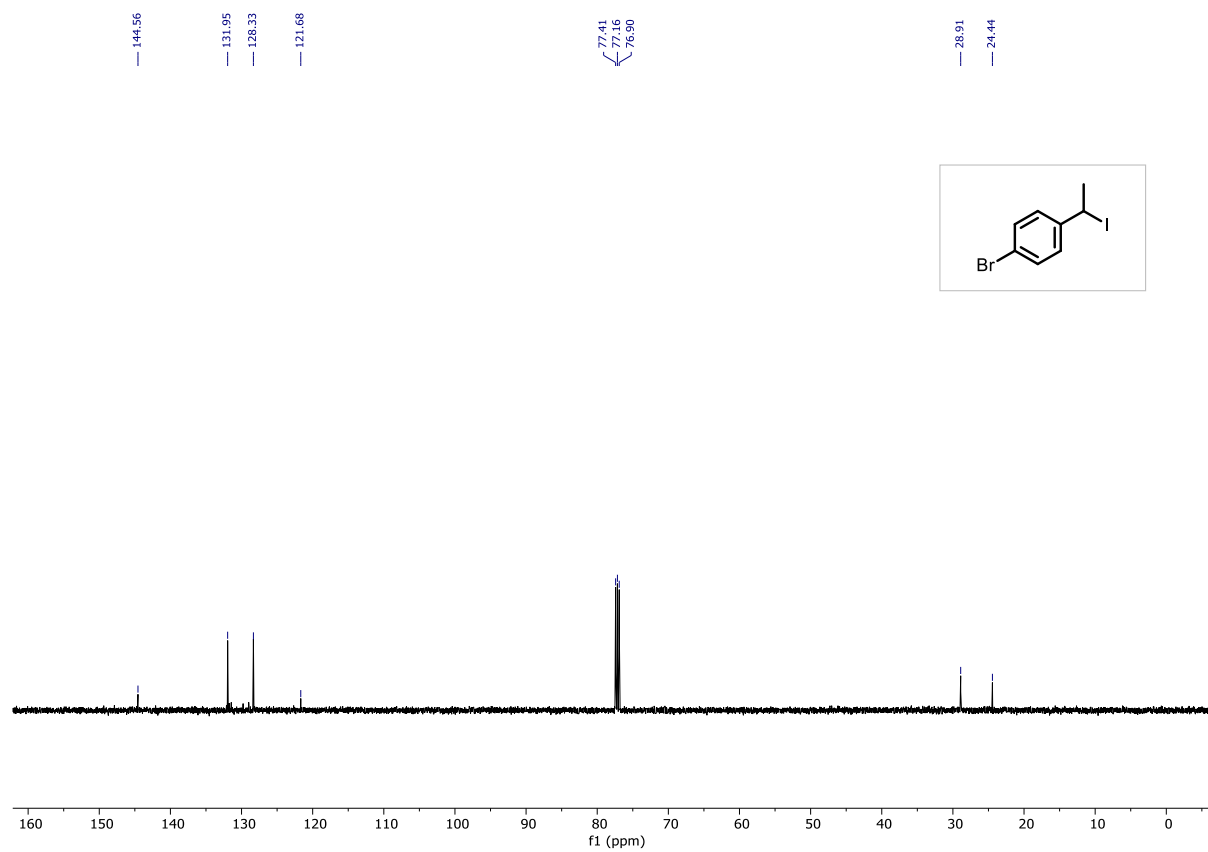

### 3-Hydroxyindolin-2-one (7a)

$^1\text{H}$  NMR (500 MHz,  $\text{CD}_3\text{OD}$ )

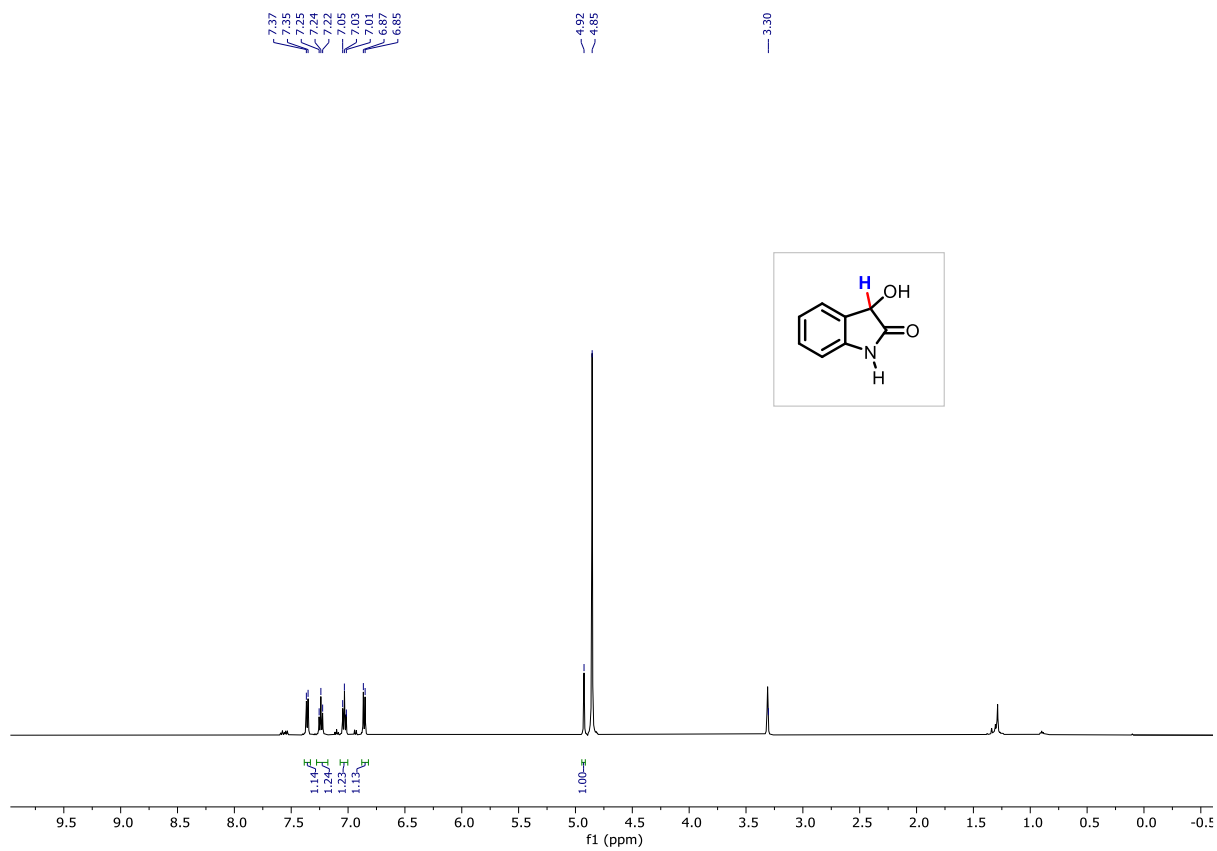

$^{13}\text{C}\{^1\text{H}\}$  NMR (126 MHz  $\text{CD}_3\text{OD}$ )

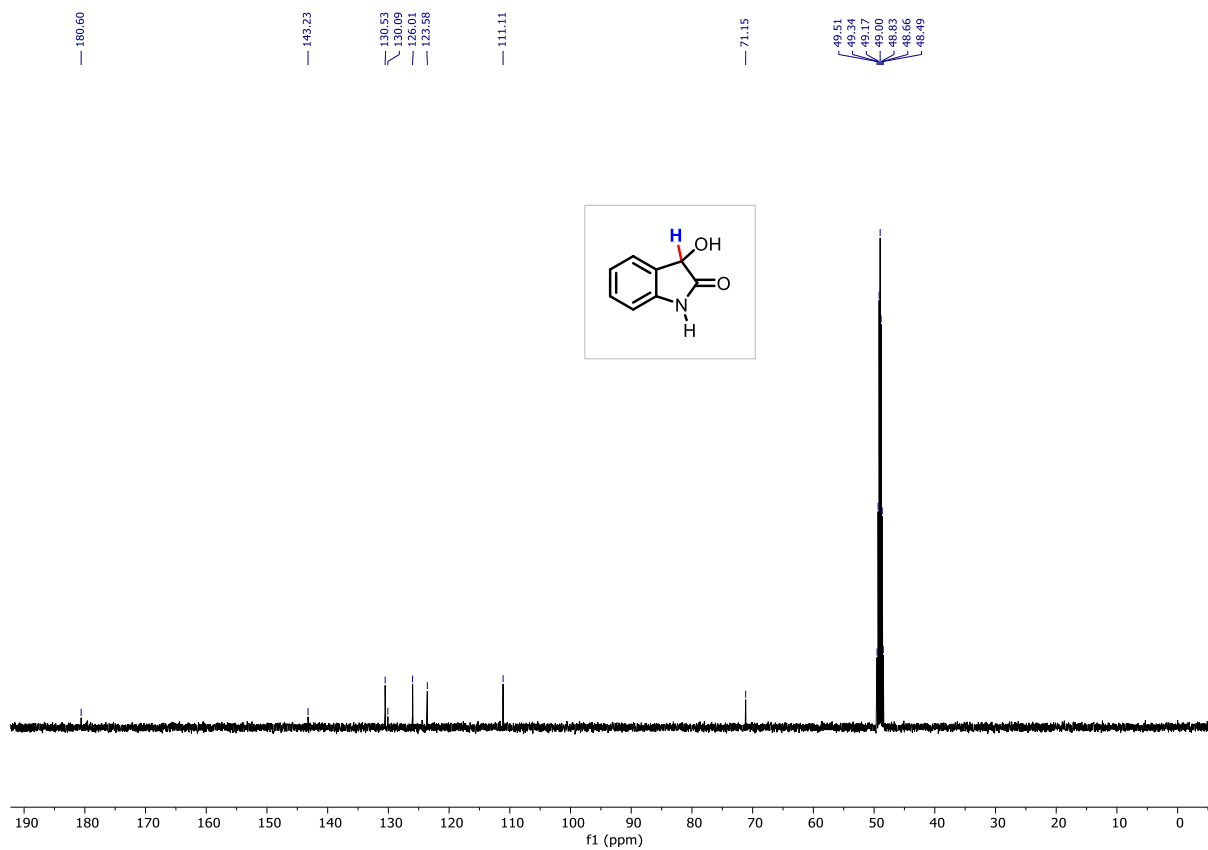

# Spiro [indoline-3,2'-[1, 3] oxathiolan]-2-one (7b)

$^1\text{H}$  NMR (500 MHz,  $\text{CDCl}_3$ )

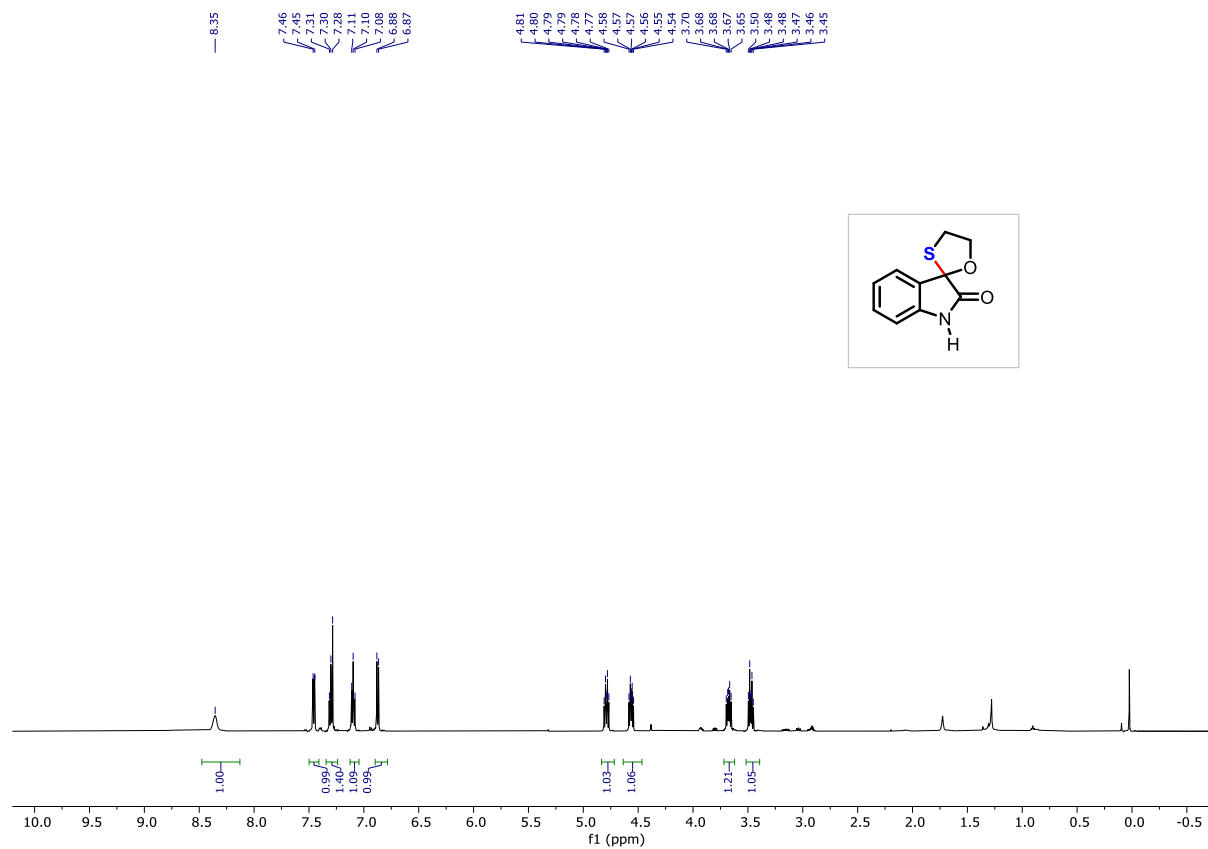

$^{13}\text{C}\{^1\text{H}\}$  NMR (126 MHz  $\text{CDCl}_3$ )

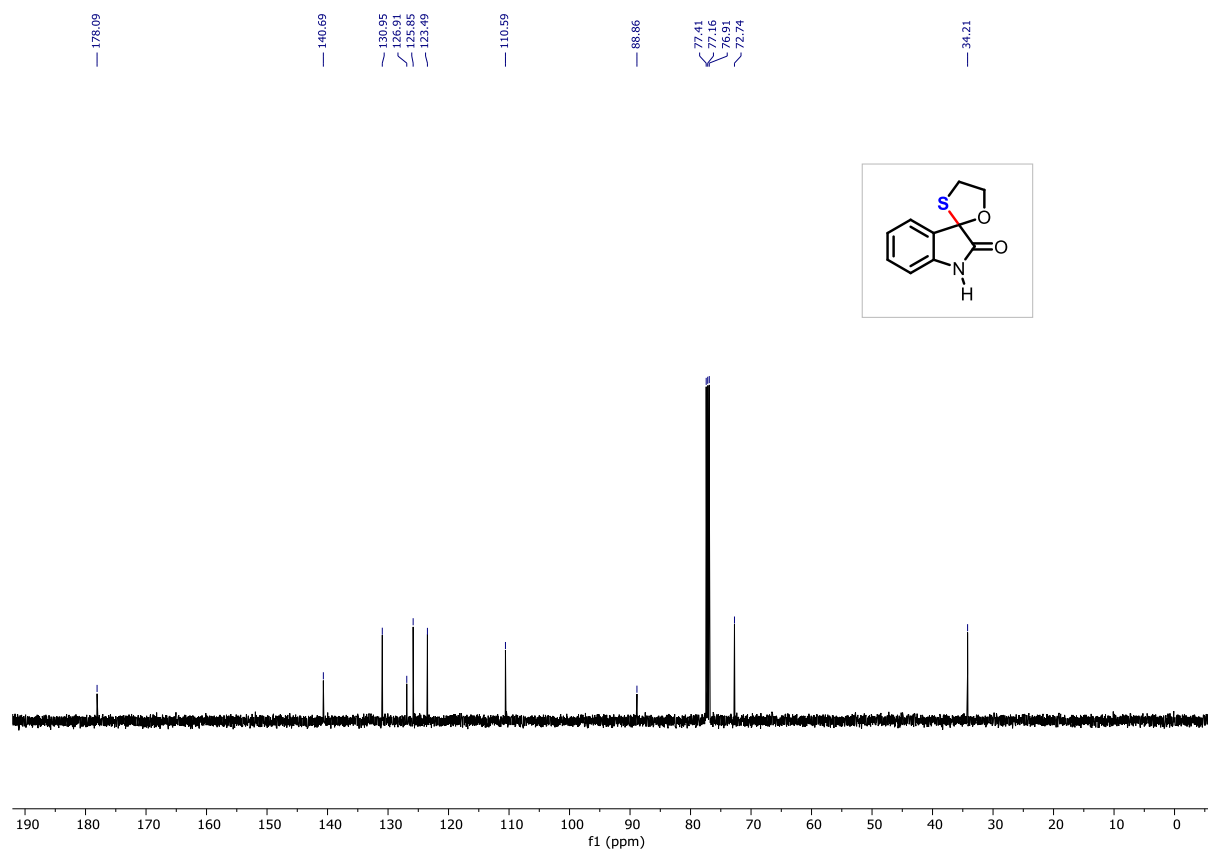

### 3-Tosylindolin-2-one (8a)

$^1\text{H}$  NMR (400 MHz,  $\text{DMSO-}d_6$ )

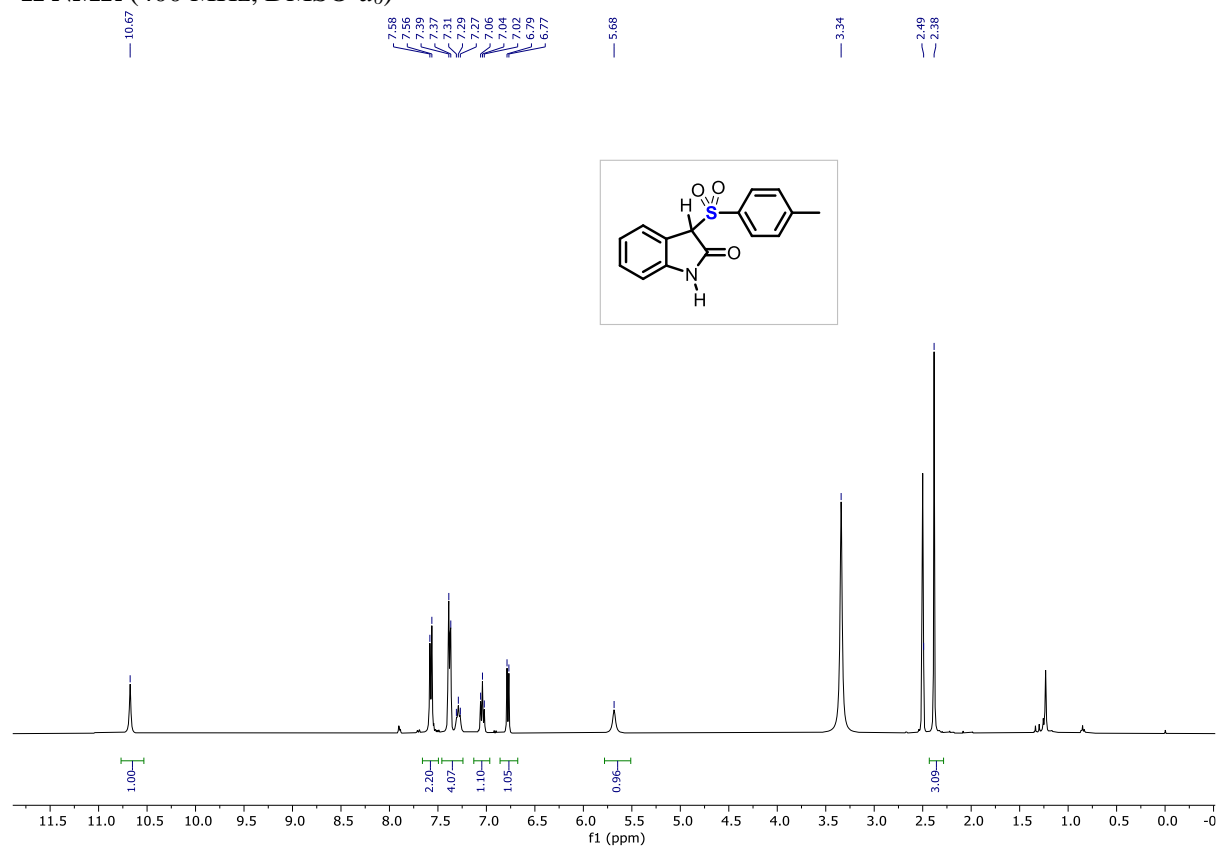

$^{13}\text{C}$  NMR (126 MHz,  $\text{DMSO-}d_6$ )

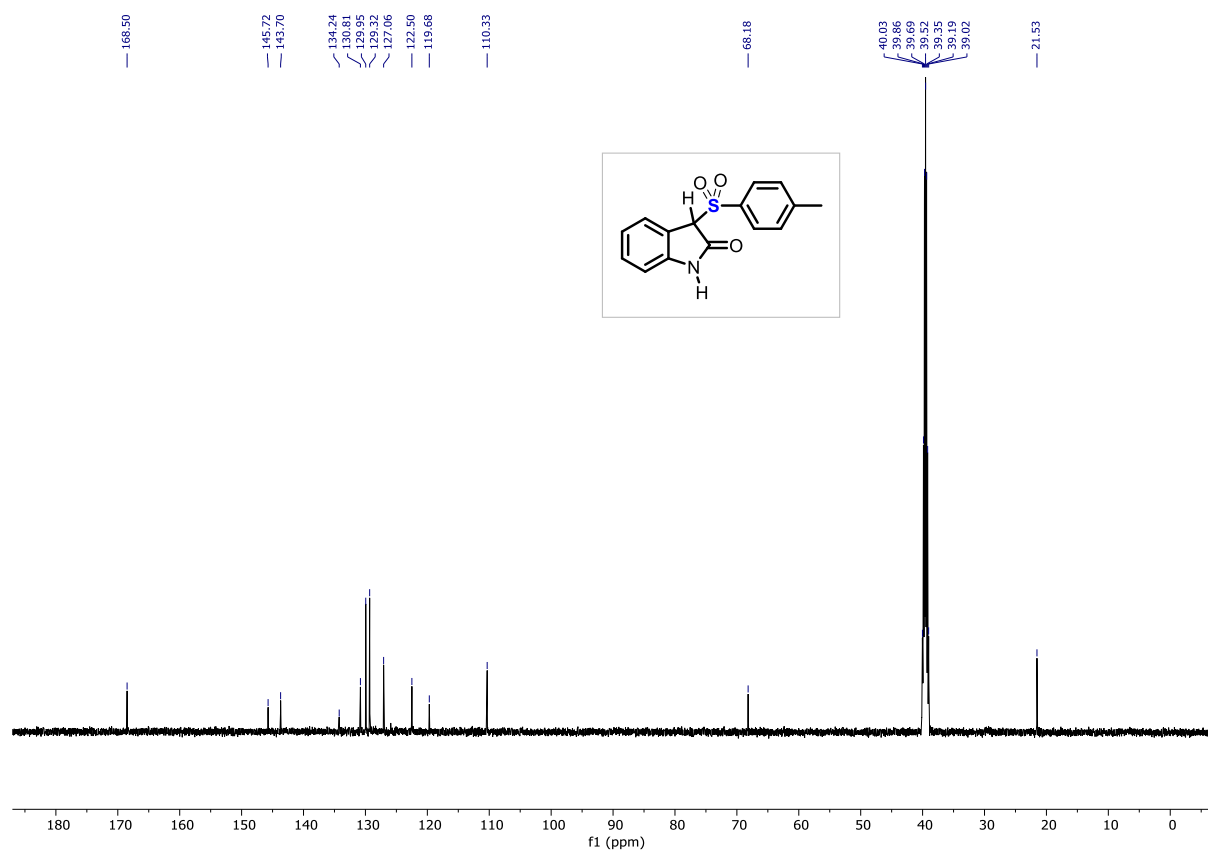

### 3-((4-Methoxyphenyl) thio)-1H-indole (8b)

$^1\text{H}$  NMR (500 MHz,  $\text{CDCl}_3$ )

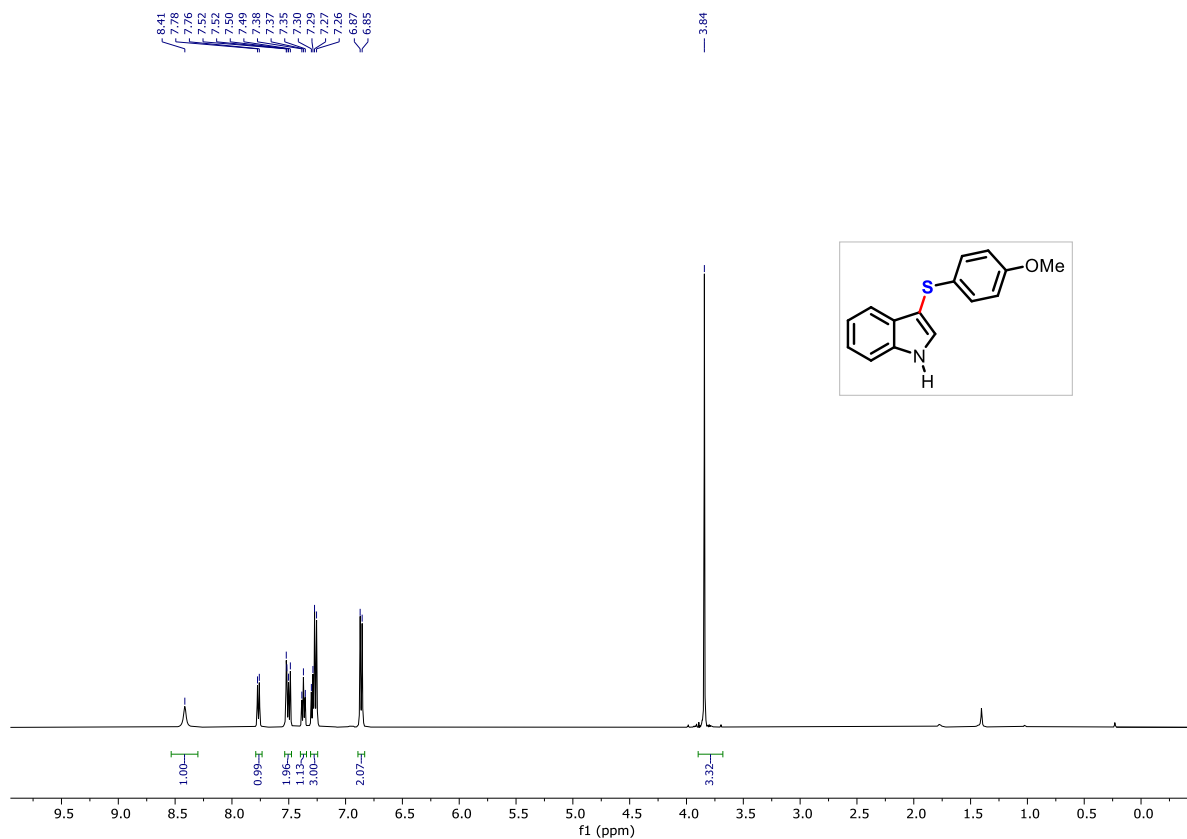

$^{13}\text{C}\{^1\text{H}\}$  NMR (126 MHz  $\text{CDCl}_3$ )

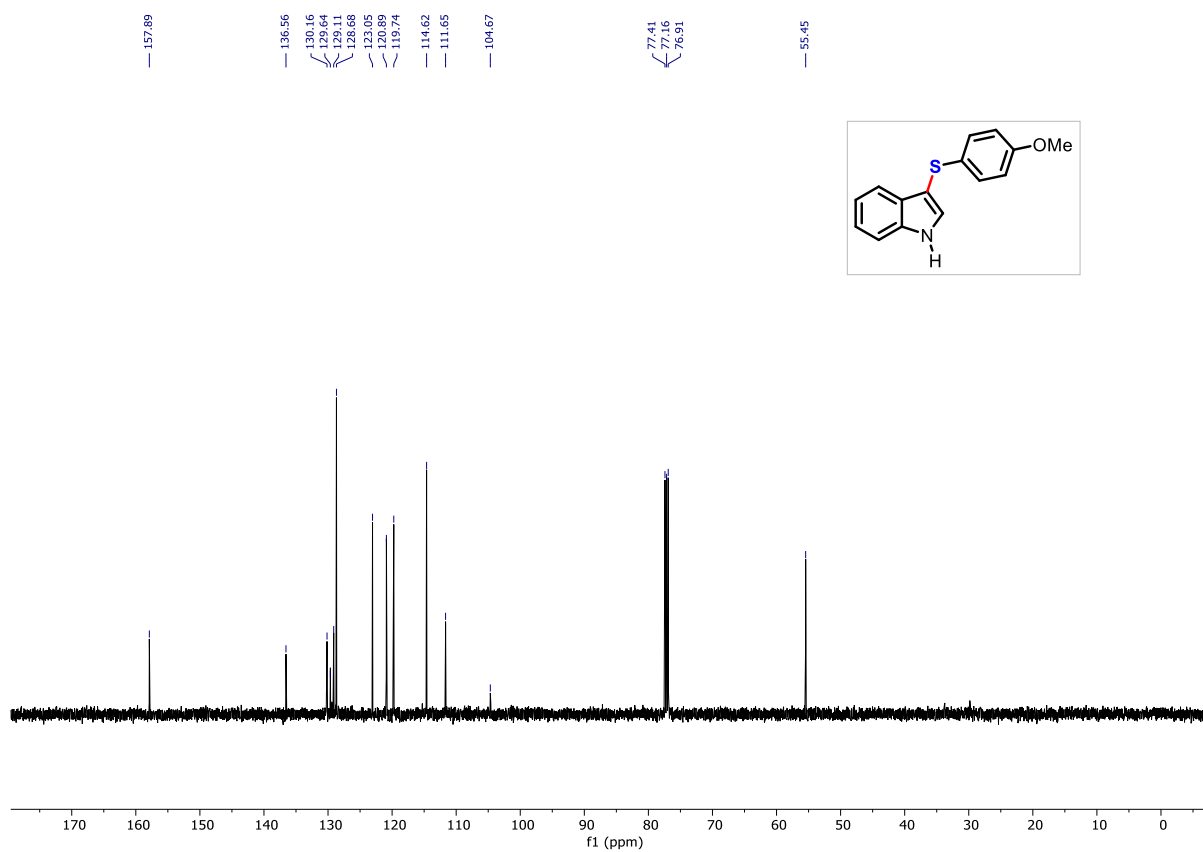

# 1-Bromo-4-((*p*-tolylsulfinyl) methyl) benzene (8c)

$^1\text{H}$  NMR (500 MHz  $\text{CDCl}_3$ )

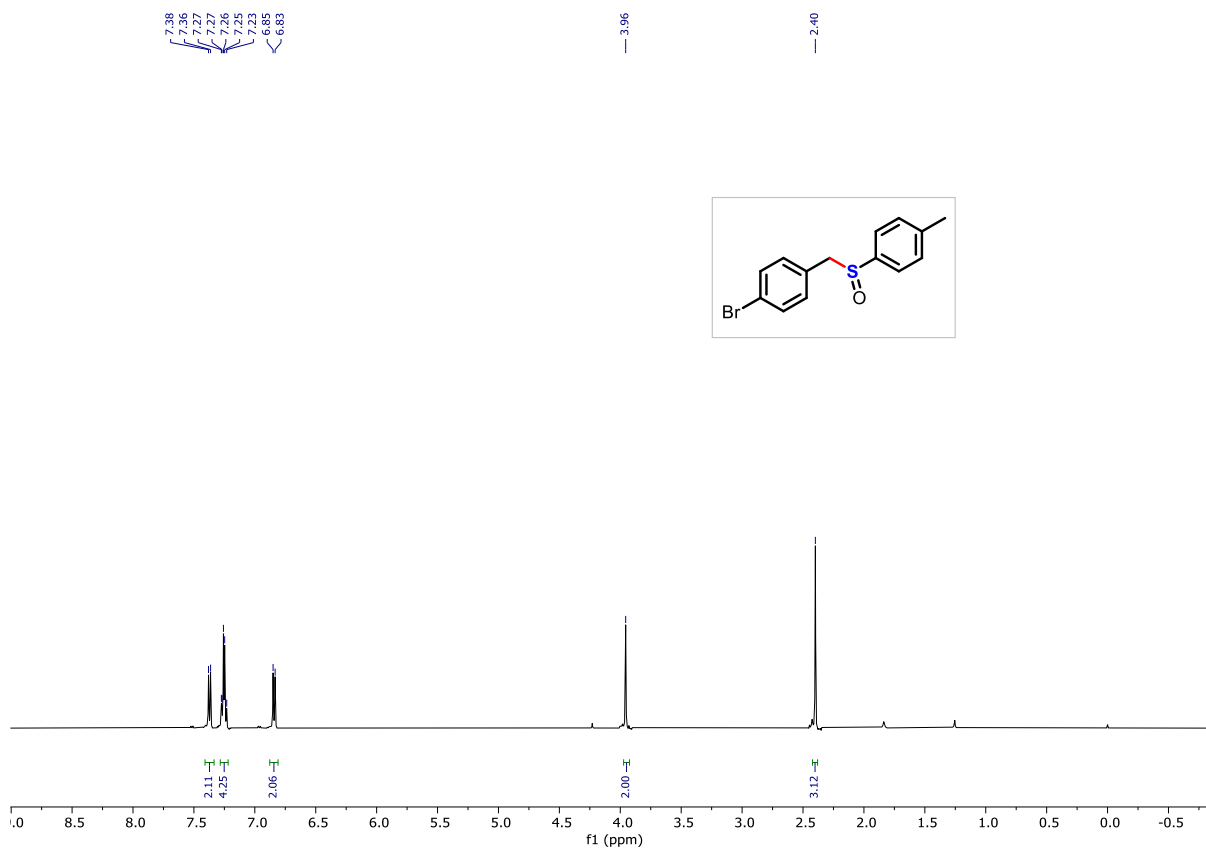

$^{13}\text{C}\{^1\text{H}\}$  NMR (126 MHz  $\text{CDCl}_3$ )

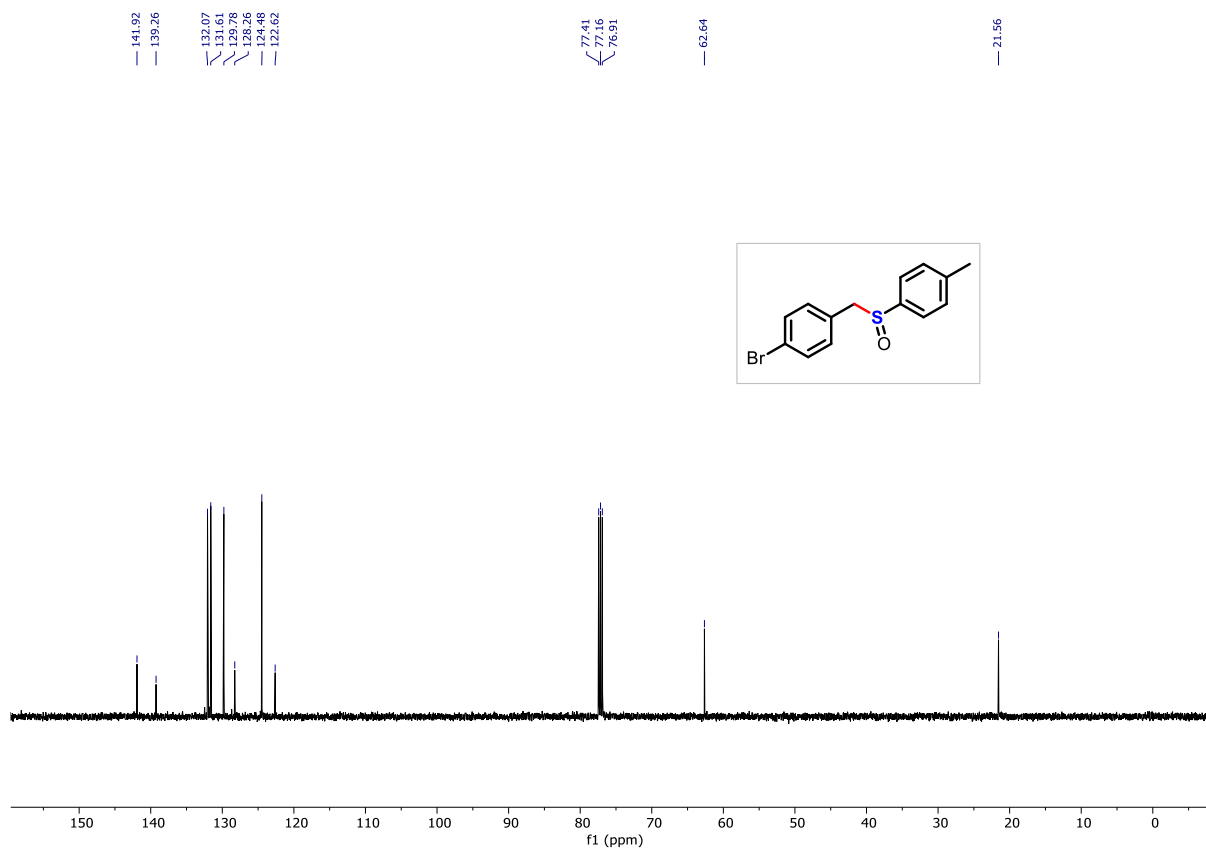

# ([1,1'-Biphenyl]-4-yl methyl) (*p*-tolyl) sulfane (8d)

$^1\text{H}$  NMR (500 MHz  $\text{CDCl}_3$ )

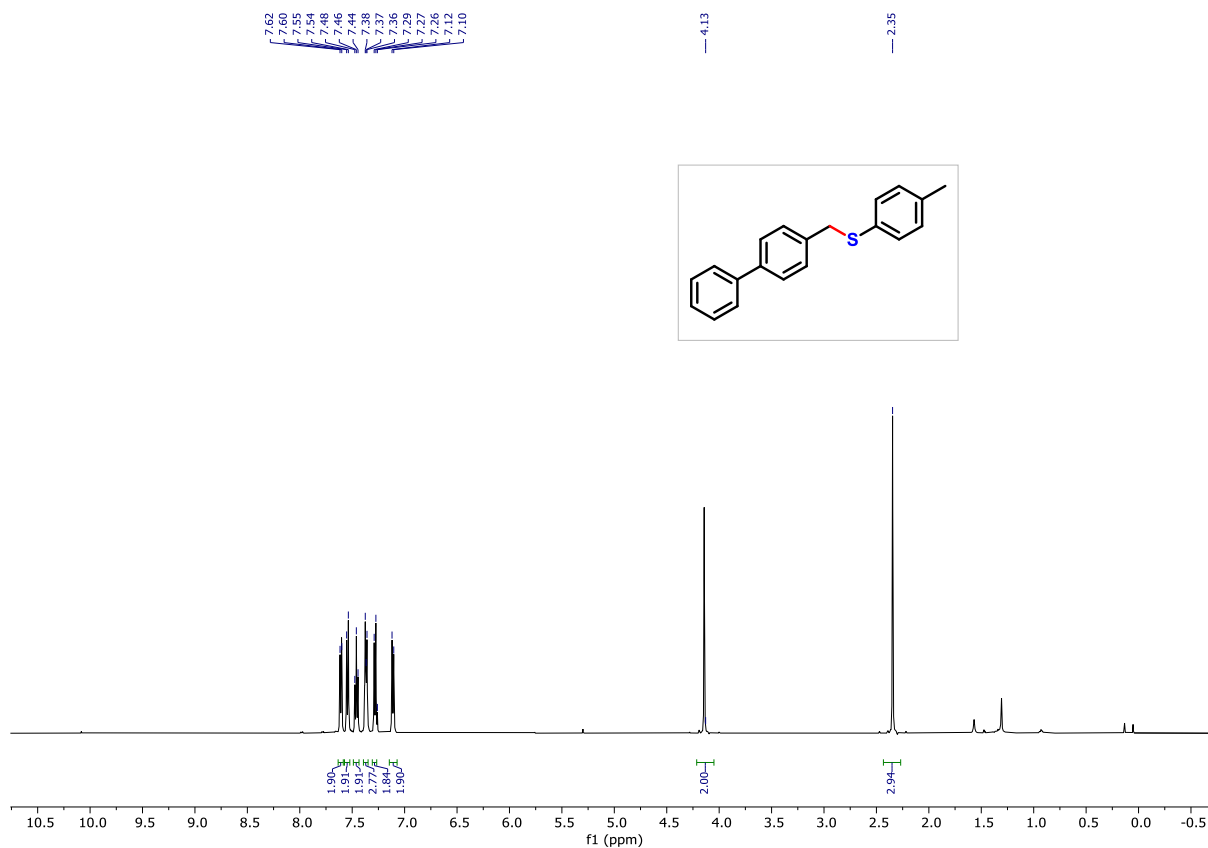

$^{13}\text{C}\{^1\text{H}\}$  NMR (126 MHz  $\text{CDCl}_3$ )

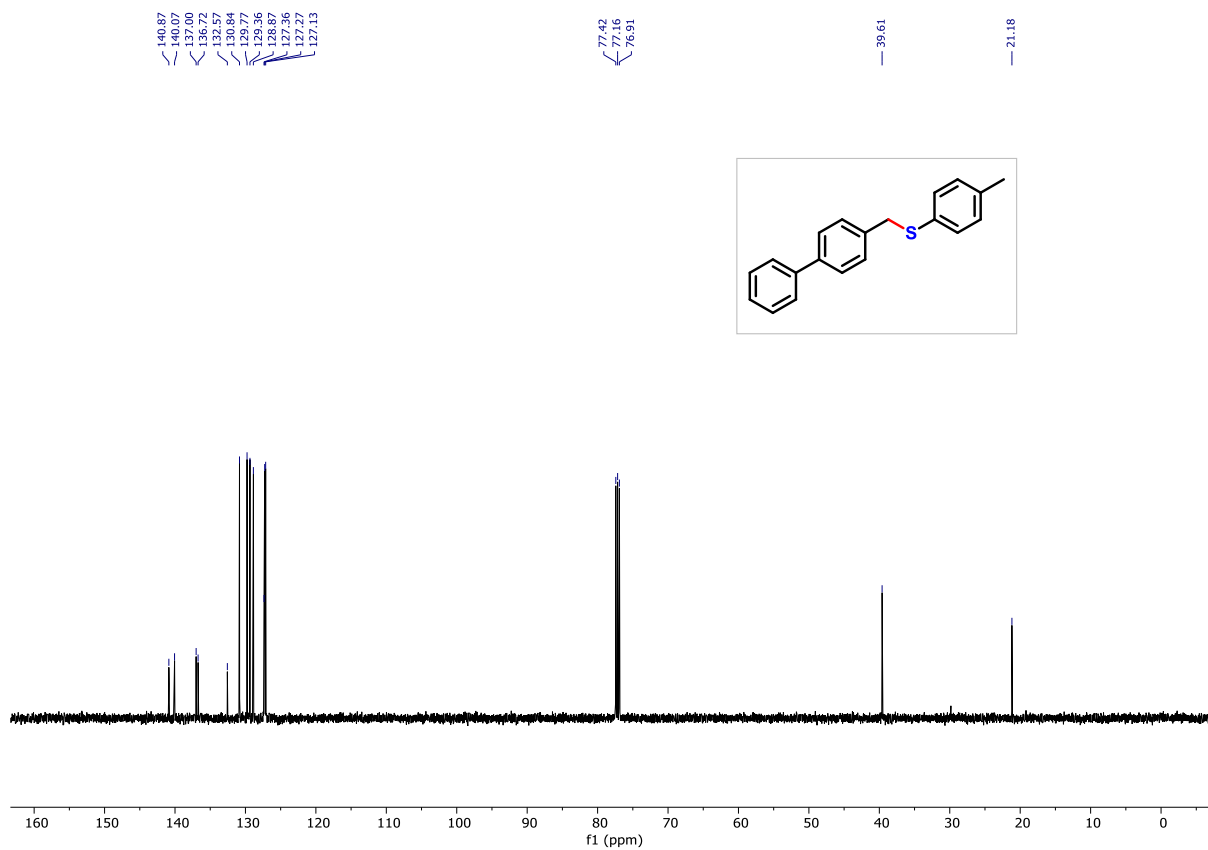



# 1,3-Dibenzyl-3-(*p*-tolylthio) indolin-2-one (8e)

$^1\text{H}$  NMR (500 MHz,  $\text{CDCl}_3$ )

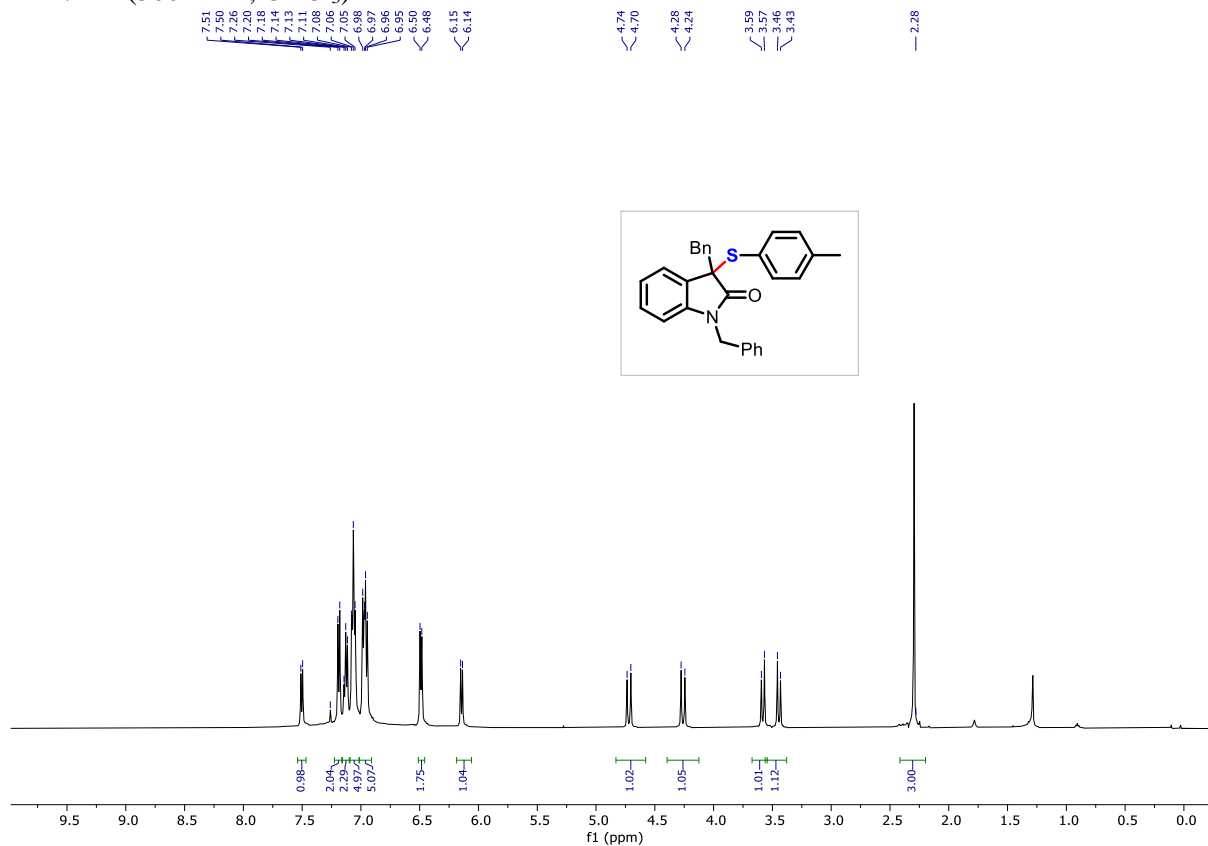

$^{13}\text{C}\{^1\text{H}\}$  NMR (126 MHz  $\text{CDCl}_3$ )

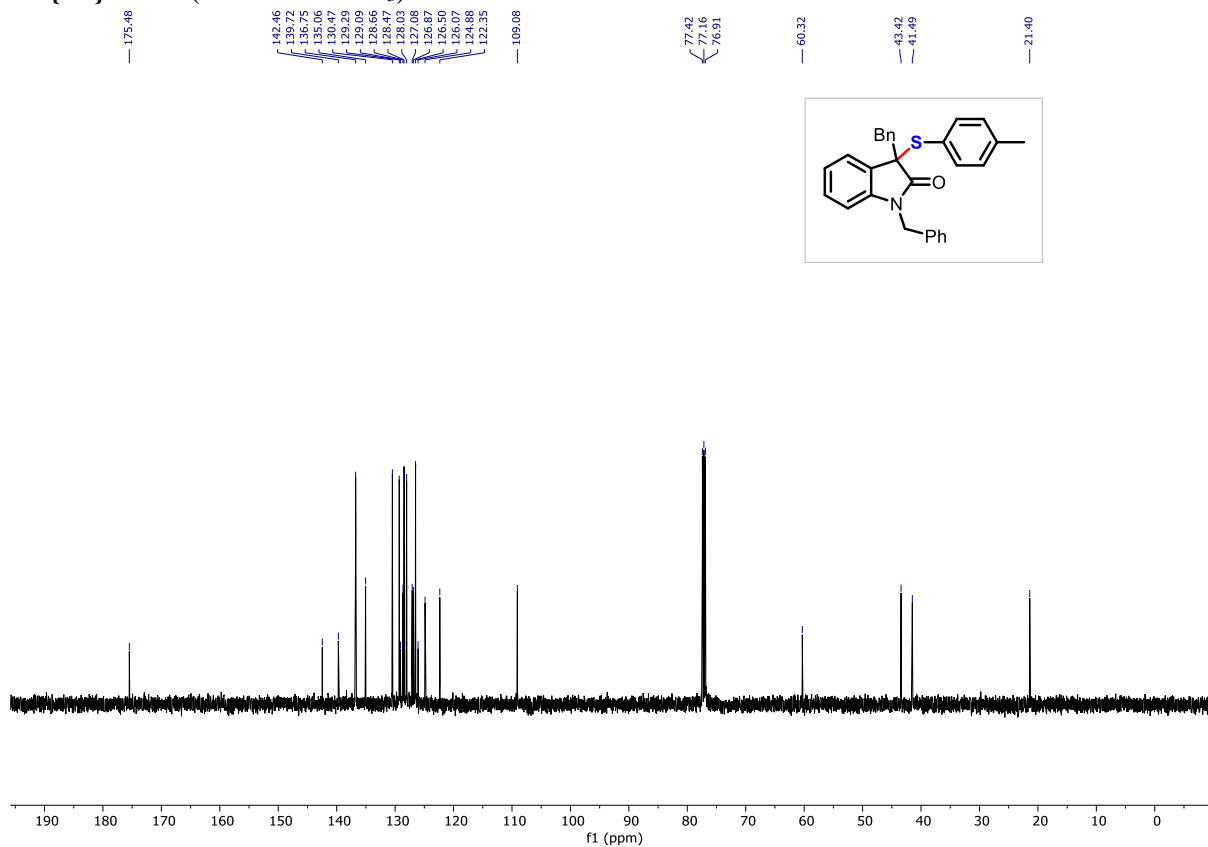

**(8*R*,9*S*,13*S*,14*S*)-13-Methyl-17-(*p*-tolylthio)-7,8,9,11,12,13,14,15,16,17-decahydro-6*H*-cyclopenta[*a*]phenanthren-3-ol (10a)**

**<sup>1</sup>H NMR (500 MHz CDCl<sub>3</sub>)**

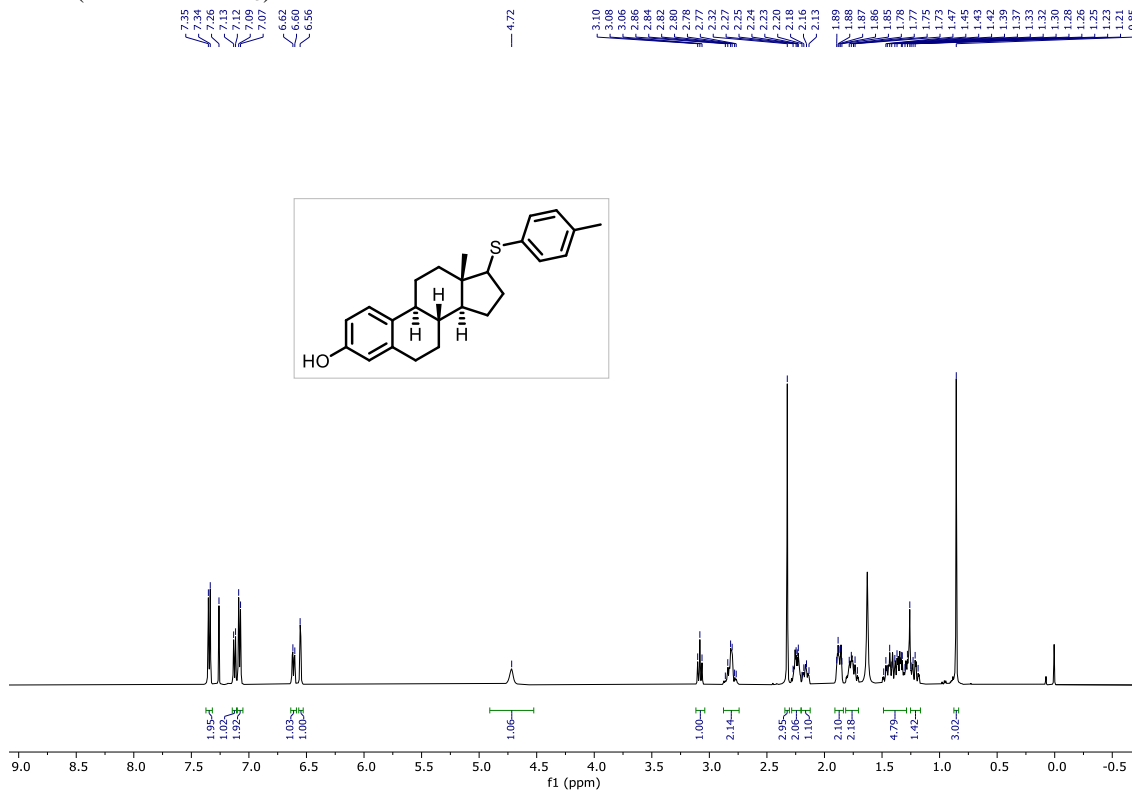

**<sup>13</sup>C{<sup>1</sup>H} NMR (126 MHz CDCl<sub>3</sub>)**

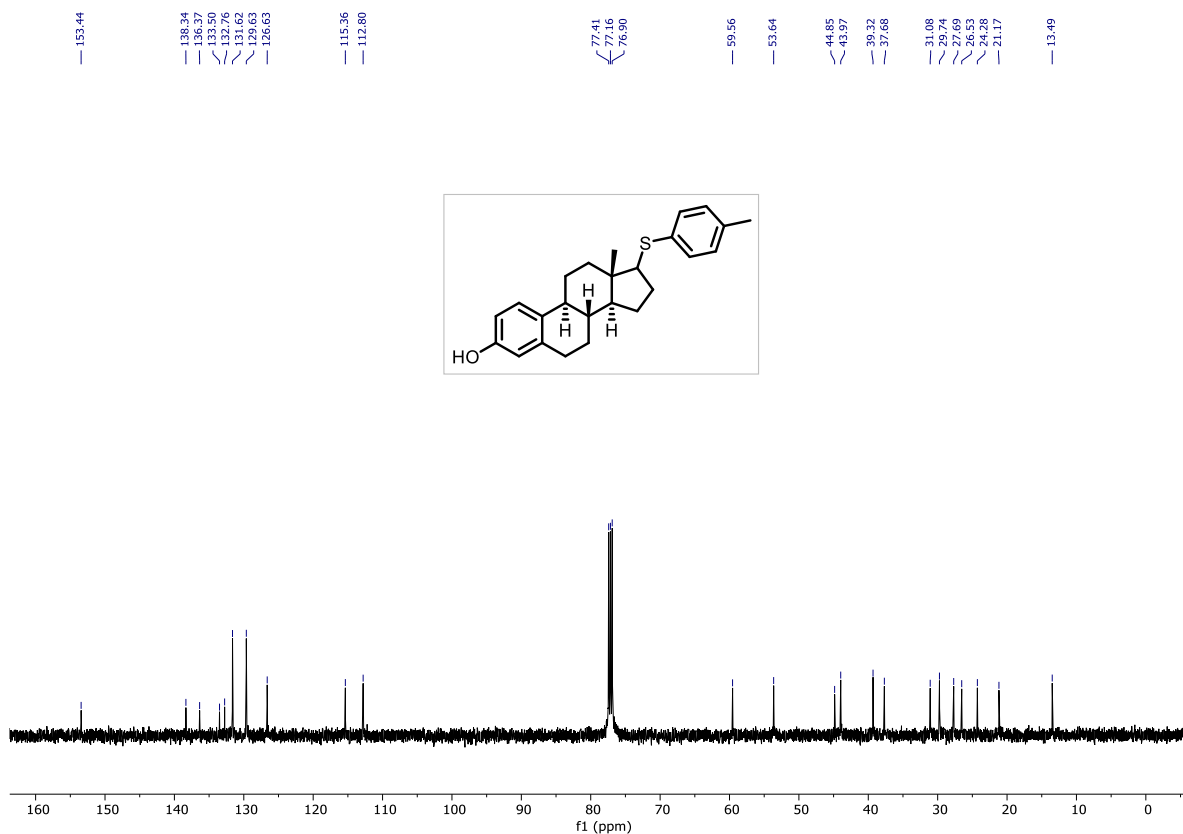

# (1S,2R,5S)-2-Isopropyl-5-methylcyclohexyl 4-((p-tolylthio) methyl) benzoate (10b)

<sup>1</sup>H NMR (500 MHz CDCl<sub>3</sub>)

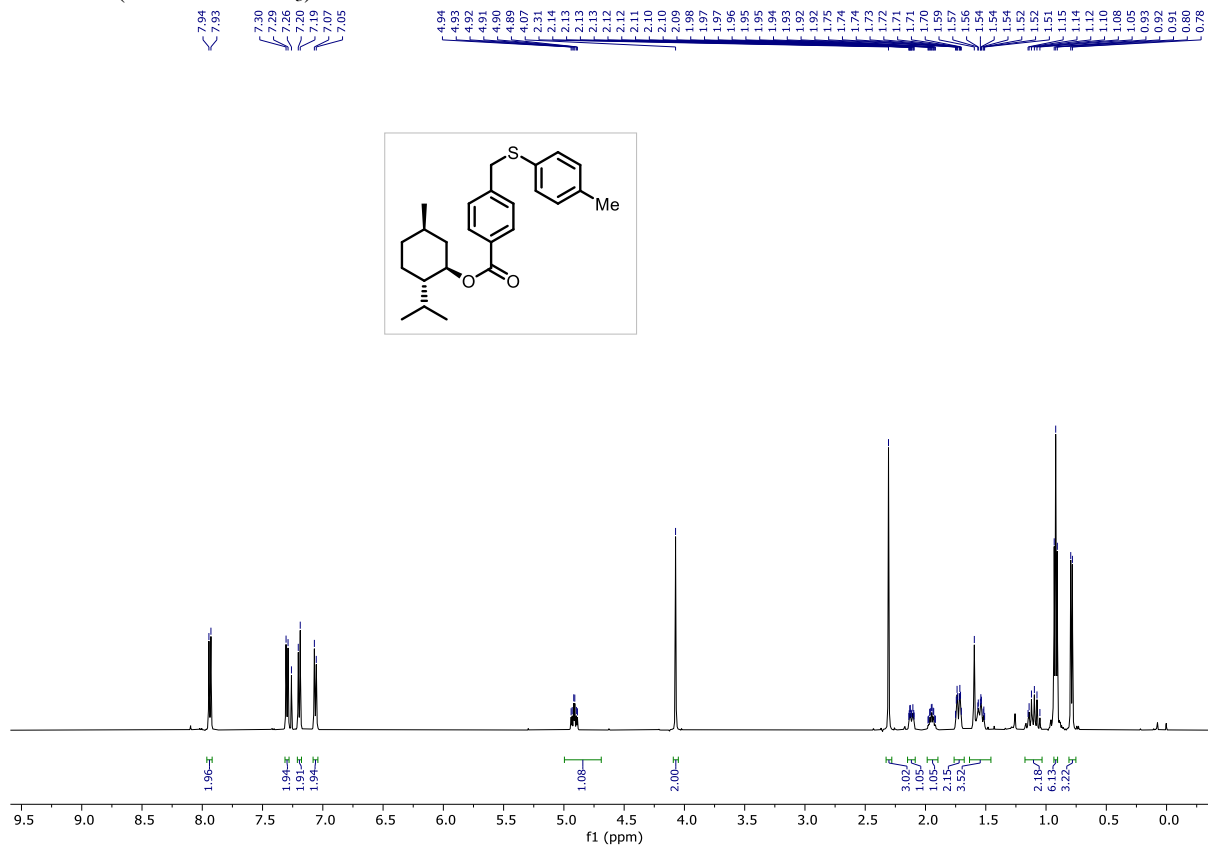

<sup>13</sup>C{<sup>1</sup>H} NMR (126 MHz CDCl<sub>3</sub>)

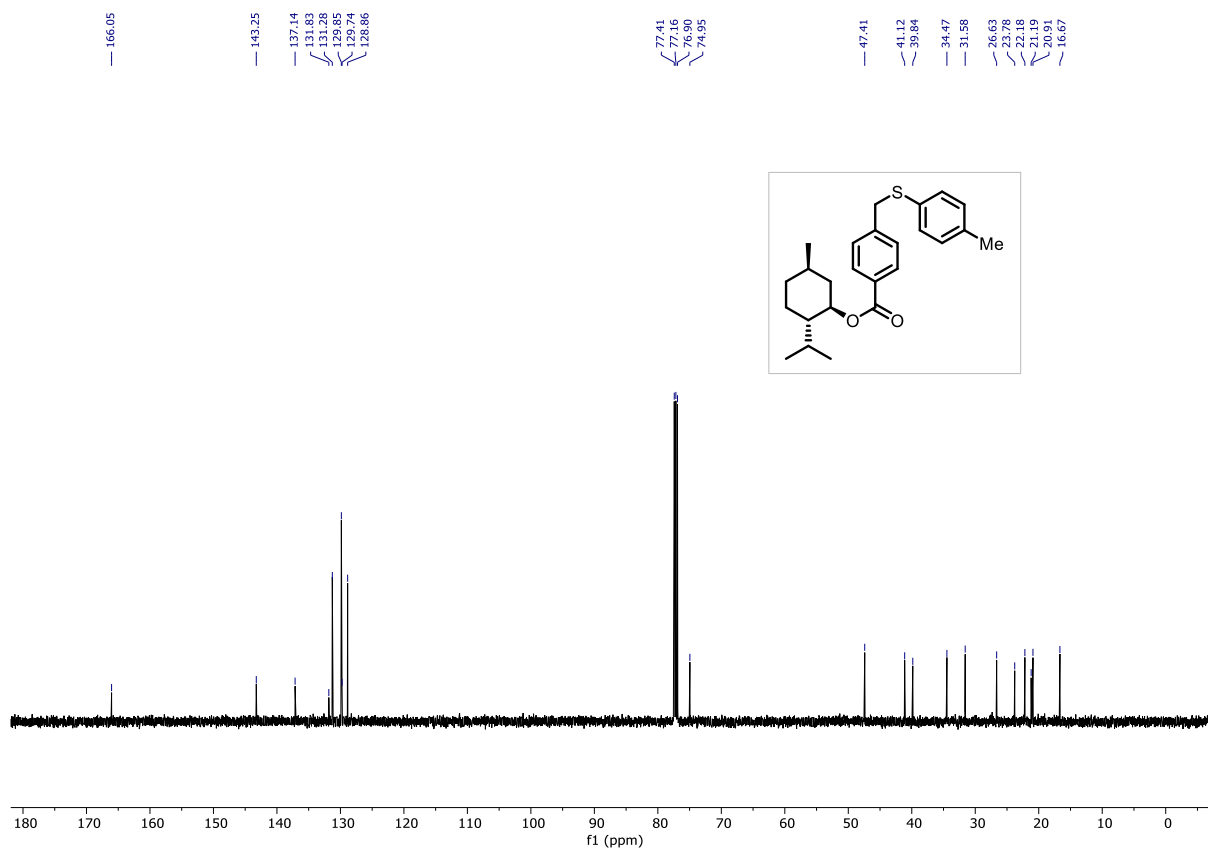

## 10. Copies of $^1\text{H}$ NMR Spectra of NMR Study

### $^1\text{H}$ NMR of HFIP

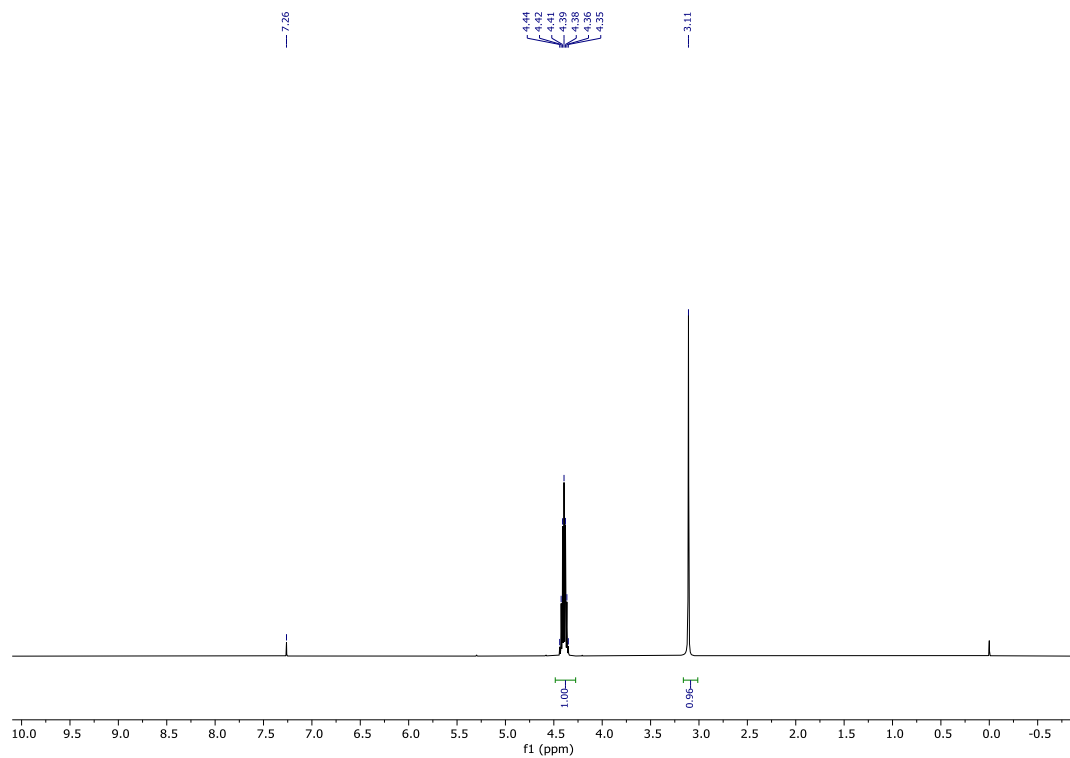

### $^1\text{H}$ NMR spectra of hydrogen bonded hydroxy group of HFIP with carbonyl group of isatin.

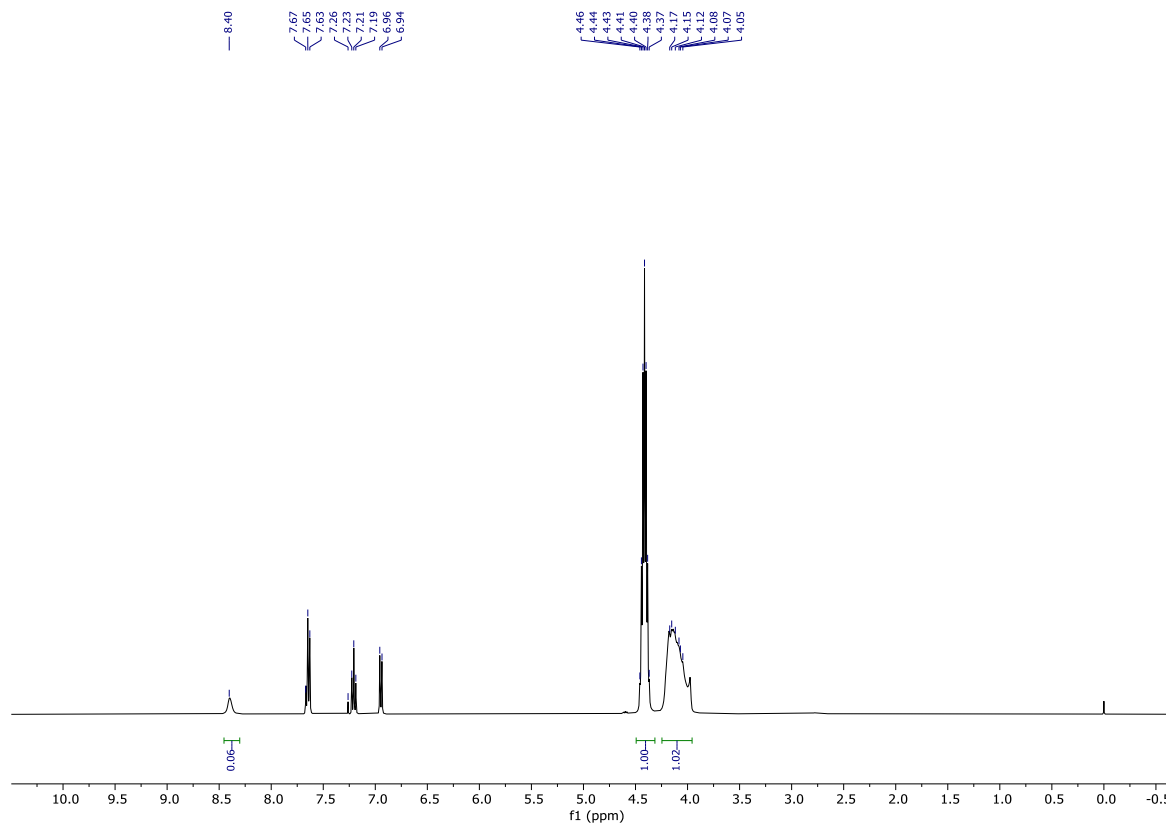

**<sup>1</sup>H NMR** of reaction mixture (Isatin and *p*-methyl thiophenol) in catalytic HFIP and mesitylene as internal standard

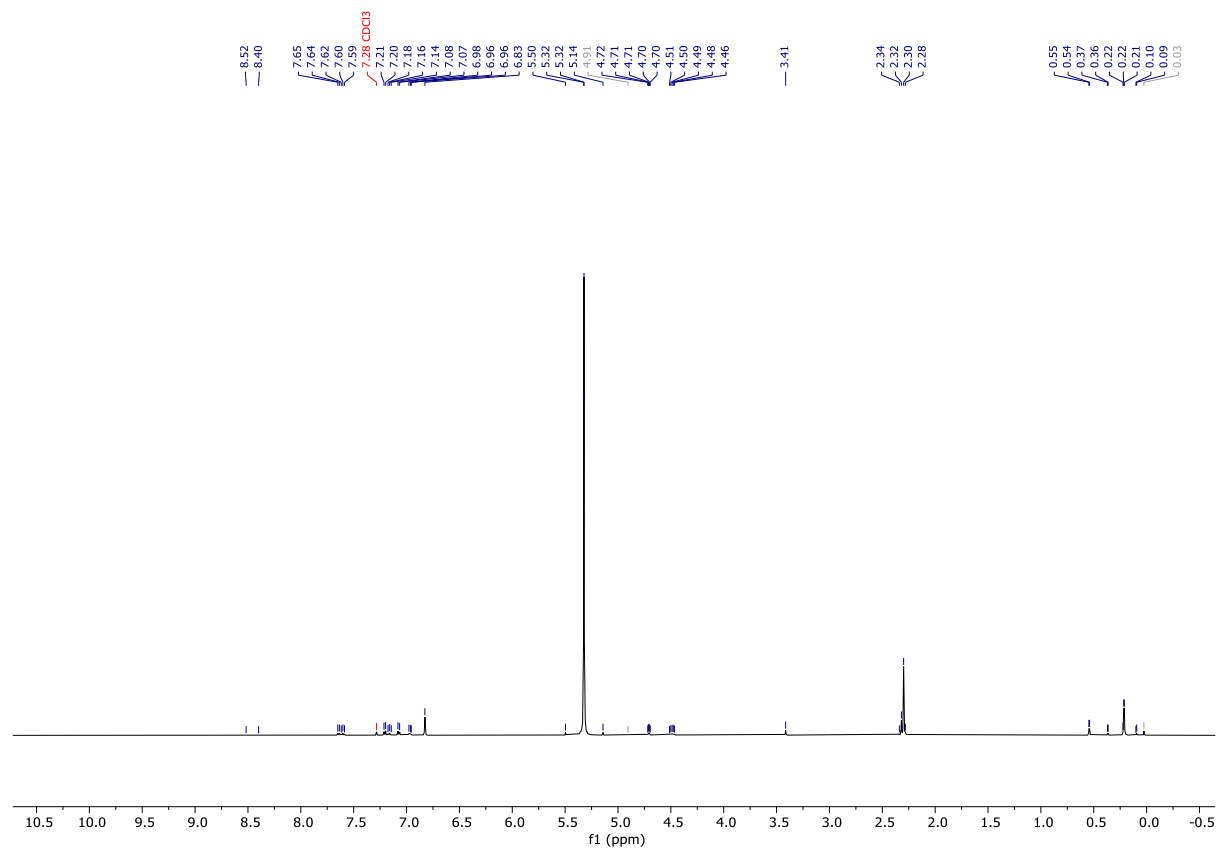

## 11. References

1. V. Sonamand and R. Kakkar, *Med. Chem. Commun.*, 2019, **10**, 351–368.
2. H. D. Khanal, S. H. Kim and Y. R. Lee, *RSC Adv.*, 2016, **6**, 58501-58510.
3. H. Qin, Q. Li, J. Xu, J. Zhang, W. Qu, W. Liu, F. Feng and H. Sun, *J. Org. Chem.*, 2019, **84**, 14342–14348.
4. N. Sakai, K. Moritaka and T. Konakahara, *Eur. J. Org. Chem.*, 2009, **24**, 4123–4127.
5. C. Li, X. Chen, R.-P. Bao, D.-L. Li, K. Zhang and D.-H. Wang, *RSC Adv.*, 2019, **9**, 30134–30138.
6. N. Taniguchi, *J. Org. Chem.*, 2020, **85**, 6528–6534.
7. G. Y. Li, G. Zheng and A. F. Noonan, *J. Org. Chem.*, 2001, **66**, 8677–8681.
8. J. Li, X.-E. Yang, S.-L. Wang, L.-L. Zhang, X.-Z. Zhou, S.-Y. Wang and S.-J. Ji, *Org. Lett.*, 2020, **22**, 4908–4913.
9. S. Thakur, O. S. Nayal, A. Sharma, R. Rana, N. Kumar and S. K. Maurya, *Eur. J. Org. Chem.*, 2018, **2018**, 6729–6732.
10. Y. Onishi, D. Ogawa, M. Yasuda and A. Baba, *J. Am. Chem. Soc.*, 2002, **124**, 13690–13691.
11. F. Lv, J. Xiao, J. Xiang, F. Guo, Z. Tang and L. Han, *J. Org. Chem.*, 2021, **86**, 3081–3088.
12. S. Golla, N. Anugu, S. Jalagam and H. P. Kokatla, *Org. Biomol. Chem.*, 2022, **20**, 808–816.
13. C. D. Prasad, M. Sattar and S. Kumar, *Org. Lett.*, 2017, **19**, 774–777.
14. (a) T. D. Kühne, M. Iannuzzi, M. D. Ben, V. V. Rybkin, P. Seewald, F. Stein, T. Laino, R. Z. Khaliullin, O. Schütt, F. Schiffmann, D. Golze, J. Wilhelm, S. Chulkov, M. H. Bani-Hashemian, V. Weber, U. Borštnik, M. TAILLEFUMIER, A. S. Jakobovits, A. Lazzaro, H. Pabst, T. Müller, R. Schade, M. Guidon, S. Andermatt, N. Holmberg, G. K. Schenter, A. Hehn, A. Bussy, F. Belleflamme, G. Tabacchi, A. Glöß, M. Lass, I. Bethune, C. J. Mundy, C. Plessl, M. Watkins, J. V. Vondele, M. Krack and J. Hutter, *J. Chem. Phys.* 2020, **152**, 194103; (b) J. P. Perdew, K. Burke, M. Ernzerhof, *Phys. Rev. Lett.* 1996, **77**, 1365-1368 (c) S. Grimme, J. Antony, S. Ehrlich, and H. Krieg, *J. Chem. Phys.*, 2010, **132**, 154104-154123; (d) G. Henkelman, B. P. Uberuaga and H. Jonsson, *J. Chem. Phys.*, 2000, **113**, 9901-9904.
